# Supplementary material for: Construction and Comprehensive Analysis of Dysregulated Long Noncoding RNA-Associated Competing Endogenous RNA Network in Moyamoya Disease
Source: Comput Math Methods Med. 2020 Jun 13;2020:2018214. doi: 10.1155/2020/2018214 (PMC7306867; doi:10.1155/2020/2018214)
Supplement: Supplementary Materials — Table S1: DEmRNA list in excel file. Table S2: DElncRNA list in excel file. Table S3: increased miRNA list in excel file. Table S4: decreased miRNA list in excel file. Table S5: drugs in excel file. Figure S1: DElncRNA and DemiRNA in tiff format. [file 2018214.f1.zip › Table S1-DEmRNAs.xlsx]

## Sheet: Sheet 1
ProbeName	pvalues	foldchange	type	GeneSymbol
LNCA_23_P385835	3.71e-08	4.28299	mRNA	GPR27
LNCA_23_P151791	8.6e-06	2.04421	mRNA	LTB4R
LNCA_23_P102060	3.75e-06	2.16667	mRNA	SSFA2
LNCA_23_P429491	9.43e-06	2.21669	mRNA	C11orf82
LNCA_33_P3216192	0.00689424	0.363342	mRNA
LNCA_23_P201386	1.1e-07	0.499445	mRNA	DDAH1
LNCA_33_P3266255	7.05e-06	3.09362	mRNA	CSGALNACT2
LNCA_23_P137814	2e-07	2.40099	mRNA	ATP6V0B
LNCA_23_P411188	2.19e-08	3.27106	mRNA	CHRNA10
LNCA_23_P61398	2.04e-06	2.44354	mRNA	PIM3
LNCA_23_P82296	3.57e-06	2.39361	mRNA	GNB2
LNCA_23_P41987	4.91e-06	0.343417	mRNA	GFRA3
LNCA_32_P161762	1.64e-08	2.33336	mRNA	RUNX2
LNCA_33_P3227686	1.26e-07	0.425925	mRNA	FLJ43860
LNCA_33_P3390673	1.55e-06	3.11507	mRNA
LNCA_33_P3395310	1.17e-06	0.495404	mRNA
LNCA_33_P3394993	1.03e-06	0.453952	mRNA	PREX2
LNCA_33_P3470781	3.89e-08	4.14167	mRNA	RALGAPA2
LNCA_33_P3377130	4.09e-08	2.38194	mRNA	MAP3K5
LNCA_33_P3795707	2.12e-05	2.39135	mRNA	SNORA16B
LNCA_33_P3305620	3.11e-07	0.381917	mRNA	TIPARP
LNCA_23_P256223	1.64e-07	2.01802	mRNA	VBP1
LNCA_23_P12128	1.66e-05	0.441631	mRNA	TSHB
LNCA_23_P212050	5.47e-06	0.484371	mRNA	BCHE
LNCA_33_P3316878	0.000112158	0.41529	mRNA	CHPF
LNCA_21_P0010767	7.3e-09	3.25632	mRNA	XLOC_l2_001064
LNCA_33_P3308586	3.17e-08	0.412232	mRNA	DUXA
LNCA_33_P3773261	1.76e-05	2.27031	mRNA	NQO2
LNCA_33_P3878772	0.000304242	2.14816	mRNA	JAK2
LNCA_24_P46130	1.85e-05	2.36078	mRNA	ACPP
LNCA_23_P380371	1.02e-06	2.89448	mRNA	IPMK
LNCA_24_P247902	3.72e-08	0.371979	mRNA	PCLO
LNCA_23_P1981	2.8e-07	0.444484	mRNA	INS
LNCA_33_P3388618	3.64e-08	0.415939	mRNA	TNK1
LNCA_33_P3255354	2.03e-07	2.68327	mRNA	NT5C2
LNCA_23_P5983	2.72e-06	0.439231	mRNA	PLTP
LNCA_23_P133902	1.52e-06	0.380706	mRNA	PSORS1C1
LNCA_23_P151637	0.000374789	2.89289	mRNA	RNASE2
LNCA_23_P252283	1.25e-05	2.0809	mRNA	RNF135
LNCA_23_P56759	2.13e-05	2.16475	mRNA	KRCC1
LNCA_23_P8311	6.76e-07	2.38699	mRNA	TDP2
LNCA_24_P363278	6.95e-08	4.07	mRNA	MAK
LNCA_33_P3270203	1.81e-05	0.481004	mRNA	DIS3L2
LNCA_23_P66011	1.08e-07	2.70264	mRNA	NECAB2
LNCA_33_P3389898	1.88e-08	0.417907	mRNA	OR4D11
LNCA_33_P3394405	1.03e-05	0.466604	mRNA	LOC727721
LNCA_33_P3369864	3.92e-07	0.404978	mRNA
LNCA_33_P3235189	0.000160733	0.42035	mRNA	ANKRD13B
LNCA_21_P0013504	3.7e-08	0.476021	mRNA	XLOC_l2_014388
LNCA_23_P215331	2.17e-05	0.456065	mRNA	CRHR2
LNCA_23_P351275	4.84e-09	5.39679	mRNA	UPP1
LNCA_23_P207666	3.27e-07	2.07931	mRNA	USP6
LNCA_33_P3292769	1.57e-05	2.21033	mRNA	NFAM1
LNCA_32_P58280	1.19e-07	3.35751	mRNA	EXOC6
LNCA_33_P3301489	2.28e-07	0.407868	mRNA
LNCA_23_P352950	1.9e-07	0.420328	mRNA	PNMA5
LNCA_33_P3419621	0.000837537	0.308145	mRNA	LOC100289580
LNCA_23_P113656	2.2e-06	0.488889	mRNA	TUBB4A
LNCA_21_P0008594	4.64e-06	0.422027	mRNA	XLOC_011181
LNCA_33_P3260445	1.3e-05	2.26147	mRNA	DYNLT1
LNCA_23_P310560	8.45e-05	2.56132	mRNA	NUDT16
LNCA_23_P306941	2.28e-06	3.42855	mRNA	RGL4
LNCA_24_P181672	8.82e-07	2.80624	mRNA	B3GNTL1
LNCA_23_P42198	1.49e-05	2.1059	mRNA	HIST1H3G
LNCA_33_P3376140	1.99e-06	3.86457	mRNA	KCNJ15
LNCA_21_P0011897	7.76e-10	4.75591	mRNA	14-Sep
LNCA_21_P0011120	2.7e-07	2.14738	mRNA	PARP4
LNCA_32_P220750	0.000131797	2.20566	mRNA	PLGLB1
LNCA_23_P70547	4.11e-07	2.23426	mRNA	HSPA1L
LNCA_23_P212522	9.78e-08	2.68458	mRNA	ATP11B
LNCA_24_P178300	2.46e-06	0.382797	mRNA	PRR21
LNCA_23_P55779	2.58e-07	0.461292	mRNA	CYP2A13
LNCA_24_P56388	1.67e-05	2.3209	mRNA	HIF1A
LNCA_32_P465742	8.93e-08	2.15463	mRNA	PIP5K1B
LNCA_33_P3253144	1.99e-08	2.96207	mRNA	DOK3
LNCA_23_P218079	1.25e-07	2.28808	mRNA	SLC38A2
LNCA_23_P417113	7.97e-07	2.10774	mRNA	RBM33
LNCA_32_P212058	3.57e-09	3.34315	mRNA	CEP19
LNCA_23_P98930	2.13e-05	2.52138	mRNA	C12orf35
LNCA_23_P37988	2.58e-06	2.23749	mRNA	CPNE2
LNCA_23_P30315	1.26e-06	2.41531	mRNA	TRIM7
LNCA_21_P0006885	1.28e-07	2.2555	mRNA	XLOC_008528
LNCA_33_P3327470	5.72e-05	0.457769	mRNA
LNCA_24_P212129	3.53e-06	2.26858	mRNA	ZNF33A
LNCA_23_P150407	1.29e-05	0.430953	mRNA	CREB3L1
LNCA_33_P3368830	1.78e-09	0.452731	mRNA	LY9
LNCA_24_P18917	2.91e-06	0.428959	mRNA	LMF1
LNCA_33_P3336968	0.000547367	0.361293	mRNA	TRNT1
LNCA_24_P71468	4.63e-07	4.11383	mRNA	QPCT
LNCA_33_P3224809	1.03e-05	2.3488	mRNA	IL17RA
LNCA_23_P40217	9.52e-10	0.44821	mRNA	DOK5
LNCA_24_P295245	2.77e-08	6.67145	mRNA	ASPH
LNCA_23_P85703	1.16e-07	0.442937	mRNA	SOX13
LNCA_21_P0013564	1.21e-06	5.55068	mRNA	CNTNAP3B
LNCA_24_P399980	1.76e-08	0.440201	mRNA	HEPH
LNCA_21_P0003403	2.28e-06	0.498244	mRNA	XLOC_003693
LNCA_23_P56213	1.63e-08	3.9099	mRNA	GRAMD1A
LNCA_33_P3322046	2.65e-06	0.487623	mRNA
LNCA_33_P3400273	0.00063964	2.03049	mRNA	SELL
LNCA_23_P63026	1.83e-07	2.1717	mRNA	LGALS8
LNCA_33_P3242416	3.87e-05	0.479214	mRNA
LNCA_23_P218505	0.00131019	0.495812	mRNA	LHB
LNCA_24_P406132	3.39e-10	2.75941	mRNA	MAPK13
LNCA_23_P125204	7.17e-07	0.346729	mRNA	OR10G8
LNCA_24_P41570	4.27e-08	2.13408	mRNA	H2AFZ
LNCA_23_P150876	2.14e-07	2.28065	mRNA	VPS37B
LNCA_32_P205110	0.000411256	0.337294	mRNA	FOXC1
LNCA_33_P3293362	2.68e-07	6.03188	mRNA	1-Mar
LNCA_32_P57057	1.21e-05	2.35617	mRNA	USP15
LNCA_21_P0000944	2.45e-08	0.3099	mRNA	XLOC_000035
LNCA_21_P0013567	7.31e-09	2.99087	mRNA	RBPJ
LNCA_33_P3238997	2.15e-07	2.91817	mRNA	AGFG1
LNCA_23_P62967	3.21e-06	2.47533	mRNA	DISC1
LNCA_23_P59772	1.1e-06	0.401264	mRNA	CLCN1
LNCA_23_P388433	1.24e-05	2.00483	mRNA	C4orf3
LNCA_21_P0002661	5.91e-07	0.462538	mRNA	XLOC_002094
LNCA_23_P155765	4.57e-05	4.36637	mRNA	HMGB2
LNCA_33_P3212112	2.02e-07	2.11807	mRNA	SLC12A6
LNCA_23_P127697	2.63e-05	0.318115	mRNA
LNCA_21_P0012287	1.58e-08	0.375853	mRNA	XLOC_l2_009469
LNCA_24_P515319	2.19e-06	0.448731	mRNA	FAM90A7
LNCA_23_P40174	7e-07	5.29892	mRNA	MMP9
LNCA_32_P73217	9.01e-08	2.2114	mRNA	TMEM167B
LNCA_33_P3323699	0.000336945	0.351548	mRNA	NPPA
LNCA_23_P416711	0.00379658	2.46252	mRNA	ST6GALNAC3
LNCA_33_P3242778	0.000334205	0.411733	mRNA	LOC100129888
LNCA_23_P208866	1.15e-06	2.83672	mRNA	GMFG
LNCA_24_P40721	1.49e-06	0.260466	mRNA	SPTLC3
LNCA_23_P105571	3.56e-08	2.71337	mRNA	CHPT1
LNCA_33_P3284508	0.000481842	2.06301	mRNA	CD14
LNCA_23_P2814	1.21e-08	0.380855	mRNA	SMAD9
LNCA_32_P470728	2.5e-07	0.44578	mRNA	GSX1
LNCA_21_P0002422	3.49e-06	4.41272	mRNA	XLOC_002049
LNCA_24_P286054	1.07e-05	2.7259	mRNA	ZFYVE16
LNCA_23_P428999	1.9e-08	2.17734	mRNA	NCOA2
LNCA_33_P3337569	3.32e-08	0.228673	mRNA	C4orf40
LNCA_24_P277295	5.45e-07	2.28595	mRNA	RAB43
LNCA_33_P3262024	1.39e-07	0.445596	mRNA	ATMIN
LNCA_33_P3417305	1.92e-06	2.57871	mRNA
LNCA_33_P3489646	0.000112215	2.07251	mRNA	SPI1
LNCA_24_P329353	7.18e-07	2.52503	mRNA	ORAI2
LNCA_33_P3365072	4.79e-05	0.45056	mRNA	LCE6A
LNCA_23_P334864	1.93e-09	4.39857	mRNA	FAM126B
LNCA_23_P97623	4.35e-14	2.19508	mRNA	RRAGC
LNCA_23_P170857	8.19e-05	2.74757	mRNA	IL1RAP
LNCA_23_P75516	1.04e-08	2.6983	mRNA	PPFIA1
LNCA_23_P145863	1.35e-05	2.38722	mRNA	S100A11
LNCA_24_P401870	1.19e-10	3.51096	mRNA	C9orf139
LNCA_21_P0000108	1.48e-06	0.466514	mRNA	MTRNR2L8
LNCA_21_P0007168	4.73e-09	0.484073	mRNA	XLOC_009021
LNCA_33_P3412847	0.000268715	0.474007	mRNA
LNCA_33_P3229328	5.08e-05	0.430075	mRNA	NBPF6
LNCA_21_P0012077	3.79e-12	3.07449	mRNA	XLOC_l2_008203
LNCA_21_P0011802	1.19e-05	0.386914	mRNA	XLOC_l2_007310
LNCA_24_P51683	1.21e-07	0.414621	mRNA	CDK5R2
LNCA_33_P3334404	3.74e-06	0.397338	mRNA	CA6
LNCA_24_P46093	3.99e-08	2.74468	mRNA	SLC6A6
LNCA_33_P3287716	3.42e-06	0.485357	mRNA	LOC100129292
LNCA_24_P270033	1.28e-05	2.2183	mRNA	MPZL3
LNCA_23_P167789	1.02e-07	2.53864	mRNA	FAM53C
LNCA_33_P3223397	0.000347325	0.452013	mRNA
LNCA_33_P3289356	2.27e-06	2.54589	mRNA	CD58
LNCA_23_P159671	9.38e-08	2.1571	mRNA	PHKA2
LNCA_33_P3215412	4.78e-05	0.478378	mRNA	C2CD4C
LNCA_23_P371824	1.13e-05	2.32145	mRNA	TUFT1
LNCA_23_P2041	9.26e-06	2.50907	mRNA	MICALCL
LNCA_23_P167005	2.84e-06	3.29077	mRNA	GPR160
LNCA_24_P202567	8.25e-05	4.03656	mRNA	ITPKC
LNCA_23_P141394	7.85e-07	2.345	mRNA	WIPI1
LNCA_23_P101829	2.22e-07	2.48525	mRNA	LPAR2
LNCA_32_P226786	4.97e-07	3.97818	mRNA	FAM126B
LNCA_23_P26759	2.06e-08	2.29413	mRNA	CANT1
LNCA_23_P161152	1.39e-08	3.28168	mRNA	PDSS1
LNCA_23_P129058	6.67e-08	2.02748	mRNA	USP8
LNCA_33_P3352578	6.58e-07	10.1219	mRNA	CLEC4D
LNCA_23_P78835	1.67e-07	2.06343	mRNA	ZNF787
LNCA_33_P3326235	0.00201964	2.04418	mRNA	HBM
LNCA_23_P23006	3.09e-07	2.0261	mRNA	NRD1
LNCA_32_P219942	0.000139443	0.487721	mRNA	ZIC5
LNCA_23_P305759	4.52e-06	2.42822	mRNA	ABHD3
LNCA_24_P270814	3.04e-09	2.62892	mRNA	CRK
LNCA_33_P3251332	2.52e-07	2.31211	mRNA	HEATR5A
LNCA_19_P00319201	4.44e-06	2.46274	mRNA	CCDC149
LNCA_32_P190461	8.51e-07	2.72057	mRNA
LNCA_33_P3247372	1.6e-08	2.90073	mRNA	LOC400927
LNCA_33_P3258977	3.38e-06	8.61011	mRNA	CLEC4D
LNCA_33_P3348752	4.71e-09	0.456643	mRNA	HSPH1
LNCA_33_P3393821	9.64e-10	3.53844	mRNA	C1R
LNCA_23_P49412	3.37e-07	2.15959	mRNA	PRR14
LNCA_33_P3316273	0.0301596	3.20248	mRNA	CCL3
LNCA_23_P98085	8.44e-07	2.59271	mRNA	PTEN
LNCA_23_P208706	2.77e-07	2.36605	mRNA	BAX
LNCA_33_P3288491	5.19e-06	0.420238	mRNA	KLHL38
LNCA_33_P3329344	4.18e-09	0.494623	mRNA	FASN
LNCA_23_P78571	4.59e-07	0.4079	mRNA	COX6B2
LNCA_19_P00810040	5.16e-05	2.01406	mRNA	MDM2
LNCA_24_P244410	9.56e-06	2.05945	mRNA	C11orf51
LNCA_23_P156697	1.04e-06	2.29227	mRNA	ABHD16A
LNCA_23_P162300	2.36e-07	6.76466	mRNA	IRAK3
LNCA_23_P135184	9.48e-07	2.14868	mRNA	RALGDS
LNCA_21_P0011057	2.28e-06	0.462434	mRNA	OTOGL
LNCA_23_P426989	8.86e-06	2.36426	mRNA	SH3BP5L
LNCA_33_P3298617	3.55e-06	0.492173	mRNA
LNCA_33_P3389773	3.03e-11	0.229277	mRNA
LNCA_23_P115331	2.87e-05	0.43251	mRNA	AHDC1
LNCA_21_P0013431	2.36e-08	0.314384	mRNA	LOC100506447
LNCA_33_P3219434	2.8e-05	0.484943	mRNA	2-Mar
LNCA_33_P3323101	4.92e-07	2.16621	mRNA	ZNF33A
LNCA_19_P00316911	1.41e-09	3.35881	mRNA	XLOC_001688
LNCA_21_P0011331	1.5e-06	0.481513	mRNA	CSPG4
LNCA_23_P256342	1.3e-07	2.41796	mRNA	SNX13
LNCA_33_P3338853	0.000796088	3.64905	mRNA	HTATSF1P2
LNCA_24_P357709	6.24e-10	2.028	mRNA	VPS8
LNCA_21_P0007848	2.28e-07	0.420554	mRNA	XLOC_009858
LNCA_33_P3320217	3.37e-07	0.281508	mRNA	ADCY2
LNCA_32_P220715	6.42e-08	2.21288	mRNA	MAP1LC3B
LNCA_24_P252043	1.43e-05	2.09993	mRNA	PTP4A1
LNCA_33_P3360227	7.63e-07	0.499321	mRNA
LNCA_33_P3474859	9.64e-06	2.11823	mRNA	LOC203274
LNCA_33_P3296442	2.25e-05	0.348682	mRNA
LNCA_33_P3363395	1.52e-07	3.05028	mRNA
LNCA_21_P0001992	1e-06	0.402545	mRNA	XLOC_001947
LNCA_24_P270144	2.57e-08	2.67754	mRNA	CD63
LNCA_23_P69109	0.00148154	2.477	mRNA	PLSCR1
LNCA_33_P3371718	7.36e-05	2.2695	mRNA	SAT1
LNCA_33_P3702055	3.67e-08	3.09957	mRNA	SLC11A1
LNCA_23_P140527	9.92e-06	0.452739	mRNA	FOXB1
LNCA_33_P3252394	2.34e-05	2.48083	mRNA	GADD45G
LNCA_33_P3343872	2.1e-06	2.40987	mRNA	SIRPG
LNCA_33_P3302662	1.15e-07	2.86499	mRNA	TLE4
LNCA_23_P156289	0.000344997	0.35504	mRNA	OSMR
LNCA_33_P3267160	2.74e-10	2.69114	mRNA
LNCA_23_P131435	9.1e-06	2.18977	mRNA	CD302
LNCA_33_P3392087	0.000530476	0.404049	mRNA	IDUA
LNCA_23_P43490	5.4e-06	0.495712	mRNA	CDKN2A
LNCA_21_P0010731	0.00160474	0.332446	mRNA	XLOC_l2_000465
LNCA_23_P215828	2.49e-08	0.417692	mRNA	CYP3A43
LNCA_33_P3295423	2.68e-07	2.19127	mRNA	ZXDC
LNCA_23_P29851	6.5e-07	2.26541	mRNA	LRPAP1
LNCA_33_P3242829	8.78e-08	2.05322	mRNA	PKN2
LNCA_33_P3410194	2.65e-09	2.17235	mRNA	H3F3B
LNCA_21_P0006027	3.32e-08	0.444532	mRNA	XLOC_007451
LNCA_23_P74716	8.97e-09	2.17544	mRNA	DEDD
LNCA_24_P377124	1.16e-08	0.464146	mRNA	THPO
LNCA_23_P104741	2.52e-07	0.37841	mRNA	KIRREL3
LNCA_33_P3257891	0.000568722	0.426988	mRNA	GSTA3
LNCA_23_P112241	0.00118232	2.25139	mRNA	DNAJB5
LNCA_24_P148717	0.00142459	2.05867	mRNA	CCR1
LNCA_23_P77859	3.61e-09	3.78733	mRNA	TMEM88
LNCA_33_P3404014	3.04e-07	3.67698	mRNA	C20orf107
LNCA_33_P3402963	3.41e-05	0.487262	mRNA	DPRX
LNCA_33_P3404336	1.86e-10	0.479016	mRNA
LNCA_23_P341065	2.27e-06	2.02106	mRNA	SELO
LNCA_24_P281636	4.57e-05	0.481204	mRNA
LNCA_21_P0001892	2.74e-06	0.446776	mRNA	XLOC_001605
LNCA_33_P3260669	1.68e-07	3.27054	mRNA	STK3
LNCA_33_P3369760	2.6e-06	2.17174	mRNA	GLIPR2
LNCA_33_P3262167	2.71e-08	0.416892	mRNA
LNCA_21_P0001800	0.000101015	0.292749	mRNA	XLOC_002487
LNCA_24_P88079	1.48e-05	0.424034	mRNA	MUC6
LNCA_33_P3226550	1.14e-08	0.470735	mRNA	SLC4A8
LNCA_33_P3465703	5.4e-09	0.491463	mRNA	SNORA60
LNCA_33_P3258320	3.67e-07	0.493877	mRNA
LNCA_24_P913716	0.000109526	0.378852	mRNA	B3GNT7
LNCA_33_P3391727	3.6e-06	2.00534	mRNA	SIRT7
LNCA_23_P379071	1.31e-08	3.34592	mRNA	FBXL13
LNCA_21_P0013573	1.95e-06	0.330379	mRNA	XLOC_l2_014821
LNCA_33_P3306624	4.81e-06	0.30221	mRNA	HCRT
LNCA_23_P52676	2.03e-07	2.14301	mRNA	CATSPER1
LNCA_33_P3405904	2.18e-07	2.47887	mRNA
LNCA_33_P3503408	1.52e-08	0.377346	mRNA	LOC221946
LNCA_23_P103690	0.00249322	0.489086	mRNA	FAM189B
LNCA_23_P86751	0.00549254	2.86514	mRNA	ADARB2
LNCA_33_P3260605	1.22e-05	2.54924	mRNA	CTNNAL1
LNCA_23_P121898	2.76e-07	2.11788	mRNA	PARP8
LNCA_33_P3210880	5.09e-10	2.97166	mRNA	ATP7A
LNCA_23_P210210	4.64e-05	2.26365	mRNA	EPAS1
LNCA_23_P84836	3.5e-08	2.15436	mRNA	NPEPPS
LNCA_23_P89601	1.22e-07	0.29848	mRNA	KRT32
LNCA_21_P0000103	0.0123236	0.329684	mRNA	MTRNR2L3
LNCA_23_P4041	7.5e-07	2.18775	mRNA	PCTP
LNCA_23_P42498	3.01e-06	2.14469	mRNA	SNX3
LNCA_33_P3418218	0.00292105	0.309824	mRNA	SEC16B
LNCA_33_P3374258	1.31e-06	0.419853	mRNA	NHLH2
LNCA_23_P330461	2.65e-05	2.70143	mRNA	TMC4
LNCA_24_P239731	2e-07	4.2441	mRNA	B4GALT5
LNCA_23_P206396	2.65e-07	2.97387	mRNA	CKLF
LNCA_23_P13455	6e-08	0.311359	mRNA	OR51A7
LNCA_21_P0011991	5.52e-09	0.407301	mRNA	XLOC_l2_008450
LNCA_23_P313389	3.66e-06	4.33897	mRNA	UGCG
LNCA_24_P937790	2.17e-08	0.482904	mRNA	CCDC166
LNCA_24_P325107	1.49e-08	2.8812	mRNA	FAM160B1
LNCA_33_P3319905	7.49e-06	2.60813	mRNA	TREM1
LNCA_33_P3314192	1.36e-05	2.50177	mRNA	PACSIN2
LNCA_24_P98109	1.47e-05	2.14938	mRNA	SNX10
LNCA_33_P3377399	1.49e-05	0.477276	mRNA
LNCA_33_P3378354	1.15e-05	0.374716	mRNA
LNCA_23_P422778	1.66e-08	0.458554	mRNA	KCNQ2
LNCA_23_P156049	5.85e-08	2.03228	mRNA	HEXB
LNCA_24_P408321	4.64e-07	2.01755	mRNA	OSBPL2
LNCA_23_P51565	3.35e-09	0.349916	mRNA	TNNI1
LNCA_24_P271014	2.14e-09	3.02614	mRNA	PPP4R1
LNCA_24_P194420	2.64e-06	0.462512	mRNA	CCDC134
LNCA_33_P3234794	0.00386967	0.435357	mRNA	ARHGAP40
LNCA_23_P23839	1.02e-05	0.405621	mRNA	LGR6
LNCA_23_P476	0.000257631	2.07065	mRNA	MPZL1
LNCA_33_P3318343	6.43e-09	0.307386	mRNA	CTAG2
LNCA_33_P3261097	1.46e-07	0.463744	mRNA
LNCA_24_P322353	7.63e-05	2.99791	mRNA	PSTPIP2
LNCA_23_P23575	2.3e-07	2.81892	mRNA	SLC39A1
LNCA_33_P3420704	1.15e-05	0.46173	mRNA
LNCA_23_P214222	3.82e-05	2.46954	mRNA	MARCKS
LNCA_33_P3354564	2.75e-07	2.13911	mRNA	GPD2
LNCA_33_P3417281	0.00101137	0.368265	mRNA	MUC4
LNCA_33_P3270315	6.28e-05	2.17694	mRNA
LNCA_21_P0013966	2.58e-08	2.55361	mRNA	CLTC-IT1
LNCA_21_P0001847	9.36e-05	0.480526	mRNA	XLOC_001398
LNCA_33_P3229181	7.07e-08	2.42444	mRNA	SLC12A9
LNCA_23_P85716	8.62e-06	2.3864	mRNA	FCGR2A
LNCA_33_P3368950	8.51e-09	0.446893	mRNA	C5orf65
LNCA_24_P165423	1.75e-06	3.13629	mRNA	RBP7
LNCA_33_P3332865	3.81e-07	2.36179	mRNA	NPEPL1
LNCA_19_P00805625	1.42e-07	3.22694	mRNA	LOC100506190
LNCA_24_P37589	8.83e-07	2.44531	mRNA	ACPP
LNCA_21_P0011428	1.02e-06	0.469756	mRNA	SLC9B1
LNCA_33_P3304819	2.35e-10	0.360788	mRNA
LNCA_21_P0004766	5.56e-09	0.300433	mRNA	XLOC_005782
LNCA_23_P201035	7.37e-08	2.63658	mRNA	GBA
LNCA_23_P134835	0.000100224	4.28496	mRNA	CSGALNACT1
LNCA_24_P920979	9.37e-09	2.24575	mRNA	ASB7
LNCA_23_P44155	4.53e-06	0.482513	mRNA	CD96
LNCA_33_P3255131	2.48e-06	0.344952	mRNA	KCTD19
LNCA_23_P380298	9.29e-05	0.354161	mRNA	ProSAPiP1
LNCA_33_P3225843	4.03e-07	2.56578	mRNA	CCDC149
LNCA_23_P60599	0.00398881	0.448443	mRNA	UGT1A6
LNCA_24_P223124	3.26e-06	2.52798	mRNA	FNDC3B
LNCA_24_P7652	2.26e-09	0.427367	mRNA	MAP7D2
LNCA_24_P43391	1.04e-10	2.97227	mRNA	TMEM165
LNCA_33_P3353948	7.55e-08	0.494762	mRNA
LNCA_33_P3330353	0.000385998	2.00323	mRNA	MOSPD1
LNCA_23_P111583	0.00421332	2.03891	mRNA	CD36
LNCA_24_P416346	1.56e-06	0.473737	mRNA	ETV4
LNCA_24_P289383	0.000266959	2.66984	mRNA	CHD7
LNCA_23_P361014	0.000756598	2.49718	mRNA	TSHZ3
LNCA_32_P31618	4.08e-06	2.22158	mRNA	GSR
LNCA_23_P143987	1.83e-07	2.02228	mRNA	ATG7
LNCA_23_P168551	1.99e-06	0.264737	mRNA	SLC29A4
LNCA_24_P941988	2.34e-06	2.0338	mRNA	SPAST
LNCA_23_P203743	1.2e-06	2.73282	mRNA	GAB2
LNCA_24_P334718	1.67e-08	5.22879	mRNA	GPR141
LNCA_24_P65864	3.93e-08	2.63161	mRNA	NSFL1C
LNCA_23_P217845	2.4e-07	0.385882	mRNA	RGS16
LNCA_23_P50710	0.000220012	2.35583	mRNA	CYP4F2
LNCA_24_P686965	1.1e-07	0.43106	mRNA	SH2D5
LNCA_23_P42897	1.35e-08	5.61435	mRNA	MGAM
LNCA_33_P3246505	2.96e-10	2.12552	mRNA	MAP3K8
LNCA_33_P3226135	5.1e-07	0.475757	mRNA
LNCA_23_P346006	6.06e-09	2.66348	mRNA	CCPG1
LNCA_21_P0000098	2.29e-07	2.02163	mRNA	CARD8
LNCA_33_P3297444	1.64e-06	2.72476	mRNA	ABTB1
LNCA_33_P3305790	0.00513768	0.471358	mRNA	NOS3
LNCA_23_P314789	3.1e-08	0.47444	mRNA	ZDHHC19
LNCA_23_P161507	1.16e-06	2.5088	mRNA	MTL5
LNCA_23_P327361	3.23e-06	2.12889	mRNA	DMXL2
LNCA_23_P250118	9.63e-07	2.31289	mRNA	HSPBAP1
LNCA_23_P502350	6.81e-07	2.08533	mRNA	RFX2
LNCA_23_P336644	3.26e-11	2.5219	mRNA	TOR1AIP2
LNCA_23_P426305	2.16e-05	2.25844	mRNA	AOC3
LNCA_23_P90804	1.88e-07	2.23029	mRNA	MAP4K4
LNCA_23_P145957	7.3e-05	2.76638	mRNA	TPK1
LNCA_23_P209689	6.47e-13	2.46733	mRNA	ROCK2
LNCA_24_P300777	1.82e-05	2.15672	mRNA	ADAM8
LNCA_33_P3366456	3.14e-10	0.494739	mRNA	HDGFL1
LNCA_24_P345451	0.000667549	2.42834	mRNA	CYBRD1
LNCA_21_P0010169	1.05e-06	0.495736	mRNA	XLOC_013982
LNCA_24_P178148	0.00013151	0.467445	mRNA
LNCA_33_P3231363	2.65e-06	0.412911	mRNA	STK3
LNCA_23_P364355	0.000763513	0.270572	mRNA
LNCA_24_P347880	2.05e-06	0.431104	mRNA	ALOXE3
LNCA_23_P63816	1.23e-07	2.87343	mRNA	NRBF2
LNCA_21_P0000092	2.51e-08	2.22682	mRNA	ZBED6
LNCA_23_P388146	1.05e-07	2.25091	mRNA	ZNF587
LNCA_23_P420218	1.91e-06	0.430137	mRNA	CACNG8
LNCA_23_P363313	8.85e-06	0.456071	mRNA	SLC16A11
LNCA_23_P58953	1.37e-06	4.85153	mRNA	NQO2
LNCA_23_P35399	8.97e-06	2.11458	mRNA	ANXA11
LNCA_33_P3290667	2.77e-09	2.13667	mRNA	SELT
LNCA_21_P0005271	2.45e-06	0.465723	mRNA	XLOC_006314
LNCA_21_P0012528	3.62e-10	5.44625	mRNA	PCMTD2
LNCA_32_P179746	1.09e-05	2.13191	mRNA
LNCA_23_P401106	0.000156027	2.25159	mRNA	PDE2A
LNCA_23_P85218	5.47e-10	0.265653	mRNA	SOX3
LNCA_33_P3413958	1.62e-07	0.432697	mRNA	OR7E47P
LNCA_33_P3324687	8.26e-06	0.233646	mRNA
LNCA_23_P46222	8.47e-06	0.483461	mRNA	TRIM46
LNCA_23_P75764	2.83e-06	0.492394	mRNA	OR5A1
LNCA_21_P0000047	3.93e-08	3.66097	mRNA	DISC1
LNCA_23_P203949	7.67e-11	0.48599	mRNA	DDX11
LNCA_24_P330385	3.5e-05	0.489596	mRNA	SLC22A17
LNCA_23_P216915	1.02e-07	0.348244	mRNA	NR5A1
LNCA_24_P42389	6.16e-05	0.490777	mRNA	OTUD6A
LNCA_23_P6201	9.84e-09	0.430887	mRNA	LIPI
LNCA_21_P0010882	5.61e-06	0.412596	mRNA	XLOC_l2_001986
LNCA_23_P60565	5.58e-06	2.73581	mRNA	ZNF354A
LNCA_33_P3278868	2.13e-06	2.3531	mRNA	HEATR5A
LNCA_33_P3407631	3.08e-09	0.430107	mRNA
LNCA_33_P3394075	1.95e-09	3.4251	mRNA	RIT1
LNCA_23_P165355	2.37e-09	0.414858	mRNA	FARSB
LNCA_24_P391260	6.63e-06	2.39186	mRNA	PTTG1IP
LNCA_21_P0002802	3.89e-08	0.349983	mRNA	XLOC_002913
LNCA_23_P154306	7.53e-07	2.01018	mRNA	TANK
LNCA_23_P126757	1.44e-07	2.04278	mRNA	INTS3
LNCA_23_P153236	9.98e-06	2.28392	mRNA	CHMP2A
LNCA_23_P165707	5.03e-08	2.14576	mRNA	LYG1
LNCA_23_P77833	1.4e-06	2.35548	mRNA	PGS1
LNCA_19_P00324582	0.00830699	0.3475	mRNA
LNCA_33_P3406873	0.0298985	0.452872	mRNA	NFASC
LNCA_23_P124760	0.0018002	0.397842	mRNA	MED24
LNCA_24_P333019	1.46e-07	2.24717	mRNA	RNF24
LNCA_21_P0008601	9.52e-05	0.380249	mRNA	XLOC_011188
LNCA_33_P3395321	2.71e-06	2.92197	mRNA	HN1
LNCA_21_P0014026	4.79e-07	2.30596	mRNA	IGANRP
LNCA_23_P61674	1.64e-06	2.47126	mRNA	CLK4
LNCA_23_P110712	7.69e-06	3.50138	mRNA	DUSP1
LNCA_33_P3362900	7.62e-07	2.01791	mRNA	LOC375190
LNCA_33_P3386487	0.000135847	0.499148	mRNA
LNCA_33_P3240497	1.08e-08	0.16026	mRNA
LNCA_23_P82286	4.8e-05	0.323455	mRNA	ZAN
LNCA_33_P3259775	9.07e-08	3.08432	mRNA	DOCK5
LNCA_33_P3223497	1.38e-05	2.4789	mRNA	FRY
LNCA_21_P0013557	2.12e-06	0.497895	mRNA	C4orf27
LNCA_33_P3227990	6.2e-08	2.88311	mRNA	MBP
LNCA_23_P97309	9.08e-09	2.10902	mRNA	CASP9
LNCA_33_P3229241	1.12e-06	3.88726	mRNA	HIST2H2BF
LNCA_33_P3396389	2.47e-09	7.15045	mRNA	IL1R1
LNCA_33_P3228023	6.89e-06	2.1414	mRNA	SCPEP1
LNCA_23_P395632	4.5e-05	0.415931	mRNA	R3HDML
LNCA_33_P3311750	0.00119969	2.76863	mRNA	CCDC144A
LNCA_19_P00803333	1.64e-07	2.59	mRNA	ZSWIM6
LNCA_33_P3265549	3.54e-05	2.05415	mRNA	SLC19A1
LNCA_33_P3250173	3.83e-05	0.490011	mRNA	IQCJ
LNCA_33_P3361202	1.14e-05	2.14973	mRNA	C1orf96
LNCA_23_P91140	9.86e-07	3.14603	mRNA	PECR
LNCA_23_P121253	0.000860812	2.06473	mRNA	TNFSF10
LNCA_23_P29422	6.14e-08	4.09881	mRNA	GYG1
LNCA_33_P3343727	0.000264697	0.486427	mRNA	CELA3A
LNCA_23_P69493	1.79e-06	2.11438	mRNA	RHOA
LNCA_23_P210330	2.3e-07	2.6981	mRNA	LGALSL
LNCA_19_P00321061	1.12e-05	0.428057	mRNA	LOC100499221
LNCA_33_P3356816	1.4e-06	0.460502	mRNA	LCE1B
LNCA_23_P118306	2.85e-06	0.252136	mRNA	DNAJA3
LNCA_23_P354217	0.000765659	0.458507	mRNA	TMEM151A
LNCA_33_P3244610	4.34e-07	3.24073	mRNA	SIRPD
LNCA_23_P256735	2.85e-06	2.13047	mRNA	PGCP
LNCA_23_P42241	2.52e-06	0.397266	mRNA	OR5V1
LNCA_33_P3258076	9.38e-06	0.480995	mRNA	LOC100129581
LNCA_24_P24972	6.43e-05	0.313588	mRNA
LNCA_21_P0011526	0.000699529	2.64852	mRNA	CCDC144A
LNCA_24_P277657	0.00130459	2.02773	mRNA	GMPR
LNCA_33_P3226560	6.61e-08	0.427903	mRNA
LNCA_32_P2452	0.00324956	5.5194	mRNA	TMTC1
LNCA_33_P3351249	1.98e-07	2.67655	mRNA	CXCL16
LNCA_33_P3352382	9.43e-06	21.6859	mRNA	ARG1
LNCA_24_P419028	1.55e-07	0.390587	mRNA	MOP-1
LNCA_33_P3336148	0.000125793	2.40383	mRNA
LNCA_33_P3372924	5.01e-06	0.452145	mRNA	ADCK3
LNCA_33_P3387561	3.31e-07	0.411475	mRNA	OSCAR
LNCA_24_P58242	0.0235043	0.489222	mRNA
LNCA_23_P74001	7.41e-08	7.58128	mRNA	S100A12
LNCA_33_P3228435	7.62e-07	0.377508	mRNA	FXYD1
LNCA_23_P30950	1.03e-05	7.22312	mRNA	SLC26A8
LNCA_32_P379467	0.00908753	2.25866	mRNA	ISLR2
LNCA_33_P3259522	1.9e-07	0.479546	mRNA	CDCP2
LNCA_23_P128215	3.33e-10	0.436989	mRNA	SOCS2
LNCA_32_P4595	4.31e-05	0.260877	mRNA	SGCD
LNCA_23_P138271	7.91e-09	2.51711	mRNA	ARL8A
LNCA_23_P5441	2.01e-09	2.45667	mRNA	ABCB6
LNCA_33_P3390918	1.77e-06	0.45925	mRNA	FSD2
LNCA_24_P301837	1.14e-05	0.424144	mRNA	HRH3
LNCA_24_P163920	1.87e-08	2.43249	mRNA	FAR1
LNCA_23_P84995	2.37e-08	0.437469	mRNA	MTMR8
LNCA_19_P00804120	8.74e-06	0.420227	mRNA
LNCA_23_P6914	3.68e-07	2.18755	mRNA	OSBPL11
LNCA_24_P278192	0.000219866	0.469418	mRNA	AK1
LNCA_24_P64100	7.09e-07	3.22139	mRNA
LNCA_33_P3286929	0.0155983	2.03317	mRNA
LNCA_23_P124927	9.84e-07	2.5902	mRNA	RGS14
LNCA_23_P201047	0.000114836	0.458825	mRNA	THBS3
LNCA_33_P3235098	1.91e-12	0.448074	mRNA	FAM22D
LNCA_33_P3242264	1.84e-10	0.463649	mRNA	NSUN4
LNCA_21_P0009540	8.42e-08	0.389975	mRNA	XLOC_012810
LNCA_23_P110212	2.98e-07	5.53418	mRNA	ACSL1
LNCA_21_P0000052	7.51e-07	3.87406	mRNA	DISC1
LNCA_33_P3361711	2.35e-06	0.448068	mRNA
LNCA_23_P34510	1.83e-06	4.24155	mRNA	PHC2
LNCA_33_P3297285	3.33e-08	0.454183	mRNA	LOC100131667
LNCA_23_P67127	1.1e-06	0.445025	mRNA	TMEM145
LNCA_24_P244356	7.66e-07	2.20772	mRNA	NLRX1
LNCA_24_P364807	8.03e-05	2.26074	mRNA	LPCAT2
LNCA_33_P3319281	6.51e-09	0.386655	mRNA	ANO7
LNCA_23_P212354	0.000962449	2.48519	mRNA	CCR2
LNCA_24_P134789	1.45e-06	0.453107	mRNA	KRTAP10-10
LNCA_33_P3368471	6.66e-08	0.414413	mRNA	NT5DC1
LNCA_23_P86917	3.92e-08	2.06679	mRNA	FADD
LNCA_33_P3544880	6.68e-05	2.36035	mRNA	LOC142937
LNCA_24_P925664	9.78e-08	2.78706	mRNA	MDM2
LNCA_21_P0006014	6.34e-08	2.70165	mRNA	XLOC_007388
LNCA_33_P3414017	1.66e-11	0.488943	mRNA
LNCA_23_P32253	2.66e-07	3.47277	mRNA	NFIL3
LNCA_21_P0007137	3.93e-06	0.384562	mRNA	XLOC_009023
LNCA_24_P26897	1.76e-09	2.89944	mRNA	INPP5A
LNCA_33_P3389872	3.1e-05	2.37325	mRNA	LRRK2
LNCA_23_P123727	9e-07	2.40424	mRNA	ZCCHC6
LNCA_23_P66328	4.22e-06	0.489718	mRNA	ACSM2B
LNCA_33_P3327158	0.000130335	0.476461	mRNA	LOC100131432
LNCA_24_P310616	1.22e-06	2.11382	mRNA	SLC35A2
LNCA_33_P3241591	6.51e-10	0.428147	mRNA	LOC100131864
LNCA_23_P58763	1.52e-07	2.44729	mRNA	PELO
LNCA_33_P3306085	2.29e-06	0.416059	mRNA	RAD51AP2
LNCA_24_P83379	1.37e-07	3.91219	mRNA	WDFY3
LNCA_33_P3347161	4.35e-08	2.22523	mRNA	TBL1X
LNCA_33_P3378545	2.16e-08	0.431106	mRNA
LNCA_21_P0011450	1.35e-07	3.46537	mRNA	XLOC_l2_005352
LNCA_24_P56689	0.000113721	0.382584	mRNA	ZNF205
LNCA_23_P218463	1.54e-06	2.04881	mRNA	SERTAD1
LNCA_23_P31376	9.38e-07	0.438356	mRNA	LRRN3
LNCA_23_P104798	7.28e-07	2.62379	mRNA	IL18
LNCA_33_P3385785	6.94e-08	8.17286	mRNA	S100A12
LNCA_23_P211445	7.32e-07	3.63445	mRNA	LIMK2
LNCA_32_P192474	0.000600498	0.331911	mRNA	PRRT1
LNCA_23_P35055	0.00626366	0.482308	mRNA	NPHS2
LNCA_23_P39602	5.95e-09	2.34813	mRNA	NCOA1
LNCA_19_P00315718	2.27e-06	2.08662	mRNA	FAM200B
LNCA_23_P146811	1.17e-07	2.29388	mRNA	FBXO38
LNCA_33_P3384913	4.21e-08	3.42292	mRNA
LNCA_23_P75647	3.89e-09	0.418083	mRNA	HYOU1
LNCA_23_P125772	1.53e-07	0.448346	mRNA	SRPK3
LNCA_23_P152791	1.91e-08	2.63575	mRNA	SLC16A6
LNCA_21_P0013266	2.84e-07	2.79473	mRNA	XLOC_l2_013594
LNCA_33_P3228355	8.66e-07	3.22212	mRNA	ERV3-1
LNCA_23_P23221	1.34e-07	5.83165	mRNA	GADD45A
LNCA_21_P0003706	6.16e-07	0.462759	mRNA	MGC39584
LNCA_33_P3235132	0.00264472	0.366028	mRNA	LOC400968
LNCA_23_P409553	5.03e-08	2.52474	mRNA	PPM1A
LNCA_24_P298174	2.28e-08	2.18488	mRNA	CBX1
LNCA_24_P251221	1.11e-06	2.79444	mRNA	PPP2R5A
LNCA_33_P3382177	1.56e-05	2.57928	mRNA	TIMP2
LNCA_33_P3251876	2.55e-05	9.722	mRNA	IL18R1
LNCA_24_P227211	2.21e-06	0.425567	mRNA	KLC2
LNCA_23_P68505	2.65e-07	2.0623	mRNA	C20orf177
LNCA_23_P120822	2.44e-06	0.35966	mRNA	UPB1
LNCA_32_P101844	2.35e-08	2.79874	mRNA
LNCA_33_P3224250	2.83e-08	0.373952	mRNA	CLCC1
LNCA_23_P78563	5.79e-07	2.28344	mRNA	UBL5
LNCA_21_P0000099	2.86e-08	0.49663	mRNA	CLDN7
LNCA_23_P7412	0.0135949	4.03414	mRNA	BTNL8
LNCA_33_P3293925	6.13e-06	0.492943	mRNA	CXorf36
LNCA_32_P112623	2.5e-08	4.50146	mRNA	FAM27E3
LNCA_23_P397238	4.12e-06	3.04995	mRNA	FKBP1A
LNCA_24_P84873	9.79e-09	2.06859	mRNA
LNCA_33_P3414312	4.29e-09	2.34021	mRNA	USP6
LNCA_33_P3551349	2.51e-07	2.39762	mRNA	LOC439911
LNCA_24_P11436	3.87e-06	0.473582	mRNA	TTC22
LNCA_33_P3226557	0.000313549	0.412109	mRNA	PRR23B
LNCA_23_P122724	4.21e-06	3.74273	mRNA	VNN2
LNCA_23_P41664	1.21e-06	5.4807	mRNA	LRRC70
LNCA_23_P256107	3.6e-07	2.46363	mRNA	HPSE
LNCA_21_P0012738	2.94e-07	0.373873	mRNA	XLOC_l2_010831
LNCA_24_P99838	6.79e-06	2.26149	mRNA	ZNF223
LNCA_21_P0003332	0.0126511	0.467705	mRNA	XLOC_003444
LNCA_23_P84910	3.21e-06	0.418981	mRNA	ZNF157
LNCA_23_P346376	5.44e-08	0.486983	mRNA	P2RY10
LNCA_23_P201711	0.000219109	2.086	mRNA	S100A6
LNCA_33_P3562537	0.000460702	0.374159	mRNA	RET
LNCA_23_P158829	2.47e-07	2.22577	mRNA	ARRB2
LNCA_23_P306507	2.2e-10	2.08177	mRNA	KRAS
LNCA_33_P3351120	3.72e-08	2.53395	mRNA	TXNRD1
LNCA_23_P65455	7.02e-10	4.91336	mRNA	HAUS4
LNCA_33_P3253574	4.93e-08	0.498844	mRNA	OR8B3
LNCA_33_P3405754	0.000464886	0.430888	mRNA	CEP104
LNCA_32_P148796	1.64e-07	2.66592	mRNA	UBXN2B
LNCA_23_P129246	2.97e-05	2.04647	mRNA	PLEKHO2
LNCA_33_P3691916	0.000190853	2.08705	mRNA	FAM13A
LNCA_32_P178945	0.000792343	2.99665	mRNA	YOD1
LNCA_33_P3276718	1.62e-05	2.31407	mRNA	HGF
LNCA_19_P00320872	4.18e-07	0.475341	mRNA	Q4E7A0
LNCA_23_P214627	8.27e-05	2.09599	mRNA	AIF1
LNCA_21_P0002895	3.55e-07	0.402703	mRNA	XLOC_003298
LNCA_23_P124003	1.98e-05	0.469439	mRNA	P2RX2
LNCA_24_P916614	8.51e-09	2.57311	mRNA	PTBP3
LNCA_24_P373286	2.47e-07	2.0925	mRNA	CCP110
LNCA_23_P107775	7.56e-10	0.443939	mRNA	TMEM190
LNCA_33_P3310296	6.48e-08	0.487111	mRNA	PKIG
LNCA_21_P0010979	1.69e-05	0.440528	mRNA	XLOC_l2_002351
LNCA_33_P3337154	1.14e-07	3.26683	mRNA
LNCA_33_P3236177	1.03e-06	3.82655	mRNA	ANG
LNCA_23_P376172	1.66e-06	0.474603	mRNA	C1orf64
LNCA_33_P3215953	2.66e-05	2.42851	mRNA	MPZL1
LNCA_23_P56736	0.000792065	0.454785	mRNA	TUBA3D
LNCA_33_P3222501	1.05e-07	4.16357	mRNA	FAM157A
LNCA_23_P60296	2.3e-06	2.10972	mRNA	OSTF1
LNCA_33_P3275055	2.3e-07	8.60275	mRNA	ST6GALNAC3
LNCA_33_P3384562	1.27e-08	2.69064	mRNA	PDLIM7
LNCA_33_P3266489	1.63e-08	0.338467	mRNA	OR13H1
LNCA_33_P3396972	4.26e-08	0.463879	mRNA	LOC100129113
LNCA_33_P3399571	0.000107952	5.70754	mRNA	VNN1
LNCA_21_P0010794	2.32e-07	2.78156	mRNA	XLOC_l2_001399
LNCA_21_P0001876	2.88e-10	4.9854	mRNA	XLOC_001517
LNCA_23_P106194	3.5e-07	3.55668	mRNA	FOS
LNCA_24_P288685	9.76e-06	2.94134	mRNA	IL13RA1
LNCA_23_P55917	4.63e-05	0.482903	mRNA	SYT3
LNCA_33_P3420792	1.06e-06	2.37913	mRNA	PDAP1
LNCA_33_P3353330	0.00040183	0.315935	mRNA
LNCA_24_P346604	7.22e-08	2.27872	mRNA	UBE2W
LNCA_23_P303317	1.54e-06	2.00196	mRNA	ZXDC
LNCA_23_P201287	6.75e-08	3.08203	mRNA	KIF1B
LNCA_33_P3417765	2.01e-07	0.410569	mRNA	KLHDC7A
LNCA_23_P62659	0.000104946	2.13782	mRNA	PPT1
LNCA_23_P326157	2.96e-08	0.33341	mRNA	GAL3ST2
LNCA_33_P3386132	0.000726412	0.439412	mRNA	C2orf49
LNCA_24_P192914	0.000189616	2.03848	mRNA	AMICA1
LNCA_23_P133814	7.88e-05	2.12805	mRNA	HIST1H3C
LNCA_23_P329261	0.00023479	2.43922	mRNA	KCNJ2
LNCA_23_P80377	5.1e-07	2.31164	mRNA	PACSIN2
LNCA_33_P3388815	4.74e-06	2.37615	mRNA	FPGT
LNCA_23_P18490	2.84e-09	2.49047	mRNA	MAEA
LNCA_23_P159101	1.74e-08	2.20376	mRNA	SNRNP35
LNCA_23_P200493	0.000122406	2.14639	mRNA	LBR
LNCA_33_P3382157	2.35e-06	2.42149	mRNA	PICALM
LNCA_21_P0011806	0.00116718	0.436675	mRNA	WBP1
LNCA_33_P3316983	1.89e-05	2.04429	mRNA	BBIP1
LNCA_33_P3418321	7.81e-07	0.464098	mRNA
LNCA_33_P3249818	2.36e-07	0.341403	mRNA	CEACAM18
LNCA_23_P117582	0.000195657	2.24932	mRNA	JDP2
LNCA_23_P145718	7.07e-08	2.25086	mRNA	AOAH
LNCA_23_P16915	6.33e-07	3.573	mRNA	QPCT
LNCA_24_P340679	1.54e-07	2.09493	mRNA	PPIA
LNCA_24_P372625	1.14e-05	2.10674	mRNA	RNF141
LNCA_21_P0013713	2.04e-05	0.393775	mRNA	XLOC_l2_015100
LNCA_33_P3296181	4.93e-05	0.471124	mRNA	CCL3L3
LNCA_23_P79622	1.26e-06	0.422829	mRNA	FKBP7
LNCA_33_P3253460	7.74e-05	0.461893	mRNA	LOC100130654
LNCA_23_P105747	8.75e-08	2.16365	mRNA	APPL2
LNCA_23_P3014	2.38e-05	2.15784	mRNA	RNASE6
LNCA_33_P3367615	1.97e-08	2.44731	mRNA	KLF6
LNCA_33_P3789327	1.01e-11	0.344627	mRNA	SNORD12B
LNCA_33_P3228612	1.5e-06	3.10022	mRNA	CACNA1E
LNCA_23_P146084	1.93e-07	2.00243	mRNA	GSR
LNCA_23_P13914	8.75e-08	0.495994	mRNA	DHX37
LNCA_23_P21134	3.21e-07	2.58736	mRNA	DDIT3
LNCA_24_P631848	1.08e-06	0.235011	mRNA	LOC100132147
LNCA_33_P3311551	6.6e-09	3.63976	mRNA	WLS
LNCA_23_P15798	5.01e-06	0.431029	mRNA	KRTAP4-12
LNCA_33_P3421163	1.05e-06	2.46495	mRNA	TP53INP1
LNCA_33_P3272663	1.14e-06	0.40901	mRNA
LNCA_33_P3246950	0.00441814	0.431426	mRNA
LNCA_21_P0008201	8.1e-09	0.357178	mRNA	XLOC_010695
LNCA_23_P342709	3.81e-07	0.368932	mRNA	FBXO15
LNCA_23_P58266	0.0115237	4.11802	mRNA	S100P
LNCA_23_P148737	0.000482584	3.19203	mRNA	MYBPH
LNCA_23_P30995	1.96e-07	2.60667	mRNA	CYB5R4
LNCA_23_P208482	2.54e-05	0.408386	mRNA	CLEC4M
LNCA_23_P86411	1.11e-07	0.383202	mRNA	MYO3A
LNCA_21_P0010921	0.0013295	0.35063	mRNA	XLOC_l2_001592
LNCA_33_P3357470	1.87e-05	2.00833	mRNA	REPS2
LNCA_33_P3370132	2.58e-06	2.23838	mRNA	TNPO3
LNCA_23_P161968	0.000153796	0.281298	mRNA	SLC22A10
LNCA_33_P3366733	5.87e-05	0.195328	mRNA
LNCA_23_P20532	8.71e-07	2.34506	mRNA	CNTNAP3B
LNCA_33_P3396492	3.02e-06	0.423316	mRNA	CDH24
LNCA_24_P921321	5.23e-09	2.66158	mRNA	PTPRJ
LNCA_19_P00320602	6.78e-10	3.34277	mRNA	LOC100506190
LNCA_33_P3588134	7.97e-10	3.54794	mRNA	PANX2
LNCA_23_P404606	2.69e-05	2.01576	mRNA	C5orf41
LNCA_19_P00321342	0.000666355	0.392378	mRNA	XLOC_007290
LNCA_23_P30069	0.0024529	2.06169	mRNA	DDX60L
LNCA_33_P3623118	7.51e-06	2.03366	mRNA	LOC153577
LNCA_23_P157795	0.000269014	2.27752	mRNA	CTNNAL1
LNCA_33_P3244274	0.0108611	2.11055	mRNA	RNF208
LNCA_24_P88800	6.37e-09	2.02235	mRNA	COX7A2L
LNCA_23_P48676	7.47e-08	3.80103	mRNA	PYGL
LNCA_23_P145330	1.42e-05	0.460363	mRNA	CCHCR1
LNCA_23_P156180	8.97e-09	4.08749	mRNA	SLC22A4
LNCA_21_P0000178	5.06e-07	2.97198	mRNA	TREM1
LNCA_23_P213385	3.73e-06	3.4137	mRNA	BASP1
LNCA_23_P333218	8.33e-08	3.82301	mRNA	ERGIC1
LNCA_33_P3391175	1.89e-09	0.444392	mRNA	FLJ44385
LNCA_33_P3334908	5.19e-06	2.30314	mRNA	DHRSX
LNCA_24_P120115	4.19e-08	3.24547	mRNA	CFLAR
LNCA_23_P147918	8.95e-08	0.383577	mRNA	S100A16
LNCA_23_P163467	0.000235523	2.54163	mRNA	C15orf52
LNCA_33_P3267607	0.00129641	2.34178	mRNA	LOC729870
LNCA_23_P259506	1.47e-09	6.16136	mRNA	C5orf32
LNCA_32_P175301	1.09e-05	2.67248	mRNA	DENND3
LNCA_24_P818268	2.83e-05	0.461643	mRNA
LNCA_23_P170534	1.89e-07	2.29826	mRNA	FUT7
LNCA_33_P3212490	4.55e-05	2.32097	mRNA	DICER1
LNCA_33_P3333107	2.17e-06	0.473753	mRNA
LNCA_33_P3238433	0.0010269	0.439224	mRNA	ALDH3A1
LNCA_23_P167559	2.37e-08	2.24866	mRNA	RNF145
LNCA_21_P0009182	2.69e-06	0.472429	mRNA	XLOC_012323
LNCA_21_P0012080	1.06e-08	2.93683	mRNA	XLOC_l2_008203
LNCA_21_P0012043	2.34e-06	0.394112	mRNA	XLOC_l2_007770
LNCA_33_P3381671	0.00301656	3.39065	mRNA	LOC731424
LNCA_24_P52921	2.31e-05	0.483973	mRNA	BCAT1
LNCA_23_P147495	1.14e-10	2.99351	mRNA	BCORL1
LNCA_23_P28090	1.86e-06	2.2219	mRNA	STX10
LNCA_33_P3331237	0.0023497	0.310976	mRNA	G3BP1
LNCA_21_P0002142	8.3e-07	0.441715	mRNA	XLOC_002517
LNCA_24_P935986	2.34e-05	3.96105	mRNA	BCAT1
LNCA_21_P0012051	2.01e-08	4.13529	mRNA	14-Sep
LNCA_23_P34424	1.79e-06	0.427668	mRNA	KCNQ4
LNCA_23_P131139	0.000144192	0.487129	mRNA	DIRC1
LNCA_23_P65262	2.94e-06	2.65516	mRNA	N4BP2L2
LNCA_33_P3362886	3.97e-07	0.453179	mRNA
LNCA_23_P209394	4.64e-08	2.92847	mRNA	CFLAR
LNCA_23_P304304	3.98e-08	0.439265	mRNA	ARSF
LNCA_32_P133670	4.29e-08	2.02215	mRNA	ANP32A
LNCA_24_P287043	0.000137185	2.1954	mRNA	IFITM2
LNCA_23_P81262	1.66e-07	0.227479	mRNA	PCDHB4
LNCA_24_P325520	0.000311616	3.09764	mRNA	SORT1
LNCA_21_P0007638	2.71e-06	0.439853	mRNA	XLOC_009898
LNCA_33_P3333683	6.67e-06	0.409473	mRNA
LNCA_19_P00809624	1.03e-06	2.10737	mRNA	FAM200B
LNCA_33_P3287348	2.97e-05	0.383291	mRNA	CHN2
LNCA_24_P250535	2.1e-06	2.44565	mRNA	TMX4
LNCA_33_P3320538	0.000237238	2.06153	mRNA	NUPL1
LNCA_23_P334845	1.99e-06	2.33669	mRNA	ARHGAP19
LNCA_33_P3244640	9.1e-08	0.42466	mRNA	GRK5
LNCA_23_P259090	1.98e-07	0.392713	mRNA	NUDT12
LNCA_33_P3775007	3.35e-09	2.67274	mRNA	ASAP1
LNCA_33_P3265504	0.000688742	0.464241	mRNA	EIF5AL1
LNCA_23_P435407	5.14e-05	0.452406	mRNA	GPC4
LNCA_21_P0012894	4.99e-07	0.370236	mRNA	XLOC_l2_011959
LNCA_33_P3395008	0.000985895	2.32424	mRNA	ACOXL
LNCA_23_P9603	2.58e-07	3.37573	mRNA	PRKDC
LNCA_21_P0007921	0.000337491	0.480681	mRNA	XLOC_010291
LNCA_32_P66881	1.85e-05	3.36764	mRNA	TLR4
LNCA_24_P244944	3.81e-08	3.5501	mRNA	MCTP2
LNCA_33_P3322353	3.43e-06	2.38118	mRNA	CAPZA2
LNCA_24_P283288	3.74e-08	3.59644	mRNA	MAPK14
LNCA_33_P3390950	0.000160965	0.492033	mRNA	LOC100128338
LNCA_23_P303210	2.85e-05	2.03839	mRNA	IKBIP
LNCA_24_P942068	3.84e-05	2.40882	mRNA	TANC2
LNCA_33_P3361412	1.38e-06	2.77893	mRNA	SLC22A15
LNCA_32_P199767	5.78e-05	0.319164	mRNA	ZNF630
LNCA_23_P355311	6.99e-09	0.497243	mRNA	PTCH2
LNCA_33_P3438201	2.43e-08	0.358235	mRNA
LNCA_21_P0007493	2.16e-06	0.482417	mRNA	XLOC_010108
LNCA_33_P3232038	1.42e-07	0.416214	mRNA	RBAK-LOC389458
LNCA_33_P3345132	1.95e-06	0.42495	mRNA	ZNF578
LNCA_33_P3751230	1.01e-05	0.449884	mRNA	LOC284628
LNCA_24_P148796	2.57e-05	0.360001	mRNA	MST1
LNCA_23_P1682	2.37e-06	3.12252	mRNA	TMEM45B
LNCA_19_P00322856	1.67e-06	2.08963	mRNA	FAM200B
LNCA_33_P3416767	3.73e-09	2.96217	mRNA	MAFG
LNCA_23_P86653	1.04e-05	2.77824	mRNA	SRGN
LNCA_33_P3307363	1.38e-06	0.460407	mRNA	LPHN2
LNCA_23_P139965	6.16e-08	0.370352	mRNA	SERP2
LNCA_23_P333640	2.17e-07	2.46156	mRNA	PAPLN
LNCA_23_P122443	9.46e-07	2.73052	mRNA	HIST1H1C
LNCA_24_P357100	1.69e-09	0.42941	mRNA	RASD2
LNCA_21_P0006705	8.43e-06	0.498847	mRNA	XLOC_008619
LNCA_23_P73837	2.23e-07	3.04589	mRNA	TLR8
LNCA_21_P0009784	2.58e-06	0.323784	mRNA	XLOC_013037
LNCA_23_P59528	1.13e-06	2.30319	mRNA	ACN9
LNCA_33_P3302312	0.000622801	0.467991	mRNA	IER5L
LNCA_23_P217507	2.36e-08	2.31496	mRNA	ZBED1
LNCA_33_P3423825	7.8e-05	0.488527	mRNA
LNCA_24_P62615	2.53e-06	2.10881	mRNA	CAP1
LNCA_33_P3237270	6.9e-07	0.294867	mRNA
LNCA_23_P32021	8.44e-08	0.454908	mRNA	FANCC
LNCA_23_P148121	7.89e-05	2.17265	mRNA	EHBP1L1
LNCA_23_P11390	0.000818036	0.483919	mRNA	VCY
LNCA_23_P126593	9.68e-06	2.20763	mRNA	S100A11
LNCA_33_P3404950	8.17e-07	0.452096	mRNA	MINOS1
LNCA_23_P34093	0.000211892	2.38396	mRNA	G6PD
LNCA_19_P00322793	2.02e-07	2.87386	mRNA	LOC100506190
LNCA_33_P3252491	0.00199245	0.247753	mRNA
LNCA_23_P391689	4.92e-07	2.56919	mRNA	C19orf79
LNCA_21_P0003974	1.24e-07	5.49087	mRNA	XLOC_004308
LNCA_21_P0010771	3.89e-07	0.474296	mRNA	ANKRD20A2
LNCA_32_P150632	2.9e-10	2.44101	mRNA	ANXA11
LNCA_33_P3216938	6.76e-05	0.458932	mRNA	AMPD3
LNCA_24_P50908	3.38e-08	2.01574	mRNA	TRIM11
LNCA_24_P303974	1.19e-08	2.29732	mRNA	CDC123
LNCA_23_P90273	3.4e-05	0.392778	mRNA	CHST8
LNCA_23_P17471	1.11e-07	0.483241	mRNA	FAM113A
LNCA_23_P50389	3.91e-05	0.491432	mRNA	NAT14
LNCA_23_P70571	7.88e-09	2.09646	mRNA	SLC39A7
LNCA_21_P0012133	0.000200943	2.21533	mRNA	SIRPB2
LNCA_23_P167389	7.37e-07	2.11186	mRNA	ARAP3
LNCA_21_P0000999	2.93e-09	2.33065	mRNA	XLOC_000337
LNCA_23_P24192	2.02e-07	2.38379	mRNA	RRP12
LNCA_21_P0000947	3.21e-07	0.499701	mRNA	XLOC_000044
LNCA_23_P4353	1.59e-05	2.02377	mRNA	WSB1
LNCA_24_P208567	0.000107374	8.85765	mRNA	IL18R1
LNCA_32_P407245	1.62e-08	0.393835	mRNA	DNAJC22
LNCA_23_P30884	7.88e-08	2.36125	mRNA	CLIC1
LNCA_23_P116523	1.35e-05	0.45856	mRNA
LNCA_33_P3214879	2.91e-10	2.08771	mRNA	KPNA1
LNCA_23_P168610	2.17e-08	0.443998	mRNA	TSPAN13
LNCA_33_P3407925	1.1e-05	2.2279	mRNA	VMP1
LNCA_33_P3299656	1.08e-07	2.20797	mRNA	RPGR
LNCA_33_P3271490	5.71e-08	2.26301	mRNA	RBMS1
LNCA_19_P00318054	1.29e-07	0.394949	mRNA	Q89B38
LNCA_33_P3415820	0.000106282	0.460973	mRNA	THBS1
LNCA_33_P3405839	1.69e-09	0.357755	mRNA	TPO
LNCA_23_P334709	6.32e-08	4.73397	mRNA	FKBP9
LNCA_33_P3265872	4.38e-06	0.447849	mRNA
LNCA_23_P208516	2.16e-05	2.35369	mRNA	MBOAT7
LNCA_23_P23728	0.000281738	0.462468	mRNA	SV2A
LNCA_23_P74609	1.83e-05	5.60233	mRNA	G0S2
LNCA_33_P3411315	2.21e-05	0.407343	mRNA	KRTAP3-3
LNCA_23_P143662	4.84e-05	2.14837	mRNA	PISD
LNCA_33_P3215565	4.33e-08	0.385459	mRNA
LNCA_24_P414719	9.57e-08	2.00563	mRNA	NFYA
LNCA_23_P41854	2.85e-05	2.51378	mRNA	CARD6
LNCA_33_P3292126	3.79e-06	2.05095	mRNA
LNCA_33_P3232120	2.27e-06	0.481057	mRNA	NELF
LNCA_24_P664850	2.39e-06	0.44749	mRNA	ST8SIA2
LNCA_23_P3592	4.57e-06	0.451832	mRNA	HSF4
LNCA_33_P3370424	3.74e-05	0.427564	mRNA	NOTCH1
LNCA_23_P171237	1.03e-05	2.13805	mRNA	ACRC
LNCA_33_P3409765	6.31e-08	5.2424	mRNA	MGAM
LNCA_33_P3354728	0.0117146	0.438633	mRNA
LNCA_23_P23850	0.00163227	0.425465	mRNA	DAB1
LNCA_33_P3258747	7.64e-07	0.449143	mRNA	C21orf63
LNCA_23_P18672	6.41e-09	0.389628	mRNA	GBA3
LNCA_33_P3262124	1.51e-07	2.06386	mRNA	MMP25
LNCA_33_P3319967	1.19e-05	23.433	mRNA	ARG1
LNCA_21_P0013465	3.82e-07	0.485848	mRNA	XLOC_l2_014086
LNCA_21_P0009855	4.53e-07	0.467592	mRNA	XLOC_013567
LNCA_23_P74178	1.95e-06	0.442283	mRNA	HCRTR1
LNCA_23_P165624	0.00117594	2.8899	mRNA	TNFAIP6
LNCA_33_P3262089	1.05e-05	0.470429	mRNA	OR8G2
LNCA_33_P3273369	1.26e-07	0.347101	mRNA	SH3BP4
LNCA_23_P157007	0.0456825	2.58475	mRNA	TMEM176B
LNCA_23_P94230	1.85e-06	5.502	mRNA	LY96
LNCA_23_P215900	1.84e-05	0.476624	mRNA	SCARA3
LNCA_23_P432626	1.89e-08	2.31487	mRNA	SLC25A40
LNCA_33_P3221253	2.42e-08	2.33915	mRNA	LPP
LNCA_23_P502312	0.000107969	2.03201	mRNA	CD97
LNCA_23_P424080	9.78e-08	2.07476	mRNA	YIPF4
LNCA_23_P119102	1.74e-05	2.09373	mRNA	VASP
LNCA_19_P00321303	2.85e-07	2.8951	mRNA	LOC100506190
LNCA_23_P55616	0.00128442	2.35481	mRNA	SLC14A1
LNCA_33_P3802966	5.75e-06	0.377983	mRNA
LNCA_33_P3281695	5.18e-06	2.70955	mRNA	NLRP3
LNCA_33_P3292844	6.36e-05	0.436357	mRNA	NEUROG3
LNCA_23_P28485	5.53e-06	3.2363	mRNA	GCA
LNCA_23_P53039	7.88e-08	0.389464	mRNA	LDHC
LNCA_23_P317184	4.58e-06	2.35618	mRNA	LRRFIP2
LNCA_23_P133133	1.27e-06	2.77938	mRNA	ALPK1
LNCA_23_P67932	2.62e-05	2.54802	mRNA	CXCR1
LNCA_23_P76684	2.7e-09	2.72838	mRNA	RTN3
LNCA_24_P55496	4.62e-08	0.475474	mRNA	OSR2
LNCA_21_P0007074	4.92e-09	0.379332	mRNA	XLOC_008585
LNCA_23_P404678	8.69e-06	2.19334	mRNA	RAB3D
LNCA_24_P378987	8.18e-07	2.02265	mRNA	DHRSX
LNCA_23_P67980	1.96e-06	2.32619	mRNA	KLF7
LNCA_33_P3317392	4.48e-06	0.485415	mRNA	ADAMTS19
LNCA_33_P3321130	9.39e-07	2.834	mRNA	DENND3
LNCA_32_P121085	1.89e-05	2.29482	mRNA	DOK3
LNCA_23_P85963	1.34e-07	0.354346	mRNA	OR6Y1
LNCA_32_P93036	3.68e-06	0.395017	mRNA
LNCA_33_P3329467	3.88e-05	2.00195	mRNA	STYXL1
LNCA_33_P3340309	3.79e-06	2.10052	mRNA	ZNF768
LNCA_23_P91095	0.00016362	0.492432	mRNA	CD28
LNCA_33_P3412184	2.6e-07	2.53084	mRNA	ZNF865
LNCA_23_P216038	5.42e-07	2.26433	mRNA	PHF20L1
LNCA_23_P134176	0.000201265	2.21135	mRNA	SOD2
LNCA_33_P3326892	5.72e-07	0.379495	mRNA
LNCA_23_P38328	3.99e-07	0.49002	mRNA	DBF4B
LNCA_33_P3300635	0.0190888	3.20401	mRNA	PFKFB2
LNCA_33_P3257279	6.16e-05	0.38487	mRNA	TMEM145
LNCA_33_P3653330	7.98e-08	2.24592	mRNA	MAP2K4
LNCA_23_P100220	7.89e-07	0.40418	mRNA	ESRP2
LNCA_33_P3278318	4.78e-07	3.66857	mRNA	MSRB2
LNCA_33_P3395209	6.26e-07	0.332918	mRNA
LNCA_23_P156284	5.04e-08	2.06937	mRNA	DBN1
LNCA_24_P45005	3.17e-06	2.11384	mRNA	NPEPL1
LNCA_33_P3526458	2.07e-05	0.427579	mRNA	LOC338579
LNCA_24_P190472	1.88e-07	6.16402	mRNA	SLPI
LNCA_33_P3381361	0.000293778	0.352494	mRNA	SPG7
LNCA_33_P3251148	9.22e-07	2.94151	mRNA	TSPO
LNCA_23_P85941	1.03e-08	0.488027	mRNA	ALX3
LNCA_21_P0005323	3.19e-07	0.449111	mRNA	XLOC_006559
LNCA_21_P0004557	2.55e-10	0.394669	mRNA	XLOC_004850
LNCA_33_P3861706	6.58e-06	2.01228	mRNA	MTMR10
LNCA_33_P3229472	9.15e-07	0.445807	mRNA	KRTAP5-10
LNCA_33_P3267230	9.23e-08	2.35364	mRNA	TBC1D3G
LNCA_33_P3387352	0.018064	3.02184	mRNA
LNCA_21_P0003946	1.99e-06	0.478283	mRNA	XLOC_004248
LNCA_33_P3326667	5.86e-08	0.354987	mRNA
LNCA_23_P200396	3.9e-07	2.48112	mRNA	TMEM234
LNCA_24_P131580	0.000363767	0.423115	mRNA	ALPPL2
LNCA_23_P42257	1.83e-05	2.03843	mRNA	IER3
LNCA_24_P41939	7.18e-06	0.474849	mRNA
LNCA_21_P0010184	2.81e-07	0.377621	mRNA	XLOC_014020
LNCA_23_P49338	5.37e-06	2.30974	mRNA	TNFRSF12A
LNCA_33_P3387616	1.68e-05	0.354005	mRNA	RHPN1
LNCA_23_P135257	4.56e-09	0.422467	mRNA	PRSS3
LNCA_24_P323635	5.29e-05	0.431856	mRNA
LNCA_23_P259863	2.77e-06	23.4278	mRNA	CD177
LNCA_23_P71649	3.28e-06	0.49033	mRNA	MUSK
LNCA_33_P3394868	0.00116857	2.61853	mRNA	LOC388588
LNCA_23_P54758	2.1e-06	2.16288	mRNA	GDE1
LNCA_21_P0013802	7.51e-08	2.75434	mRNA	TMLHE
LNCA_33_P3393806	0.00151382	0.376687	mRNA	ATP13A2
LNCA_24_P339664	4.39e-07	2.08193	mRNA	NCLN
LNCA_23_P203445	2.36e-10	2.31311	mRNA	UEVLD
LNCA_23_P79518	0.000125475	2.13086	mRNA	IL1B
LNCA_33_P3289236	8.55e-07	7.37183	mRNA	HPR
LNCA_23_P5831	6.08e-06	2.04946	mRNA	HPCAL1
LNCA_23_P362659	2.06e-05	2.13542	mRNA	MYD88
LNCA_24_P276628	4.31e-05	2.11487	mRNA	PPT1
LNCA_24_P886040	2.65e-06	2.14732	mRNA	DCP2
LNCA_33_P3292739	3.18e-05	0.470016	mRNA	USP17L2
LNCA_23_P202750	5.12e-07	2.25596	mRNA	C11orf54
LNCA_33_P3406370	3.93e-05	0.484864	mRNA
LNCA_23_P28334	8.72e-05	6.48671	mRNA	IL18RAP
LNCA_24_P396650	1.75e-07	2.21773	mRNA	RPS6KA1
LNCA_23_P393099	1.97e-08	0.499447	mRNA	TFF3
LNCA_33_P3244803	2.04e-05	2.16332	mRNA	ACOX1
LNCA_33_P3854217	0.000281848	2.28648	mRNA	KIAA0319L
LNCA_33_P3400763	3.21e-09	5.34248	mRNA	PLIN4
LNCA_23_P109470	1.01e-07	2.61388	mRNA	THOC5
LNCA_23_P155830	2.92e-07	2.71109	mRNA	TBC1D14
LNCA_33_P3211078	2.99e-08	0.376306	mRNA	HMGA2
LNCA_19_P00321973	9.49e-08	2.07488	mRNA	Q29HP5
LNCA_33_P3350393	9.92e-06	0.489913	mRNA	CES2
LNCA_33_P3841755	5.41e-07	0.38905	mRNA	LOC145945
LNCA_23_P29036	3.6e-07	2.50472	mRNA	IFNGR2
LNCA_19_P00324359	0.000106361	0.448983	mRNA	P39188
LNCA_33_P3257627	2.34e-07	2.99715	mRNA
LNCA_23_P102391	5.25e-06	2.38355	mRNA	SLC40A1
LNCA_24_P387869	6.53e-07	2.28266	mRNA	PKN2
LNCA_33_P3415440	5.74e-07	2.27439	mRNA	MAP3K2
LNCA_33_P3350863	0.000339104	7.11136	mRNA	RETN
LNCA_23_P139509	1.89e-06	2.08572	mRNA	ERGIC2
LNCA_33_P3257155	5.15e-07	2.00686	mRNA	SMAP1
LNCA_21_P0009685	2.15e-08	2.16121	mRNA	TMEM167A
LNCA_23_P253723	0.00010131	0.410523	mRNA	RRH
LNCA_23_P53763	4.34e-05	2.10492	mRNA	KIAA0226L
LNCA_23_P75769	0.00128256	2.40649	mRNA	MS4A4A
LNCA_33_P3277988	2.45e-08	2.88018	mRNA	IFNAR1
LNCA_33_P3242659	2.19e-07	3.29671	mRNA	KIF13A
LNCA_33_P3410654	0.00199649	2.58405	mRNA	CLEC12B
LNCA_21_P0011911	3.47e-05	0.495154	mRNA	XLOC_l2_007986
LNCA_21_P0009867	6.71e-07	0.417981	mRNA	XLOC_013589
LNCA_33_P3375269	4.39e-07	0.463694	mRNA
LNCA_33_P3340424	2.71e-07	2.16384	mRNA
LNCA_33_P3783812	3.44e-07	2.62464	mRNA	C8orf60
LNCA_21_P0003320	4.96e-05	0.49363	mRNA	XLOC_003738
LNCA_21_P0012555	2.63e-06	0.403268	mRNA	XLOC_l2_010422
LNCA_23_P65712	0.0111322	11.5416	mRNA	FAM103A1
LNCA_21_P0011778	6.61e-06	2.88991	mRNA	XLOC_l2_007025
LNCA_24_P83899	3.6e-05	0.429546	mRNA	GRM5
LNCA_23_P158725	0.000212069	2.52423	mRNA	SLC16A3
LNCA_33_P3223990	5.28e-08	2.09152	mRNA	TPM3
LNCA_19_P00316063	1.07e-07	3.02508	mRNA	LOC100506190
LNCA_33_P3275600	7.87e-07	0.417696	mRNA	PLA2G4E
LNCA_33_P3289296	3.6e-07	0.441434	mRNA	TMEM37
LNCA_23_P106258	8.97e-06	0.471895	mRNA	SLC25A47
LNCA_33_P3392740	5.27e-07	0.433906	mRNA	ATOH8
LNCA_33_P3577120	1.48e-05	0.447014	mRNA
LNCA_23_P379630	2.83e-07	0.486233	mRNA	SLC38A10
LNCA_33_P3320782	0.00756073	0.395545	mRNA	ATXN7
LNCA_33_P3413224	7.49e-06	0.480294	mRNA
LNCA_23_P374082	5.3e-06	2.75759	mRNA	ADAM19
LNCA_21_P0009176	2e-07	0.43423	mRNA	XLOC_012252
LNCA_24_P379750	1.37e-05	2.48256	mRNA	MXD1
LNCA_23_P50872	5.12e-06	0.418649	mRNA	NDUFB7
LNCA_23_P104996	1.15e-06	2.98984	mRNA	BEST1
LNCA_33_P3278407	9.18e-06	0.491323	mRNA	MLLT4
LNCA_33_P3328426	1.77e-07	2.09023	mRNA	ANO10
LNCA_33_P3396891	5.52e-07	0.427075	mRNA	AVPI1
LNCA_33_P3390539	1.14e-06	0.299823	mRNA	GYLTL1B
LNCA_23_P88626	4.27e-07	2.42483	mRNA	ANPEP
LNCA_24_P33982	6.04e-08	3.26326	mRNA	MILR1
LNCA_23_P414281	0.000280845	0.290256	mRNA	C16orf71
LNCA_33_P3347168	4.19e-07	2.67745	mRNA	TBL1X
LNCA_33_P3337277	0.000915229	0.484157	mRNA	LOC100129846
LNCA_33_P3485976	7.41e-06	0.390147	mRNA
LNCA_23_P127721	1.31e-05	0.416434	mRNA	P2RX3
LNCA_21_P0001937	1.66e-05	0.448029	mRNA	XLOC_001757
LNCA_23_P16538	3.3e-07	2.47317	mRNA	ELL
LNCA_33_P3213392	6.48e-05	0.479033	mRNA
LNCA_33_P3338166	1.24e-05	2.03868	mRNA	NUAK2
LNCA_21_P0004617	1.04e-06	4.84366	mRNA	XLOC_005900
LNCA_33_P3299525	3.08e-08	2.11584	mRNA	KCTD21
LNCA_21_P0009866	5.2e-06	0.407144	mRNA	XLOC_013583
LNCA_23_P51711	6.17e-06	0.46006	mRNA	CELA2B
LNCA_33_P3668049	8.77e-09	2.79357	mRNA	RHOT1
LNCA_21_P0003439	2.74e-05	0.405741	mRNA	XLOC_003829
LNCA_23_P40847	1.26e-07	2.16962	mRNA	CHST2
LNCA_32_P100109	8.28e-08	3.81988	mRNA	REPS2
LNCA_23_P76622	5.31e-07	0.409321	mRNA	DCT
LNCA_32_P393316	5.49e-05	0.388407	mRNA	RAPGEF3
LNCA_33_P3290403	5.67e-07	3.02946	mRNA	IMPA2
LNCA_24_P228130	0.0464393	2.80245	mRNA	CCL3L3
LNCA_33_P3417308	4.23e-07	0.36554	mRNA
LNCA_33_P3247392	1.21e-09	2.23216	mRNA	TPTE
LNCA_33_P3318534	0.000303586	0.438053	mRNA	ACPL2
LNCA_33_P3237266	8.66e-08	2.68576	mRNA	IDS
LNCA_24_P830690	3.11e-08	2.08365	mRNA	PDPK1
LNCA_19_P00322384	0.000289118	0.259917	mRNA	Q9H8W2
LNCA_19_P00320970	2.44e-06	0.412487	mRNA	XLOC_005020
LNCA_33_P3216517	5.53e-11	2.27321	mRNA	NEK6
LNCA_24_P4054	1.15e-07	2.38116	mRNA	TRIP6
LNCA_23_P149613	7.58e-05	0.420513	mRNA	FMO1
LNCA_21_P0002874	4.2e-10	0.362411	mRNA	XLOC_003220
LNCA_23_P9465	3.93e-06	0.339184	mRNA	FPGS
LNCA_23_P420610	4.43e-07	2.72267	mRNA	FCHO2
LNCA_32_P806841	4.53e-07	3.10348	mRNA	ARL4A
LNCA_24_P218814	1.13e-05	2.42085	mRNA	RDH5
LNCA_33_P3225278	0.000108236	0.364594	mRNA
LNCA_23_P139050	1.39e-07	0.353446	mRNA	OR8D2
LNCA_32_P69930	3.67e-05	0.43175	mRNA	CCDC96
LNCA_23_P16242	4.71e-08	2.50035	mRNA	ZNF20
LNCA_23_P318300	4.14e-06	2.68482	mRNA	ZAK
LNCA_24_P409346	5.32e-09	2.01146	mRNA	NPEPPS
LNCA_24_P487736	8.07e-07	2.20866	mRNA	CXorf23
LNCA_33_P3471466	0.000157424	0.409002	mRNA	C14orf166B
LNCA_33_P3364864	6.6e-06	3.07077	mRNA	NAMPT
LNCA_23_P383986	2.13e-06	2.74654	mRNA	CHST15
LNCA_32_P212373	5.58e-09	3.89923	mRNA
LNCA_33_P3343210	3.32e-06	2.50978	mRNA	SLC25A37
LNCA_33_P3324137	2.74e-07	2.30647	mRNA	PRO0628
LNCA_33_P3258546	2.31e-09	0.395988	mRNA	PCDHA5
LNCA_33_P3362981	9.22e-06	0.498076	mRNA	KCTD5
LNCA_24_P48057	8.21e-06	0.254392	mRNA	IRX5
LNCA_23_P66180	9.78e-06	0.458261	mRNA	CACNG3
LNCA_24_P115511	1.53e-08	2.00487	mRNA	RAB14
LNCA_23_P423864	1.42e-06	3.74786	mRNA	PHC2
LNCA_23_P130113	0.00452223	2.28404	mRNA	ASGR2
LNCA_23_P144126	4.65e-07	0.197882	mRNA	FETUB
LNCA_33_P3364869	1.32e-05	3.17779	mRNA	NAMPT
LNCA_23_P103465	1.56e-06	0.486981	mRNA	PLA2G5
LNCA_33_P3346473	1.61e-08	2.64998	mRNA	PHF21A
LNCA_33_P3258127	3.23e-06	0.474905	mRNA	LOC100132188
LNCA_23_P214565	1.65e-08	0.309331	mRNA	MAS1L
LNCA_24_P314681	3.56e-06	0.456047	mRNA
LNCA_24_P212072	1.99e-08	2.58037	mRNA	ANKRD32
LNCA_23_P67339	4.76e-07	3.0626	mRNA	RCN3
LNCA_23_P142447	1.27e-05	2.03337	mRNA	MYO1F
LNCA_23_P256641	0.000217884	2.72646	mRNA	KCNE1L
LNCA_23_P259632	7.18e-08	2.78351	mRNA	TMEM120A
LNCA_33_P3211679	3.41e-05	0.432785	mRNA	TSPAN11
LNCA_33_P3321342	1.27e-07	2.06335	mRNA	INSIG2
LNCA_33_P3211260	0.000228985	2.19459	mRNA	DBNL
LNCA_32_P133090	3.06e-06	4.33727	mRNA
LNCA_33_P3303414	7.78e-09	2.41843	mRNA	MAN1A1
LNCA_32_P138004	1.12e-05	2.05806	mRNA	FAM45A
LNCA_33_P3684897	3.02e-10	0.40435	mRNA	FLJ30064
LNCA_32_P98227	6.16e-09	0.490488	mRNA	LDB3
LNCA_33_P3397150	0.000227214	0.393546	mRNA	FLJ22184
LNCA_21_P0013257	5.02e-06	0.466529	mRNA	LOC100289187
LNCA_23_P101683	0.000307454	0.425137	mRNA	CLC
LNCA_33_P3333992	2.91e-08	2.34783	mRNA	LOC100132495
LNCA_24_P409402	4.39e-05	0.407137	mRNA
LNCA_33_P3357082	9.29e-05	0.476859	mRNA	METTL8
LNCA_32_P103945	0.00755518	2.04608	mRNA	B4GALT4
LNCA_33_P3315929	1.58e-08	2.18049	mRNA	PTBP3
LNCA_33_P3339696	1.94e-07	3.95184	mRNA
LNCA_32_P148345	0.000473082	0.27097	mRNA	ANXA2
LNCA_24_P396375	1.71e-06	2.74165	mRNA	ECE1
LNCA_23_P1199	1.13e-05	2.10934	mRNA	NUDT5
LNCA_24_P74559	5.78e-06	2.06939	mRNA	CYTH4
LNCA_23_P251937	7.02e-07	3.25224	mRNA	CPEB4
LNCA_23_P204436	6.37e-07	2.14807	mRNA	GIT2
LNCA_33_P3357591	3.78e-06	2.60157	mRNA	ATHL1
LNCA_23_P106602	1.51e-06	2.99662	mRNA	CRISPLD2
LNCA_24_P140204	1.09e-08	2.91768	mRNA	PXK
LNCA_33_P3223002	5.1e-07	2.55596	mRNA	GPR77
LNCA_23_P327069	2.9e-09	2.67424	mRNA	KIAA0232
LNCA_23_P53557	1.25e-06	2.61331	mRNA	LTBR
LNCA_23_P3532	2.76e-07	2.53105	mRNA	LITAF
LNCA_23_P403284	5.41e-10	5.77602	mRNA	OTX1
LNCA_23_P207058	5.61e-07	6.26969	mRNA	SOCS3
LNCA_33_P3357651	0.00025039	0.370005	mRNA	KRTAP10-12
LNCA_24_P80532	4.72e-07	2.10281	mRNA	CCNG2
LNCA_33_P3230264	3.28e-09	0.489802	mRNA	GPC3
LNCA_23_P301995	0.000695047	0.287758	mRNA	LIN9
LNCA_23_P130515	0.000145056	2.19413	mRNA	CEACAM3
LNCA_21_P0001946	2.07e-06	0.398808	mRNA	XLOC_001777
LNCA_24_P208436	2.52e-07	0.408163	mRNA	PDE1A
LNCA_23_P341527	1.26e-07	0.469073	mRNA	DCST1
LNCA_21_P0002981	3.97e-07	0.447572	mRNA	XLOC_002713
LNCA_23_P127175	3.05e-06	0.445942	mRNA	SAR1A
LNCA_23_P382705	0.000176082	2.13069	mRNA	TMTC2
LNCA_24_P37540	1.87e-05	2.3033	mRNA	ARPC4-TTLL3
LNCA_21_P0012626	0.000700745	2.06476	mRNA	XLOC_l2_010897
LNCA_33_P3271445	3.68e-08	2.11393	mRNA	COL4A3BP
LNCA_19_P00320996	1.89e-07	2.4183	mRNA	P39188
LNCA_24_P230916	1.26e-05	2.05592	mRNA	MIER1
LNCA_23_P105002	1.35e-09	3.35995	mRNA	ROM1
LNCA_33_P3277973	4.39e-07	2.5242	mRNA	AMICA1
LNCA_23_P147826	6.06e-07	2.36733	mRNA	RAP2C
LNCA_23_P153964	7.18e-07	9.66084	mRNA	INHBB
LNCA_33_P3343155	2.14e-08	2.73071	mRNA	GNAQ
LNCA_21_P0005565	1.18e-07	2.22498	mRNA	XLOC_006132
LNCA_19_P00322797	2.6e-06	0.474454	mRNA	SEC14L1
LNCA_24_P107941	1.78e-08	2.74906	mRNA	C16orf57
LNCA_33_P3283237	1.28e-05	0.348434	mRNA	YY2
LNCA_23_P390116	2.34e-06	2.15266	mRNA	SPATA13
LNCA_24_P4816	3.08e-08	2.52269	mRNA	GABARAPL1
LNCA_23_P141146	6.42e-09	2.02691	mRNA	FBXL20
LNCA_33_P3221111	0.000865423	0.426801	mRNA	PGA3
LNCA_33_P3289456	0.000164543	0.489911	mRNA
LNCA_33_P3303469	1.84e-07	0.424422	mRNA
LNCA_24_P196019	2.15e-05	2.521	mRNA
LNCA_33_P3217719	0.000193667	0.374227	mRNA	TLE1
LNCA_23_P62227	1.36e-05	2.44326	mRNA	CXorf21
LNCA_33_P3250680	2.66e-05	0.468726	mRNA	CD40LG
LNCA_33_P3479449	2.23e-06	7.36316	mRNA	LOC100506328
LNCA_33_P3241646	2.74e-10	2.05041	mRNA	PANK3
LNCA_23_P157580	8.22e-06	2.29772	mRNA	SDCBP
LNCA_33_P3399634	1.04e-07	0.427361	mRNA	RASSF10
LNCA_23_P212844	0.000301496	2.05389	mRNA	TACC3
LNCA_33_P3378935	6.38e-11	0.485414	mRNA	RBM14
LNCA_23_P34066	1.93e-06	0.492733	mRNA	IL9R
LNCA_33_P3221688	1.02e-06	0.225686	mRNA
LNCA_23_P384857	0.000130865	0.461337	mRNA
LNCA_21_P0003960	7.88e-07	0.468931	mRNA	XLOC_004274
LNCA_21_P0011616	1.46e-06	0.447297	mRNA	XLOC_l2_005692
LNCA_24_P296698	8.14e-05	2.01444	mRNA	MAP2K3
LNCA_33_P3414883	3.44e-07	0.483424	mRNA	ATMIN
LNCA_23_P68851	1.14e-06	5.85056	mRNA	KREMEN1
LNCA_23_P57413	1.04e-07	2.77126	mRNA	PPM1F
LNCA_33_P3237744	7.44e-05	0.458971	mRNA	SGK110
LNCA_23_P54477	4.53e-06	2.19788	mRNA	NOP10
LNCA_23_P9056	3.87e-07	2.05199	mRNA	RB1CC1
LNCA_23_P87049	1.75e-06	2.45931	mRNA	SORL1
LNCA_33_P3301980	1.94e-09	0.398138	mRNA
LNCA_33_P3411945	1.39e-05	2.58453	mRNA	C19orf38
LNCA_33_P3579984	2.51e-06	2.34736	mRNA	LOC285147
LNCA_33_P3367924	2.39e-06	0.400305	mRNA	PABPN1L
LNCA_33_P3338152	3.68e-05	0.489027	mRNA	HIF3A
LNCA_33_P3324409	2.16e-07	0.429764	mRNA
LNCA_23_P138725	1.44e-05	2.14861	mRNA	MARVELD1
LNCA_23_P216596	4.15e-07	0.498135	mRNA	SVEP1
LNCA_32_P75284	3.09e-07	0.421014	mRNA	KATNAL1
LNCA_33_P3298105	2.61e-06	2.27567	mRNA	SPATA13
LNCA_23_P1602	6.66e-07	2.22862	mRNA	CDC42EP2
LNCA_32_P200237	3.56e-06	0.449329	mRNA	LOC157740
LNCA_23_P78750	5.48e-08	0.447742	mRNA	SLC17A7
LNCA_19_P00322299	1.36e-06	2.23275	mRNA	ZSWIM6
LNCA_33_P3235204	3.01e-05	0.499307	mRNA	ELMOD3
LNCA_23_P170901	2.81e-08	0.393479	mRNA	PACRG
LNCA_33_P3327852	1.32e-06	2.41906	mRNA	NDEL1
LNCA_23_P84448	1.21e-05	2.08715	mRNA	TUBA4A
LNCA_23_P96633	8.5e-09	0.406559	mRNA	CXorf48
LNCA_24_P343559	7.34e-07	0.444381	mRNA	NTRK2
LNCA_33_P3374030	2.96e-06	0.441183	mRNA	LOC100132197
LNCA_19_P00315773	9.79e-05	0.463998	mRNA	Q6LRY1
LNCA_33_P3629678	6.11e-05	0.451864	mRNA	COL5A1
LNCA_24_P29595	5.24e-09	2.92886	mRNA	STXBP5
LNCA_23_P13753	1.88e-05	2.21078	mRNA	NFE2
LNCA_23_P119789	9.59e-09	2.84284	mRNA	TMEM185B
LNCA_23_P404667	1.67e-06	2.81184	mRNA	BIK
LNCA_21_P0005332	1.57e-05	0.381357	mRNA	XLOC_006593
LNCA_23_P128470	0.00272367	2.82085	mRNA	CLEC12A
LNCA_23_P132341	6.17e-09	0.358071	mRNA	C22orf46
LNCA_33_P3289536	3.08e-06	2.41043	mRNA	SNX10
LNCA_23_P152002	0.000191355	5.53957	mRNA	BCL2A1
LNCA_23_P33847	2.37e-06	0.412168	mRNA	SYN1
LNCA_23_P119763	1.4e-07	0.393746	mRNA	ABCG5
LNCA_23_P36305	1.12e-05	2.39618	mRNA	ATG16L2
LNCA_33_P3256550	8.54e-06	0.493117	mRNA	MST152
LNCA_33_P3269844	3.18e-05	0.474928	mRNA	LRRC26
LNCA_21_P0011242	1.08e-09	0.238419	mRNA	XLOC_l2_004180
LNCA_33_P3379454	6.33e-10	0.381748	mRNA	UHRF1
LNCA_21_P0013914	6.61e-08	4.35249	mRNA	FAM157B
LNCA_23_P118722	0.00442438	2.34073	mRNA	ASGR1
LNCA_33_P3316696	4.06e-06	0.435365	mRNA
LNCA_33_P3345309	2.9e-06	0.425419	mRNA	PRSS56
LNCA_33_P3282394	1.38e-07	2.46526	mRNA	MLLT1
LNCA_33_P3378291	5.02e-05	0.462727	mRNA	IL17REL
LNCA_21_P0010355	4.32e-08	0.428437	mRNA	XLOC_014215
LNCA_33_P3709525	2.92e-07	0.439135	mRNA
LNCA_21_P0001238	9.18e-09	3.69574	mRNA	XLOC_001257
LNCA_33_P3239332	8.6e-07	0.469463	mRNA	LOC284260
LNCA_33_P3321432	0.00101815	2.62491	mRNA	FAM198B
LNCA_33_P3366667	0.00232769	0.448573	mRNA	EYA1
LNCA_23_P27315	0.000224302	2.4765	mRNA	EMILIN2
LNCA_23_P81158	1.54e-08	0.411697	mRNA	ADH1C
LNCA_23_P50799	8.47e-06	0.456702	mRNA	OR10H2
LNCA_33_P3355944	9.45e-12	0.476452	mRNA
LNCA_33_P3273906	4.25e-09	0.37627	mRNA	OR10G4
LNCA_23_P342138	2.06e-07	0.365737	mRNA	ADAMTSL1
LNCA_33_P3327491	8.17e-09	0.403242	mRNA
LNCA_23_P38959	8.3e-05	2.0246	mRNA	VAV1
LNCA_23_P19543	4.85e-08	3.27927	mRNA	SRPK1
LNCA_33_P3214119	5.22e-08	2.2342	mRNA	NPEPPS
LNCA_21_P0006739	2.19e-05	0.458712	mRNA	XLOC_008745
LNCA_33_P3243399	6.31e-07	2.19021	mRNA	SLMAP
LNCA_23_P8640	5e-05	4.35706	mRNA	GPER
LNCA_33_P3260373	6.06e-06	2.28804	mRNA	ISY1-RAB43
LNCA_23_P500328	4.92e-08	0.41875	mRNA	DCX
LNCA_23_P75867	7.84e-06	0.386192	mRNA	OR10A4
LNCA_33_P3288110	6.34e-07	2.2211	mRNA	PKP4
LNCA_23_P400147	6.02e-05	0.381181	mRNA	CCDC61
LNCA_33_P3362367	6.28e-09	3.24382	mRNA	RTN3
LNCA_21_P0005360	2.19e-06	0.277265	mRNA	XLOC_006009
LNCA_33_P3538279	7.5e-09	2.45878	mRNA	PRO2852
LNCA_23_P4161	1.01e-06	2.15899	mRNA	ARSG
LNCA_23_P208747	1.21e-05	2.64662	mRNA	PGLYRP1
LNCA_23_P308021	2.35e-10	0.35815	mRNA	CABP4
LNCA_23_P105691	7.43e-08	0.455063	mRNA	GPRC5D
LNCA_19_P00319675	2.07e-07	2.89614	mRNA	LOC100506190
LNCA_33_P3364060	8.05e-07	0.478948	mRNA	HR
LNCA_33_P3295738	4.16e-06	0.479243	mRNA	CNGB1
LNCA_23_P254648	4.08e-08	2.04309	mRNA	FBXW2
LNCA_33_P3404623	7.17e-06	0.490212	mRNA	MKS1
LNCA_33_P3231110	7.89e-06	2.0219	mRNA	USP3
LNCA_33_P3274001	2.52e-08	0.44213	mRNA
LNCA_23_P59179	4.42e-09	0.420313	mRNA	RXRB
LNCA_23_P207336	3.59e-09	0.460343	mRNA	PPY
LNCA_24_P627306	2.99e-06	2.10781	mRNA	EDEM2
LNCA_23_P29365	7.81e-08	2.06096	mRNA	RYBP
LNCA_21_P0010339	1.15e-07	2.39908	mRNA	XLOC_014137
LNCA_33_P3250253	9.24e-05	0.444789	mRNA	LOC100131150
LNCA_23_P354734	4.59e-07	0.473908	mRNA	PCDHGA8
LNCA_32_P9543	0.00749327	2.06972	mRNA	APOBEC3A
LNCA_23_P37484	0.000212485	2.24342	mRNA	CHSY1
LNCA_19_P00320434	3.97e-08	0.407399	mRNA	XLOC_001728
LNCA_33_P3259293	5.5e-09	0.388092	mRNA	SLC37A3
LNCA_33_P3881262	0.000132051	2.00717	mRNA	CSF3R
LNCA_33_P3324894	3e-08	0.443855	mRNA	HIP1R
LNCA_33_P3240843	1.81e-08	2.52726	mRNA	TMEM71
LNCA_33_P3251369	1.48e-09	2.17337	mRNA	GAB3
LNCA_33_P3637909	5.27e-09	0.472742	mRNA	UBE2D4
LNCA_33_P3412687	2.45e-05	0.490532	mRNA
LNCA_19_P00813077	2.54e-08	3.18514	mRNA	LOC375190
LNCA_24_P941359	4.27e-06	2.50624	mRNA	FAM65B
LNCA_33_P3280099	3.77e-06	0.412477	mRNA	CACNA1B
LNCA_32_P108655	9e-10	2.2962	mRNA	AK4
LNCA_33_P3280721	0.000388885	2.53049	mRNA	WLS
LNCA_23_P414273	8.98e-07	2.35661	mRNA	C5orf62
LNCA_23_P46936	2.46e-09	0.331718	mRNA	EGR2
LNCA_23_P502750	9.16e-06	2.17717	mRNA	MDM2
LNCA_33_P3356811	5.25e-07	0.418666	mRNA	LCE1E
LNCA_24_P297078	1.39e-09	4.07891	mRNA	C20orf3
LNCA_33_P3361746	1.71e-06	2.00797	mRNA	TRPS1
LNCA_33_P3268612	2.53e-06	0.45904	mRNA	IL28RA
LNCA_23_P121011	1.2e-05	2.83049	mRNA	CSRNP1
LNCA_23_P164691	0.000175874	2.00639	mRNA	ICAM3
LNCA_33_P3567961	3.4e-08	0.317797	mRNA
LNCA_23_P34888	2.93e-08	0.460551	mRNA	CHIA
LNCA_24_P409519	1.57e-09	0.456513	mRNA	PTPN5
LNCA_33_P3339109	0.00148303	0.470143	mRNA	POLR1C
LNCA_21_P0010094	8.92e-06	0.368283	mRNA	XLOC_013552
LNCA_23_P143016	7.46e-05	2.08011	mRNA	ARID5A
LNCA_23_P259621	0.000149695	2.05929	mRNA	LAT2
LNCA_33_P3274134	6.28e-05	0.435102	mRNA	TMEM151B
LNCA_23_P376088	1.92e-08	0.465105	mRNA	LIME1
LNCA_24_P144773	3.53e-09	2.34925	mRNA	RNF145
LNCA_23_P114947	1.29e-05	3.11612	mRNA	RGS2
LNCA_21_P0012280	9.07e-08	0.460317	mRNA	VWF
LNCA_23_P386888	1.04e-05	0.491359	mRNA	LPA
LNCA_23_P315991	3.28e-10	0.383022	mRNA	OR10A5
LNCA_33_P3564409	9.84e-07	0.462081	mRNA
LNCA_33_P3342862	6.56e-10	0.459413	mRNA	ZNF664-FAM101A
LNCA_33_P3214096	7.34e-08	0.452307	mRNA	ATF3
LNCA_33_P3341970	1.25e-06	0.499849	mRNA	NEGR1
LNCA_21_P0013671	1.79e-06	0.34589	mRNA	XLOC_l2_015295
LNCA_19_P00323609	2.13e-05	0.32548	mRNA	XLOC_001663
LNCA_33_P3341676	4.49e-07	2.65639	mRNA	MEF2A
LNCA_33_P3300733	9.93e-09	0.285039	mRNA
LNCA_33_P3265374	1.82e-07	2.50469	mRNA	HOMER3
LNCA_24_P363548	0.00678756	2.01232	mRNA	HIP1
LNCA_32_P426044	1.7e-08	0.470485	mRNA	FAM47A
LNCA_33_P3287735	2.96e-07	2.14066	mRNA	KAT6A
LNCA_33_P3271430	4.13e-06	2.5078	mRNA	MAP3K3
LNCA_23_P69188	1.23e-07	2.24884	mRNA	DPH3
LNCA_33_P3226755	3.71e-07	0.450971	mRNA	FLNA
LNCA_24_P306469	0.0154493	0.467848	mRNA
LNCA_33_P3358019	2.55e-05	0.497337	mRNA
LNCA_32_P79591	1.85e-06	0.466083	mRNA	ZNF665
LNCA_33_P3212704	1.9e-08	0.455985	mRNA
LNCA_23_P253921	3.29e-07	2.02298	mRNA	ZNF167
LNCA_23_P96899	1.53e-09	0.410252	mRNA	PGLYRP3
LNCA_33_P3302070	1.14e-05	0.486071	mRNA
LNCA_23_P355824	4.57e-05	2.00337	mRNA	MGRN1
LNCA_19_P00316326	2.71e-05	2.07696	mRNA	MAP3K13
LNCA_33_P3305487	1.91e-06	3.45099	mRNA	REM2
LNCA_23_P11705	0.0136972	2.74504	mRNA	BSDC1
LNCA_23_P36611	1.38e-07	2.62869	mRNA	APAF1
LNCA_21_P0001900	0.000423378	0.416647	mRNA	XLOC_001620
LNCA_23_P102037	5.74e-08	2.01588	mRNA	COQ10B
LNCA_23_P143774	4.27e-05	0.42511	mRNA	MOV10L1
LNCA_33_P3274090	9.28e-09	0.396487	mRNA
LNCA_23_P71433	1.6e-06	2.14066	mRNA	UBE2W
LNCA_23_P111132	1.76e-06	2.40593	mRNA	HSPA1A
LNCA_24_P261567	5.26e-08	0.358612	mRNA	GDPD5
LNCA_23_P211401	1.94e-07	5.71148	mRNA	KREMEN1
LNCA_21_P0005010	3.95e-08	0.496725	mRNA	XLOC_005633
LNCA_24_P336759	8.63e-06	2.06474	mRNA	MCL1
LNCA_33_P3353365	3.89e-07	0.441027	mRNA	SLC17A4
LNCA_33_P3303865	3.91e-07	0.471746	mRNA	FAM120C
LNCA_33_P3334185	3.77e-08	2.5728	mRNA	AGTPBP1
LNCA_33_P3326904	4.89e-06	3.27487	mRNA	LOC441268
LNCA_23_P500410	4.75e-05	0.424193	mRNA	ATP6V1G2
LNCA_24_P940149	3.55e-08	0.488119	mRNA	C2CD2
LNCA_24_P419087	4e-07	2.36894	mRNA	AVIL
LNCA_23_P141126	3.62e-07	2.19276	mRNA	GALK1
LNCA_33_P3232527	3.44e-08	2.4517	mRNA	EDEM3
LNCA_33_P3411848	1.65e-07	0.498623	mRNA	CNFN
LNCA_19_P00321063	7.09e-08	2.43208	mRNA	Q5SRJ3
LNCA_24_P193582	3.01e-06	2.15122	mRNA	DEF8
LNCA_33_P3653888	0.000178051	0.267507	mRNA	LOC100128185
LNCA_32_P230868	0.00206562	0.46127	mRNA	FAM65A
LNCA_23_P72697	1.86e-06	0.470711	mRNA	GPIHBP1
LNCA_23_P1998	1.41e-11	0.356567	mRNA	APBB1
LNCA_33_P3298349	6.61e-07	0.469216	mRNA	ART5
LNCA_33_P3650224	1.34e-05	0.495207	mRNA	CXorf49B
LNCA_33_P3332955	0.00174297	2.00836	mRNA	CLEC1B
LNCA_33_P3335257	8.57e-09	0.466799	mRNA	TMEM146
LNCA_23_P171366	1.5e-06	0.388821	mRNA	USP11
LNCA_24_P360269	4.41e-05	2.11526	mRNA	RNASET2
LNCA_23_P4714	7.79e-07	2.02087	mRNA	MIA
LNCA_24_P128308	1.9e-05	2.20045	mRNA	KLF6
LNCA_23_P417383	0.00296708	2.24979	mRNA	ASPRV1
LNCA_23_P49499	1.34e-06	2.84012	mRNA	ST6GALNAC2
LNCA_23_P68511	0.000451178	0.485637	mRNA	ANGPT4
LNCA_19_P00317897	3.91e-09	2.72576	mRNA
LNCA_23_P9485	0.000211666	6.33913	mRNA	ORM2
LNCA_21_P0001245	4.17e-06	3.33567	mRNA	XLOC_001265
LNCA_23_P364766	8.7e-07	2.00068	mRNA	C20orf94
LNCA_33_P3228285	1.27e-06	2.13674	mRNA	ANKRD13D
LNCA_23_P502957	8.7e-07	2.92032	mRNA	CDH26
LNCA_24_P159648	1.69e-08	0.481749	mRNA	BAIAP2
LNCA_32_P82623	2.08e-05	0.457807	mRNA	AGBL3
LNCA_33_P3377269	0.000188803	0.384836	mRNA
LNCA_21_P0001952	4.01e-08	2.70033	mRNA	CFLAR
LNCA_32_P831725	9.45e-09	2.65849	mRNA	C3orf62
LNCA_23_P101392	4.22e-07	2.20597	mRNA	TMEM38A
LNCA_33_P3333471	1.8e-08	0.409958	mRNA
LNCA_24_P941322	0.000195182	2.01	mRNA	QKI
LNCA_33_P3333648	5.65e-11	0.394727	mRNA	OR51I2
LNCA_21_P0004906	4.87e-05	0.469993	mRNA	XLOC_005376
LNCA_33_P3232294	3.05e-08	2.13346	mRNA	ITPR2
LNCA_33_P3281468	8.34e-05	0.383395	mRNA	STARD9
LNCA_33_P3351351	6.13e-08	0.480373	mRNA	ARHGEF10
LNCA_33_P3237552	1.35e-09	0.469494	mRNA	FIBCD1
LNCA_23_P166087	2.28e-05	2.08576	mRNA	RASSF2
LNCA_33_P3327687	2.39e-09	0.438937	mRNA	LOC727993
LNCA_24_P380679	1.56e-08	3.52177	mRNA	C7orf53
LNCA_21_P0013027	5.59e-08	0.397969	mRNA	XLOC_l2_012584
LNCA_23_P322395	1.07e-08	0.430216	mRNA	ZSCAN1
LNCA_33_P3315258	5.83e-07	0.422867	mRNA	CHD1L
LNCA_33_P3245841	4.26e-08	0.411851	mRNA
LNCA_23_P253896	3.57e-07	0.36383	mRNA	NPNT
LNCA_24_P925314	0.000109018	2.13444	mRNA	GM2A
LNCA_23_P102582	6.72e-07	2.57877	mRNA	C20orf24
LNCA_21_P0010699	5.08e-08	0.431224	mRNA	XLOC_l2_000138
LNCA_33_P3403270	5.06e-05	0.398895	mRNA	CCDC33
LNCA_24_P20630	0.00113274	0.479538	mRNA	LEF1
LNCA_21_P0005248	0.0269244	0.238567	mRNA	XLOC_006178
LNCA_33_P3301331	0.000117782	2.06676	mRNA	CEACAM3
LNCA_33_P3278159	5.33e-09	0.47964	mRNA
LNCA_23_P7684	1.09e-07	4.72397	mRNA	CCNJL
LNCA_23_P396353	6.13e-06	2.11822	mRNA	NIN
LNCA_32_P152696	3.07e-06	2.1629	mRNA
LNCA_23_P122852	1.28e-08	3.18381	mRNA	SMARCD3
LNCA_33_P3236046	4.9e-07	2.64	mRNA
LNCA_23_P124988	3.58e-05	0.457464	mRNA	KCNH4
LNCA_23_P21747	0.000120803	0.491354	mRNA	CABP5
LNCA_21_P0000935	0.000145274	0.41528	mRNA	XLOC_001149
LNCA_33_P3369781	3.43e-08	0.451606	mRNA	UBE2CBP
LNCA_33_P3775281	0.00013134	0.38483	mRNA	LOC644050
LNCA_32_P56001	0.000474631	2.01987	mRNA	CD93
LNCA_33_P3299766	5.79e-07	2.85877	mRNA	FAM160B1
LNCA_23_P205997	5.47e-07	2.79728	mRNA	APH1B
LNCA_33_P3408702	3.65e-09	2.3935	mRNA	KIAA0825
LNCA_33_P3415895	2.27e-06	2.41297	mRNA	NRBF2
LNCA_33_P3371650	3.05e-07	2.95725	mRNA	STK17B
LNCA_23_P374844	4.67e-07	0.371592	mRNA	GAL
LNCA_23_P310582	0.00013313	0.491452	mRNA	ST7L
LNCA_23_P142096	2.07e-06	0.49869	mRNA	GPR32
LNCA_33_P3277178	4.43e-07	0.466035	mRNA
LNCA_33_P3302320	1.6e-07	0.482203	mRNA
LNCA_33_P3216487	7.99e-08	0.464745	mRNA
LNCA_23_P154065	1.5e-05	2.47262	mRNA	TUBA4A
LNCA_33_P3374253	2.98e-05	0.294131	mRNA
LNCA_21_P0011715	1.84e-06	2.02988	mRNA	ZNF865
LNCA_24_P274640	5.06e-05	2.27599	mRNA	GTF2H2D
LNCA_23_P111635	4.11e-07	2.4081	mRNA	STYXL1
LNCA_23_P112026	1.65e-05	0.347227	mRNA	IDO1
LNCA_23_P36120	5.15e-06	2.28265	mRNA	MS4A6A
LNCA_23_P150903	3.16e-06	2.99247	mRNA	FAR2
LNCA_23_P61823	2.17e-05	2.55342	mRNA	RAB24
LNCA_24_P265088	8.15e-07	0.436733	mRNA	PDZD4
LNCA_23_P159650	0.00521143	2.00969	mRNA	COX7B
LNCA_33_P3318490	8.41e-08	0.413324	mRNA	PDZRN3
LNCA_33_P3269803	8.77e-09	2.48216	mRNA	CLSTN3
LNCA_33_P3367899	2.97e-05	2.1086	mRNA	FRAT1
LNCA_23_P95640	2.25e-10	0.407684	mRNA	C1orf186
LNCA_33_P3326025	3.4e-05	0.399526	mRNA	KANK3
LNCA_33_P3361891	1.24e-08	0.430814	mRNA	TMPRSS7
LNCA_33_P3278033	6.51e-07	0.470014	mRNA	TUSC1
LNCA_33_P3309075	6.55e-06	2.88117	mRNA	TBC1D8
LNCA_23_P406616	3.2e-06	3.61617	mRNA	C7orf74
LNCA_33_P3349265	1.73e-06	0.478553	mRNA	GLYATL3
LNCA_23_P166306	5.8e-05	5.22572	mRNA	CBS
LNCA_23_P12463	6.4e-09	2.65538	mRNA	QSOX1
LNCA_33_P3341568	0.000319943	0.437252	mRNA
LNCA_33_P3284584	0.000621443	0.393968	mRNA
LNCA_33_P3274768	5.34e-05	0.4915	mRNA	LOC100132790
LNCA_33_P3376873	1.64e-07	2.47415	mRNA
LNCA_23_P133691	3.7e-07	3.00489	mRNA	RRAGD
LNCA_23_P161156	1.15e-06	3.1565	mRNA	ZNF438
LNCA_32_P83049	0.000103493	0.405178	mRNA	EFR3B
LNCA_33_P3252068	1.3e-08	2.41069	mRNA	JHDM1D
LNCA_21_P0013859	1.54e-06	0.296948	mRNA	XLOC_l2_015673
LNCA_21_P0011533	0.00113633	0.457188	mRNA	C17orf51
LNCA_33_P3364493	2.03e-05	2.06098	mRNA
LNCA_21_P0000194	1.13e-06	2.84439	mRNA	CHST15
LNCA_33_P3396129	9.97e-09	0.451959	mRNA	KATNB1
LNCA_23_P255827	0.0028202	0.198664	mRNA	FKSG2
LNCA_33_P3630780	1.44e-08	0.427815	mRNA	LOC286058
LNCA_21_P0006115	4.19e-08	0.420554	mRNA	XLOC_007888
LNCA_33_P3281273	2.42e-05	2.15892	mRNA	S1PR4
LNCA_24_P366122	2.84e-07	0.352452	mRNA	ACBD4
LNCA_24_P272845	6.48e-05	0.390067	mRNA	DOCK3
LNCA_23_P56787	7.36e-05	0.350201	mRNA	CNTNAP5
LNCA_24_P213950	0.00475885	0.428883	mRNA	HEPACAM
LNCA_23_P157628	2.07e-06	0.340383	mRNA	DEFB4A
LNCA_33_P3570228	0.00407592	0.404312	mRNA	LOC644962
LNCA_32_P110390	1.22e-05	0.456848	mRNA	TMEM171
LNCA_21_P0000149	1.17e-08	0.399072	mRNA	C2orf3
LNCA_23_P39931	4.81e-08	3.5323	mRNA	DYSF
LNCA_21_P0001793	0.000136372	0.460037	mRNA	XLOC_002211
LNCA_23_P414958	4.35e-07	3.36995	mRNA	PLXNC1
LNCA_23_P425750	0.000309011	0.405892	mRNA	ARMC6
LNCA_24_P89701	2.94e-06	2.45898	mRNA	IMPDH1
LNCA_23_P300847	1.7e-07	0.379742	mRNA
LNCA_33_P3230818	1.34e-07	0.453207	mRNA	RCAN2
LNCA_23_P137705	4.94e-08	0.363682	mRNA	TBX19
LNCA_33_P3351388	2.57e-06	0.454931	mRNA
LNCA_23_P92499	1.15e-06	3.79042	mRNA	TLR2
LNCA_24_P98555	6.23e-08	2.51191	mRNA	FAM45A
LNCA_19_P00804396	3.65e-07	2.07761	mRNA	MAP3K2
LNCA_23_P421526	4.32e-07	0.431036	mRNA	ODF4
LNCA_33_P3424507	4.75e-05	0.440557	mRNA	OR51F1
LNCA_23_P145965	1.57e-05	10.9132	mRNA	TPST1
LNCA_33_P3510837	2.11e-06	0.239932	mRNA
LNCA_33_P3403576	2.71e-05	2.2737	mRNA	FCGR2A
LNCA_23_P201790	5.26e-07	2.69239	mRNA	PPP1R12B
LNCA_33_P3209321	8.35e-05	0.400703	mRNA	LOC729558
LNCA_33_P3382399	2.49e-05	0.496723	mRNA	KRTAP3-1
LNCA_23_P381261	4.84e-06	2.84893	mRNA	ADCY4
LNCA_23_P127948	0.000167232	2.77439	mRNA	ADM
LNCA_33_P3389060	8.73e-07	2.43353	mRNA	CDK5RAP2
LNCA_32_P147078	5.45e-07	3.18711	mRNA	SLC8A1
LNCA_23_P108265	0.000122469	0.469895	mRNA	OR7C2
LNCA_23_P139099	3.49e-07	0.411146	mRNA	OR4A15
LNCA_24_P54808	2.24e-07	2.9627	mRNA	KLHL8
LNCA_33_P3268005	2.81e-05	2.24873	mRNA	FAM120AOS
LNCA_21_P0003435	6.02e-06	0.458552	mRNA	XLOC_003824
LNCA_23_P319005	4.28e-06	0.499645	mRNA	HMP19
LNCA_23_P259611	5.49e-07	3.54619	mRNA	TXNDC3
LNCA_21_P0000163	2.6e-07	0.473729	mRNA	RNF223
LNCA_23_P38864	8.73e-07	2.13378	mRNA	RABAC1
LNCA_33_P3270404	4.48e-07	2.06452	mRNA	ATG9A
LNCA_33_P3302325	2.63e-05	0.350428	mRNA
LNCA_23_P134935	0.000122703	0.462684	mRNA	DUSP4
LNCA_23_P19333	8.84e-06	2.62632	mRNA	TREM1
LNCA_33_P3270628	2.26e-06	0.49846	mRNA
LNCA_33_P3571254	4.41e-08	2.80175	mRNA
LNCA_23_P368711	1.05e-05	2.36247	mRNA	LILRB3
LNCA_23_P47991	1.22e-06	2.66318	mRNA	MED13L
LNCA_33_P3292896	5.09e-07	0.459262	mRNA	SFXN5
LNCA_23_P64661	9.79e-07	2.16465	mRNA	ARHGAP9
LNCA_23_P160025	0.000272873	2.0647	mRNA	IFI16
LNCA_24_P142743	7.04e-06	2.06151	mRNA	CNN2
LNCA_32_P42574	3.16e-05	0.412317	mRNA	C1orf198
LNCA_21_P0006753	1.19e-08	0.419002	mRNA	XLOC_008794
LNCA_23_P89981	3.83e-05	0.488211	mRNA	CYP2F1
LNCA_21_P0002436	3.31e-06	0.440105	mRNA	XLOC_002081
LNCA_23_P426944	9.26e-05	0.377456	mRNA	PAX9
LNCA_33_P3273732	2.31e-05	0.462414	mRNA
LNCA_23_P9135	4.26e-07	5.65537	mRNA	CNTNAP3
LNCA_33_P3349045	1.68e-08	3.20092	mRNA	IL4R
LNCA_23_P423197	2.5e-05	2.04394	mRNA	RXRA
LNCA_24_P294842	6.98e-09	2.14751	mRNA	ATXN1
LNCA_23_P97906	1.05e-07	2.34711	mRNA	NT5C2
LNCA_21_P0006380	6.14e-08	0.434471	mRNA	XLOC_007745
LNCA_33_P3293760	1.13e-05	0.448745	mRNA	KRTAP10-8
LNCA_33_P3422728	7.79e-07	6.38007	mRNA	CNTNAP3
LNCA_33_P3300495	0.00556798	2.01064	mRNA
LNCA_33_P3215392	3.09e-07	0.495126	mRNA	EXOC3L2
LNCA_33_P3414912	5.18e-08	2.31245	mRNA	NPL
LNCA_24_P160202	0.0037265	0.41008	mRNA	PANX2
LNCA_23_P68601	7.06e-08	3.47664	mRNA	CST7
LNCA_33_P3367917	2.45e-07	2.42855	mRNA	SSH2
LNCA_23_P360874	6.94e-07	3.00035	mRNA	LRWD1
LNCA_33_P3270311	6.38e-06	5.03559	mRNA	HECW2
LNCA_23_P385063	1.33e-08	2.01697	mRNA	DNAJB6
LNCA_21_P0001037	2.69e-05	0.408845	mRNA	XLOC_000498
LNCA_24_P417706	7.12e-06	3.30639	mRNA	MXD3
LNCA_24_P14731	2.47e-06	0.393888	mRNA	PCSK1N
LNCA_23_P48455	6.08e-06	0.414838	mRNA	AMN
LNCA_33_P3263027	3.54e-10	0.400598	mRNA
LNCA_33_P3281176	6.8e-09	0.42603	mRNA
LNCA_23_P207842	0.00137385	0.393152	mRNA	RARA
LNCA_24_P350245	5.71e-06	2.08293	mRNA	DOCK5
LNCA_21_P0011235	0.000106318	0.404838	mRNA	XLOC_l2_004115
LNCA_23_P204564	1.62e-08	2.4747	mRNA	PPP1R12A
LNCA_24_P237175	1.37e-07	0.409918	mRNA	CST2
LNCA_33_P3234377	6.69e-05	0.479863	mRNA
LNCA_33_P3249731	2.59e-06	2.00445	mRNA
LNCA_24_P16214	3.51e-07	0.487432	mRNA	LOC100506930
LNCA_23_P93383	1.39e-07	2.47186	mRNA	RGL2
LNCA_33_P3281667	8.71e-09	4.44784	mRNA	CNTNAP3B
LNCA_33_P3413671	2.3e-08	2.14753	mRNA	ABL2
LNCA_24_P339514	9.04e-06	0.420853	mRNA	CYP2B6
LNCA_33_P3334743	3.78e-07	2.35288	mRNA	RAPGEF2
LNCA_33_P3398998	2.7e-08	0.473029	mRNA	C2orf50
LNCA_33_P3297302	2.45e-05	0.440133	mRNA	ELMOD3
LNCA_24_P226108	5.01e-07	2.95356	mRNA	RBM47
LNCA_33_P3304769	7.11e-08	2.96462	mRNA
LNCA_33_P3390217	5.01e-08	0.426352	mRNA	TTLL9
LNCA_33_P3797403	1.79e-08	0.48458	mRNA	LOC283387
LNCA_23_P304511	8.12e-06	2.07852	mRNA	ZNF397
LNCA_21_P0010682	1.77e-06	2.46743	mRNA	XLOC_l2_000001
LNCA_21_P0011873	2.5e-07	0.437534	mRNA	XLOC_l2_007767
LNCA_33_P3244181	4.01e-07	2.27738	mRNA	HSBP1
LNCA_33_P3377911	1.49e-07	2.80104	mRNA
LNCA_33_P3316786	2.6e-10	5.08291	mRNA	DACH1
LNCA_23_P19886	0.000201953	0.409261	mRNA	NPSR1
LNCA_32_P40744	8.11e-09	0.474442	mRNA
LNCA_23_P166408	1.74e-05	3.90542	mRNA	OSM
LNCA_23_P217109	1.43e-05	2.72561	mRNA	SLC31A2
LNCA_24_P353619	1.16e-09	6.19314	mRNA	ALPL
LNCA_23_P302470	2.74e-08	4.49356	mRNA	SULT1B1
LNCA_33_P3234043	1.42e-09	0.480624	mRNA	BMP1
LNCA_23_P63870	1.44e-08	2.60844	mRNA	SAMD8
LNCA_24_P76995	2.04e-07	2.57778	mRNA	ZDHHC17
LNCA_33_P3217619	3.7e-08	0.291507	mRNA
LNCA_33_P3313519	2.82e-06	0.459579	mRNA	CHRFAM7A
LNCA_33_P3267081	1.32e-06	0.393945	mRNA	ZNF771
LNCA_32_P360193	3.23e-09	0.463602	mRNA	DNHD1
LNCA_33_P3308263	1.04e-06	2.11463	mRNA	DIRC2
LNCA_24_P261259	1.08e-07	5.20399	mRNA	PFKFB3
LNCA_24_P253818	1.03e-07	4.20311	mRNA	FLOT2
LNCA_23_P69810	6.91e-06	2.20926	mRNA	AGPAT9
LNCA_23_P34233	8.69e-06	0.358389	mRNA	QPRT
LNCA_33_P3805085	1.07e-08	2.37927	mRNA	FNIP1
LNCA_24_P122137	7.05e-08	0.439126	mRNA	LIF
LNCA_33_P3327617	8.36e-06	2.7709	mRNA	FCGR2C
LNCA_23_P408271	1.95e-07	2.50948	mRNA	HSD17B11
LNCA_21_P0011779	1.29e-06	0.488306	mRNA	LOC100506930
LNCA_23_P142205	6.45e-06	2.17663	mRNA	LILRA2
LNCA_23_P36724	0.000161034	0.453656	mRNA	FBXL14
LNCA_32_P86739	3.42e-06	0.389719	mRNA	C10orf114
LNCA_21_P0000022	4.94e-05	2.50097	mRNA	BRI3
LNCA_21_P0013471	2.75e-07	0.492611	mRNA	XLOC_l2_014171
LNCA_23_P169278	9.43e-06	2.07092	mRNA	AGTPBP1
LNCERCC-00019_219	1.96e-09	0.470082	mRNA
LNCA_33_P3354940	4.93e-08	0.471354	mRNA	CSF1
LNCA_33_P3366195	1.72e-06	0.481072	mRNA	ARNT2
LNCA_24_P52293	2.33e-06	0.394269	mRNA	OR2A25
LNCA_33_P3232993	1.51e-06	2.09546	mRNA	MARK2
LNCA_23_P49546	3.93e-08	0.455797	mRNA	GRIN2C
LNCA_21_P0001844	3.66e-06	0.482567	mRNA	XLOC_001392
LNCA_24_P36868	2.73e-08	2.14272	mRNA	WDR26
LNCA_33_P3224819	2.79e-06	2.12849	mRNA	SLC45A4
LNCA_23_P502336	2.04e-08	3.01614	mRNA	EMR2
LNCA_32_P157213	0.000131829	6.78752	mRNA
LNCA_23_P100632	4.11e-05	2.27733	mRNA	HN1
LNCA_23_P99163	4.36e-07	2.32822	mRNA	DRAM1
LNCA_23_P406071	4.17e-07	2.02807	mRNA	ZFP36L1
LNCA_23_P217778	8.23e-07	2.75973	mRNA	MSL3
LNCA_33_P3293307	2.55e-06	0.294545	mRNA
LNCA_23_P169494	0.000119493	6.96319	mRNA	ORM1
LNCA_23_P321949	3.38e-06	0.449941	mRNA	PLA2G2A
LNCA_23_P250283	5.26e-09	2.02363	mRNA	RAB1A
LNCA_24_P10233	2.99e-06	3.25348	mRNA	DAPK2
LNCA_23_P14667	1.87e-06	0.401759	mRNA	SLC28A1
LNCA_33_P3424467	0.000139962	0.390763	mRNA	CNST
LNCA_33_P3260175	0.000306278	0.301346	mRNA	LOC100132147
LNCA_32_P154342	0.000414985	2.07846	mRNA	SLCO4C1
LNCA_33_P3374338	1.44e-05	2.23191	mRNA
LNCA_33_P3395859	3.72e-08	0.463792	mRNA	LOC147646
LNCA_23_P83110	3e-06	2.55035	mRNA	CDK5RAP2
LNCA_32_P70724	1.36e-08	2.24819	mRNA	KDM5B
LNCA_21_P0013629	1.84e-06	5.52135	mRNA	CNTNAP3
LNCA_32_P515971	5.58e-07	0.254167	mRNA	EFCAB3
LNCA_33_P3884005	1.44e-08	2.64066	mRNA	LOC93444
LNCA_23_P138194	3.47e-05	2.06108	mRNA	NCF2
LNCA_23_P111517	1.4e-05	0.474817	mRNA	WBSCR17
LNCA_33_P3296940	8.22e-07	2.47624	mRNA	FNDC3B
LNCA_23_P311616	4.22e-09	2.35384	mRNA	JMJD6
LNCA_24_P373174	2.06e-08	2.38556	mRNA	RAB27A
LNCA_24_P307808	2.44e-09	0.376944	mRNA	KCTD16
LNCA_33_P3338956	1.85e-10	2.07448	mRNA	ARL8B
LNCA_23_P252193	4.8e-07	0.467709	mRNA	ITGA9
LNCA_23_P258088	6.07e-06	0.30571	mRNA	PACSIN1
LNCA_33_P3359869	1.31e-08	2.16211	mRNA
LNCA_23_P75973	1.46e-08	0.461565	mRNA	RNF121
LNCA_23_P164258	4.48e-09	0.476715	mRNA	PIPOX
LNCA_19_P00322624	7.98e-05	0.336079	mRNA
LNCA_21_P0011501	1.4e-06	2.60269	mRNA	XLOC_l2_005350
LNCA_23_P10559	8.45e-06	2.42454	mRNA	AATK
LNCA_24_P413669	0.000130174	14.318	mRNA	PFKFB2
LNCA_33_P3346461	3.44e-06	3.83136	mRNA
LNCA_33_P3371237	0.000618059	0.295302	mRNA
LNCA_23_P76851	2.33e-07	2.3952	mRNA	PRMT5
LNCA_24_P233786	2.02e-06	2.6061	mRNA	FAM129A
LNCA_23_P502047	9.24e-06	0.47088	mRNA	CHRD
LNCA_23_P45099	0.000187374	0.457762	mRNA	HLA-DRB5
LNCA_23_P119222	0.000950047	5.87891	mRNA	RETN
LNCA_33_P3289661	7.45e-08	3.05598	mRNA	OCR1
LNCA_23_P417921	2.26e-07	0.420208	mRNA	DNAJC5G
LNCA_23_P258493	5.44e-07	4.71624	mRNA	LMNB1
LNCA_33_P3267640	0.000229161	0.437786	mRNA	HGFAC
LNCA_24_P59667	3.7e-06	2.33243	mRNA	JAK3
LNCA_32_P143000	1.98e-07	0.402945	mRNA	FAM189A1
LNCA_33_P3266848	8.05e-05	0.475352	mRNA
LNCA_23_P64721	0.000102564	2.30807	mRNA	HCAR3
LNCA_23_P115375	8.17e-06	2.10497	mRNA	HIST2H3D
LNCA_23_P14174	0.000669876	2.23737	mRNA	TNFSF13B
LNCA_23_P348121	5.22e-08	3.31679	mRNA	FOSL2
LNCA_33_P3418516	1.29e-06	2.291	mRNA	E2F3
LNCA_32_P153773	1.68e-08	0.40133	mRNA	CACNA1B
LNCA_23_P257583	6.89e-07	0.346439	mRNA	DENND2A
LNCA_24_P34611	2.28e-06	0.492225	mRNA	SIX3
LNCA_23_P362759	6.93e-06	4.24969	mRNA	PRDM5
LNCA_21_P0002866	9.47e-07	0.374077	mRNA	XLOC_003190
LNCA_23_P7325	2.01e-05	2.5795	mRNA	BST1
LNCA_21_P0008586	3.09e-05	0.247451	mRNA	XLOC_011171
LNCA_33_P3274184	4.82e-09	0.391886	mRNA
LNCA_21_P0013438	0.000326353	0.488654	mRNA	XLOC_l2_013873
LNCA_33_P3414242	0.00012429	0.424841	mRNA	MOG
LNCA_33_P3302245	6.1e-06	0.490624	mRNA	TMEM59L
LNCA_33_P3381851	3.3e-05	0.453764	mRNA	KRTAP10-10
LNCA_23_P169934	1.43e-09	4.3938	mRNA	RILPL1
LNCA_23_P143650	1.08e-06	2.45744	mRNA	DUSP18
LNCA_23_P118406	4.67e-07	2.47475	mRNA	C17orf62
LNCA_33_P3411985	1.77e-09	0.46184	mRNA	RABGAP1
LNCA_32_P52119	3.24e-09	2.56541	mRNA
LNCA_23_P113825	3.7e-07	2.13096	mRNA	NACC2
LNCA_23_P406521	8.87e-10	2.34355	mRNA	SIRPD
LNCA_23_P69141	1.66e-06	2.03685	mRNA	DYNC1LI1
LNCA_33_P3258542	0.000645338	2.18369	mRNA	SPINK8
LNCA_32_P41604	7.35e-06	3.44353	mRNA	F5
LNCA_23_P43273	8.41e-09	3.41798	mRNA	EXT1
LNCA_33_P3402600	3.93e-10	2.37417	mRNA
LNCA_33_P3357658	3.33e-06	0.442389	mRNA	HMGA2
LNCA_23_P117380	6.41e-07	0.436864	mRNA	FAM181A
LNCA_33_P3232334	0.000546591	0.470252	mRNA
LNCA_23_P126135	0.000445167	2.0462	mRNA	MFN2
LNCA_33_P3327663	3.18e-07	0.488778	mRNA	SUSD4
LNCA_32_P448360	8.9e-05	0.45444	mRNA	C17orf65
LNCA_33_P3260307	0.000206137	0.47697	mRNA	CARHSP1
LNCA_23_P111797	3.67e-06	2.1298	mRNA	DKFZP434F142
LNCA_23_P201747	0.000270271	2.57007	mRNA	PADI2
LNCA_23_P142187	2.23e-08	0.326239	mRNA	HIF3A
LNCA_33_P3411325	4.17e-10	0.436205	mRNA
LNCA_23_P200239	5.79e-09	2.41893	mRNA	YIPF1
LNCA_32_P86150	0.000505179	0.455589	mRNA	CTRB2
LNCA_23_P128940	8.26e-07	2.4353	mRNA	METTL21D
LNCA_33_P3211666	8.3e-06	11.4205	mRNA	IL18R1
LNCA_23_P310972	1.28e-07	0.189628	mRNA	PCDHGB1
LNCA_33_P3396746	0.00116933	0.324585	mRNA	KIF26B
LNCA_24_P56130	3.04e-06	2.11083	mRNA	MYL6
LNCA_24_P414371	4.75e-09	2.0965	mRNA	PPP3CA
LNCA_23_P137935	0.000156672	2.30181	mRNA	MNDA
LNCA_23_P10442	2.16e-07	3.44749	mRNA	OSBPL1A
LNCA_23_P431933	0.000423396	2.77503	mRNA	CAMKK1
LNCA_23_P423331	7.67e-05	2.80792	mRNA	NTNG2
LNCA_33_P3679901	3.67e-07	0.243322	mRNA
LNCA_33_P3305320	2.44e-05	0.395828	mRNA
LNCA_23_P376557	5.54e-07	3.63086	mRNA	MMP25
LNCA_23_P101434	5.58e-07	3.15116	mRNA	NLRP12
LNCA_33_P3358295	1.41e-07	2.20497	mRNA	ABTB1
LNCA_33_P3317387	4.27e-09	2.71406	mRNA	DNAJC3
LNCA_21_P0010728	2.32e-05	3.46057	mRNA	FCGR1B
LNCA_23_P357374	0.00188554	0.442998	mRNA	PTH2
LNCA_23_P302116	8.14e-10	2.36165	mRNA	PPFIA1
LNCA_24_P382287	1.94e-08	0.346378	mRNA	CDH7
LNCA_33_P3375934	8.37e-05	2.51045	mRNA	NAMPT
LNCA_33_P3389802	9.25e-06	2.09696	mRNA
LNCA_33_P3540143	5.54e-07	2.77527	mRNA	IL17RA
LNCA_33_P3395369	4.13e-07	2.00212	mRNA	AMD1
LNCA_23_P339818	0.000495667	2.31133	mRNA	ARRDC4
LNCA_23_P62335	7.77e-10	2.50362	mRNA	TMLHE
LNCA_21_P0011950	1.92e-08	2.31774	mRNA	XLOC_l2_008203
LNCA_32_P145051	0.000288627	2.16874	mRNA
LNCA_32_P122240	0.000140898	0.401573	mRNA
LNCA_24_P161973	1.99e-06	2.17167	mRNA	ATP11A
LNCA_33_P3315704	4.06e-05	0.373324	mRNA
LNCA_24_P393864	1.48e-06	3.79501	mRNA	PHTF1
LNCA_23_P127385	3.28e-06	2.16706	mRNA	MYBPC3
LNCA_24_P935345	2.92e-05	0.491626	mRNA
LNCA_33_P3324149	9.21e-08	0.472467	mRNA
LNCA_23_P137504	1.02e-07	2.11929	mRNA	ZBTB37
LNCA_33_P3328928	1.29e-06	2.14208	mRNA	BMP2K
LNCA_33_P3281358	8.43e-10	2.39152	mRNA	ARF3
LNCA_33_P3290343	4.9e-09	6.36324	mRNA	CYP1B1
LNCA_23_P146576	4.27e-08	2.01151	mRNA	GBGT1
LNCA_33_P3320953	7.85e-05	0.371172	mRNA	CTXN1
LNCA_24_P15821	3.77e-06	2.00033	mRNA
LNCA_32_P163739	1.28e-06	3.57734	mRNA	KIAA1257
LNCA_33_P3410409	4.74e-06	2.34657	mRNA	LAMP2
LNCA_33_P3377851	2.32e-05	0.490708	mRNA	PNMAL2
LNCA_24_P29733	1.53e-07	2.59706	mRNA	CDK14
LNCA_33_P3462960	7.16e-07	2.41507	mRNA	DNAJC3
LNCA_23_P6818	3.44e-09	0.352537	mRNA	SEMA3G
LNCA_33_P3356577	3.8e-07	2.0422	mRNA
LNCA_23_P47304	5.91e-06	2.47088	mRNA	CASP5
LNCA_19_P00317277	1.02e-05	5.83137	mRNA	LOC100506328
LNCA_19_P00319453	0.00027431	0.374249	mRNA
LNCA_23_P48217	0.0438163	0.455229	mRNA	APOLD1
LNCA_23_P120883	0.000472213	2.11733	mRNA	HMOX1
LNCA_33_P3369153	3.99e-07	2.50282	mRNA	KIF3C
LNCA_32_P137035	1.74e-06	2.57243	mRNA	TRIM27
LNCA_23_P72961	3.42e-08	0.32993	mRNA	PRPS1
LNCA_33_P3256334	0.000582905	0.437685	mRNA	PRB3
LNCA_33_P3262069	5.24e-08	0.421379	mRNA	OR2AG2
LNCA_33_P3321372	1.08e-05	4.6319	mRNA	CNTNAP3
LNCA_33_P3231352	2.98e-06	2.13087	mRNA
LNCA_33_P3325296	1.59e-07	3.06714	mRNA
LNCA_23_P121716	1.84e-07	6.45002	mRNA	ANXA3
LNCA_23_P61551	6.96e-07	2.21936	mRNA	CD2BP2
LNCA_33_P3546070	4.27e-07	2.14056	mRNA	PHF20L1
LNCA_33_P3243069	0.00296336	2.55988	mRNA	KIAA0040
LNCA_21_P0004421	8.24e-05	2.25576	mRNA	XLOC_004924
LNCA_23_P201368	7.76e-07	2.40549	mRNA	CTBS
LNCA_23_P137865	2.72e-08	2.46593	mRNA	MTX1
LNCA_33_P3411805	2.45e-05	0.360862	mRNA
LNCA_33_P3354851	6.18e-07	0.498996	mRNA
LNCA_21_P0012340	5.95e-06	0.440745	mRNA	PI4KA
LNCA_33_P3339388	3.07e-10	2.12782	mRNA	WIPF1
LNCA_24_P227450	5.44e-06	0.490178	mRNA	ACAD10
LNCA_33_P3374623	1.21e-05	2.27901	mRNA	ABCA7
LNCA_23_P210048	1.58e-07	2.41756	mRNA	HDAC4
LNCA_33_P3315856	6.37e-07	2.86036	mRNA	DHX34
LNCA_23_P311632	1e-06	4.35544	mRNA	NLRP6
LNCA_23_P168592	3.88e-07	2.10522	mRNA	CCDC126
LNCA_23_P57856	6.23e-07	4.17392	mRNA	BCL6
LNCA_33_P3298398	3.56e-07	3.75641	mRNA
LNCA_23_P210708	1.93e-06	2.57255	mRNA	SIRPA
LNCA_23_P317465	1.77e-07	2.0558	mRNA	RAB8B
LNCA_21_P0004839	3.59e-05	0.45513	mRNA	XLOC_005176
LNCA_24_P148590	0.000858419	0.454606	mRNA	TACR1
LNCA_24_P15502	0.000711855	2.00067	mRNA
LNCA_23_P419795	5.03e-06	2.26494	mRNA	SBF2
LNCA_23_P4662	2.3e-06	2.94662	mRNA	BCL3
LNCA_33_P3423551	1.38e-05	2.43185	mRNA	IER3
LNCA_23_P208937	7.03e-08	0.445855	mRNA	TLE6
LNCA_24_P85243	7.08e-06	0.49482	mRNA	FAM153A
LNCA_23_P133438	2.81e-07	2.27889	mRNA	FAM105A
LNCA_24_P161144	3.61e-05	0.32124	mRNA	ZNF843
LNCA_23_P29005	0.0011046	3.40891	mRNA	SAMSN1
LNCA_24_P365526	5.33e-06	2.41479	mRNA	HCK
LNCA_23_P53198	3.61e-08	3.64938	mRNA	DGAT2
LNCA_33_P3365845	1.71e-08	2.12097	mRNA	NUPL1
LNCA_23_P7783	5.96e-09	2.02948	mRNA	KDM3B
LNCA_33_P3342096	0.000901818	0.483313	mRNA	ZHX3
LNCA_33_P3372859	5.85e-08	0.365258	mRNA	DDX54
LNCA_21_P0010795	4.9e-09	4.18773	mRNA	XLOC_l2_001399
LNCA_23_P48056	4.3e-06	2.10053	mRNA	CKAP4
LNCA_24_P18105	0.0127391	2.16421	mRNA	ASPH
LNCA_33_P3367830	8.08e-06	2.02835	mRNA	EFEMP2
LNCA_33_P3250398	2.63e-07	2.1394	mRNA	CTSZ
LNCA_33_P3409815	4.26e-07	0.429038	mRNA
LNCA_21_P0006672	4.87e-06	2.01488	mRNA	XLOC_008461
LNCA_24_P314179	1.13e-08	3.27509	mRNA	ETS2
LNCA_33_P3247095	1.64e-05	0.475902	mRNA
LNCA_23_P52031	1.57e-10	2.11704	mRNA	PGM1
LNCA_33_P3335366	4.98e-09	4.37234	mRNA	MAML3
LNCA_33_P3400023	5.32e-05	5.52851	mRNA
LNCA_21_P0010561	4.31e-05	3.47429	mRNA	FCGR1B
LNCA_23_P88381	8.45e-07	2.46274	mRNA	NUMB
LNCA_23_P90497	7.12e-06	2.03426	mRNA	LILRA4
LNCA_23_P426809	9.04e-07	2.40334	mRNA	ARHGEF11
LNCA_23_P136325	6.15e-08	2.01102	mRNA	WIPF2
LNCA_23_P209652	0.000435421	0.469202	mRNA	INO80D
LNCA_24_P38081	7.1e-06	7.45364	mRNA	FKBP5
LNCA_23_P143147	1.5e-08	2.35512	mRNA	TCFL5
LNCA_21_P0005625	1.6e-05	0.362364	mRNA	XLOC_007098
LNCA_23_P36647	2.46e-08	2.08851	mRNA	TMUB2
LNCA_33_P3397051	1.21e-09	2.25331	mRNA	EXOC8
LNCA_23_P63390	4.13e-05	3.39128	mRNA	FCGR1B
LNCA_23_P105957	4.87e-06	2.19259	mRNA	ACTN1
LNCA_23_P41159	7.92e-07	2.27306	mRNA	PPP4R2
LNCA_33_P3216292	6.99e-07	2.40088	mRNA	TBC1D2
LNCA_24_P362904	1.47e-05	2.77689	mRNA	PFKFB4
LNCA_33_P3338793	0.00658713	0.427042	mRNA	KCNC3
LNCA_23_P112004	9.81e-06	5.21111	mRNA	LRRC6
LNCA_33_P3363620	5.97e-07	2.95906	mRNA	TMEM91
LNCA_23_P153026	5.73e-05	2.17122	mRNA	GAA
LNCA_24_P187970	0.000406241	2.48511	mRNA	PADI2
LNCA_23_P33723	1.54e-05	3.45778	mRNA	CD163
LNCA_21_P0012146	2.51e-07	0.495524	mRNA	XLOC_l2_008609
LNCA_33_P3291454	7.51e-06	0.450117	mRNA	C10orf96
LNCA_33_P3295283	9.69e-07	2.14593	mRNA	LPCAT3
LNCA_23_P25605	7.15e-08	4.09524	mRNA	KBTBD7
LNCA_23_P161424	3.91e-06	2.31448	mRNA	PLXDC2
LNCA_32_P902957	9.28e-09	4.06832	mRNA	ARL11
LNCA_23_P408094	1.93e-05	2.6714	mRNA	MXD1
LNCA_23_P94647	0.000346416	0.476667	mRNA	OR1L3
LNCA_24_P154080	1.07e-06	2.77727	mRNA	ECE1
LNCA_23_P15285	3.93e-05	0.378688	mRNA	METTL22
LNCA_33_P3383970	2.06e-07	2.01469	mRNA	TLR10
LNCA_24_P236799	2.44e-05	2.27613	mRNA	RAB31
LNCA_33_P3321225	7.7e-07	0.453525	mRNA
LNCA_24_P202139	1.04e-09	2.46106	mRNA	METTL9
LNCA_23_P216340	1.1e-05	2.86371	mRNA	SLA
LNCA_23_P311087	2.43e-06	2.4294	mRNA	ZNF281
LNCA_23_P163567	0.000219191	0.417163	mRNA	SMPD3
LNCA_23_P411296	9.69e-06	2.81871	mRNA	CEBPB
LNCA_23_P66719	2.34e-08	4.27434	mRNA	DHRS13
LNCA_33_P3214550	1.14e-05	2.51257	mRNA	CXCR2
LNCA_33_P3305998	1.42e-06	0.498444	mRNA
LNCA_23_P106002	0.00101324	2.10862	mRNA	NFKBIA
LNCA_33_P3294237	4.7e-08	2.06846	mRNA	MTF1
LNCA_23_P212089	4.55e-07	2.55212	mRNA	NFKBIZ
LNCA_33_P3335682	2.74e-06	0.48978	mRNA	PPP1R14A
LNCA_24_P273253	4.3e-06	0.458431	mRNA	AHNAK2
LNCA_24_P224727	6.07e-09	3.18726	mRNA	CEBPA
LNCA_23_P218317	1.39e-08	2.86544	mRNA	NARF
LNCA_23_P218549	8.07e-05	2.08572	mRNA	EMR3
LNCA_33_P3294217	0.000182073	0.438508	mRNA	UTF1
LNCA_23_P434809	3.4e-05	3.19029	mRNA	S100A8
LNCA_32_P44394	0.00104275	2.54695	mRNA	AIM2
LNCA_23_P208493	1.76e-05	2.03378	mRNA	LILRB2
LNCA_23_P118061	4.77e-07	2.87405	mRNA	CKLF
LNCA_33_P3316686	1.51e-07	2.67997	mRNA	CYB5R4
LNCA_21_P0005567	0.000462389	0.471663	mRNA	XLOC_006144
LNCA_24_P191013	0.000363498	0.486736	mRNA	CYP4A11
LNCA_24_P143686	6.92e-08	2.60392	mRNA	KIAA0146
LNCA_23_P336554	5.03e-05	2.70472	mRNA	IL1RAP
LNCA_24_P882914	4.59e-06	2.15546	mRNA	C10orf46
LNCA_33_P3374215	2.38e-08	0.485453	mRNA
LNCA_33_P3369245	6.73e-08	0.371702	mRNA	LOC100129826
LNCA_33_P3317005	2.26e-07	4.38632	mRNA	SLC11A1
LNCA_33_P3233055	1.44e-07	0.444462	mRNA
LNCA_33_P3414389	1.14e-05	2.10656	mRNA	SH2B2
LNCA_33_P3242383	1.07e-06	2.495	mRNA	AFF1
LNCA_33_P3418091	5.98e-09	0.414674	mRNA	ISLR2
LNCA_33_P3410093	1.75e-05	2.65481	mRNA	LTA4H
LNCA_23_P40952	1.32e-06	2.30974	mRNA	RAF1
LNCA_23_P321452	1.36e-07	2.36324	mRNA	PDZD8
LNCA_23_P374389	4.74e-05	0.387184	mRNA	PWWP2B
LNCA_24_P348265	1.26e-07	5.66259	mRNA	FCAR
LNCA_23_P108514	1.37e-07	2.10814	mRNA	STK16
LNCA_33_P3773195	1.57e-07	0.461894	mRNA	LOC285762
LNCA_33_P3325429	0.0246434	0.44417	mRNA
LNCA_23_P343935	8.36e-07	2.39043	mRNA	EGLN1
LNCA_32_P70158	4e-05	2.27716	mRNA	LILRB3
LNCA_33_P3396379	2.38e-07	2.32054	mRNA
LNCA_33_P3220833	2.4e-09	2.17084	mRNA	PAK2
LNCA_23_P397120	0.0262029	2.27424	mRNA	C19orf77
LNCA_33_P3265222	0.0020849	3.75802	mRNA	KIAA1324
LNCA_33_P3412016	6.64e-06	2.5218	mRNA	SEMA4B
LNCA_33_P3294377	1.59e-06	0.394702	mRNA
LNCA_33_P3292387	1.95e-05	0.417582	mRNA	LRRIQ3
LNCA_23_P140760	8.18e-05	2.1099	mRNA	GPR97
LNCA_33_P3272189	0.000645279	2.36057	mRNA	MFSD9
LNCA_23_P60387	7.33e-07	2.05436	mRNA	NOTCH1
LNCA_23_P97990	1.78e-06	8.28266	mRNA	HTRA1
LNCA_23_P81717	0.00165835	0.422069	mRNA	FRMD1
LNCA_24_P116669	3.96e-07	2.34586	mRNA	CANT1
LNCA_24_P235429	0.000869487	2.17749	mRNA	ABCA1
LNCA_33_P3354141	8.03e-09	0.398463	mRNA	MAP4
LNCA_33_P3251163	7.89e-06	2.28061	mRNA	RNASET2
LNCA_24_P322741	1.98e-08	2.66318	mRNA	IL10RB
LNCA_23_P55649	6.48e-05	2.32852	mRNA	FPR2
LNCA_19_P00316745	9.43e-08	3.0127	mRNA	LOC100506190
LNCA_33_P3391120	1.67e-06	3.20621	mRNA
LNCA_23_P201238	5.42e-06	2.22847	mRNA	SNX27
LNCA_33_P3265309	7.51e-06	2.13567	mRNA	CEACAM4
LNCA_33_P3301346	1.72e-08	0.233052	mRNA	RBM44
LNCA_24_P206604	2.86e-08	5.3561	mRNA	PFKFB3
LNCA_33_P3222744	7.7e-05	2.42048	mRNA	ZNF117
LNCA_33_P3363168	1.42e-06	2.34943	mRNA	SSH2
LNCA_32_P223140	0.000863679	2.65883	mRNA	RASGEF1A
LNCA_33_P3394599	2.29e-09	0.342604	mRNA	HMG20B
LNCA_33_P3306802	1.06e-05	0.309868	mRNA	LOC100130916
LNCA_24_P359067	2.71e-06	3.34293	mRNA	LOC100130357
LNCA_33_P3407835	1.21e-06	2.02137	mRNA	PPM1M
LNCA_33_P3751889	1.29e-05	2.04224	mRNA	TOM1
LNCA_23_P157513	9.91e-08	0.47701	mRNA	MOS
LNCA_33_P3315331	0.00135452	0.3956	mRNA	CNTD2
LNCA_33_P3374190	2.92e-07	2.14686	mRNA	INPP5A
LNCA_24_P137897	3.68e-07	2.47399	mRNA	IFRD1
LNCA_23_P132910	2.08e-07	2.89154	mRNA	RBM47
LNCA_33_P3335461	0.000862501	0.418641	mRNA
LNCA_24_P321634	1.3e-09	2.23513	mRNA	ZMYM5
LNCA_33_P3335042	1.28e-06	2.0597	mRNA	HSD17B12
LNCA_33_P3338071	8.46e-05	2.67769	mRNA
LNCA_23_P49842	7.26e-06	2.04931	mRNA	UNC119
LNCA_23_P85903	6.08e-10	8.10331	mRNA	TLR5
LNCA_24_P320604	0.00297709	0.444489	mRNA	ARMC2
LNCA_23_P147805	2.77e-07	2.96394	mRNA	UPP1
LNCA_23_P122947	5.97e-09	2.01009	mRNA	AVL9
LNCA_33_P3236030	6.76e-08	5.14116	mRNA	ARHGAP24
LNCA_32_P194779	6.31e-07	2.12746	mRNA	ZBTB34
LNCA_33_P3252146	0.000222455	0.411846	mRNA	HMX3
LNCA_33_P3361851	3.75e-06	2.38999	mRNA	RAB7A
LNCA_24_P97526	1.42e-07	2.29556	mRNA	CMTM6
LNCA_23_P99397	3.35e-06	2.05399	mRNA	ZDHHC20
LNCA_33_P3764802	0.0016273	2.35842	mRNA	SIRT5
LNCA_24_P200023	1.83e-05	2.87624	mRNA	IL1R1
LNCA_21_P0002837	0.00230552	0.412909	mRNA	XLOC_003021
LNCA_23_P93823	1.97e-08	2.22347	mRNA	RFC2
LNCA_21_P0011262	8.81e-07	2.8777	mRNA	XPO6
LNCA_23_P117515	7.8e-09	2.08037	mRNA	ARID4A
LNCA_33_P3399598	0.000811381	0.451974	mRNA	ABCD4
LNCA_23_P256231	4.76e-07	2.3078	mRNA	FBXO30
LNCA_32_P116206	0.000223806	2.31388	mRNA	RELL1
LNCA_23_P100141	1.24e-07	2.6394	mRNA	UNKL
LNCA_32_P511713	1.3e-06	0.495099	mRNA	C11orf42
LNCA_24_P280113	7.85e-05	2.46501	mRNA	IL13RA1
LNCA_33_P3441576	0.0011932	2.04093	mRNA	SRGAP2P1
LNCA_23_P373031	3.64e-05	0.496298	mRNA	CACNA1C
LNCA_24_P213763	6.06e-10	3.13264	mRNA
LNCA_24_P58331	0.00540705	0.419447	mRNA	DCAKD
LNCA_24_P231546	6.08e-05	0.37294	mRNA	FAM178B
LNCA_23_P97932	4.19e-06	2.68063	mRNA	MSRB2
LNCA_23_P329198	3.95e-06	2.79362	mRNA	OBFC2A
LNCA_24_P160696	6.13e-06	0.432479	mRNA	C3orf15
LNCA_19_P00317128	1.05e-07	2.55331	mRNA	LOC100506190
LNCA_33_P3297611	5.45e-06	0.478114	mRNA
LNCA_33_P3288484	0.000196165	0.409402	mRNA	LYRM2
LNCA_21_P0012992	6.97e-07	3.98995	mRNA	NAIP
LNCA_24_P71700	7.11e-07	2.16627	mRNA	ZBTB47
LNCA_23_P12784	4.28e-06	2.42279	mRNA	FRAT2
LNCA_33_P3273255	4.33e-07	0.472279	mRNA
LNCA_33_P3236259	0.000571423	0.398351	mRNA
LNCA_23_P69339	3.07e-08	2.20159	mRNA	ACAA1
LNCA_23_P363968	1.97e-08	3.3647	mRNA	C1RL
LNCA_33_P3317473	0.00133698	0.303934	mRNA
LNCA_24_P230948	0.0169449	0.3535	mRNA	PER3
LNCA_24_P363896	8.04e-06	0.416399	mRNA	COL27A1
LNCA_24_P119685	0.000157607	0.467286	mRNA	OBSCN
LNCA_23_P159125	1.07e-05	2.17257	mRNA	SLC16A5
LNCA_23_P141021	6.6e-07	2.80775	mRNA	LPCAT2
LNCA_24_P374319	1.71e-06	2.2012	mRNA	RAP2C
LNCA_23_P207400	1.56e-06	2.42695	mRNA	BRCA1
LNCA_32_P159612	1.28e-05	0.33891	mRNA	ACCN1
LNCA_23_P16415	9.89e-08	0.47846	mRNA	LRP3
LNCA_33_P3288774	5.4e-10	2.29403	mRNA	RC3H1
LNCA_23_P130553	1.1e-05	2.3595	mRNA	SHKBP1
LNCA_33_P3304369	0.00192885	16.2275	mRNA
LNCA_23_P384517	1.69e-07	4.47202	mRNA	GYG1
LNCA_23_P60248	1.85e-06	2.96964	mRNA	TXN
LNCA_23_P158596	7.31e-07	2.36474	mRNA	AGTRAP
LNCA_24_P126471	1.02e-07	2.37523	mRNA	SLC12A9
LNCA_33_P3252989	3e-09	2.05349	mRNA	KIAA0913
LNCA_23_P215549	1.69e-07	0.351364	mRNA	PON3
LNCA_24_P154037	4.95e-05	3.87881	mRNA	IRS2
LNCA_21_P0001084	2.82e-07	3.20743	mRNA	XLOC_000659
LNCA_32_P117313	3.18e-06	2.69075	mRNA	C8orf83
LNCA_33_P3272921	3.96e-07	2.36119	mRNA	ARID3A
LNCA_33_P3220425	1.18e-07	2.32262	mRNA
LNCA_21_P0000139	9.16e-05	0.471422	mRNA	DKKL1
LNCA_33_P3315303	0.000113429	0.438389	mRNA	KRT73
LNCA_33_P3344574	1.08e-06	0.407795	mRNA	SFTPA2
LNCA_33_P3324495	0.000465346	0.210681	mRNA	ZFP41
LNCA_23_P8185	9.41e-06	2.22877	mRNA	DYNLT1
LNCA_33_P3378101	0.000516415	0.476925	mRNA	AGBL4
LNCA_23_P216094	6.81e-09	6.83147	mRNA	ASPH
LNCA_23_P162211	8.63e-08	3.77481	mRNA	MANSC1
LNCA_33_P3335596	4e-07	2.32183	mRNA	C17orf62
LNCA_23_P24784	3.87e-06	2.43596	mRNA	TNNI2
LNCA_24_P636974	1.79e-06	2.92658	mRNA
LNCA_33_P3255194	7.9e-05	0.483764	mRNA	OSBPL6
LNCA_21_P0000109	0.000300911	0.271256	mRNA	MTRNR2L9
LNCA_33_P3367681	0.000230328	0.341481	mRNA
LNCA_21_P0010727	8.44e-06	4.27493	mRNA	XLOC_l2_000423
LNCA_21_P0013195	2.5e-09	4.89155	mRNA	14-Sep
LNCA_23_P110473	4.5e-07	3.71369	mRNA	NAIP
LNCA_33_P3420068	2.5e-09	2.04478	mRNA	GOLGA7
LNCA_19_P00318915	0.000138621	0.479121	mRNA	Q9EPR2
LNCA_23_P20225	3.68e-07	2.3676	mRNA	RRM2B
LNCA_24_P69538	1.04e-05	3.49409	mRNA	TLR4
LNCA_33_P3384710	1.17e-06	0.230546	mRNA	C17orf63
LNCA_33_P3311403	5e-07	3.33475	mRNA	MRVI1
LNCA_23_P81369	3.24e-05	2.39276	mRNA	ADAM19
LNCA_23_P122007	0.000228072	3.68119	mRNA	C5orf30
LNCA_23_P56590	1.03e-07	2.1143	mRNA	C1D
LNCA_33_P3393684	1.32e-08	3.3805	mRNA	VSIG8
LNCA_24_P136866	1.57e-08	4.773	mRNA	SLC8A1
LNCA_33_P3413394	1.13e-05	0.49803	mRNA	ZACN
LNCA_33_P3397599	0.000577827	2.22276	mRNA	LILRA6
LNCA_23_P139722	1.07e-08	2.58785	mRNA	TNFRSF1A
LNCA_23_P110345	3.29e-07	2.28408	mRNA	CHIC2
LNCA_21_P0000171	3.56e-06	2.41459	mRNA	IL6R
LNCA_24_P298420	2.75e-08	2.36183	mRNA	PRMT5
LNCA_23_P8281	6.78e-05	2.4738	mRNA	IFNGR1
LNCA_23_P367899	4.3e-06	2.01665	mRNA	EPOR
LNCA_33_P3320772	1.48e-08	2.25966	mRNA	ATXN1
LNCA_23_P208293	4.97e-06	3.73726	mRNA	PVRL2
[truncated: 881 more rows]
