# Supplementary material for: Construction and Comprehensive Analysis of Dysregulated Long Noncoding RNA-Associated Competing Endogenous RNA Network in Moyamoya Disease
Source: Comput Math Methods Med. 2020 Jun 13;2020:2018214. doi: 10.1155/2020/2018214 (PMC7306867; doi:10.1155/2020/2018214)
Supplement: Supplementary Materials — Table S1: DEmRNA list in excel file. Table S2: DElncRNA list in excel file. Table S3: increased miRNA list in excel file. Table S4: decreased miRNA list in excel file. Table S5: drugs in excel file. Figure S1: DElncRNA and DemiRNA in tiff format. [file 2018214.f1.zip › Table S2-DElncRNAs.xlsx]

## Sheet: Sheet 1
ProbeName	pvalues	foldchange	type	GeneSymbol	ID	SPOT_ID	CONTROL_TYPE	GENE_TYPE	REFSEQ	GB_ACC	RESULT_SOURCE	PROTEIN_CODING_MRNA	GENE_SYMBOL	GENE_NAME	GO	CHR	START	END	STRAND	RELATIONSHIP	ASSOCIATED_GENE	ASSOCIATED_GENE_STRAND	ASSOCIATED_GENEID	ASSOCIATED_GENE_NAME	SEQUENCE
CUST_48426_PI429285431	0.000217352	2.53921	lncRNA		CUST_48426_PI429285431	CUST_48426_PI429285431	FALSE	lncRNA	hg19_lincRNAsTranscripts_TCONS_l2_00002197 range=chr1:149369294-149378365 5'pad=0 3'pad=0 strand=+ repeatMasking=none		UCSC	-				chr1	149369294	149370139	+	intergenic					TACAAACATCCAAAAGTTCAACAACACCAGTCTAACCAGAACTGTGTGTCTCATGGTATA
CUST_24816_PI429285431	8.45e-08	0.329588	lncRNA		CUST_24818_PI429285431	CUST_24818_PI429285431	FALSE	lncRNA	lnc-CYB5D2-2:1		lncipedia2.1	-				chr17	4067960	4068471	+	exonic_antisense	ANKFY1	-	51479	ankyrin repeat and FYVE domain containing 1	TAACTTCTGGGAATTTCAGGGTTTTTATCTTGCCAGTCAAGCTCTCCCCTTTCCCAAGAC
CUST_39248_PI429285431	0.000232995	0.264558	lncRNA		CUST_39248_PI429285431	CUST_39248_PI429285431	FALSE	lncRNA	n386108|NULL|lncRNA|Homosapiens||UCSCGeneNoncode|uc010bao.1||0.5411530|-0.2342201		NONCODERv3	-				chr15	32888448	32889659	+	intergenic					CCATCACCTTATTTGACTCTCCCCACAGAAACAACAGAAGAAACAAGTGGAACATCAGCT
CUST_36065_PI429285431	5.34e-06	0.456045	lncRNA		CUST_36065_PI429285431	CUST_36065_PI429285431	FALSE	lncRNA	n344657|NULL|lincRNA|Homosapiens|HumanlincRNA|ScriptureReconstructionLincRNAsByLuo[unpublished]|linc_luo_206|NULL|-1.3266800|-0.3477592		NONCODERv3	-				chr15	29969379	29970662	-	intergenic					TTTAAAATAAGTATCTCTGAAATGCCACGCAGCTTCCTCCTTTCCCTCTGAATCACCATT
CUST_44237_PI429285431	1.16e-05	2.01042	lncRNA		CUST_44237_PI429285431	CUST_44237_PI429285431	FALSE	lncRNA	"gi|392306975|ref|NR_003111.2| Homo sapiens ribosomal protein L32 pseudogene 3 (RPL32P3), non-coding RNA"		ncbi	-				Chr3	129101677	129103755	-	intergenic					AATTCTCAGGGAGTGTTTTGGTGATACAGGCTGGGGAGTTAAATAAATGAACGAATAAAC
LNCA_21_P0010046	1.78e-08	0.499346	lncRNA	XLOC_013770	LNCA_21_P0014172	LNCA_21_P0014172	FALSE	lncRNA	XR_108687	XR_108687	Agilent_HUMAN_G3V2	-	LOC100507025			chr6	26281286	26281345	-	intergenic					TTGCCTAGTTCTGTCCCACAGATTTCCAATAAAAGGTGAATAAAATCAGGTCACTCTTCT
CUST_34416_PI429285431	9.95e-08	3.47909	lncRNA		CUST_34416_PI429285431	CUST_34416_PI429285431	FALSE	lncRNA	n341286|BC036938|mRNAlikelncRNA|Homosapiens|HumanlncRNA|JounralRNA|3755|NULL|1.5267600|-0.2425696		NONCODERv3	-				chr7	102613968	102615063	+	intronic_antisense	FBXL13	-	222235	F-box and leucine-rich repeat protein 13	GCTTATCCCACTGATTCTGATCTGACTGTGTTAAGTAATAAATCATGTGGTTACATATTC
CUST_15100_PI429285431	1.29e-07	0.44682	lncRNA		CUST_15100_PI429285431	CUST_15100_PI429285431	FALSE	lncRNA	lnc-TRIB1-2:1		lncipedia2.1	-				chr8	126485378	126485783	+	intergenic					TTACTGAAATACTAACATGCTCTTTATGGGTTAGTAACTCCCTTCACCTCCCCAACGGCT
CUST_21361_PI429285431	2.37e-08	0.320132	lncRNA		CUST_21361_PI429285431	CUST_21361_PI429285431	FALSE	lncRNA	lnc-AL139147.1-1:1		lncipedia2.1	-				chr1	66516214	66516669	-	intronic_antisense	PDE4B	+	5142	"phosphodiesterase 4B, cAMP-specific (phosphodiesterase E4 dunce homolog, Drosophila) (EC:3.1.4.17)"	ACCGAGCTCTGGCCATGCCTTATACTTTCTTTTAACTTATTGTTCTGCCCTTTGAATTCA
CUST_42828_PI429285431	7.31e-07	2.1185	lncRNA		CUST_42828_PI429285431	CUST_42828_PI429285431	FALSE	lncRNA	ENST00000516768 ncrna:snoRNA chromosome:GRCh37:17:58308877:58309007:-1 gene:ENSG00000252577 gene_biotype:snoRNA transcript_biotype:snoRNA		ensembl.GRCh37.72	-				chr17	58308877	58309007	-	intronic_sense	USP32	-	84669	ubiquitin specific peptidase 32 (EC:3.1.2.15)	GAGGATCGTCGTCAGGACTGCCACGAGTGGGGCAGCCTTGTTTTCCTGCCTCAGACATGT
CUST_48043_PI429285431	4.56e-09	0.3476	lncRNA		CUST_48043_PI429285431	CUST_48043_PI429285431	FALSE	lncRNA	"gi|397138737|ref|XR_110648.2| PREDICTED: Homo sapiens uncharacterized LOC100506098, transcript variant 3 (LOC100506098), misc_RNA"		ncbi	-													CCAAGGCATAGTTTTGTCCCTAAGTCCCATGAATATGTAATATTTTGTGTCTCTCTATTA
CUST_33426_PI429285431	0.00085487	2.8696	lncRNA		CUST_33428_PI429285431	CUST_33428_PI429285431	FALSE	lncRNA	n340157|BC017894|mRNAlikelncRNA|Homosapiens|HumanlncRNA|JounralRNA|2617|NULL|-1.3524300|-0.3614782		NONCODERv3	-				chr10	120451872	120453075	-	intronic_sense	CACUL1	-			TGCCCTTGATACAGGTGGGTGTTAATTCTCTTTAATGTTCACTGAATAAAAAGGAGAGAG
CUST_36879_PI429285431	1.76e-07	0.472986	lncRNA		CUST_3687_PI429285431	CUST_3687_PI429285431	FALSE	lncRNA	"transcript_id ""ENST00000422732.2"" | genecode_v17"		gencode_v17	-				chr10	47096454	47099330	-	intergenic					CCCATATTCTTCATCTTGTTCCCTGGGATCTTTCTCCCTAATAAAGGAAAAGCTCATAGA
CUST_40425_PI429285431	2.2e-09	0.489487	lncRNA		CUST_40425_PI429285431	CUST_40425_PI429285431	FALSE	lncRNA	n409293|NR_033579|lncRNA|Homosapiens||RefGeneNoncode|NR_033579||13.8952000|-0.1150642		NONCODERv3	-				chr15	82759446	82760252	+	intergenic					TCACTCCCTATGGTGTCTGTCTGTCCTGAGAGGTGGATGAATTGAAGCTCTAGTTTCTCT
CUST_15097_PI429285431	2.94e-08	0.41628	lncRNA		CUST_1509_PI429285431	CUST_1509_PI429285431	FALSE	lncRNA	"transcript_id ""ENST00000486545.1"" | genecode_v17"		gencode_v17	-				chr3	154687072	154687592	-	intergenic					CTGTTGATTGCGATTTCTGTTTGAAAATGGAATCTTGAGCATCTGTTCTCTCCTTTTATA
CUST_9785_PI429285431	2.91e-11	2.53789	lncRNA		CUST_9785_PI429285431	CUST_9785_PI429285431	FALSE	lncRNA	lnc-SYF2-1:4		lncipedia2.1	-				chr1	25593202	25593584	-	intergenic					TGAAAAAACTGGAAACCATATGCATGTCCATGAATAAAAAATGGGGCATAGGCCGGGCGC
CUST_25319_PI429285431	3.95e-07	0.498412	lncRNA		CUST_25319_PI429285431	CUST_25319_PI429285431	FALSE	lncRNA	lnc-ZSCAN10-3:9		lncipedia2.1	-				chr16	3179462	3179922	-	intergenic					GAAGGTTCGGGGCAGGGGTCATTTCAGCTACTGGGCACCAGTCTCCTCCTCATGTTTATC
CUST_37392_PI429285431	2.71e-06	0.372698	lncRNA		CUST_37393_PI429285431	CUST_37393_PI429285431	FALSE	lncRNA	n345845|NULL|lincRNA|Homosapiens|HumanlincRNA|ScriptureReconstructionLincRNAsByLuo[unpublished]|linc_luo_1394|NULL|-1.2709700|-0.2052215		NONCODERv3	-				chr2	8279455	8280593	+	intergenic					TTTGGTCCTAGGTCCTAAATCTCCCTGCTTTCTGGCATATCATCTTACGGCTCTTATAGG
LNCA_21_P0010399	5.65e-05	0.476964	lncRNA	XLOC_014174	LNCA_21_P0014503	LNCA_21_P0014503	FALSE	lncRNA	XR_110124	XR_110124	Agilent_HUMAN_G3V2	-	LOC100507398	uncharacterized LOC100507398		chr13	52028785	52028844	+	intergenic					TGAGGATGTACTGTGTATTAGGTGTGGTGCATATAAAAAATAAATAAAATGTGGTCCCTG
LNCA_21_P0002596	1.41e-07	3.49963	lncRNA	XLOC_001496	LNCA_21_P0005453	LNCA_21_P0005453	FALSE	lncRNA			Agilent_HUMAN_G3V2	-	XLOC_006312			chr7	156776876	156776935	+	intergenic					TTCTCTGTATTGAAAACCAAATTGTCACGGACCACTCCCATTCTCACGCAGCATTTAGGG
CUST_41033_PI429285431	3.2e-07	0.376488	lncRNA		CUST_41033_PI429285431	CUST_41033_PI429285431	FALSE	lncRNA	n411676|NR_040535|lncRNA|Homosapiens||RefGeneNoncode|NR_040535||0.0040703|-0.2305527		NONCODERv3	-				chr22	39828164	39831163	+	intronic_sense	TAB1	+			TTTTCTTCATGTGTCATGAAGTTTCCTCCTGATTTTCAGAGACCCTTCCAGGCCTGCAAG
CUST_48066_PI429285431	0.000105688	2.22569	lncRNA		CUST_48066_PI429285431	CUST_48066_PI429285431	FALSE	lncRNA	"gi|397138185|ref|XR_159397.1| PREDICTED: Homo sapiens uncharacterized LOC100996866 (LOC100996866), misc_RNA"		ncbi	-													TGGAATCTTTAATAACTATCACCCAGTCAATTCTGTCCTCAAATCATCCTACACACGTTT
CUST_23425_PI429285431	6.45e-13	3.09755	lncRNA		CUST_23425_PI429285431	CUST_23425_PI429285431	FALSE	lncRNA	lnc-AC108463.1-3:8		lncipedia2.1	-				chr2	112252462	112253127	-	intergenic					CATCTTTTCCAACCTTAATGAACTGTATCCTCAAAAGAACACTATCAGACTGGCTCTGCC
LNCA_19_P00321917	3.09e-05	0.486208	lncRNA	TSIX	LNCA_19_P00803151	LNCA_19_P00803151	FALSE	lncRNA	XR_108951	XR_108951	Agilent_HUMAN_G3V2	-	LOC100506119			chr9	132104141	132104200	+	intergenic					TTCTTTCCCTGAGGACCATCTGGAGTGGACGCGTGCACTACCCCTCTCTGAATACACCCT
CUST_23974_PI429285431	2.07e-05	2.80309	lncRNA		CUST_239_PI429201921	CUST_239_PI429201921	FALSE	lncRNA	TC22000970.hg.1		Affy_HUMAN_HTA2.0	-				chr22	20186295	20192440	+	intergenic					TCCACGGAAGTGGTCCTTGTAACTCTCTCCCTGGTGGCAGCCTCTGGTGCATTCCGGCAG
CUST_31636_PI429285431	4.38e-07	0.480922	lncRNA		CUST_31636_PI429285431	CUST_31636_PI429285431	FALSE	lncRNA	n338157|BC040262|mRNAlikelncRNA|Homosapiens|HumanlncRNA|JounralRNA|546|NULL|-0.8858870|-0.2608437		NONCODERv3	-				chr22	44208372	44209924	+	bidirectional	EFCAB6	-	64800	EF-hand calcium binding domain 6	CAGAGGCCAGTCCCTCTAACTGTGTCCTGGATCCCTCCCCATTTGCCTTCTTTATTATAG
CUST_45566_PI429285431	6.2e-07	3.01567	lncRNA		CUST_45566_PI429285431	CUST_45566_PI429285431	FALSE	lncRNA	"gi|224177505|ref|NR_024497.2| Homo sapiens uncharacterized LOC399744 (LOC399744), non-coding RNA"		ncbi	-				Chr10	38720074	38722343	+	intergenic					AGATTTAATGACGGTCATGGCAACTTTTTGGCACAATGAAAAATATCGCCCATGAAAAAA
CUST_48513_PI429285431	8.27e-11	2.85123	lncRNA		CUST_48513_PI429285431	CUST_48513_PI429285431	FALSE	lncRNA	hg19_lincRNAsTranscripts_TCONS_l2_00014801 range=chr2:112124911-112252691 5'pad=0 3'pad=0 strand=- repeatMasking=none		UCSC	-				chr2	112124911	112125272	-	intergenic					TGCTGAGCTCAGAGGACAGAGCAGAAGACAAAGCCGAATGCAGCCCTAAGCAGACACTAT
CUST_34917_PI429285431	7.46e-08	2.60195	lncRNA		CUST_3491_PI429285431	CUST_3491_PI429285431	FALSE	lncRNA	"transcript_id ""ENST00000422343.1"" | genecode_v17"		gencode_v17	-				chr9	98412436	98412838	+	intergenic					CTGCTGAGTCCTCTGCGTCCCCTTCTTGCAGTCAGAGCCCCACAGTTGACGTGTGCTCTT
CUST_5071_PI429285431	9.84e-06	0.485006	lncRNA		CUST_5071_PI429285431	CUST_5071_PI429285431	FALSE	lncRNA	"transcript_id ""ENST00000428654.1"" | genecode_v17"		gencode_v17	-				chr14	106064028	106064243	-	intergenic					CGGCAGGGGAGGCCCCAGACCTCCCTCGACTACACCAACGTCCTCCAGCCCCACGCCTAG
CUST_50129_PI429285431	2.7e-09	3.35737	lncRNA		CUST_50129_PI429285431	CUST_50129_PI429285431	FALSE	lncRNA	hg19_lincRNAsTranscripts_TCONS_l2_00029067 range=chr9:132250770-132275755 5'pad=0 3'pad=0 strand=+ repeatMasking=none		UCSC	-				chr9	132250770	132252163	+	intergenic					CGATGCCGTTCCATTGTTTGCTGACTTTCATTGATTCTATGAGAAGTCTGCAGTCTTTTG
CUST_23245_PI429285431	4.72e-08	2.8845	lncRNA		CUST_23245_PI429285431	CUST_23245_PI429285431	FALSE	lncRNA	lnc-RP11-298P3.4.1-1:1		lncipedia2.1	-				chr13	33073344	33073856	-	intronic_sense	N4BP2L2	-	10443	NEDD4 binding protein 2-like 2	GGCTGTCTTAATAGTGCGCCTGTTACTAATGGAATTTACTTAAAAAGTAAGTTTGCCATA
CUST_18608_PI429285431	6.75e-08	0.368814	lncRNA		CUST_18620_PI429285431	CUST_18620_PI429285431	FALSE	lncRNA_mRNA	lnc-TUBGCP2-1:1		lncipedia2.1	"gi|256773271|ref|NM_001164490.1|,gi|256773267|ref|NM_001164489.1|,gi|256773263|ref|NM_001109.4|"				chr10	135090276	135093275	-	exonic_sense	ADAM8	-	101	ADAM metallopeptidase domain 8 (EC:3.4.24.-)	CAAGAGGGACAGCCCCAGCTTTGTGTGTGTTTAAGCTTAGGAATCGCCTTTATGGAAAGG
CUST_47463_PI429285431	6.22e-06	2.0929	lncRNA		CUST_47463_PI429285431	CUST_47463_PI429285431	FALSE	lncRNA	"gi|310124102|ref|XR_109748.1| PREDICTED: Homo sapiens uncharacterized LOC100286925 (LOC100286925), misc_RNA"		ncbi	-													TGCACATCCACACCTGCGTGTGAAAGAAGATGCTAGAAAAGAACAAAAATAACTTAAAAA
CUST_17541_PI429285431	1.85e-09	0.472634	lncRNA		CUST_17541_PI429285431	CUST_17541_PI429285431	FALSE	lncRNA	lnc-TBC1D22A-1:1		lncipedia2.1	-				chr22	47604255	47605140	+	intergenic					TCAGAGCAAAAGGCAACATGCTCTCCCGAGGTAAGATCCTAACTGTTGTCAGGAACATAT
CUST_47473_PI429285431	8.69e-06	0.495292	lncRNA		CUST_47473_PI429285431	CUST_47473_PI429285431	FALSE	lncRNA	"gi|258679451|ref|NR_028483.1| Homo sapiens ADORA2A antisense RNA 1 (ADORA2A-AS1), transcript variant 2, non-coding RNA"		ncbi	-				Chr22	24834245	24836013	-	intergenic					AGAAAAGCATATCCCTTCCTGGGTTCTGGCCCTGTTAACAGGAATGTTTTAAAACTTTAA
LNCA_21_P0012387	3.17e-09	0.334928	lncRNA	XLOC_l2_009811	LNCA_33_P3306048	LNCA_33_P3306048	FALSE	lncRNA	NR_002221	NR_002221	Agilent_HUMAN_G3V2	-	DPRXP4	divergent-paired related homeobox pseudogene 4		chr17	29302940	29302999	+	intronic_sense	RNF135	+	84282	ring finger protein 135	CTCTTCTGCCTGTTCATCTCTACAAAGTTGAGAGATGATAAATACAAAAAGTCACATGTA
CUST_18627_PI429285431	6.35e-08	0.395342	lncRNA		CUST_18640_PI429285431	CUST_18640_PI429285431	FALSE	lncRNA	lnc-GTF2F2-2:16		lncipedia2.1	-				chr13	45952665	45953181	+	intergenic					CTTCCTAAAATAGAGCTCTCAAAACCTGGCTGTTTTCCTTCAGAGCACTGGCCTCCAATT
CUST_24227_PI429285431	8.4e-09	3.77224	lncRNA		CUST_24235_PI429285431	CUST_24235_PI429285431	FALSE	lncRNA	lnc-GPR89C-2:1		lncipedia2.1	-				chr1	145833025	145833156	+	intronic_sense	NBPF10	+	100132406	"neuroblastoma breakpoint family, member 10"	ATTTGGCCCACAAGAAACACTTATTCAAGCCTACAATTTTCCCTGGGCAAGGGAAGGTCA
CUST_48207_PI429285431	3.44e-06	2.38159	lncRNA		CUST_48207_PI429285431	CUST_48207_PI429285431	FALSE	lncRNA	hg19_lincRNAsTranscripts_TCONS_l2_00000958 range=chr1:112760-168167 5'pad=0 3'pad=0 strand=- repeatMasking=none		UCSC	-				chr1	112760	113067	-	intergenic					CAGGTGAAGATTTACAACTTGATAAATCAACTTTGTCAGTAACAATTTGGACAAGACAGC
CUST_41607_PI429285431	9.32e-07	2.05772	lncRNA		CUST_41607_PI429285431	CUST_41607_PI429285431	FALSE	lncRNA	ENST00000390234 ncrna:miRNA chromosome:GRCh37:17:11985216:11985313:1 gene:ENSG00000211589 gene_biotype:miRNA transcript_biotype:miRNA		ensembl.GRCh37.72	-				chr17	11985216	11985313	+	intronic_sense	MAP2K4	+	6416	mitogen-activated protein kinase kinase 4 (EC:2.7.12.2)	CTGAAGGTTTCCTGGAAACCACGCACATGCTGTTGCCACTAACCTCAACCTTACTCGGTC
CUST_51265_PI429285431	0.00517588	2.04936	lncRNA		CUST_51265_PI429285431	CUST_51265_PI429285431	FALSE	lncRNA	hg19_lincRNAsTranscripts_TCONS_l2_00008489 range=chr15:28986271-28991383 5'pad=0 3'pad=0 strand=+ repeatMasking=none		UCSC	-				chr15	28986271	28986980	+	intergenic					CTCTGCAACTCATGAGAGCGAAAGAATTGTATTTAAATTGCAAAAGAGCTGAAATTCAGG
CUST_40817_PI429285431	2.84e-06	0.406184	lncRNA		CUST_40817_PI429285431	CUST_40817_PI429285431	FALSE	lncRNA	n410584|NR_037846_7|lncRNA|Homosapiens||RefGeneNoncode|NR_037846_7||-1.0119300|-0.2642549		NONCODERv3	-				chr6	3220333	3221393	+	intergenic					ACTTTGTAAATCTTCTGTCTCTAGGACATGGGTGTTGCTCCTTCACCTTGCTGCTTGTTC
LNCA_21_P0004420	5.6e-07	2.79976	lncRNA	XLOC_004924	LNCA_21_P0007354	LNCA_21_P0007354	FALSE	lncRNA			Agilent_HUMAN_G3V2	-	XLOC_009445			chr11	58902082	58902141	-	intergenic					TACTATAACCACTTGGAACCACTGTGTTTCTGGTCCATCTTGTGAGGCCCATCTTTGGTT
CUST_13802_PI429285431	7.09e-09	0.34762	lncRNA		CUST_13802_PI429285431	CUST_13802_PI429285431	FALSE	lncRNA	lnc-SAFB-1:1		lncipedia2.1	-				chr19	5581205	5582411	+	intergenic					ATTTGCATACTGTTTGTTAAATGTCAAAACACCCTGAAAATGCTTTCTCCCACCTCCACC
CUST_4097_PI429285431	4.03e-06	0.403806	lncRNA		CUST_40977_PI429285431	CUST_40977_PI429285431	FALSE	lncRNA	n411091|NR_038915|lncRNA|Homosapiens||RefGeneNoncode|NR_038915||0.0087055|-0.1352353		NONCODERv3	-				chr5	176864889	176866488	-	intronic_antisense	GRK6	+	2870	G protein-coupled receptor kinase 6 (EC:2.7.11.16)	CCACTCCCCACACCTCACATTCCTGCCCAGGGTCCCCCAGCGGTCCCATCTTGCTGAGAA
CUST_6982_PI429285431	1.68e-07	0.470736	lncRNA		CUST_6982_PI429285431	CUST_6982_PI429285431	FALSE	lncRNA	"transcript_id ""ENST00000423712.1"" | genecode_v17"		gencode_v17	-				chr22	35099117	35099884	-	intergenic					TGTTCTCAGATTTGGGCTGGAGCTCAGTATGACTGTTGGGGTCTCCTGCTACCCCTGGAG
CUST_50869_PI429285431	1.27e-06	3.12171	lncRNA		CUST_50893_PI429285431	CUST_50893_PI429285431	FALSE	lncRNA	hg19_lincRNAsTranscripts_TCONS_l2_00006027 range=chr12:132906471-132912612 5'pad=0 3'pad=0 strand=+ repeatMasking=none		UCSC	-				chr12	132906471	132909470	+	bidirectional	GALNT9	-	50614	UDP-N-acetyl-alpha-D-galactosamine:polypeptide N-acetylgalactosaminyltransferase 9 (GalNAc-T9) (EC:2.4.1.41)	ATTATTTTGCACAGATCTGAACAGCATTCACCCCCAGTTGGATATGGCCCTTTCCTCGAA
CUST_45767_PI429285431	1.24e-06	2.04317	lncRNA		CUST_45767_PI429285431	CUST_45767_PI429285431	FALSE	lncRNA	"gi|378548186|ref|NR_034093.2| Homo sapiens MRVI1 antisense RNA 1 (MRVI1-AS1), transcript variant 3, non-coding RNA"		ncbi	-				Chr11	10562783	10563453	+	intergenic					TCTCCTGCTAGCCACCCTCATCAGCCAGAGTTCAAACCCTGACAGTGCCCATGGAGAGAT
LNCA_21_P0003092	3.94e-06	0.478063	lncRNA	LOC440993	LNCA_21_P0005963	LNCA_21_P0005963	FALSE	lncRNA	XR_110876	XR_110876	Agilent_HUMAN_G3V2	-	LOC100507420	uncharacterized LOC100507420		chr8	37264395	37264454	-	intergenic					AGCGGGACTTAGACAATGGGGTTAGGCAGTCACATGTCTGCACGTGGAAACTTTCTGGGA
CUST_6624_PI429285431	3.35e-11	4.61946	lncRNA		CUST_6624_PI429285431	CUST_6624_PI429285431	FALSE	lncRNA	"transcript_id ""ENST00000447206.1"" | genecode_v17"		gencode_v17	-				chr20	1784662	1785007	-	intergenic					AATTCTCAAACTACAGGAAGTGGAGAGAACAGTACAGTGACCCTACACGCTTGTTACCAG
CUST_5034_PI429285431	1.05e-08	0.494565	lncRNA		CUST_5034_PI429285431	CUST_5034_PI429285431	FALSE	lncRNA	"transcript_id ""ENST00000556035.1"" | genecode_v17"		gencode_v17	-				chr14	101542642	101542906	-	intergenic					ATGCGTGAAATATGAATACATCCTCACGGTCCTCGTCTCGTTATAGGTTACAAAGTGCCG
CUST_12734_PI429285431	0.0026157	0.457782	lncRNA		CUST_12734_PI429285431	CUST_12734_PI429285431	FALSE	lncRNA	lnc-GINS2-2:2		lncipedia2.1	-				chr16	85615625	85616188	-	intergenic					CCCACTCCACCCCAGGAGCTCAGCAAACATCCACAGAGTGAACATTCCAAGCAACATAGT
CUST_37663_PI429285431	1.67e-06	0.449281	lncRNA		CUST_37663_PI429285431	CUST_37663_PI429285431	FALSE	lncRNA	n346146|NULL|lincRNA|Homosapiens|HumanlincRNA|ScriptureReconstructionLincRNAsByLuo[unpublished]|linc_luo_1696|NULL|-1.2612200|-0.2265578		NONCODERv3	-				chr10	38645330	38646958	+	intergenic					GTGTCTGCCACCGTGGCCCTTTCTTGCTGCCTCCTTTCTTTTTATTTCATATATTGAATG
CUST_25572_PI429285431	3.95e-06	0.432516	lncRNA		CUST_25572_PI429285431	CUST_25572_PI429285431	FALSE	lncRNA	lnc-AC002472.13.1-1:1		lncipedia2.1	-				chr22	21398196	21398758	+	intergenic					TCGGAAATGCAGTTTCTCTGGCCTGGTTTCTCAACCCATCCCTTTTTCTACCAGAAACCT
CUST_10556_PI429285431	2e-05	0.414366	lncRNA		CUST_10562_PI429285431	CUST_10562_PI429285431	FALSE	lncRNA	lnc-SALL3-2:1		lncipedia2.1	-				chr18	76400807	76401130	+	intergenic					AATAGACCACATCAGCTTCTCCCCAGGTGATAGTTCCCCCAAGCAGAATGCACATTGCCA
CUST_156_PI429285431	6.87e-08	0.497843	lncRNA		CUST_15603_PI429285431	CUST_15603_PI429285431	FALSE	lncRNA	lnc-C9orf38-2:1		lncipedia2.1	-				chr9	6411816	6412097	-	intergenic					ACAAAAACCTGCATGATACGAAGAGAATGAGATCAGGATATTCCCGTGGCTTTCTCCCTG
CUST_18543_PI429285431	6.78e-09	2.77125	lncRNA		CUST_18543_PI429285431	CUST_18543_PI429285431	FALSE	lncRNA	lnc-SPRYD7-1:8		lncipedia2.1	-				chr13	50655959	50656650	-	intergenic					AGCACTGTGCTGGGCACAGAATGGACTTCAGTTAAGTTTTTGATGTAGAAATGTTTTATT
CUST_41541_PI429285431	1.48e-06	0.411046	lncRNA		CUST_41541_PI429285431	CUST_41541_PI429285431	FALSE	lncRNA	ENST00000408483 ncrna:miRNA chromosome:GRCh37:19:10662798:10662880:1 gene:ENSG00000221410 gene_biotype:miRNA transcript_biotype:miRNA		ensembl.GRCh37.72	-				chr19	10662798	10662880	+	intronic_sense	ATG4D	+	84971	ATG4 autophagy related 4 homolog D (S. cerevisiae)	GTTGGGGCCATGGCGGGTGGGCAGCCCAGCCTCTGAGCCTTCCTCGTCTGTCTGCCCCAG
CUST_27492_PI429285431	0.000265153	2.09202	lncRNA		CUST_27492_PI429285431	CUST_27492_PI429285431	FALSE	lncRNA	n324669|NULL|mRNAlikelncRNA|Homosapiens|vegalncRNA|GENCODE|OTTHUMT00000321237|http://vega.sanger.ac.uk/Homo_sapiens/Transcript/Summary?db=core;t=OTTHUMT00000321237|-1.0634200|-0.2105629		NONCODERv3	-				chr22	37678691	37679256	+	intronic_sense	CYTH4	+	27128	cytohesin 4	TCCTAGATAAAGGAATACAGCGCAGGTGGGAAATGCAGCTGCAAGAAGCAAACATTTGTG
CUST_30743_PI429285431	1.7e-07	0.447046	lncRNA		CUST_30771_PI429285431	CUST_30771_PI429285431	FALSE	lncRNA	n336611|Z36809|mRNAlikelncRNA|Homosapiens|NULL|H-invitationalv7.5|HIT000327117|http://h-invitational.jp/hinv/spsoup/transcript_view?hit_id=HIT000327117|1.3061100|-0.1865967		NONCODERv3	-				chr15	72494792	72495106	-	exonic_sense	PKM	-			ACGTTCCCCCCATCATTGCTGTGCACCCTTTAATCCCCAAGACAGCTCGATTAGGTTCTA
LNCA_21_P0014028	9.17e-08	2.60285	lncRNA	PP12719
CUST_46347_PI429285431	4.99e-06	2.50576	lncRNA		CUST_46347_PI429285431	CUST_46347_PI429285431	FALSE	lncRNA	"gi|224451046|ref|NR_027046.1| Homo sapiens uncharacterized LOC145474 (LOC145474), non-coding RNA"		ncbi	-				Chr14	71954578	71956436	+	intergenic					ATATATTCTTCAGTGTGATTTAGGTGAGTCAGGAATTTTTCCTCTGGAGACTGCCTAAAT
CUST_760_PI429285431	0.0121246	0.376646	lncRNA		CUST_7608_PI429285431	CUST_7608_PI429285431	FALSE	lncRNA	lnc-C19orf26-2:1		lncipedia2.1	-				chr19	1259059	1260543	-	exonic_antisense	MIDN	+	90007	midnolin	TGTAAAGTGCATAATGACATATCGACATTTTTGACTTAAAACCTGAATAGGGTCGGGGGG
CUST_15603_PI429285431	5.4e-09	0.436256	lncRNA		CUST_15612_PI429285431	CUST_15612_PI429285431	FALSE	lncRNA	lnc-C21orf67-5:1		lncipedia2.1	-				chr21	46488820	46489384	-	intergenic					AGTGGAGGCTAAACAAAATCATCTTCCCTCCCACCGTGGCTCTTGTTCAATAAAACCAAC
CUST_9538_PI429285431	9.17e-09	3.8493	lncRNA		CUST_9538_PI429285431	CUST_9538_PI429285431	FALSE	lncRNA	lnc-EGLN1-1:6		lncipedia2.1	-				chr1	231663868	231664297	-	bidirectional	TSNAX	+	7257	translin-associated factor X	GTAACTTGGCTAGAATATGGCAGTAACTACAAGGCATGTTCTGCTCTGGCACGAAGACAA
CUST_15612_PI429285431	8.54e-08	0.489895	lncRNA		CUST_15615_PI429285431	CUST_15615_PI429285431	FALSE	lncRNA	lnc-CHMP7-1:2		lncipedia2.1	-				chr8	23087461	23089430	+	intergenic					TGAGTCAGCTGTCGTTCATATCTTTGTTACCTGTGAATGCACAAAATTTGCTCTGTATGA
CUST_31241_PI429285431	9.09e-08	0.368133	lncRNA		CUST_31241_PI429285431	CUST_31241_PI429285431	FALSE	lncRNA	n337690|AF147307|mRNAlikelncRNA|Homosapiens|HumanlncRNA|JounralRNA|72|NULL|-0.9506400|-0.1014387		NONCODERv3	-				chrX	49021913	49022310	-	intronic_antisense	MAGIX	+	79917	"MAGI family member, X-linked"	TCTGCCTTCGCCTCTGAGAACTAAGACCCTTCCTTCCAAACACTTGCTTTTATCCTAGAC
CUST_24525_PI429285431	7.83e-09	0.441909	lncRNA		CUST_24528_PI429285431	CUST_24528_PI429285431	FALSE	lncRNA	lnc-KCTD6-4:2		lncipedia2.1	-				chr3	58956084	58956648	+	intronic_antisense	C3orf67	-	200844	chromosome 3 open reading frame 67	AAGGTTATAGGAACAGGAGTCAACCTCTTGGAGTTTCAATTTCCTCCCCTATAAATTGGG
LNCA_19_P00812329	3.98e-05	0.490048	lncRNA	XLOC_007868	LNCA_21_P0001334	LNCA_21_P0001334	FALSE	lncRNA			Agilent_HUMAN_G3V2	-	XLOC_000282			chr1	89501241	89501300	+	intergenic					CCCTGTGTCAAATTGCTATATTCTAAATTGACAGCTCTTTCGCTCCCTTATCGCTGCTTC
CUST_23055_PI429285431	6.78e-08	2.31559	lncRNA		CUST_23055_PI429285431	CUST_23055_PI429285431	FALSE	lncRNA	lnc-TBK1-1:1		lncipedia2.1	-				chr12	65023674	65023954	+	intronic_sense	RASSF3	+	283349	Ras association (RalGDS/AF-6) domain family member 3	CTGCAGCTTTTTGGGATTGAAGGAGTATGTTCATTTCCTTTGGAAGATTAATTTTTTCCT
LNCA_21_P0012866	2.5e-07	0.49181	lncRNA	XLOC_l2_011872	LNCA_33_P3338360	LNCA_33_P3338360	FALSE	lncRNA	NR_003002	NR_003002	Agilent_HUMAN_G3V2	-	SCARNA13	small Cajal body-specific RNA 13		chr14	95999692	95999751	-	intergenic					GTCGAGATATTGTTTAGCAGATGGAGTGTTTTCTGTTGAACACTAAGTACTGCCACAAGT
CUST_13706_PI429285431	0.01125	0.484142	lncRNA		CUST_13706_PI429285431	CUST_13706_PI429285431	FALSE	lncRNA	lnc-GARS-4:1		lncipedia2.1	-				chr7	30443218	30445887	+	intergenic					CCTTCTTCCCCTTGATCCTTATTTTTTATGTGATCAACATAATACATGAGATCAACCAGT
CUST_23262_PI429285431	6.41e-08	0.411812	lncRNA		CUST_23262_PI429285431	CUST_23262_PI429285431	FALSE	lncRNA	lnc-MSX2-4:4		lncipedia2.1	-				chr5	173953231	173953791	+	intergenic					AAATGAAAGAATACTCAGATATCTGGGGTACAGTTCCCCTCCAGGTTTGCACAGCATCTG
CUST_26254_PI429285431	2.6e-07	0.485435	lncRNA		CUST_26254_PI429285431	CUST_26254_PI429285431	FALSE	lncRNA	lnc-RHOBTB2-2:1		lncipedia2.1	-				chr8	22741471	22742042	+	intronic_antisense	PEBP4	-	157310	phosphatidylethanolamine-binding protein 4	TTGGCAATTTTGGAGGCCAGTGAAGAGCCACGTAGAAAATGTCCCGCTGCCTGCCATCAT
CUST_18899_PI429285431	8.1e-07	0.371583	lncRNA		CUST_18899_PI429285431	CUST_18899_PI429285431	FALSE	lncRNA	lnc-SLC7A13-1:2		lncipedia2.1	-				chr8	87355311	87355876	-	intronic_antisense	WWP1	+	11059	WW domain containing E3 ubiquitin protein ligase 1	GTGACCCCACCCCAGAAAACTCCCGACTCCCGGGCTGGAGAAGGTAGCCAAGATCATTCT
LNCA_19_P00322109	3.43e-09	2.29247	lncRNA	LOC401320	LNCA_19_P00804049	LNCA_19_P00804049	FALSE	lncRNA	NR_038889	NR_038889	Agilent_HUMAN_G3V2	-	LOC401320	uncharacterized LOC401320		chr7	30588716	30588775	-	intergenic					TGGCTTTCAGGGGCCTGTCTGATACCTATGGAGAGACGAGGGCTGAACAAGCTGTACTCT
CUST_8987_PI429285431	2.65e-10	2.02646	lncRNA		CUST_8987_PI429285431	CUST_8987_PI429285431	FALSE	lncRNA	lnc-MYO6-1:1		lncipedia2.1	-				chr6	76362140	76364500	+	intronic_sense	SENP6	+	26054	SUMO1/sentrin specific peptidase 6	GGGGACAAATGATATACAGATTTTTAAGACTTGATACGTTAATGCCAAAATGCCTTGTGT
CUST_15208_PI429285431	7.44e-09	0.345656	lncRNA		CUST_15208_PI429285431	CUST_15208_PI429285431	FALSE	lncRNA	lnc-RFPL4B-4:1		lncipedia2.1	-				chr6	113204243	113204761	+	intergenic					AACAGCAAGAGTCTATTTGTCAAGATTTCTCCCTAAAGCCCTTTGGCTACTCAGGAAGGC
LNCA_21_P0005535	7.05e-08	0.245346	lncRNA	XLOC_006625	LNCA_21_P0009093	LNCA_21_P0009093	FALSE	lncRNA			Agilent_HUMAN_G3V2	-	XLOC_011645			chr16	11318439	11318498	+	intergenic					CCACCTCCCTGCTCTGTTGCTGGCTCTCCTTGAAGACAAGTGTTTTTCAATTAACCAAAG
LNCA_21_P0007354	2.19e-07	0.450843	lncRNA	XLOC_009445	LNCA_21_P0010898	LNCA_21_P0010898	FALSE	lncRNA			Agilent_HUMAN_G3V2	-	XLOC_l2_002069			chr10	96857903	96857962	-	intergenic					GCATAGGGAAGAAGGTTGAAGGAGTGTCATTTATGAACAGAGCATTCTCCCTTTGGCTTT
CUST_41063_PI429285431	7.35e-10	0.339236	lncRNA		CUST_41063_PI429285431	CUST_41063_PI429285431	FALSE	lncRNA	ENST00000584548 ncrna:miRNA chromosome:GRCh37:10:50193557:50193632:-1 gene:ENSG00000264800 gene_biotype:miRNA transcript_biotype:miRNA		ensembl.GRCh37.72	-				chr10	50193557	50193632	-	intergenic					TCTACAGCAGGGCCATGTCTGTGAGGGCCCAAGGGTGCATGTGTCTCCCAGGTTTCGGTG
LNCA_21_P0006547	1.05e-08	0.391404	lncRNA	XLOC_008216	LNCA_21_P0010238	LNCA_21_P0010238	FALSE	lncRNA			Agilent_HUMAN_G3V2	-	FAM165B	"family with sequence similarity 165, member B"	GO:0003674(molecular_function)|GO:0005575(cellular_component)|GO:0008150(biological_process)|GO:0016020(membrane)|GO:0016021(integral to membrane)	chr21	35779990	35780049	+	intergenic					TAAGGCAAACCCCCATCTCTGGCTTCTCCTGGAACCTCACCTGGGAAAGAAAGAGGCAGC
CUST_17730_PI429285431	1.17e-09	0.472618	lncRNA		CUST_17730_PI429285431	CUST_17730_PI429285431	FALSE	lncRNA	lnc-FAM70B-2:2		lncipedia2.1	-				chr13	114568810	114570601	+	intergenic					GATAAACTTCAAAGAGTGAATGAGCATCTCTAGCCTCTGCCTGTTCATCTGGGACAATCT
CUST_40586_PI429285431	2.07e-07	0.391973	lncRNA		CUST_40586_PI429285431	CUST_40586_PI429285431	FALSE	lncRNA	n410043|NR_036481|lncRNA|Homosapiens||RefGeneNoncode|NR_036481||7.0945900|-0.1405492		NONCODERv3	-				chr3	13977552	13977928	+	intergenic					ACAAGAAGAAGAAGTCATCCTTTAAGCGGTTCCTGGCGCTGATGTTTAACAAGATGGAGA
CUST_19167_PI429285431	2.4e-07	0.459093	lncRNA		CUST_19167_PI429285431	CUST_19167_PI429285431	FALSE	lncRNA	lnc-SMUG1-6:3		lncipedia2.1	-				chr12	54378494	54379026	-	exonic_antisense	HOXC10	+	3226	homeobox C10	ATGTTTCAAACAGTTATTTCCGTTTCTCCATCGCCTTCTTCCAAAGCGAACTAAACTCTC
CUST_16421_PI429285431	2e-05	0.439742	lncRNA		CUST_16421_PI429285431	CUST_16421_PI429285431	FALSE	lncRNA	lnc-BRD3-1:2		lncipedia2.1	-				chr9	137000308	137000710	-	bidirectional	WDR5	+	11091	WD repeat domain 5	ATGTTCAGAGAAACAGTTCCATTTACTAAGTCACTGCTGGTGGCCAAAGCCTAGTTAATG
CUST_38805_PI429285431	1.21e-08	0.330572	lncRNA		CUST_38812_PI429285431	CUST_38812_PI429285431	FALSE	lncRNA	n384577|NULL|lncRNA|Homosapiens||UCSCGeneNoncode|uc003jci.1||-1.1185200|-0.1907158		NONCODERv3	-				chr5	1363696	1365189	-	intergenic					CCACCCCAAAAAACTTTATCTTCTATTCCGTTGGTCTGCCTATCTAGAAAGCAAAATTTC
LNCA_21_P0005234	3.56e-07	0.341814	lncRNA	XLOC_006102	LNCA_21_P0008501	LNCA_21_P0008501	FALSE	lncRNA			Agilent_HUMAN_G3V2	-	XLOC_011152			chr14	105533881	105533940	-	intergenic					ATCGGGATGTGAAGTTGTACCCCATGTCTGCAGCTTGGACCTCACCACTGCTGTGTCTGG
CUST_45769_PI429285431	0.000234285	0.427076	lncRNA		CUST_45769_PI429285431	CUST_45769_PI429285431	FALSE	lncRNA	"gi|336594381|ref|NR_038904.1| Homo sapiens uncharacterized LOC100506305 (LOC100506305), non-coding RNA"		ncbi	-				Chr11	13001081	13002656	-	intergenic					GCTGCCTCTCACTTCTCCCTGTTTTGTTGTTCTTTTAAGTAGCATGTGTCACTCTGTAAA
CUST_27449_PI429285431	7.18e-08	0.392522	lncRNA		CUST_27449_PI429285431	CUST_27449_PI429285431	FALSE	lncRNA	n324625|NULL|mRNAlikelncRNA|Homosapiens|vegalncRNA|GENCODE|OTTHUMT00000132641|http://vega.sanger.ac.uk/Homo_sapiens/Transcript/Summary?db=core;t=OTTHUMT00000132641|-1.2843000|-0.2955499		NONCODERv3	-				chr5	131542825	131543205	-	intronic_sense	P4HA2	-	8974	"prolyl 4-hydroxylase, alpha polypeptide II (EC:1.14.11.2)"	GGCATGACAGGTCTCTCCATATCTTTTTAAGTTTTCTTCATATAAGCCTTGAACATTTCT
CUST_2689_PI429285431	5.42e-08	2.51917	lncRNA		CUST_26890_PI429285431	CUST_26890_PI429285431	FALSE	lncRNA	n323965|NULL|mRNAlikelncRNA|Homosapiens|vegalncRNA|GENCODE|OTTHUMT00000054571|http://vega.sanger.ac.uk/Homo_sapiens/Transcript/Summary?db=core;t=OTTHUMT00000054571|0.1083040|-0.2661959		NONCODERv3	-				chr9	131060453	131061418	+	intergenic					ATGTTAGTCCCTTCTGTTACCCAGCCTATCTCTGGTATAAGTTTCCAGGCTCCTGCTAAA
CUST_6645_PI429285431	1.69e-05	0.34263	lncRNA		CUST_6645_PI429285431	CUST_6645_PI429285431	FALSE	lncRNA	"transcript_id ""ENST00000558175.1"" | genecode_v17"		gencode_v17	-				chr20	11781111	11781806	-	intergenic					AAGCTGATTGCTTCTTACTGCAAGCACTTGAGCATCTTCCTGAGAGCTTTCTTGGGCAAT
CUST_18311_PI429285431	2.39e-05	2.01695	lncRNA		CUST_18311_PI429285431	CUST_18311_PI429285431	FALSE	lncRNA	lnc-DDX27-1:3		lncipedia2.1	-				chr20	47905582	47906656	+	intergenic					CCAGGATGAATGCGGGTGTTGGAAGTAGAATATATATATACATATAAAATTGGTTGGGAG
CUST_40256_PI429285431	3.77e-06	2.75954	lncRNA		CUST_40256_PI429285431	CUST_40256_PI429285431	FALSE	lncRNA	n408181|NR_028324|lncRNA|Homosapiens||RefGeneNoncode|NR_028324||2.6573900|-0.1155718		NONCODERv3	-				chr19	200015	201888	-	intergenic					CGGCAGCCTCTTGGCCTCTAATTTGTTTATCTTTTGTGTATAAATCCCAAAATATTGAAT
CUST_9995_PI429285431	1.67e-05	0.427063	lncRNA		CUST_9995_PI429285431	CUST_9995_PI429285431	FALSE	lncRNA	lnc-LAT2-1:1		lncipedia2.1	-				chr7	73669345	73669923	+	bidirectional	RFC2	-	5982	"replication factor C (activator 1) 2, 40kDa"	TTTTCCAGATTGCTCTGAATGTCCTAGTGAGCTGCTCCCGTTGGGTAGGCTCCTGCGCCT
CUST_23912_PI429285431	0.000189957	0.360895	lncRNA		CUST_2394_PI429285431	CUST_2394_PI429285431	FALSE	lncRNA	"transcript_id ""ENST00000524295.1"" | genecode_v17"		gencode_v17	-				chr5	151332132	151332722	+	intergenic					CAGCCATAATACTTGCTCTCCCCAATGTTGTTTTAGCAGATTTGACACATACAGAAGCGT
CUST_24595_PI429285431	5.04e-06	2.84325	lncRNA		CUST_24599_PI429285431	CUST_24599_PI429285431	FALSE	lncRNA	lnc-HERC3-1:2		lncipedia2.1	-				chr4	89648986	89651438	+	exonic_antisense	FAM13A	-	10144	"family with sequence similarity 13, member A"	TACTTTTGTCTTACAGGATTCAGAATCCATGGCTGGAAGAGGTAGTAAGGCCATTGGGAG
CUST_18536_PI429285431	1.37e-07	0.466083	lncRNA		CUST_18536_PI429285431	CUST_18536_PI429285431	FALSE	lncRNA	lnc-ZFP14-1:4		lncipedia2.1	-				chr19	36813032	36813493	-	intergenic					CATTGTACCTGGCCCGCATCACTCAGTAACTGTCACCTTTGATTTATTGATTTACTTGAG
CUST_14818_PI429285431	5.48e-05	0.36232	lncRNA		CUST_14818_PI429285431	CUST_14818_PI429285431	FALSE	lncRNA	lnc-DMRTA1-5:2		lncipedia2.1	-				chr9	23946499	23947177	+	intergenic					TCTCCCGTCTCTCTCGCAAGCACACACGATGACTTGAGATGATGCATATATTCAAGGAAT
CUST_51293_PI429285431	0.000355668	2.03436	lncRNA		CUST_51293_PI429285431	CUST_51293_PI429285431	FALSE	lncRNA	hg19_lincRNAsTranscripts_TCONS_l2_00008986 range=chr15:32808411-32825872 5'pad=0 3'pad=0 strand=- repeatMasking=none		UCSC	-				chr15	32808411	32811410	-	intergenic					TACACATTTCTTTATGGGTTTCACTTAGACTGCATGAAATTGCAGATGCCAATTACCTTT
CUST_8523_PI429285431	0.018144	0.321688	lncRNA		CUST_8523_PI429285431	CUST_8523_PI429285431	FALSE	lncRNA	lnc-RASA1-7:4		lncipedia2.1	-				chr5	88238833	88239395	+	intergenic					CTCCCTCTCAAACCGCACCATTGGCACAGACTAATATTTATACAACTTTTTATTTTAAAC
CUST_19768_PI429285431	5.42e-05	2.23442	lncRNA		CUST_19768_PI429285431	CUST_19768_PI429285431	FALSE	lncRNA	lnc-AC040934.1-3:1		lncipedia2.1	-				chr17	45726762	45727203	-	bidirectional	KPNB1	+	3837	karyopherin (importin) beta 1	AAGAAGACTCCAAATTCTTGGCATATGAATCAGCTGTTCGGTAGCTCCACCTTATCCCTG
CUST_28082_PI429285431	4.65e-09	0.437937	lncRNA		CUST_28082_PI429285431	CUST_28082_PI429285431	FALSE	lncRNA	n325352|NULL|mRNAlikelncRNA|Homosapiens|vegalncRNA|GENCODE|OTTHUMT00000325403|http://vega.sanger.ac.uk/Homo_sapiens/Transcript/Summary?db=core;t=OTTHUMT00000325403|-0.9908790|-0.4096690		NONCODERv3	-				chr2	32919584	32920275	+	intronic_sense	TTC27	+	55622	tetratricopeptide repeat domain 27	AAATAACTATGCTCATAATGCTTCCAGGTTCAGTGCTATCAGCAAGTCTCTCCCACCCTG
CUST_23065_PI429285431	5.84e-07	2.63915	lncRNA		CUST_23065_PI429285431	CUST_23065_PI429285431	FALSE	lncRNA	lnc-CEP170-1:4		lncipedia2.1	-				chr1	243260492	243261021	-	intergenic					TTTCAAGATGATGATTATTCCCCACCTTCTAAGAGACAAAGACCAACGAGCCACCACAGC
CUST_40824_PI429285431	9.2e-07	3.92134	lncRNA		CUST_40824_PI429285431	CUST_40824_PI429285431	FALSE	lncRNA	n410593|NR_037852_5|lncRNA|Homosapiens||RefGeneNoncode|NR_037852_5||-1.0736400|-0.1912514		NONCODERv3	-				chr6	2840911	2842849	-	exonic_sense	SERPINB1	-	1992	"serpin peptidase inhibitor, clade B (ovalbumin), member 1"	AACTAGAGACGATTTCACAACAAGGAGAAATCAGCTTTGTGCTTACATGCCGAGCAGCCA
LNCA_21_P0005605	0.00105242	0.459759	lncRNA	XLOC_006476	LNCA_21_P0009196	LNCA_21_P0009196	FALSE	lncRNA			Agilent_HUMAN_G3V2	-	XLOC_012515			chr17	48358966	48359025	-	intergenic					TGGAAGTGTGGTGAGTGATTGACTTACATCCTTCTAGATCTTATCTACATATTTGCAAAG
CUST_12762_PI429285431	1.18e-05	0.435282	lncRNA		CUST_12762_PI429285431	CUST_12762_PI429285431	FALSE	lncRNA	lnc-FGFR1OP-1:2		lncipedia2.1	-				chr6	167317788	167318414	+	intergenic					TTGCGGTTTCTTCCTTGCTCCTTGCAGGTTATATTTGAAATGAATGTCAGAGCCATGCGG
CUST_7096_PI429285431	4.68e-08	2.20015	lncRNA		CUST_7096_PI429285431	CUST_7096_PI429285431	FALSE	lncRNA	"transcript_id ""ENST00000603672.1"" | genecode_v17"		gencode_v17	-				chrX	73183790	73184866	-	intergenic					AAGTATTAATTCTTCCACTGATATCTCAAAAGGTGATCTGGACAAAGGAACAGGTATCTC
CUST_49949_PI429285431	9.31e-07	2.54532	lncRNA		CUST_49950_PI429285431	CUST_49950_PI429285431	FALSE	lncRNA	hg19_lincRNAsTranscripts_TCONS_l2_00026202 range=chr7:128220066-128259236 5'pad=0 3'pad=0 strand=+ repeatMasking=none		UCSC	-				chr7	128220066	128220767	+	intergenic					AGAAAAGATGATGATTATTCCCCACCTTCTAAGAGACAAAGACCAACGAGCCACCACAGC
LNCA_21_P0009942	9.57e-06	0.471974	lncRNA	XLOC_013474	LNCA_21_P0014015	LNCA_21_P0014015	FALSE	lncRNA	XM_003403472	XM_003403472	Agilent_HUMAN_G3V2	-	LOC100652963	putative uncharacterized protein encoded by NCRNA00269-like		chr17	40122887	40122946	+	intronic_sense	CNP	+	1267	"2',3'-cyclic nucleotide 3' phosphodiesterase (EC:3.1.4.37)"	GTCTGGAAATCAAAATCACAGATACTCCACTCCTCTTTGTGTCTTCCAGCCCCATAATGT
CUST_36525_PI429285431	5.52e-08	0.458092	lncRNA		CUST_36525_PI429285431	CUST_36525_PI429285431	FALSE	lncRNA	n345025|NULL|lincRNA|Homosapiens|HumanlincRNA|ScriptureReconstructionLincRNAsByLuo[unpublished]|linc_luo_574|NULL|-1.3165200|-0.3080929		NONCODERv3	-				chr8	125472839	125475102	-	intergenic					AAAGGTTCCTCTCTTGGGAATCAGGACTTCTAATTCACAAAGTTGCGGGGATGAGAAGTC
CUST_51645_PI429285431	4.19e-07	0.420683	lncRNA		CUST_51645_PI429285431	CUST_51645_PI429285431	FALSE	lncRNA	hg19_lincRNAsTranscripts_TCONS_l2_00011379 range=chr17:58203930-58213083 5'pad=0 3'pad=0 strand=- repeatMasking=none		UCSC	-				chr17	58203930	58205196	-	intergenic					AGAAACGATTGCAGCTCTTCCCGGAAAAGTTAAAGCCTTTGAGAAACAAAGCTGAGCAGG
CUST_33863_PI429285431	8.52e-08	3.89867	lncRNA		CUST_33880_PI429285431	CUST_33880_PI429285431	FALSE	lncRNA_mRNA	n340670|AK123519|mRNAlikelncRNA|Homosapiens|HumanlncRNA|JounralRNA|3133|NULL|-0.4158630|-0.3309032		NONCODERv3	ENST00000378004				chr5	142605732	142608556	+	exonic_sense	ARHGAP26	+	23092	Rho GTPase activating protein 26	CATGTGGTTGGTTTATGTGACAATCCCTATGAAATGAGTGGACGTATGATTTTTGAATTA
CUST_2450_PI429285431	1.19e-05	0.467172	lncRNA		CUST_24507_PI429285431	CUST_24507_PI429285431	FALSE	lncRNA	lnc-MAP1LC3B2-1:2		lncipedia2.1	-				chr12	116992100	116992831	+	intergenic					TATTTCCAATTATGGAGAAAAGCGATTCCTCCCTGGTCTGGCTATCATGTGTTTTGCAGT
CUST_8256_PI429285431	2.12e-05	0.484081	lncRNA		CUST_8256_PI429285431	CUST_8256_PI429285431	FALSE	lncRNA	lnc-GNA14-1:1		lncipedia2.1	-				chr9	79810393	79812143	-	intronic_antisense	VPS13A	+	23230	vacuolar protein sorting 13 homolog A (S. cerevisiae)	AGGACACCGTCACCCACAGCCTCCCCCGACGGCTTTTCCAATGTATATGCAGGCCTTACC
CUST_36233_PI429285431	9.76e-05	0.148422	lncRNA		CUST_36233_PI429285431	CUST_36233_PI429285431	FALSE	lncRNA	n344773|NULL|lincRNA|Homosapiens|HumanlincRNA|ScriptureReconstructionLincRNAsByLuo[unpublished]|linc_luo_322|NULL|-1.3378300|-0.2135553		NONCODERv3	-				chr12	111374389	111375260	+	intergenic					AGAAAACTGTTCTCCCTTAACAAGAACCTCCCCAGTTTCAGCTTTCTTTGTGGGGTAGTG
CUST_4158_PI429285431	0.000178528	5.92035	lncRNA		CUST_4158_PI429285431	CUST_4158_PI429285431	FALSE	lncRNA	"transcript_id ""ENST00000542819.1"" | genecode_v17"		gencode_v17	-				chr12	8700957	8701518	-	intergenic					TAGTGAGAAGTGAGAAACTCTTCCAGCATAGTAACTGTATTCAACAGGTATGTCTATGCT
LNCA_21_P0006309	2.35e-08	0.374394	lncRNA	XLOC_007824	LNCA_21_P0010023	LNCA_21_P0010023	FALSE	lncRNA			Agilent_HUMAN_G3V2	-	XLOC_013694			chr20	23499278	23499337	-	intergenic					AGTGAACAATGTAGCCCAGAAGAGCCAGCACAGATCCCTCCCACCTATCAGCCCTGTCTT
CUST_36940_PI429285431	0.000121519	0.356142	lncRNA		CUST_36940_PI429285431	CUST_36940_PI429285431	FALSE	lncRNA	n345410|NULL|lincRNA|Homosapiens|HumanlincRNA|ScriptureReconstructionLincRNAsByLuo[unpublished]|linc_luo_959|NULL|-1.3749700|-0.2259300		NONCODERv3	-				chr22	28134997	28135510	+	intergenic					TAAAAATAAACTGGGATGAGCTTCCTTCCTTGAACCTCCTCCAGCTCACTAAGGACAGAG
CUST_33038_PI429285431	5.34e-08	0.475257	lncRNA		CUST_33048_PI429285431	CUST_33048_PI429285431	FALSE	lncRNA_mRNA	n339738|BC020771|mRNAlikelncRNA|Homosapiens|HumanlncRNA|JounralRNA|2184|NULL|6.1855600|-0.3105800		NONCODERv3	"ENST00000360816,ENST00000358293"				chr20	58515524	58516919	+	exonic_sense	FAM217B	+			AGCAGATTCCTGTAAGGCCTCCAAAACACAAGCACATGCACATCCTAGGAAAAAGGGAAA
CUST_2686_PI429285431	1.15e-06	4.99881	lncRNA		CUST_2686_PI429285431	CUST_2686_PI429285431	FALSE	lncRNA	"transcript_id ""ENST00000430078.1"" | genecode_v17"		gencode_v17	-				chr6	160007987	160009988	-	intergenic					AATAGAACCAACGGAGGAGAGGTGACCATGATACTAACAATAAAAGAAAACTTCCCTGAA
CUST_11430_PI429285431	5.08e-10	0.46765	lncRNA		CUST_11438_PI429285431	CUST_11438_PI429285431	FALSE	lncRNA	lnc-LRRC6-2:1		lncipedia2.1	-				chr8	133699708	133699912	-	intergenic					GCAGAGTCACCTGGCATCATCAAGGCCTTTAGCACCTGCTACCACTTGTCTGCTACGAAG
CUST_35014_PI429285431	1.5e-07	3.32285	lncRNA		CUST_35017_PI429285431	CUST_35017_PI429285431	FALSE	lncRNA_mRNA	n341954|AK023663|mRNAlikelncRNA|Homosapiens|HumanlncRNA|JounralRNA|4435|NULL|-0.9852050|-0.3056178		NONCODERv3	ENST00000261233				chr12	66645118	66647710	+	exonic_sense	IRAK3	+	11213	interleukin-1 receptor-associated kinase 3 (EC:2.7.11.1)	ACAAACATTAATTGGAATGGGGGGTAAGGAGGTAGGAATGGCTTACTTGCGGAAATGCAG
CUST_36130_PI429285431	4.53e-08	0.499553	lncRNA		CUST_36130_PI429285431	CUST_36130_PI429285431	FALSE	lncRNA	n344703|NULL|lincRNA|Homosapiens|HumanlincRNA|ScriptureReconstructionLincRNAsByLuo[unpublished]|linc_luo_252|NULL|-1.2792600|-0.3596951		NONCODERv3	-				chr2	186903622	186905866	-	intergenic					CTAAAAAAGAATTTTCCCCTCGATGTGGAGCTGCAGCTGATAAAATATTAAAAGATTTGC
CUST_46797_PI429285431	8.88e-08	2.42682	lncRNA		CUST_46797_PI429285431	CUST_46797_PI429285431	FALSE	lncRNA	"gi|60593078|ref|NR_002221.1| Homo sapiens divergent-paired related homeobox pseudogene 4 (DPRXP4), non-coding RNA"		ncbi	-				Chr17	29302353	29303022	+	intergenic					TGACTCTTCTGCCTGTTCATCTCTACAAAGTTGAGAGATGATAAATACAAAAAGTCACAT
LNCA_21_P0006976	7.57e-07	0.34006	lncRNA	XLOC_008752	LNCA_21_P0010592	LNCA_21_P0010592	FALSE	lncRNA	NR_033908	NR_033908	Agilent_HUMAN_G3V2	-	LOC100288069	general transcription factor IIi pseudogene		chr1	713824	713883	-	intergenic					GAAAAATTCAGACCCAGCACAGTGTTTATGTTGGTCAAAAATAGAAAACTATGTCTGGCG
CUST_18468_PI429285431	4.93e-12	2.88113	lncRNA		CUST_18468_PI429285431	CUST_18468_PI429285431	FALSE	lncRNA	lnc-NR1I2-1:1		lncipedia2.1	-				chr3	119855175	119856143	+	intergenic					GGAGGACACTTCAATCTAAAGTGATCTTAAAGGAGGAGTAGTAGGATTTGAAGATGAAGA
CUST_13955_PI429285431	4.99e-07	0.445568	lncRNA		CUST_13955_PI429285431	CUST_13955_PI429285431	FALSE	lncRNA	lnc-TMEM18-11:1		lncipedia2.1	-				chr2	916699	917287	-	intergenic					AATACTATGCTGCTGGTGTTACATTTCTAAAGCACAGGCCTCCCTCTTATGTTCCTCTGC
CUST_114_PI429285431	3.74e-07	3.24855	lncRNA		CUST_1141_PI429285431	CUST_1141_PI429285431	FALSE	lncRNA	"transcript_id ""ENST00000413043.1"" | genecode_v17"		gencode_v17	-				chr2	154028501	154028883	-	intergenic					TGGTTCACTTCTCATCTCTGCCTCTTTCTTCCCAAATGTCCTGCACTAGAATGGTATGCT
CUST_3553_PI429285431	3.72e-09	3.10583	lncRNA		CUST_3554_PI429285431	CUST_3554_PI429285431	FALSE	lncRNA	"transcript_id ""ENST00000444184.1"" | genecode_v17"		gencode_v17	-				chr9	132250824	132252710	+	intergenic					AATGTAGTGTCTTTAGACCGTGCAATGTTGTGCTCCTGTTAGTCTGATATCAGGGGCTTG
CUST_8662_PI429285431	0.000130717	0.416752	lncRNA		CUST_8662_PI429285431	CUST_8662_PI429285431	FALSE	lncRNA	lnc-WBP4-1:1		lncipedia2.1	-				chr13	41768550	41770900	+	exonic_antisense	KBTBD7	-	84078	kelch repeat and BTB (POZ) domain containing 7	GAAATCCTCTTGGGCCGCCTCCCTTTATTGCATAGACAGTGGCTGACTCACCCTCTCTCA
CUST_28383_PI429285431	3.88e-08	0.453847	lncRNA		CUST_28383_PI429285431	CUST_28383_PI429285431	FALSE	lncRNA	n325698|NULL|mRNAlikelncRNA|Homosapiens|vegalncRNA|GENCODE|OTTHUMT00000045269|http://vega.sanger.ac.uk/Homo_sapiens/Transcript/Summary?db=core;t=OTTHUMT00000045269|-0.8630100|-0.2038470		NONCODERv3	-				chr13	72885610	72885891	-	intergenic					GACAACTCAAATGATTTCTATCATTTCATTTTTTCCCCTGGACGTCTTCCTCCTGCAACT
CUST_13956_PI429285431	1.07e-05	0.449359	lncRNA		CUST_13956_PI429285431	CUST_13956_PI429285431	FALSE	lncRNA	lnc-ITGA11-2:3		lncipedia2.1	-				chr15	68778961	68779659	-	intergenic					TTGATTTCGTGGCTTTCTTTCTCCTCTTCTGGGATTTTGTGCCCTATTGCCACAGAAACC
CUST_47819_PI429285431	0.00111185	2.01649	lncRNA		CUST_47819_PI429285431	CUST_47819_PI429285431	FALSE	lncRNA	"gi|397140037|ref|XR_159139.1| PREDICTED: Homo sapiens long intergenic non-protein coding RNA 243 (LINC00243), misc_RNA"		ncbi	-				NT_167245.1	2074738	2076809	-						GGAATTAAGTTTGGTGAAGTTCAAAGAAGCTGATGTTACTCACAAGAGTAAATAGAGAGG
CUST_45441_PI429285431	1.95e-06	2.90613	lncRNA		CUST_45441_PI429285431	CUST_45441_PI429285431	FALSE	lncRNA	"gi|341915484|ref|XR_108954.2| PREDICTED: Homo sapiens uncharacterized LOC100506119, transcript variant 4 (LOC100506119), misc_RNA"		ncbi	-													GTTTAAGGCATTTCCAAAGCTCTGTTATTAAAAACACGATGCAATGAGTTTCTTTCAGCA
CUST_5380_PI429285431	6.48e-10	0.411207	lncRNA		CUST_5380_PI429285431	CUST_5380_PI429285431	FALSE	lncRNA	"transcript_id ""ENST00000568394.1"" | genecode_v17"		gencode_v17	-				chr16	1025761	1028760	-	intergenic					AGACACCTGGACTACAGATCGCAGCCTGATTCCTGGTCATTGCTCCACTGAACCCCAGAC
CUST_51152_PI429285431	6.83e-07	3.39924	lncRNA		CUST_51152_PI429285431	CUST_51152_PI429285431	FALSE	lncRNA	hg19_lincRNAsTranscripts_TCONS_l2_00007972 range=chr14:21189090-21190291 5'pad=0 3'pad=0 strand=- repeatMasking=none		UCSC	-				chr14	21189090	21189979	-	intergenic					TACAGCAAGTTATAGTTACATCAGGGTCAGGACACAGGTTGAACATCATGGCAGAGAACG
CUST_10459_PI429285431	3.03e-09	0.316488	lncRNA		CUST_10459_PI429285431	CUST_10459_PI429285431	FALSE	lncRNA	lnc-GDAP2-1:4		lncipedia2.1	-				chr1	118148179	118148941	-	exonic_antisense	FAM46C	+	54855	"family with sequence similarity 46, member C"	AGTGTGGTTCTCCTGTCTGTCAGACTATGAAGAGTTCTCAAATATGTCTTTCCCAGCGAG
CUST_44069_PI429285431	0.000199332	0.417898	lncRNA		CUST_44069_PI429285431	CUST_44069_PI429285431	FALSE	lncRNA	"gi|299829179|ref|NR_033879.1| Homo sapiens uncharacterized LOC348761 (LOC348761), non-coding RNA"		ncbi	-				Chr2	231852083	231852608	-	intergenic					AGAAAGAAACAAAGCTTAACCGCTGCCTCCTGTCCCCCATGGTCTGTGAAAGTCTCATAC
CUST_14499_PI429285431	4.24e-07	2.84346	lncRNA		CUST_14499_PI429285431	CUST_14499_PI429285431	FALSE	lncRNA	lnc-ARRDC3-1:7		lncipedia2.1	-				chr5	90612897	90613756	-	intergenic					CCAACAATATTTGAAACCCTTATCTGCGTGTACAAGTTTGCTACTGGTTTTGTTTTGCTC
CUST_51072_PI429285431	2.53e-06	0.392252	lncRNA		CUST_51072_PI429285431	CUST_51072_PI429285431	FALSE	lncRNA	hg19_lincRNAsTranscripts_TCONS_l2_00007126 range=chr13:38633779-38663794 5'pad=0 3'pad=0 strand=- repeatMasking=none		UCSC	-				chr13	38633779	38633988	-	intergenic					CTTGTCCATGCACCTGTCTGCTTCCTTGGCTTCAGAGCATTGCCTCCAAGTCCTCTACAG
CUST_12753_PI429285431	0.00228279	0.403497	lncRNA		CUST_12753_PI429285431	CUST_12753_PI429285431	FALSE	lncRNA	lnc-ZNF140-1:1		lncipedia2.1	-				chr12	133699876	133701742	+	intronic_antisense	ZNF891	-			ATTTCACCCGAAGTTCTCCCTGTAGCCAAAGAAGCAAGTTCAGGTAAAAGAAGAAAGCTG
CUST_5806_PI429285431	4.77e-05	0.496183	lncRNA		CUST_5806_PI429285431	CUST_5806_PI429285431	FALSE	lncRNA	"transcript_id ""ENST00000585025.1"" | genecode_v17"		gencode_v17	-				chr17	30157750	30158146	+	intergenic					TGAGGTCACCCTATCTCCCAGCCCTCCTTCACCAGATACAGGCAGAAACCCTCAAGCCAG
LNCA_19_P00322992	4.98e-10	2.56156	lncRNA		LNCA_21_P0000263	LNCA_21_P0000263	FALSE	lncRNA	NR_002576	NR_002576	Agilent_HUMAN_G3V2	-	SNORA21	"small nucleolar RNA, H/ACA box 21"		chr17	37009118	37009177	-	intronic_sense	RPL23	-	9349	ribosomal protein L23	AACATCGCTTTTGGGTGAAGTGGCAACATGTGTTGTTTGCTTCAATCGGTGGTGTGACAA
CUST_31937_PI429285431	1.71e-06	0.424437	lncRNA		CUST_31937_PI429285431	CUST_31937_PI429285431	FALSE	lncRNA	n338493|BC040412|mRNAlikelncRNA|Homosapiens|HumanlncRNA|JounralRNA|890|NULL|-1.1707700|-0.2081943		NONCODERv3	-				chr19	31398105	31398514	+	intergenic					AATAGGAAAGCTATGTCCTTCCTGCACAATTTCAGCCCTAAGAATCTGTGACTCTCCCTC
CUST_40760_PI429285431	1.02e-07	0.484773	lncRNA		CUST_40760_PI429285431	CUST_40760_PI429285431	FALSE	lncRNA	n410479|NR_037625_4|lncRNA|Homosapiens||RefGeneNoncode|NR_037625_4||-0.8197030|-0.2330137		NONCODERv3	-				chr6	4275529	4278528	+	intergenic					AATGTCAAAGATGATGAGGTCCCTTCTCTGGTAAAGGGTGCATTTATTTCAGCCCAGGTG
CUST_40508_PI429285431	4.36e-08	4.75366	lncRNA		CUST_40508_PI429285431	CUST_40508_PI429285431	FALSE	lncRNA	n409499|NR_033884|lncRNA|Homosapiens||RefGeneNoncode|NR_033884||0.7701140|-0.2728197		NONCODERv3	-				chr6	3020389	3023388	-	intergenic					GTTACGTGAACACGGCACAGTGGTACAATGCCATCAGACTAAATTTTTTAAAAGTTTTAA
CUST_3301_PI429285431	1.02e-05	0.398542	lncRNA		CUST_33034_PI429285431	CUST_33034_PI429285431	FALSE	lncRNA	n339721|AF244571|mRNAlikelncRNA|Homosapiens|HumanlncRNA|JounralRNA|2166|NULL|-1.0899900|-0.3979875		NONCODERv3	-				chr3	184672288	184673767	+	intronic_sense	VPS8	+	23355	vacuolar protein sorting 8 homolog (S. cerevisiae)	AGGGAATGGCCAGTCACTGAACAAACTTCTGTATTAAAGGCAGTTATAAGATACAAAAAA
CUST_19298_PI429285431	2.46e-08	0.423667	lncRNA		CUST_19298_PI429285431	CUST_19298_PI429285431	FALSE	lncRNA	lnc-C1QTNF8-1:5		lncipedia2.1	-				chr16	1116919	1117387	-	intergenic					CTGCATGCGGCTGAGGACCCCCAAGCCAGGCAGACCCCGACCCAGACCCCACGCGGCCGC
CUST_18360_PI429285431	8.32e-06	2.22234	lncRNA		CUST_1836_PI429285431	CUST_1836_PI429285431	FALSE	lncRNA	"transcript_id ""ENST00000504082.1"" | genecode_v17"		gencode_v17	-				chr4	106058437	106058985	-	intergenic					AGATGGAAATAATGTCATAGAACGTCTCTCACAACTGTGTTATAAGAATGACAGGGAAGC
CUST_18217_PI429285431	2.34e-06	0.298441	lncRNA		CUST_1821_PI429285431	CUST_1821_PI429285431	FALSE	lncRNA	"transcript_id ""ENST00000603220.1"" | genecode_v17"		gencode_v17	-				chr4	90040435	90041022	+	intergenic					TTGGCAGGGGCCTGAGAGCTTTTTTCCCTCCTGACACCAAATAAATGGTATCTTTTCCAA
CUST_48247_PI429285431	7.31e-07	2.69926	lncRNA		CUST_48247_PI429285431	CUST_48247_PI429285431	FALSE	lncRNA	hg19_lincRNAsTranscripts_TCONS_l2_00000962 range=chr1:701707-714032 5'pad=0 3'pad=0 strand=- repeatMasking=none		UCSC	-				chr1	701707	702037	-	intergenic					CGTATCGCTGATCTACGTAAACAAACTGAAGAATTGTCTGAAAGAAAATATGACATGAAC
CUST_6177_PI429285431	1.82e-08	0.36924	lncRNA		CUST_6177_PI429285431	CUST_6177_PI429285431	FALSE	lncRNA	"transcript_id ""ENST00000582983.1"" | genecode_v17"		gencode_v17	-				chr18	47025760	47027949	+	intergenic					ATATTGCTGATCAACTAGACAACCTACTTCCACTCTTGATTGCCCCTGTAATCCATCTAG
CUST_48101_PI429285431	8e-07	3.08201	lncRNA		CUST_48101_PI429285431	CUST_48101_PI429285431	FALSE	lncRNA	"gi|397138457|ref|XR_159496.1| PREDICTED: Homo sapiens uncharacterized LOC100996787 (LOC100996787), misc_RNA"		ncbi	-													GCCACAATCCTGACCATATCTTCAAGTGAACAGAAAAATTCTATTAAAAAGTCAACCTTC
CUST_51153_PI429285431	1.89e-06	0.383231	lncRNA		CUST_51153_PI429285431	CUST_51153_PI429285431	FALSE	lncRNA	hg19_lincRNAsTranscripts_TCONS_l2_00007617 range=chr14:22191912-22192543 5'pad=0 3'pad=0 strand=+ repeatMasking=none		UCSC	-				chr14	22191912	22192453	+	intergenic					AAGCTGAATTTAACAAGAGCCAAACCTCCTTCCACCTGAAGAAACCATCTGCCCTTGTGA
LNCA_21_P0001031	2.38e-08	2.81095	lncRNA	XLOC_000471	LNCA_21_P0003024	LNCA_21_P0003024	FALSE	lncRNA			Agilent_HUMAN_G3V2	-	XLOC_002793			chr3	125485629	125505694	+	intergenic					ACCGGCACCCAGACAGGTGGCGACGGCAGAGGAGAAGGAAAATACATGTACAGCCAACTT
CUST_35535_PI429285431	1.63e-07	2.07571	lncRNA		CUST_35559_PI429285431	CUST_35559_PI429285431	FALSE	lncRNA	n342689|BX648020|mRNAlikelncRNA|Homosapiens|HumanlncRNA|JounralRNA|5191|NULL|-0.4515200|-0.1783166		NONCODERv3	-				chr17	28863441	28864977	-	intergenic					TCAAATGATAAGTTCTTATAAGGTCTGAGGCTGTGTCATCATCTCCCTCTTCACCCCCAG
CUST_12775_PI429285431	0.000535265	0.433804	lncRNA		CUST_12775_PI429285431	CUST_12775_PI429285431	FALSE	lncRNA	lnc-FAM46A-2:3		lncipedia2.1	-				chr6	82605130	82607324	-	intergenic					CTCTTCTCCCCATCTCTACCTTACCCCTCTGGGTAGCAAGGAAAAATAAAAATAATGTCA
LNCA_19_P00806637	7.78e-08	0.459585	lncRNA	XLOC_002473	LNCA_21_P0000926	LNCA_21_P0000926	FALSE	lncRNA			Agilent_HUMAN_G3V2	-	LOC100130417	uncharacterized LOC100130417		chr1	853469	854237	-	intergenic					ATCTTCAGCAGACATTGCCCAGTGCAAGGGGAGTCCAGCCCCAGACTGACTTTCTGAGGT
CUST_29130_PI429285431	2.8e-05	0.495906	lncRNA		CUST_29130_PI429285431	CUST_29130_PI429285431	FALSE	lncRNA	n326634|NULL|mRNAlikelncRNA|Homosapiens|vegalncRNA|GENCODE|OTTHUMT00000001204|http://vega.sanger.ac.uk/Homo_sapiens/Transcript/Summary?db=core;t=OTTHUMT00000001204|-1.0202600|-0.1918952		NONCODERv3	-				chr1	38713454	38714243	+	intergenic					GTTTCTGTTTCTGCTTCTCTGTGTTCTCATCGTGTCTCTGAGATGCTCTCTTGGTTTGTA
CUST_25009_PI429285431	1.4e-08	2.04104	lncRNA		CUST_25009_PI429285431	CUST_25009_PI429285431	FALSE	lncRNA	lnc-TIMM9-2:8		lncipedia2.1	-				chr14	58764673	58767032	-	exonic_antisense	ARID4A	+	5926	AT rich interactive domain 4A (RBP1-like)	GTTTGTGGTACCAGCATCAAGATGATTTATGGTAATAAGGTACTCAGTCTTTGCTTAAAA
CUST_15825_PI429285431	1.04e-08	0.463641	lncRNA		CUST_15825_PI429285431	CUST_15825_PI429285431	FALSE	lncRNA	lnc-PIEZO2-7:1		lncipedia2.1	-				chr18	10247401	10249361	-	intergenic					CCTGTTAAACAGCCAAAATGAAGCAGAAAAATAGCTCCACCTCACTTCTCTCCTACAAAT
CUST_13931_PI429285431	3.64e-09	0.471209	lncRNA		CUST_13931_PI429285431	CUST_13931_PI429285431	FALSE	lncRNA	lnc-PPP1R14C-1:1		lncipedia2.1	-				chr6	150593859	150594226	+	intergenic					TTTCTTCATGGATTCCAACTGCTTGATTTGTGGGAATGACTCAACCATGCCTGTTCTCCC
CUST_47299_PI429285431	1.85e-05	2.09733	lncRNA		CUST_47299_PI429285431	CUST_47299_PI429285431	FALSE	lncRNA	"gi|308082007|ref|NR_036658.1| Homo sapiens ZNFX1 antisense RNA 1 (ZNFX1-AS1), transcript variant 4, non-coding RNA"		ncbi	-				Chr20	47894715	47895673	+	intergenic					AGGCTTTGATTGAACCAGGATGAATGCGGGTGTTGGAAGTAGAATATATATATACATATA
LNCA_19_P00808382	1.01e-06	0.472283	lncRNA	LOC100506334	LNCA_21_P0001031	LNCA_21_P0001031	FALSE	lncRNA			Agilent_HUMAN_G3V2	-	XLOC_000471			chr1	176176953	176187674	+	bidirectional	RFWD2	-	64326	ring finger and WD repeat domain 2	CTCCTGCTCTACTGATGGTGATTCCACAGCTTTGTGAGGAATAAGTTAAGATGAATTACA
CUST_6646_PI429285431	1.52e-05	0.35719	lncRNA		CUST_6646_PI429285431	CUST_6646_PI429285431	FALSE	lncRNA	"transcript_id ""ENST00000427835.2"" | genecode_v17"		gencode_v17	-				chr20	11790635	11791192	-	intergenic					AAGCTGATTGCTTCTTACTGCAAGCACTTGAGCATCTTCCTGAGAGCTTTCTTGGGCAAT
LNCA_21_P0013099	0.00180028	0.463604	lncRNA	XLOC_l2_013125	LNCA_33_P3364293	LNCA_33_P3364293	FALSE	lncRNA	NR_027420	NR_027420	Agilent_HUMAN_G3V2	-	LOC389834	ankyrin repeat domain 57 pseudogene		chr21	9921687	9921746	-	intergenic					AAAGGTGCCTCCTCCATCTCACCACCTACAAACTCTCACACGTCCTGGAAGATGGGGGGA
CUST_36177_PI429285431	5.06e-07	0.471825	lncRNA		CUST_36177_PI429285431	CUST_36177_PI429285431	FALSE	lncRNA	n344735|NULL|lincRNA|Homosapiens|HumanlincRNA|ScriptureReconstructionLincRNAsByLuo[unpublished]|linc_luo_284|NULL|-1.3228100|-0.2429238		NONCODERv3	-				chr2	16201121	16203648	-	intergenic					ATGATTATAGAAAAATGTATATATCTGCTGGAAAACTCCTTTCTCCCCTCTTCCAGAAAG
LNCA_23_P9280	4.96e-08	3.45309	lncRNA	LOC389765
CUST_16320_PI429285431	0.0113789	0.494247	lncRNA		CUST_16320_PI429285431	CUST_16320_PI429285431	FALSE	lncRNA	lnc-NAP1L2-1:7		lncipedia2.1	-				chrX	73064217	73067216	-	intergenic					TGTGTGATTATATTTGTCCAGGTTTCTGTGTACTAGACAAGGAAGCCTCCTCTGCCCCAT
CUST_17676_PI429285431	4.87e-06	2.31495	lncRNA		CUST_17676_PI429285431	CUST_17676_PI429285431	FALSE	lncRNA	lnc-ARRDC3-1:5		lncipedia2.1	-				chr5	90609897	90610724	-	intergenic					CAATGAAAAGGAACAAAACCCATCAGAAGATGTCAGAAGATAAGGATTTTTGTCCTGATG
CUST_48154_PI429285431	0.00282302	2.52784	lncRNA		CUST_48154_PI429285431	CUST_48154_PI429285431	FALSE	lncRNA	"gi|397137705|ref|XR_133067.2| PREDICTED: Homo sapiens U3 small nucleolar ribonucleoprotein protein MPP10-like (LOC100653133), misc_RNA"		ncbi	-													GGAACAGCCACTGGGAGATAACTAGCAGCTTTTACCATTTGTCATTTAATTATTTTAAAG
CUST_37863_PI429285431	8.14e-07	0.447005	lncRNA		CUST_37863_PI429285431	CUST_37863_PI429285431	FALSE	lncRNA	n346399|NULL|lincRNA|Homosapiens|HumanlincRNA|ScriptureReconstructionLincRNAsByLuo[unpublished]|linc_luo_1949|NULL|-1.3140500|-0.2076451		NONCODERv3	-				chr6	37521902	37524901	+	intergenic					GAGTGTTATTCTACATCTCATGCCCTCTCTGAGTTTTTGTTCATGTCTGCCTTCTCCTGT
CUST_40132_PI429285431	3.39e-06	0.45566	lncRNA		CUST_4013_PI429285431	CUST_4013_PI429285431	FALSE	lncRNA	"transcript_id ""ENST00000530792.1"" | genecode_v17"		gencode_v17	-				chr11	74919099	74919593	-	intergenic					TTGGATCCCCAGAGGTGGTTTTCACTTGCCCCCCATTGCCTATACCATGTTGCCTTCCTG
CUST_41179_PI429285431	1e-09	0.395346	lncRNA		CUST_41179_PI429285431	CUST_41179_PI429285431	FALSE	lncRNA	ENST00000581077 ncrna:miRNA chromosome:GRCh37:15:75081013:75081098:-1 gene:ENSG00000264386 gene_biotype:miRNA transcript_biotype:miRNA		ensembl.GRCh37.72	-				chr15	75081013	75081098	-	intronic_antisense	CSK	+	1445	c-src tyrosine kinase (EC:2.7.10.2)	GAGGCCCATAAGCTGTCTAAAACTTCGGCCCCCAGATTTCTGGTCTCCCCACTTCAGAAC
CUST_41611_PI429285431	5.53e-05	0.456294	lncRNA		CUST_41611_PI429285431	CUST_41611_PI429285431	FALSE	lncRNA	ENST00000584324 ncrna:miRNA chromosome:GRCh37:HSCHR6_MHC_DBB:31906802:31906903:-1 gene:ENSG00000265895 gene_biotype:miRNA transcript_biotype:miRNA		ensembl.GRCh37.72	-				chrHSCHR6_MHC_DBB	31906802	31906903	-	intergenic					ATGGAGCTGACCTTCATCATGGCTTGGCCAACATAATGCCTCTTCCCCTTGTCTCTCCAG
CUST_37162_PI429285431	5.25e-06	0.498691	lncRNA		CUST_37166_PI429285431	CUST_37166_PI429285431	FALSE	lncRNA	n345602|NULL|lincRNA|Homosapiens|HumanlincRNA|ScriptureReconstructionLincRNAsByLuo[unpublished]|linc_luo_1151|NULL|-1.3574000|-0.2127178		NONCODERv3	-				chr3	156849514	156850164	-	intergenic					GGTACATTTTTTGCAGCATTTCCTCCTCTCCATATAGACTGTTCTCATTCTGCAGGGCTG
CUST_17979_PI429285431	1.41e-05	0.449244	lncRNA		CUST_17979_PI429285431	CUST_17979_PI429285431	FALSE	lncRNA	lnc-XRCC4-1:1		lncipedia2.1	-				chr5	82687126	82687437	+	intergenic					GCATCTGGATTCACAGCAATAAGGAATTACCAATGGCAATGCTAAGGAAAGATGGCTGGC
CUST_52070_PI429285431	5.08e-07	0.383793	lncRNA		CUST_52070_PI429285431	CUST_52070_PI429285431	FALSE	lncRNA	hg19_lincRNAsTranscripts_TCONS_l2_00017851 range=chr22:16186809-16193039 5'pad=0 3'pad=0 strand=- repeatMasking=none		UCSC	-				chr22	16186809	16187565	-	intergenic					GAGCTTCGGAGAAGCAGTGGTGGGTTCCATGTGATGGTGGAGTAGGAGGCAGGTCTCCGC
CUST_3733_PI429285431	0.03445	0.42781	lncRNA		CUST_37338_PI429285431	CUST_37338_PI429285431	FALSE	lncRNA_mRNA	n345780|NULL|lincRNA|Homosapiens|HumanlincRNA|ScriptureReconstructionLincRNAsByLuo[unpublished]|linc_luo_1329|NULL|-1.3476600|-0.4841303		NONCODERv3	"ENST00000416070,ENST00000346152,ENST00000353920,ENST00000324896"				chr7	74607897	74608625	-	intergenic					GAAATTTGGTGAAGCTATTGGTATGGGTTTTCCTGTGAAAGTTCCCTACAGGAAAATCAC
LNCA_21_P0006778	1.7e-05	0.293418	lncRNA	XLOC_008897	LNCA_21_P0010399	LNCA_21_P0010399	FALSE	lncRNA			Agilent_HUMAN_G3V2	-	XLOC_014174			chr22	23893653	23893712	+	intergenic					TTCCATTTATTCCTCTGTTCACCCTGCCATTTATCCTCCCATTCACTCTCCAATCTATCC
CUST_47429_PI429285431	2.24e-06	2.63192	lncRNA		CUST_47429_PI429285431	CUST_47429_PI429285431	FALSE	lncRNA	"gi|338970360|ref|NR_040115.1| Homo sapiens ANKRD62P1-PARP4P3 readthrough (non-protein coding) (ANKRD62P1-PARP4P3), non-coding RNA"		ncbi	-				Chr22	17134598	17136136	-	intergenic					AACTGGATGACGCTTCTATTTCCAGAATATTCCCTGGGCTTTTGAAGCAATAAAGAAAGC
CUST_45392_PI429285431	3.93e-06	0.389671	lncRNA		CUST_45392_PI429285431	CUST_45392_PI429285431	FALSE	lncRNA	"gi|201025394|ref|NR_024129.1| Homo sapiens long intergenic non-protein coding RNA 92 (LINC00092), non-coding RNA"		ncbi	-													AGCATCCCGGGTGTGTATTTCAGAACTCCTCCCATCTTATCCACCTGCTGAAGGCCTGGC
CUST_32174_PI429285431	1.93e-05	0.375063	lncRNA		CUST_32174_PI429285431	CUST_32174_PI429285431	FALSE	lncRNA	n338745|BC026300|mRNAlikelncRNA|Homosapiens|HumanlncRNA|JounralRNA|1166|NULL|-1.0867400|-0.2489569		NONCODERv3	-				chr13	54689923	54691006	-	intergenic					GCATCCTGTCTCCCATTTTTGCTAAAATTCTATCTAGAGAAAGAGCTCATTTTTAGCTAA
CUST_5881_PI429285431	2.87e-05	0.491693	lncRNA		CUST_5881_PI429285431	CUST_5881_PI429285431	FALSE	lncRNA	"transcript_id ""ENST00000579972.1"" | genecode_v17"		gencode_v17	-				chr17	46537732	46538432	+	intergenic					CACAGCTACTTCCTCCTGCTTTAGAACAGAGCTAAATAAACCTGTTCCTAAGTCTTGTGA
CUST_5778_PI429285431	9.15e-08	0.49151	lncRNA		CUST_577_PI429285431	CUST_577_PI429285431	FALSE	lncRNA	"transcript_id ""ENST00000440104.1"" | genecode_v17"		gencode_v17	-				chr1	221681901	221682707	+	intergenic					TTTTCTACCATACTGATAGGCCCACTGATGAACCTTTACAGTCCTCCTCTTTGAGCCATG
CUST_22459_PI429285431	3.92e-08	0.444742	lncRNA		CUST_22459_PI429285431	CUST_22459_PI429285431	FALSE	lncRNA	lnc-GTPBP1-1:2		lncipedia2.1	-				chr22	39134870	39135396	+	exonic_antisense	SUN2	-			AACTTAAGAACCAATAGTGCAGCATTTGTAACAGGGACTGAAGTGCTGTCTCCCACCCTA
CUST_45132_PI429285431	2.32e-06	0.457558	lncRNA		CUST_45132_PI429285431	CUST_45132_PI429285431	FALSE	lncRNA	"gi|341915414|ref|XR_132725.1| PREDICTED: Homo sapiens uncharacterized LOC100507530 (LOC100507530), misc_RNA"		ncbi	-				Chr8	6473124	6474719	-	intergenic					AATATGCCGTATCATTCCTTAATGCATGCATTTTTTCCCCAGTTCCCTACAATCTTATAA
CUST_12951_PI429285431	9.93e-08	0.435476	lncRNA		CUST_12958_PI429285431	CUST_12958_PI429285431	FALSE	lncRNA	lnc-MPP7-1:1		lncipedia2.1	-				chr10	28618858	28619184	-	intergenic					GGTGACAGTGTCTCCCGGAAGTACAGAAAAACCCCAATAATTGATATGGGATTATATAAA
CUST_15144_PI429285431	2.8e-07	4.01381	lncRNA		CUST_15144_PI429285431	CUST_15144_PI429285431	FALSE	lncRNA	lnc-NUMB-1:3		lncipedia2.1	-				chr14	73930181	73930958	-	intergenic					GTTTACAGAGAAAACTCTACAACAAAGACTTAACCCTTCCCGGGTAACCACGAATGTGAG
CUST_3838_PI429285431	5.97e-07	0.387946	lncRNA		CUST_38380_PI429285431	CUST_38380_PI429285431	FALSE	lncRNA	n382275|NULL|lncRNA|Homosapiens||UCSCGeneNoncode|uc001ykl.1||-0.0035634|-0.2296444		NONCODERv3	-				chr14	102262243	102263247	+	intronic_sense	PPP2R5C	+	5527	"protein phosphatase 2, regulatory subunit B', gamma isoform"	ATTTGCCATGATATCTTAATGAGAGGACACAGTCCCTGGATTGCTGAGGCAGTTCACACT
CUST_49419_PI429285431	9.35e-06	0.452107	lncRNA		CUST_49445_PI429285431	CUST_49445_PI429285431	FALSE	lncRNA	hg19_lincRNAsTranscripts_TCONS_l2_00022707 range=chr5:180708380-180720947 5'pad=0 3'pad=0 strand=+ repeatMasking=none		UCSC	-				chr5	180708380	180708893	+	intergenic					GAAAATATGACATGAACTTATGAATTCAACAGGTGAAGATTTACAACTTGATAAATCAAC
CUST_17266_PI429285431	1.03e-06	2.523	lncRNA		CUST_17266_PI429285431	CUST_17266_PI429285431	FALSE	lncRNA	lnc-ARRDC3-1:3		lncipedia2.1	-				chr5	90610149	90610360	-	intergenic					TATTTCTGACTTGGCTTTCTTGTATTTCTCTCACGTTAACAAAATTGGTTCAGCATCTAC
CUST_773_PI429285431	1.67e-07	0.441067	lncRNA		CUST_773_PI429285431	CUST_773_PI429285431	FALSE	lncRNA	"transcript_id ""ENST00000426539.1"" | genecode_v17"		gencode_v17	-				chr2	16190549	16191644	+	intergenic					TTTACTTAATGCAGGTTAACTTCATCAACCCTGGTGAAAATGCCACCTCCTCATGAGGAA
CUST_17640_PI429285431	1.64e-07	3.60866	lncRNA		CUST_17640_PI429285431	CUST_17640_PI429285431	FALSE	lncRNA	lnc-NUMB-1:4		lncipedia2.1	-				chr14	73930181	73930558	-	intergenic					GTGTATGAAATAGCGGCTGACTTTTGTGACAATTTTCCACCCAGTTTTGTGATAGTAATT
CUST_18922_PI429285431	3.41e-08	2.52143	lncRNA		CUST_18922_PI429285431	CUST_18922_PI429285431	FALSE	lncRNA	lnc-WDFY2-2:1		lncipedia2.1	-				chr13	52123846	52124311	+	intergenic					TAAAATACAAGCTGAGTTAGAGACAGCCCTTGTAAGACTAGGAAAGGCCTTGTGAGGACA
CUST_28789_PI429285431	0.000939709	0.315204	lncRNA		CUST_28789_PI429285431	CUST_28789_PI429285431	FALSE	lncRNA	n326196|NULL|mRNAlikelncRNA|Homosapiens|vegalncRNA|GENCODE|OTTHUMT00000099069|http://vega.sanger.ac.uk/Homo_sapiens/Transcript/Summary?db=core;t=OTTHUMT00000099069|-0.0487314|-0.3583106		NONCODERv3	-				chr1	227295184	227295782	-	intronic_sense	CDC42BPA	-	8476	CDC42 binding protein kinase alpha (DMPK-like) (EC:2.7.11.1)	ACAGACCCTCCTGCACTCCACAACCCCACTCCAGCGGCTTGTTAAAAAAAGACAGGCCAC
CUST_44465_PI429285431	3.56e-07	6.15427	lncRNA		CUST_44465_PI429285431	CUST_44465_PI429285431	FALSE	lncRNA	"gi|148237772|ref|NR_003542.1| Homo sapiens proteoglycan 3 pseudogene (SLED1), non-coding RNA"		ncbi	-				Chr4	185719450	185720200	-	intergenic					GCATTGAGATGACTGACTTGTCAAATTAGTTCGGAAAGATTTTTGACAACTACTACAAGA
CUST_36027_PI429285431	0.0164071	2.11443	lncRNA		CUST_36027_PI429285431	CUST_36027_PI429285431	FALSE	lncRNA	n344637|NULL|lincRNA|Homosapiens|HumanlincRNA|ScriptureReconstructionLincRNAsByLuo[unpublished]|linc_luo_185|NULL|-1.3340200|-0.3109463		NONCODERv3	-				chr11	65192792	65195791	-	intergenic					CAACGTTGTTGTCGTCACCTTTCAACTCTGTGTAAGGAGAAAACACCCACATATCACTTC
CUST_17041_PI429285431	0.00040952	0.213823	lncRNA		CUST_17041_PI429285431	CUST_17041_PI429285431	FALSE	lncRNA	lnc-KIAA0232-1:1		lncipedia2.1	-				chr4	6769175	6769509	+	intergenic					TATACACTTCTCCCAAAATCCTGTGCTTAACACATTGTTACTGAGCACACAGGCGTGCTG
CUST_51519_PI429285431	8.69e-08	3.46604	lncRNA		CUST_51519_PI429285431	CUST_51519_PI429285431	FALSE	lncRNA	hg19_lincRNAsTranscripts_TCONS_l2_00009914 range=chr16:90282378-90289178 5'pad=0 3'pad=0 strand=+ repeatMasking=none		UCSC	-				chr16	90282378	90283133	+	intergenic					TATTAATATAAGGGAGAAATGTTTAAATCTGTCTATGCCACATGTGCCTTCGGCTTATTG
LNCA_21_P0009799	6.12e-07	0.380965	lncRNA	XLOC_013195	LNCA_21_P0013818	LNCA_21_P0013818	FALSE	lncRNA			Agilent_HUMAN_G3V2	-	XLOC_l2_015752			chrX	70886008	70888332	-	intergenic					TGGTGCTAATGATCACCCTAATCACCGGCCCCACCAGGATGTCTACCCACGACTCTGATT
CUST_9804_PI429285431	2.84e-08	0.433664	lncRNA		CUST_9804_PI429285431	CUST_9804_PI429285431	FALSE	lncRNA	lnc-TCF4-1:2		lncipedia2.1	-				chr18	53453380	53454103	-	intergenic					ACAGTTCAGAAAAGCATAAAGATGCAAATAAAAATAGTTCACCCCCATCGCTTTGCATAC
CUST_24356_PI429285431	2.7e-10	4.1879	lncRNA		CUST_24384_PI429285431	CUST_24384_PI429285431	FALSE	lncRNA	lnc-DYX1C1-CCPG1-2:2		lncipedia2.1	-				chr15	55790405	55791697	-	exonic_sense	DYX1C1	-	161582	dyslexia susceptibility 1 candidate 1	GAAAACCTGAAAGATGTCTGAAAATTCCAGTGACAGTGATTCATCTTGTGGTTGGACTGT
CUST_3025_PI429285431	0.00019358	0.438097	lncRNA		CUST_30255_PI429285431	CUST_30255_PI429285431	FALSE	lncRNA	n335131|AY187245|mRNAlikelncRNA|Homosapiens|NULL|H-invitationalv7.5|HIT000250930|http://h-invitational.jp/hinv/spsoup/transcript_view?hit_id=HIT000250930|-0.1967370|-0.0955316		NONCODERv3	-				chr16	50727537	50728018	-	intergenic					TTTCATCACATTCATACTGGCTGACGAAACCCCGCTCCCATGCCAGGTCCAGCATGTTCT
LNCA_33_P3306048	4.99e-08	2.50588	lncRNA	DPRXP4
CUST_22933_PI429285431	1.01e-06	3.24719	lncRNA		CUST_22933_PI429285431	CUST_22933_PI429285431	FALSE	lncRNA	lnc-ZNF37A-3:1		lncipedia2.1	-				chr10	38736592	38739591	+	intergenic					AGTGCATGCATCAAGTGCAATGGGAAGCTCTTCTGGAGAGTGAGATAAGCTTCCAGTTAA
CUST_18831_PI429285431	6.73e-08	0.319522	lncRNA		CUST_18831_PI429285431	CUST_18831_PI429285431	FALSE	lncRNA	lnc-HSCB-1:2		lncipedia2.1	-				chr22	28393399	28393954	+	intronic_antisense	TTC28	-	23331	tetratricopeptide repeat domain 28	TTGGTGTTCCTCTGTTTCCCAAAGTTTGAGACACTTTCAGACACTCTGCTTTGCGGTTGT
CUST_9093_PI429285431	4.13e-08	0.26318	lncRNA		CUST_9093_PI429285431	CUST_9093_PI429285431	FALSE	lncRNA	lnc-TCP11L1-1:1		lncipedia2.1	-				chr11	33211479	33212046	+	intergenic					ATGATGTGCTTTGGGATTTGGGACTTAACCTCCTTGGCCTTTTTGAGGACTTTGATAGAC
CUST_7444_PI429285431	6.61e-09	0.427271	lncRNA		CUST_7444_PI429285431	CUST_7444_PI429285431	FALSE	lncRNA	lnc-PDZD7-4:2		lncipedia2.1	-				chr10	102890514	102891417	-	exonic_sense	TLX1NB	-	100038246	TLX1 neighbor	ACTGATCAAAACCTTAAGACTTGAGGATTCTGGTTCCTTGTGCTGGGGGTCTCCATCTAT
CUST_48944_PI429285431	0.00350705	0.489939	lncRNA		CUST_48944_PI429285431	CUST_48944_PI429285431	FALSE	lncRNA	hg19_lincRNAsTranscripts_TCONS_l2_00019610 range=chr3:162937672-162996391 5'pad=0 3'pad=0 strand=- repeatMasking=none		UCSC	-				chr3	162937672	162938193	-	intergenic					AGCACATGATTCTTCCCCCTTCCATGATTCCAGTGGCCAATAGGTAATCAGAACTTCTCT
CUST_5327_PI429285431	4.77e-06	10.4554	lncRNA		CUST_5327_PI429285431	CUST_5327_PI429285431	FALSE	lncRNA	"transcript_id ""ENST00000556030.1"" | genecode_v17"		gencode_v17	-				chr15	94408736	94409193	+	intergenic					CATAACCTCAACTTCTTTATCTGTACATTGGGAACAATAATTCTTACTCCACTTGTTGTG
CUST_12842_PI429285431	2.84e-08	0.452856	lncRNA		CUST_128_PI429201921	CUST_128_PI429201921	FALSE	lncRNA	TC01006169.hg.1		Affy_HUMAN_HTA2.0	-				chr1	228155358	228158853	-	intergenic					ATGGGGCTCATTCCTCACAACGGCCTTTCCAGGCCCAGTTTTTCCCTTCCGGCGGCCTCT
CUST_14068_PI429285431	8.71e-06	0.36229	lncRNA		CUST_14068_PI429285431	CUST_14068_PI429285431	FALSE	lncRNA	lnc-TNFAIP6-2:4		lncipedia2.1	-				chr2	151491749	151492609	+	intergenic					AGGCTTCTCCCACAGAGCTTCTTGTACAAATTAAAACAGGGCAGTAGAAGGTTTTCAGGT
CUST_10609_PI429285431	0.00137327	0.494574	lncRNA		CUST_10645_PI429285431	CUST_10645_PI429285431	FALSE	lncRNA	lnc-LGALSL-1:1		lncipedia2.1	-				chr2	64518279	64518860	+	intergenic					GAGAACAGCCTAAGCCAAGGGAGGGGAGATTCTAAAAGAAATGACTGTAATTAAAGGTAG
CUST_43252_PI429285431	3.48e-05	4.34406	lncRNA		CUST_43252_PI429285431	CUST_43252_PI429285431	FALSE	lncRNA	ENST00000518552 havana:sense_intronic chromosome:GRCh37:8:56806154:56808298:1 gene:ENSG00000254325 gene_biotype:sense_intronic transcript_biotype:sense_intronic		ensembl.GRCh37.72	-				chr8	56806154	56806826	+	intronic_sense	LYN	+	4067	v-yes-1 Yamaguchi sarcoma viral related oncogene homolog (EC:2.7.10.2)	CCAGTCTTGGGACATTAGATGAAGCTCCTTCATCTAATGTTTTTCTAATACATAAAACAG
CUST_28836_PI429285431	1.05e-10	0.491935	lncRNA		CUST_28836_PI429285431	CUST_28836_PI429285431	FALSE	lncRNA	n326249|NULL|mRNAlikelncRNA|Homosapiens|vegalncRNA|GENCODE|OTTHUMT00000090178|http://vega.sanger.ac.uk/Homo_sapiens/Transcript/Summary?db=core;t=OTTHUMT00000090178|-1.2299600|-0.3394137		NONCODERv3	-				chr1	210408171	210408680	+	intronic_sense	SERTAD4	+	56256	SERTA domain containing 4	TGGCTGCTAGGTCTTTTTACCTTCATATCAGACTCTCCTCTCCCTTGAACTTACTCTTGA
CUST_32670_PI429285431	2.23e-05	0.424973	lncRNA		CUST_32670_PI429285431	CUST_32670_PI429285431	FALSE	lncRNA	n339297|AK025619|mRNAlikelncRNA|Homosapiens|HumanlncRNA|JounralRNA|1729|NULL|0.3039660|-0.2702380		NONCODERv3	-				chr3	38492517	38495050	-	bidirectional	ACVR2B	+	93	"activin A receptor, type IIB (EC:2.7.11.30)"	ATTGGCTGGTTCCTCTCTTCTACTCCATACCAGGTCAGGTATCATAATAAGGACTCAGAG
CUST_15716_PI429285431	3.55e-08	0.456939	lncRNA		CUST_15722_PI429285431	CUST_15722_PI429285431	FALSE	lncRNA	lnc-RP11-419C23.1.1-2:1		lncipedia2.1	-				chr8	36839153	36840265	-	intergenic					TGACCCAGTAAGCATTTGCTCTTCAGAATCAAATCTCTGCTCTCCCTTGACTTACAATTC
CUST_41177_PI429285431	8.17e-08	2.04319	lncRNA		CUST_41177_PI429285431	CUST_41177_PI429285431	FALSE	lncRNA	ENST00000410899 ncrna:miRNA chromosome:GRCh37:1:236016300:236016360:-1 gene:ENSG00000222831 gene_biotype:miRNA transcript_biotype:miRNA		ensembl.GRCh37.72	-				chr1	236016300	236016360	-	intronic_sense	LYST	-	1130	lysosomal trafficking regulator	CAGCTGTAATTAGTCAGTTTTCTGTCCTGTCCACACAGAAAACCGTCTAGTTACAGTTGT
CUST_50783_PI429285431	1.94e-07	0.466395	lncRNA		CUST_50783_PI429285431	CUST_50783_PI429285431	FALSE	lncRNA	hg19_lincRNAsTranscripts_TCONS_l2_00004338 range=chr11:1799971-1825792 5'pad=0 3'pad=0 strand=+ repeatMasking=none		UCSC	-				chr11	1799971	1800474	+	intergenic					TTATCATCCATGCTTAAAGCTATTGGTTTTCCTGGAAGCGCAGTCAGCCCTCCATATGTG
CUST_37967_PI429285431	1.56e-07	3.27568	lncRNA		CUST_37967_PI429285431	CUST_37967_PI429285431	FALSE	lncRNA	n346516|NULL|lincRNA|Homosapiens|HumanlincRNA|ScriptureReconstructionLincRNAsByLuo[unpublished]|linc_luo_2066|NULL|-1.3608800|-0.2772202		NONCODERv3	-				chr1	224170583	224170965	-	intergenic					CATACCCTTTTTTCCAGTCTCATGTTGAAGATTTTTATGTAGAAGGCCTTCCCATGCTGG
CUST_26941_PI429285431	1.02e-09	0.480501	lncRNA		CUST_26941_PI429285431	CUST_26941_PI429285431	FALSE	lncRNA	n324022|NULL|mRNAlikelncRNA|Homosapiens|vegalncRNA|GENCODE|OTTHUMT00000053172|http://vega.sanger.ac.uk/Homo_sapiens/Transcript/Summary?db=core;t=OTTHUMT00000053172|-0.0957109|-0.2240657		NONCODERv3	-				chr9	95978704	95979990	-	intronic_antisense	WNK2	+	65268	WNK lysine deficient protein kinase 2 (EC:2.7.11.1)	ATTCTGACTCTTCTGGAGAAAAGGAAACCCCACACTCAGCACTGCTTCTCCCACTAAAGT
CUST_19374_PI429285431	2.63e-06	2.02976	lncRNA		CUST_19377_PI429285431	CUST_19377_PI429285431	FALSE	lncRNA	lnc-RFC5-1:1		lncipedia2.1	-				chr12	118328551	118329098	+	intronic_antisense	KSR2	-	283455	kinase suppressor of ras 2	CCTTGCTACATGGTTCATCACTGTCATCCCTCCCTTCAGAAAAATTAAATCATTCAAAGG
CUST_23038_PI429285431	0.00134349	0.3709	lncRNA		CUST_23038_PI429285431	CUST_23038_PI429285431	FALSE	lncRNA	lnc-TBCCD1-1:2		lncipedia2.1	-				chr3	186383368	186383776	-	bidirectional	HRG	+	3273	histidine-rich glycoprotein	TTTTCCTCCCCTCAAACCTGGCATCGGAGTTTATTGAAACAAAGCAAAATAAAACAAATA
LNCA_21_P0004675	6.88e-07	0.339249	lncRNA	XLOC_005421	LNCA_21_P0007948	LNCA_21_P0007948	FALSE	lncRNA			Agilent_HUMAN_G3V2	-	XLOC_010435			chr13	76587282	76588543	+	intergenic					TGAAATTATACCTCTGCTGCTTATTCTTGGTGTCTCCCTCATACCTCTCAGCATGTTCTC
LNCA_33_P3236218	2.01e-07	2.24374	lncRNA	LOC391767
CUST_11527_PI429285431	0.00218713	0.349925	lncRNA		CUST_11531_PI429285431	CUST_11531_PI429285431	FALSE	lncRNA	lnc-PAPPA2-1:1		lncipedia2.1	-				chr1	176198225	176198803	+	intergenic					CTCCTGCTCTACTGATGGTGATTCCACAGCTTTGTGAGGAATAAGTTAAGATGAATTACA
CUST_2352_PI429285431	1.64e-05	0.422779	lncRNA		CUST_23522_PI429285431	CUST_23522_PI429285431	FALSE	lncRNA	lnc-TTC40-4:1		lncipedia2.1	-				chr10	134899993	134900467	-	bidirectional	GPR123	+	84435	G protein-coupled receptor 123	GAGGGTGCTGCCTGCCTCCCTGACTCTTACCTCCCCAAGAGAGGAAAACAAAAGAAAAAA
CUST_50961_PI429285431	1.18e-07	0.449461	lncRNA		CUST_50961_PI429285431	CUST_50961_PI429285431	FALSE	lncRNA	hg19_lincRNAsTranscripts_TCONS_l2_00005764 range=chr12:76953674-77009090 5'pad=0 3'pad=0 strand=+ repeatMasking=none		UCSC	-				chr12	76953674	76954141	+	bidirectional	OSBPL8	-	114882	oxysterol binding protein-like 8	ACAGCTGAATTGATGATATGATGACAGGCTCATCCCTCCATTGTAAACTATGCTGCGTAA
CUST_10037_PI429285431	1.02e-08	0.489511	lncRNA		CUST_10040_PI429285431	CUST_10040_PI429285431	FALSE	lncRNA	lnc-RPP30-1:1		lncipedia2.1	-				chr10	92621370	92621633	+	intergenic					TCTTCAAGTTTTCTGGTGTTTAAAAGCCATATCAAGGTGTTGCTTCCTTCTTCCCTCCCG
CUST_41046_PI429285431	6.41e-08	0.43921	lncRNA		CUST_41046_PI429285431	CUST_41046_PI429285431	FALSE	lncRNA	n411715|NR_044997_3|lncRNA|Homosapiens||RefGeneNoncode|NR_044997_3||-1.1590600|-0.2486205		NONCODERv3	-				chr6	4498632	4499334	+	intergenic					GTTTTCTGAACTTTGCTTTTGTTGGTTTCTCTCCCCATCTCTCAGCTACCAAGGCCATTT
CUST_30489_PI429285431	3.49e-06	0.489781	lncRNA		CUST_304_PI429201921	CUST_304_PI429201921	FALSE	lncRNA	TC22000983.hg.1		Affy_HUMAN_HTA2.0	-				chr22	21311690	21318877	+	intergenic					ATGAAACACCCAAGTGTTAGGAACCAGAATAATCAGCCCTAATAGAGGGGAGGCTGATCA
CUST_27260_PI429285431	1.14e-05	0.378831	lncRNA		CUST_27260_PI429285431	CUST_27260_PI429285431	FALSE	lncRNA	n324406|NULL|mRNAlikelncRNA|Homosapiens|vegalncRNA|GENCODE|OTTHUMT00000042022|http://vega.sanger.ac.uk/Homo_sapiens/Transcript/Summary?db=core;t=OTTHUMT00000042022|-1.1535900|-1.0000000		NONCODERv3	-				chr6	121752734	121753004	+	intergenic					ACTGCTCTCCCATTACAATACTCTTCTTACAAGTCTAATCCGGAGCCACCAATTATTTAA
LNCA_21_P0002037	1.01e-10	0.284776	lncRNA	XLOC_002037	LNCA_21_P0004527	LNCA_21_P0004527	FALSE	lncRNA			Agilent_HUMAN_G3V2	-	XLOC_004554			chr5	133135107	133135166	+	intergenic					AATTCTAGAACTGAAGATGGGTTAAGCCACAGACACTGCTTCTCATCTCCATACCTCCGA
CUST_21520_PI429285431	1.25e-06	0.471947	lncRNA		CUST_21520_PI429285431	CUST_21520_PI429285431	FALSE	lncRNA	lnc-KLHL28-1:1		lncipedia2.1	-				chr14	45380960	45381319	-	intergenic					TTTCCAAGTGCTGCATCCTCCCAAACACAACATGAACTCAACACTTAATAAAGCTGCAGT
CUST_44625_PI429285431	0.000185185	0.248137	lncRNA		CUST_44625_PI429285431	CUST_44625_PI429285431	FALSE	lncRNA	"gi|224465144|ref|NR_027111.1| Homo sapiens uncharacterized LOC285629 (LOC285629), non-coding RNA"		ncbi	-				Chr5	160358785	160361123	-	intergenic					GCCAAAGAAAGCTTCAGTCAATGCATAGTCTCCCTTTAATAAACCTTGTGGTAGAAAAAA
CUST_840_PI429285431	2.38e-06	0.443011	lncRNA		CUST_840_PI429285431	CUST_840_PI429285431	FALSE	lncRNA	"transcript_id ""ENST00000565283.1"" | genecode_v17"		gencode_v17	-				chr2	36581892	36582257	-	intergenic					TGAATTTTAACTGTCCTCATTCTGGGTTTTGTCGCTCTGCTTTCTGTGCCAAGGTGCTGT
CUST_45322_PI429285431	2.29e-09	2.71313	lncRNA		CUST_45322_PI429285431	CUST_45322_PI429285431	FALSE	lncRNA	"gi|410170569|ref|XR_158845.2| PREDICTED: Homo sapiens uncharacterized protein PRO2852 (PRO2852), misc_RNA"		ncbi	-				Chr9	34186028	34187942	+	intergenic					TTCCTTGGACTTGTGTGTCTCCTATCTACCATTAAACCCTTATGACTTAAGGTATATGTA
CUST_37203_PI429285431	9.43e-07	0.465182	lncRNA		CUST_37222_PI429285431	CUST_37222_PI429285431	FALSE	lncRNA	n345657|NULL|lincRNA|Homosapiens|HumanlincRNA|ScriptureReconstructionLincRNAsByLuo[unpublished]|linc_luo_1206|NULL|-1.3139200|-0.3620414		NONCODERv3	-				chr4	183802680	183803456	+	intergenic					GAACCTGTTTTTATTTTGTTTGGTTTTAAACACAAAGAGCCCGTGCTGGCTGCTGGCTCG
CUST_51268_PI429285431	5.35e-09	0.492819	lncRNA		CUST_51268_PI429285431	CUST_51268_PI429285431	FALSE	lncRNA	hg19_lincRNAsTranscripts_TCONS_l2_00008492 range=chr15:28992868-29004385 5'pad=0 3'pad=0 strand=+ repeatMasking=none		UCSC	-				chr15	28995868	28997748	+	intergenic					AGACTGTATGACAAATCCACTGCCTTTCTTCTTTTGCAGCAGGGCCTTTCTTTTTAATGA
LNCA_21_P0002106	8.81e-05	0.155703	lncRNA	XLOC_002335	LNCA_21_P0004569	LNCA_21_P0004569	FALSE	lncRNA	XR_108596	XR_108596	Agilent_HUMAN_G3V2	-	LOC100505994	uncharacterized LOC100505994		chr5	90609921	90609980	-	intergenic					TATTTCTGACTTGGCTTTCTTGTATTTCTCTCACGTTAACAAAATTGGTTCAGCATCTAC
LNCA_21_P0010023	7.57e-09	0.435599	lncRNA	XLOC_013694	LNCA_21_P0014147	LNCA_21_P0014147	FALSE	lncRNA	XR_108598	XR_108598	Agilent_HUMAN_G3V2	-	LOC100287592	uncharacterized LOC100287592		chr5	50265051	50265110	-	intergenic					GCCGCGTTCAATCCGAGTCCCTCCGATGCTTTCACTGATATTAAAATTTCACTTTTCGAA
CUST_2431_PI429285431	0.000161166	0.232594	lncRNA		CUST_24356_PI429285431	CUST_24356_PI429285431	FALSE	lncRNA	lnc-IRF1-2:1		lncipedia2.1	-				chr5	131761974	131762740	-	intergenic					GATATCAAGAAGTCAAGCATTTCTTAACAACAGCAGCAAACTCTTACACAGGGCTGTGGT
CUST_8337_PI429285431	0.000194963	0.195788	lncRNA		CUST_8337_PI429285431	CUST_8337_PI429285431	FALSE	lncRNA	lnc-RP1L1-5:1		lncipedia2.1	-				chr8	9762669	9763384	-	intergenic					ACGCACACGCGCCGCTTTTTATTTCTTTTTCCTGGTTTTCTTATTCCATCTTCTACCCAC
LNCA_21_P0008104	5.6e-06	0.300846	lncRNA	XLOC_010471	LNCA_21_P0011446	LNCA_21_P0011446	FALSE	lncRNA			Agilent_HUMAN_G3V2	-	XLOC_l2_005294			chr16	74877049	74877108	+	intergenic					AGCAACCGGTTTGTGCTCCCCAACTCTGTCACACCCCCTTACTGACATTTGCACGGGTGA
CUST_237_PI429201921	1.05e-08	0.391952	lncRNA		CUST_23701_PI429285431	CUST_23701_PI429285431	FALSE	lncRNA	lnc-FURIN-1:2		lncipedia2.1	-				chr15	91384384	91384785	+	intergenic					CTATCGTCCTTCTAAAAGACACTTCAAAAAGAGGCAAAATCATGCCTTCCATACATATAT
CUST_9824_PI429285431	6.21e-06	0.465269	lncRNA		CUST_9824_PI429285431	CUST_9824_PI429285431	FALSE	lncRNA	lnc-LMX1A-1:1		lncipedia2.1	-				chr1	164881513	164881841	-	intergenic					AAGATTCAGTCCAAGCCTATGGGCTCAGCCCTTTGTTTCCCAGAGCCTCAGCCTCCATGC
CUST_33535_PI429285431	2.54e-06	3.02226	lncRNA		CUST_33542_PI429285431	CUST_33542_PI429285431	FALSE	lncRNA	n340291|AF075048|mRNAlikelncRNA|Homosapiens|HumanlncRNA|JounralRNA|2752|NULL|-0.9300800|-0.1770674		NONCODERv3	-				chr4	185377247	185377761	-	intronic_sense	IRF2	-	3660	interferon regulatory factor 2	TTGAAGTGCAGAGTCACATTTTTGTGAGGCGAATGAACTAATGGGGGTGAGTCTGATGCA
CUST_11438_PI429285431	7.5e-05	2.83843	lncRNA		CUST_11453_PI429285431	CUST_11453_PI429285431	FALSE	lncRNA	lnc-RP11-1220K2.2.1-1:2		lncipedia2.1	-				chr7	141922670	141923709	+	intergenic					ACCCATGGTCATTACCAAATCTGGTCATTTGGGTACTATTGTAGGTTTAACCCTAGGGCA
CUST_18656_PI429285431	6.37e-07	0.362533	lncRNA		CUST_18672_PI429285431	CUST_18672_PI429285431	FALSE	lncRNA_mRNA	lnc-C17orf103-1:1		lncipedia2.1	gi|116325984|ref|NM_152914.2|				chr17	21159472	21161396	-	intergenic					AGCCTTAAAAGCAATAAACAGATACAACTTCCAGCAACTTCCCACTCAGCTGCAAGGCTG
LNCA_21_P0006253	5.94e-09	0.388096	lncRNA	XLOC_007645	LNCA_21_P0009990	LNCA_21_P0009990	FALSE	lncRNA			Agilent_HUMAN_G3V2	-	XLOC_013608			chr20	61750484	61750543	+	intergenic					AATCTTCGTGTCAGCTCCTCCCTGGCAGACTTAGCCTGCCAGAGCTAATGAGACAGGCCA
CUST_41446_PI429285431	3.74e-05	0.444758	lncRNA		CUST_41446_PI429285431	CUST_41446_PI429285431	FALSE	lncRNA	ENST00000385091 ncrna:miRNA chromosome:GRCh37:8:1765397:1765473:1 gene:ENSG00000207826 gene_biotype:miRNA transcript_biotype:miRNA		ensembl.GRCh37.72	-				chr8	1765397	1765473	+	intergenic					GCCTGCCCGGCTCCTCGGGAACCTGCCTCCCGCATGGCAGCTGCTGCCCTTCGGAGGCCG
CUST_33456_PI429285431	1.39e-07	2.84066	lncRNA		CUST_33466_PI429285431	CUST_33466_PI429285431	FALSE	lncRNA	n340201|BC062457|mRNAlikelncRNA|Homosapiens|HumanlncRNA|JounralRNA|2662|NULL|-1.2342900|-0.3509294		NONCODERv3	-				chr4	113242859	113243851	+	intronic_sense	ALPK1	+	80216	alpha-kinase 1	ATGCACAGGATTAATCAACAAGATAGGTTACCCAGATTTAGCTTGCATCTGCTTTTATAA
CUST_28976_PI429285431	5.24e-08	3.24841	lncRNA		CUST_28976_PI429285431	CUST_28976_PI429285431	FALSE	lncRNA	n326457|NULL|mRNAlikelncRNA|Homosapiens|vegalncRNA|GENCODE|OTTHUMT00000036739|http://vega.sanger.ac.uk/Homo_sapiens/Transcript/Summary?db=core;t=OTTHUMT00000036739|2.7430600|-0.3297327		NONCODERv3	-				chr1	120843136	120843797	+	intronic_sense	FAM72B	+	653820	"family with sequence similarity 72, member B"	ATCAACCACCTAACCCCAAAGGCTCTTTTCAGAGCCACTTCAGTAATTGAGAAAGCAGCT
CUST_14984_PI429285431	5.67e-07	0.345079	lncRNA		CUST_14997_PI429285431	CUST_14997_PI429285431	FALSE	lncRNA	lnc-FAM22E-2:1		lncipedia2.1	-				chr10	81682418	81683841	+	intergenic					CTTGCCTCCCTGCTGAACTCTCTGCTGCTTTGGAAGAGAATTCAATGTTGGTTTTCTTCT
CUST_36852_PI429285431	1.36e-07	0.445476	lncRNA		CUST_36852_PI429285431	CUST_36852_PI429285431	FALSE	lncRNA	n345322|NULL|lincRNA|Homosapiens|HumanlincRNA|ScriptureReconstructionLincRNAsByLuo[unpublished]|linc_luo_871|NULL|-1.4390300|-0.1893230		NONCODERv3	-				chr16	85207652	85210651	+	intergenic					TTCAATTGCACAAATTTTTGCCGGATTCTTCACTCCAGTCTTCCCTCTTGACAGAGCTTC
CUST_14698_PI429285431	0.000304455	0.441231	lncRNA		CUST_14698_PI429285431	CUST_14698_PI429285431	FALSE	lncRNA	lnc-HNF1A-1:4		lncipedia2.1	-				chr12	121345458	121345998	+	intergenic					AAGTCTCCCCAGAGGGCAAGGTTGGAATAAATCTGAAGCCTGTGGCTTGCCTGGGAGCTG
CUST_43164_PI429285431	1.64e-06	2.90246	lncRNA		CUST_43164_PI429285431	CUST_43164_PI429285431	FALSE	lncRNA	ENST00000591237 havana:sense_intronic chromosome:GRCh37:17:40661802:40663537:1 gene:ENSG00000267632 gene_biotype:sense_intronic transcript_biotype:sense_intronic		ensembl.GRCh37.72	-				chr17	40661802	40663537	+	intronic_sense	ATP6V0A1	+	535	"ATPase, H+ transporting, lysosomal V0 subunit a1 (EC:3.6.3.14)"	GAAAGATGCAAGGGCTGAAGCTGAAACTTCAGAGAGCATCGGCATTTAAGGAAGAACCTT
LNCA_23_P116435	4.05e-05	0.325514	lncRNA	IGF2-AS
CUST_23772_PI429285431	2.97e-12	0.411259	lncRNA		CUST_237_PI429201921	CUST_237_PI429201921	FALSE	lncRNA	TC22000970.hg.1		Affy_HUMAN_HTA2.0	-				chr22	20186295	20192440	+	intergenic					CAATGGTTTAAGTTATTTTCTGTCAGCATCAACTTATTCCCCAGCCCATATCCGCAGGCC
CUST_22725_PI429285431	5.7e-05	0.379213	lncRNA		CUST_22725_PI429285431	CUST_22725_PI429285431	FALSE	lncRNA	lnc-AC007557.1.1-3:1		lncipedia2.1	-				chr2	217858681	217859232	+	intergenic					AACGCCTCCTGCTCCATCACAGTGACTGCTCAAGGCAGGACACCTGATCCTATCGGAATC
CUST_49994_PI429285431	1.24e-05	0.488588	lncRNA		CUST_49_PI429285431	CUST_49_PI429285431	FALSE	lncRNA	"transcript_id ""ENST00000531585.1"" | genecode_v17"		gencode_v17	-				chr11	126862348	126862809	+	intronic_antisense	KIRREL3	-	84623	kin of IRRE like 3 (Drosophila)	TGTGCATTCCAGCATGCTCATGATCTTACTGACCTTCTCCACTGATGAATTAGAACACCC
CUST_38291_PI429285431	9.56e-09	2.64832	lncRNA		CUST_38291_PI429285431	CUST_38291_PI429285431	FALSE	lncRNA	n381941|NULL|lncRNA|Homosapiens||UCSCGeneNoncode|uc001tya.2||2.4245100|-0.2171557		NONCODERv3	-				chr12	120655866	120657919	-	intronic_sense	PXN	-	5829	paxillin	CTTGCCTTGTTGAGGCTTTTTCCTTTCAGATGAGCTGTCCTTGACATTCTGATGTGGTGA
CUST_5404_PI429285431	2.7e-09	2.40363	lncRNA		CUST_5404_PI429285431	CUST_5404_PI429285431	FALSE	lncRNA	"transcript_id ""ENST00000565111.1"" | genecode_v17"		gencode_v17	-				chr16	2694085	2694656	-	intergenic					ATTGGGTCCATAGCGTAGGTAAGTCACCTCCTTTAAGAGACTTTGATAAGCAAAATAGTG
CUST_38753_PI429285431	2.98e-06	2.11519	lncRNA		CUST_38753_PI429285431	CUST_38753_PI429285431	FALSE	lncRNA	n384319|NULL|lncRNA|Homosapiens||UCSCGeneNoncode|uc003emb.2||1.0124300|-0.2577402		NONCODERv3	-				chr3	129101677	129103958	-	intergenic					CAATTCTCAGGGAGTGTTTTGGTGATACAGGCTGGGGAGTTAAATAAATGAACGAATAAA
CUST_50000_PI429285431	3.77e-06	0.438955	lncRNA		CUST_50000_PI429285431	CUST_50000_PI429285431	FALSE	lncRNA	hg19_lincRNAsTranscripts_TCONS_l2_00027551 range=chr8:846693-982857 5'pad=0 3'pad=0 strand=+ repeatMasking=none		UCSC	-				chr8	846693	847100	+	intergenic					TACTGAGAGCAGAGAAAGAGCTCTTTGTAGAAATGAGATGTGTTCCTGTGTGCTGCCTGT
LNCA_21_P0005378	1.09e-06	0.413081	lncRNA	XLOC_006091	LNCA_21_P0008846	LNCA_21_P0008846	FALSE	lncRNA			Agilent_HUMAN_G3V2	-	XLOC_011451			chr15	41901712	41901771	-	intergenic					TGCCCCCCAAAATATATATATAGTTTTTGCCCTCATGTCTCTTATTGGGATGACAGACAT
CUST_8371_PI429285431	8.15e-08	2.66518	lncRNA		CUST_8371_PI429285431	CUST_8371_PI429285431	FALSE	lncRNA	lnc-TMEM60-1:5		lncipedia2.1	-				chr7	77325213	77326114	-	exonic_antisense	RSBN1L	+	222194	round spermatid basic protein 1-like	GCCGGTATCACAGCTTTTCTTCAAAACAGGTAATATTAGGGACACTTGAAATTTGGGAAT
CUST_44977_PI429285431	0.00030807	2.01292	lncRNA		CUST_44977_PI429285431	CUST_44977_PI429285431	FALSE	lncRNA	"gi|114687641|ref|NR_003186.1| Homo sapiens neutrophil cytosolic factor 1B pseudogene (NCF1B), non-coding RNA"		ncbi	-				NW_003871064.1	749875	751426	+						TTGTCCAGTGTGGTGAAGGTGACATTTCCAAATCTGAGCATTGGACATCAGTGTGTCTGT
LNCA_21_P0008882	5.75e-05	0.413959	lncRNA	LOC100507534	LNCA_21_P0012387	LNCA_21_P0012387	FALSE	lncRNA			Agilent_HUMAN_G3V2	-	XLOC_l2_009811			chr3	107151962	107152021	+	intergenic					AGATTCAGAGAGGCTGTTCCTGGTTTCTTGGCTAAGGTCCTTTCTACTATCCAGACTACA
CUST_29517_PI429285431	4.65e-07	2.43301	lncRNA		CUST_29517_PI429285431	CUST_29517_PI429285431	FALSE	lncRNA	n332961|AF092843|mRNAlikelncRNA|Homosapiens|NULL|H-invitationalv7.5|HIT000068370|http://h-invitational.jp/hinv/spsoup/transcript_view?hit_id=HIT000068370|1.0075100|-0.3012914		NONCODERv3	-				chr12	69202244	69202626	+	exonic_sense	MDM2	+	4193	Mdm2 p53 binding protein homolog (mouse)	ATATACCATGATCTACAGGAACTTGGTAGTAGTCAATCAGCAGGGTAAGTTAATTTTGAG
CUST_38005_PI429285431	4.16e-11	5.41552	lncRNA		CUST_38005_PI429285431	CUST_38005_PI429285431	FALSE	lncRNA	n377578|NULL|lncRNA|Homosapiens|HumanlincRNA|BodyMapLinc|TCONS_00029941||-0.3805280|-0.4552886		NONCODERv3	-				chr6	130802	133586	-	intergenic					GCTTTCTTACAAGGCCACATTCTATCTTGTAACTAAACAACTGAATTTTATGTCTTAGCG
CUST_26385_PI429285431	7.75e-05	2.4553	lncRNA		CUST_263_PI429285431	CUST_263_PI429285431	FALSE	lncRNA	"transcript_id ""ENST00000427547.1"" | genecode_v17"		gencode_v17	-				chr1	63543752	63543908	-	intergenic					AAGGTCATTTACTGCAAACCACTATCTCCCAGCTAATCTGGCTTCTGCTCCTGATTTTCT
CUST_38154_PI429285431	8.48e-07	3.15524	lncRNA		CUST_38154_PI429285431	CUST_38154_PI429285431	FALSE	lncRNA	n381375|NULL|lncRNA|Homosapiens||UCSCGeneNoncode|uc001hzq.1||1.6402700|-0.1785249		NONCODERv3	-				chr1	243219611	243222610	-	intergenic					ATAATAGTGCATGCATCAAGTGCAATGGGAAGCTCTTCTGGAGAGTGAGAGAAGCTTCCA
CUST_28085_PI429285431	2.96e-09	0.47367	lncRNA		CUST_28085_PI429285431	CUST_28085_PI429285431	FALSE	lncRNA	n325356|NULL|mRNAlikelncRNA|Homosapiens|vegalncRNA|GENCODE|OTTHUMT00000324765|http://vega.sanger.ac.uk/Homo_sapiens/Transcript/Summary?db=core;t=OTTHUMT00000324765|-1.2375200|-0.2520152		NONCODERv3	-				chr2	30000853	30001657	+	intronic_antisense	ALK	-	238	anaplastic lymphoma receptor tyrosine kinase (EC:2.7.10.1)	TCACTACAGACCCATAAAGAGCAAACTCAGTAAGTGTCAACCTGTCTCCTAACAAAAGCC
LNCA_19_P00331839	1.23e-05	0.462274	lncRNA	LOC100132356	LNCA_21_P0000570	LNCA_21_P0000570	FALSE	lncRNA	NR_028483	NR_028483	Agilent_HUMAN_G3V2	-	C22orf45	chromosome 22 open reading frame 45		chr22	24834245	24834302	-	intronic_antisense	ADORA2A	+	135	adenosine A2a receptor	AGAAAAGCATATCCCTTCCTGGGTTCTGGCCCTGTTAACAGGAATGTTTTAAAACTTTAA
LNCA_33_P3682006	0.00448362	0.459777	lncRNA
CUST_39648_PI429285431	5.99e-08	0.451003	lncRNA		CUST_39648_PI429285431	CUST_39648_PI429285431	FALSE	lncRNA	n405224|NULL|lncRNA|Homosapiens||GENCODE|OTTHUMT00000322483||-0.9741330|-0.4074552		NONCODERv3	-				chr7	93608	94098	-	intergenic					CTGAGTGTGAATTTCGGTGCCTGTTGCTCCTTTACTATAAATCAACCTTGTGTTTTAAGG
CUST_50861_PI429285431	3.13e-08	3.04389	lncRNA		CUST_50862_PI429285431	CUST_50862_PI429285431	FALSE	lncRNA	hg19_lincRNAsTranscripts_TCONS_l2_00005178 range=chr11:104776171-104777801 5'pad=0 3'pad=0 strand=- repeatMasking=none		UCSC	-				chr11	104776171	104776382	-	intergenic					GACTTCATTGTTTTCTGCTCTTCAACCTCATATAACGTGTCCAGGAGAGACAGCACAAGG
CUST_6622_PI429285431	1.78e-05	0.49768	lncRNA		CUST_6622_PI429285431	CUST_6622_PI429285431	FALSE	lncRNA	"transcript_id ""ENST00000595059.1"" | genecode_v17"		gencode_v17	-				chr19	58951815	58954814	+	bidirectional	ZNF132	-	7691	zinc finger protein 132	TCACTGCTACTTATCCCTGGCTGCTGCATAAACAACCCCCACACCTTCCCTGGGATCTTG
CUST_21088_PI429285431	1.57e-05	0.369127	lncRNA		CUST_21088_PI429285431	CUST_21088_PI429285431	FALSE	lncRNA	lnc-SCN8A-2:1		lncipedia2.1	-				chr12	52216024	52218321	+	exonic_antisense	FIGNL2	-	401720	fidgetin-like 2	CATTTCTGGGATCTCCCCTCAAAAACAAACAAAAAATTCCCCTTCTTTGGGGACTTTTTT
LNCA_33_P3283601	0.00183978	0.483113	lncRNA	LOC389033
CUST_17110_PI429285431	1.73e-07	0.424068	lncRNA		CUST_17117_PI429285431	CUST_17117_PI429285431	FALSE	lncRNA	lnc-BPHL-2:3		lncipedia2.1	-				chr6	3257557	3258521	+	intergenic					CTTTTCTCAACTCTGTAATGTCCTGAAGTGTTCAAGGGGTCTCCCCATAGGTATGACAAT
CUST_49645_PI429285431	1.13e-06	3.06888	lncRNA		CUST_49659_PI429285431	CUST_49659_PI429285431	FALSE	lncRNA	hg19_lincRNAsTranscripts_TCONS_l2_00026191 range=chr7:128171398-128266588 5'pad=0 3'pad=0 strand=+ repeatMasking=none		UCSC	-				chr7	128171398	128172773	+	intergenic					GCTGGAATATAGAAAATGGATGGACAAGTAAATCCCACTCAGCACCCATAGTCCAGGCAT
CUST_48473_PI429285431	6.17e-07	3.02454	lncRNA		CUST_48473_PI429285431	CUST_48473_PI429285431	FALSE	lncRNA	hg19_lincRNAsTranscripts_TCONS_l2_00001812 range=chr1:224161743-224174336 5'pad=0 3'pad=0 strand=- repeatMasking=none		UCSC	-				chr1	224161743	224162772	-	intergenic					GCTGGAATATAGAAAATGGATGGACAAGTAAATCCCACTCAGCACCCATAGTCCAGGCAT
CUST_10504_PI429285431	8.04e-08	0.493416	lncRNA		CUST_10509_PI429285431	CUST_10509_PI429285431	FALSE	lncRNA	lnc-KLF3-2:1		lncipedia2.1	-				chr4	38753053	38755217	+	intergenic					CTGGAAAAAGAATTCCCTATCTCCCAAGAACTCTCCCTTTCATTCTTGTAATTCCTTTTT
CUST_40144_PI429285431	3.66e-07	0.459555	lncRNA		CUST_40144_PI429285431	CUST_40144_PI429285431	FALSE	lncRNA	n407766|NR_027287|lncRNA|Homosapiens||RefGeneNoncode|NR_027287||0.1748390|-0.0990199		NONCODERv3	-				chr20	62584736	62587735	+	exonic_antisense	UCKL1	-	54963	uridine-cytidine kinase 1-like 1 (EC:2.7.1.48)	TTAGACTCCAGCCATGCAAAGTTCCTAGTCACTGCCCACTGGGAGGGTGTGGACCTGAAG
CUST_7417_PI429285431	5.99e-12	2.85294	lncRNA		CUST_7417_PI429285431	CUST_7417_PI429285431	FALSE	lncRNA	lnc-FAM49B-1:1		lncipedia2.1	-				chr8	131239735	131241918	-	intronic_sense	ASAP1	-	50807	"ArfGAP with SH3 domain, ankyrin repeat and PH domain 1"	GAGAGGGGTGTGTAAAATGAAGACATCTGTGTATATTGTTAATTGGGAAAAACAGTTTAC
CUST_50330_PI429285431	1.03e-06	3.12043	lncRNA		CUST_50330_PI429285431	CUST_50330_PI429285431	FALSE	lncRNA	hg19_lincRNAsTranscripts_TCONS_l2_00029059 range=chr9:132096183-132109733 5'pad=0 3'pad=0 strand=+ repeatMasking=none		UCSC	-				chr9	132096183	132097041	+	intergenic					CATCATCAGTCCCCCGGATGGGTGTTTAAGGCATTTCCAAAGCTCTGTTATTAAAAACAC
CUST_8137_PI429285431	3.24e-09	0.454333	lncRNA		CUST_8137_PI429285431	CUST_8137_PI429285431	FALSE	lncRNA	lnc-KIAA1147-2:1		lncipedia2.1	-				chr7	141437998	141439721	-	exonic_antisense	SSBP1	+	6742	single-stranded DNA binding protein 1	TTATTTTAATCACCAGTGTATGTTCTCCTGCTCCCTGGACAAATCCATCAGCAGCGGCAA
LNCA_21_P0004290	4.2e-07	0.430043	lncRNA	XLOC_004536	LNCA_21_P0007309	LNCA_21_P0007309	FALSE	lncRNA			Agilent_HUMAN_G3V2	-	XLOC_009345			chr11	134585793	134585852	+	intergenic					GTAAAATAAATACAAACAAAATAAGCAATAATCTACCCCCTTCCTTTCTCCTCTGGTCCC
CUST_11953_PI429285431	2.35e-05	0.3406	lncRNA		CUST_11_PI429285431	CUST_11_PI429285431	FALSE	lncRNA	"transcript_id ""ENST00000457364.2"" | genecode_v17"		gencode_v17	-				chr5	180751371	180754031	+	intergenic					CGGCAGCCTCTTGGCCTCTAATTTGTTTATCTTTTGTGTATAAATCCCAAAATATTGAAT
CUST_25125_PI429285431	6.88e-07	0.373778	lncRNA		CUST_25125_PI429285431	CUST_25125_PI429285431	FALSE	lncRNA	lnc-CNBD1-2:1		lncipedia2.1	-				chr8	87777021	87777824	+	intergenic					CTTACATGAAGGTATAGAGGTAGGCTCATCACTTTTACCCAAACTCAAAAAACTGAATTT
CUST_40653_PI429285431	1.44e-05	0.435287	lncRNA		CUST_40653_PI429285431	CUST_40653_PI429285431	FALSE	lncRNA	n410198|NR_037142|lncRNA|Homosapiens||RefGeneNoncode|NR_037142||3.2916100|-0.1422230		NONCODERv3	-				chr20	1754010	1754756	-	intergenic					GGCTTAAAAACAAACACGAGCTCCCAAACCCCCAGACCAGCGTCCAGTACAGTGGACACA
CUST_19239_PI429285431	4.27e-06	0.246171	lncRNA		CUST_19239_PI429285431	CUST_19239_PI429285431	FALSE	lncRNA	lnc-C5orf51-1:1		lncipedia2.1	-				chr5	41870868	41871314	+	bidirectional	OXCT1	-	5019	3-oxoacid CoA transferase 1 (EC:2.8.3.5)	CTTCTCCCCACATCTGGCCTTGGCTTACATAGAGTAAGTTTGCTGTGAGCACTTGCCTCG
CUST_48190_PI429285431	2.38e-08	2.23496	lncRNA		CUST_48190_PI429285431	CUST_48190_PI429285431	FALSE	lncRNA	"gi|341915002|ref|XR_133567.1| PREDICTED: Homo sapiens TMLHE antisense RNA 1 (TMLHE-AS1), misc_RNA"		ncbi	-													ATCCACCATGTGGTTCTTTGAGTTCTCGGTTTCTTTTCTGAGCTCAGTAATCTCCTTTTT
CUST_15564_PI429285431	2.95e-08	0.447004	lncRNA		CUST_15564_PI429285431	CUST_15564_PI429285431	FALSE	lncRNA	lnc-ARFGEF2-2:4		lncipedia2.1	-				chr20	47104047	47107046	+	intergenic					TGTTAAACTAGAACAGCAGCACTGATTTCTCACCAGGTCTCCAGCTCCACGACCCTCACA
CUST_35295_PI429285431	0.00011056	2.03508	lncRNA		CUST_35298_PI429285431	CUST_35298_PI429285431	FALSE	lncRNA	n342320|X02067|mRNAlikelncRNA|Homosapiens|HumanlncRNA|JounralRNA|4812|NULL|-1.3833300|-0.3135110		NONCODERv3	-				chr14	50329253	50329629	-	intergenic					CGCTCCCCAATGACGTAACTGCCCTGCAGCTTCTAGTAGCTTTTCGCAGCGTCTCCGACC
CUST_16800_PI429285431	0.0475458	0.316504	lncRNA		CUST_16812_PI429285431	CUST_16812_PI429285431	FALSE	lncRNA	lnc-DMRT2-1:2		lncipedia2.1	-				chr9	1047151	1049166	+	intergenic					AATTTAAAAAAGCAAACCCATGGCGAGTCTTTCTTGCTGGGAGTGAGGGGCTCTGCAAAA
CUST_30691_PI429285431	3.34e-09	0.442827	lncRNA		CUST_30709_PI429285431	CUST_30709_PI429285431	FALSE	lncRNA_mRNA	n336220|X97053|mRNAlikelncRNA|Homosapiens|NULL|H-invitationalv7.5|HIT000324966|http://h-invitational.jp/hinv/spsoup/transcript_view?hit_id=HIT000324966|1.1166100|-0.0125794		NONCODERv3	"ENST00000527096,ENST00000436759,ENST00000356346,ENST00000354958,ENST00000322810,ENST00000398774,ENST00000354589,ENST00000357649,ENST00000345136"				chr8	144997131	144998827	+	exonic_antisense	PLEC	-			CTCCTCAGCCCTCGCCTTGCTGGCCAGCAGCACCTCCATCTCGGCCCGCACCTTGGCCAG
LNCA_21_P0012137	3.43e-07	0.470734	lncRNA	LOC339593	LNCA_33_P3289745	LNCA_33_P3289745	FALSE	lncRNA_mRNA	XR_111182	XR_111182	Agilent_HUMAN_G3V2	ENST00000601917	LOC399900	uncharacterized LOC399900		chr11	61736625	61736684	+	intergenic					AAATGTGGAAATGCATGGCCTGTTAAAGCTGCCTTAAGAAAATATGTTGCCTGGGGCTGG
CUST_34669_PI429285431	2.29e-08	2.82597	lncRNA		CUST_34669_PI429285431	CUST_34669_PI429285431	FALSE	lncRNA	n341573|BC014866|mRNAlikelncRNA|Homosapiens|HumanlncRNA|JounralRNA|4044|NULL|-0.8604940|-0.4589720		NONCODERv3	-				chr8	103268619	103270062	+	exonic_antisense	UBR5	-	51366	ubiquitin protein ligase E3 component n-recognin 5	CGCTTGAACTGCAGAAGCTTCTCAGCATTTTCTCCTAAGAATGAAGAATGTAAATAAAAT
CUST_9060_PI429285431	4.03e-07	0.42339	lncRNA		CUST_9060_PI429285431	CUST_9060_PI429285431	FALSE	lncRNA	lnc-WDR54-1:3		lncipedia2.1	-				chr2	74618605	74619370	+	exonic_antisense	DCTN1	-	1639	"dynactin 1 (p150, glued homolog, Drosophila)"	ATGGGTTTGCTGCTCTCCTCACTGCAATAAATGACGGAAACCTGTAGCTCAGTATGGATT
LNCA_21_P0003556	5.1e-05	0.45534	lncRNA	XLOC_003411	LNCA_21_P0006384	LNCA_21_P0006384	FALSE	lncRNA			Agilent_HUMAN_G3V2	-	XLOC_007770			chr9	93263708	93263767	-	intergenic					CAACAGACAGTGGCTTCTCCTTCCCTAAATTGCCCTTATTTTGTAGTAAGTTATAATATG
LNCA_19_P00321682	3.74e-07	0.486353	lncRNA	LOC286149	LNCA_19_P00330507	LNCA_19_P00330507	FALSE	lncRNA			Agilent_HUMAN_G3V2	-	XLOC_000294			chr1	93804415	93804474	+	intergenic					GAACCTTAACTACTACACTTCCCCAAATAGCCTTCTCTCATGTTATTCCTTTATGTGTTC
CUST_14380_PI429285431	1.26e-05	0.464346	lncRNA		CUST_14380_PI429285431	CUST_14380_PI429285431	FALSE	lncRNA	lnc-C17orf101-1:1		lncipedia2.1	-				chr17	80341395	80341871	-	intergenic					TTTGGCAGAAAGGACTTTTGCTGAAATCCCCAGCGGGGCACTCGACCCCTCTAGTGGGTT
CUST_6284_PI429285431	7.71e-08	0.415292	lncRNA		CUST_62_PI429201921	CUST_62_PI429201921	FALSE	lncRNA	TC04002689.hg.1		Affy_HUMAN_HTA2.0	-				chr4	120314432	120316288	-	intergenic					GTCCAAGTTTCTCACATGTTTTCGCTATACACTCATAGACAGAATGTAGAATTTCCTTAG
CUST_33071_PI429285431	0.000104118	0.380327	lncRNA		CUST_33082_PI429285431	CUST_33082_PI429285431	FALSE	lncRNA	n339770|BC039412|mRNAlikelncRNA|Homosapiens|HumanlncRNA|JounralRNA|2217|NULL|-0.7824040|-0.0497568		NONCODERv3	-				chr4	655334	656386	-	exonic_antisense	PDE6B	+	5158	"phosphodiesterase 6B, cGMP-specific, rod, beta (EC:3.1.4.35)"	GGCTCTTCCTGCGGCCATTGTGATTTTTAGGGTCAGAAAATTATTTGGAAATATTTTTTA
CUST_36820_PI429285431	0.000124017	0.169469	lncRNA		CUST_36820_PI429285431	CUST_36820_PI429285431	FALSE	lncRNA	n345297|NULL|lincRNA|Homosapiens|HumanlincRNA|ScriptureReconstructionLincRNAsByLuo[unpublished]|linc_luo_846|NULL|-1.4826700|-0.2689157		NONCODERv3	-				chr15	82033988	82035761	-	intergenic					TCTCCTGAAGATACAAAGTCTCCCCAGATAACACTGACACATGAGCAGTACTTCCAACAG
CUST_9581_PI429285431	9.83e-07	0.434477	lncRNA		CUST_9581_PI429285431	CUST_9581_PI429285431	FALSE	lncRNA	lnc-C10orf137-1:3		lncipedia2.1	-				chr10	127389030	127389474	+	intergenic					ACGACCTCTCTTTGTATTCATGATTTTCAACAGGTCTCCTGGTTCTTCTAGCCCCTCTAA
CUST_17249_PI429285431	1.11e-05	0.472242	lncRNA		CUST_17249_PI429285431	CUST_17249_PI429285431	FALSE	lncRNA	lnc-ATP6V1E2-2:1		lncipedia2.1	-				chr2	46523305	46524074	-	bidirectional	EPAS1	+	2034	endothelial PAS domain protein 1	GCCACATGCCTTATCTCACGTAATACCCATCTGACCCTTGTCTGGCTATTTAGTTGGTTT
CUST_45911_PI429285431	0.000243179	0.392306	lncRNA		CUST_45911_PI429285431	CUST_45911_PI429285431	FALSE	lncRNA	"gi|223278395|ref|NR_003040.2| Homo sapiens ribosomal protein L23a pseudogene 64 (RPL23AP64), non-coding RNA"		ncbi	-				NW_003871076.1	24553	25193	-						GGGATCATCTCAACTGAGTCCAGTTGGCTAATTCTAAATATATGTATATCTTTTCACCAT
CUST_6634_PI429285431	0.000406862	0.432443	lncRNA		CUST_6634_PI429285431	CUST_6634_PI429285431	FALSE	lncRNA	"transcript_id ""ENST00000445589.1"" | genecode_v17"		gencode_v17	-				chr20	6711905	6712836	-	intergenic					TTCTTCTTCCTCCCTTCTATTTGGCCTTGGAATACCCTGCAGACAAAGATGGACTTCCTT
CUST_27862_PI429285431	2.84e-07	0.484079	lncRNA		CUST_27862_PI429285431	CUST_27862_PI429285431	FALSE	lncRNA	n325098|NULL|mRNAlikelncRNA|Homosapiens|vegalncRNA|GENCODE|OTTHUMT00000328239|http://vega.sanger.ac.uk/Homo_sapiens/Transcript/Summary?db=core;t=OTTHUMT00000328239|-0.9151110|-0.2313746		NONCODERv3	-				chr2	239362038	239362629	-	intergenic					ATGGAAGAAGGCAGGGTGCTTTCTCCTTCCATTGCGTTGAAACTAGGTGCGCTGAGCCCT
CUST_42540_PI429285431	0.00356272	2.17215	lncRNA		CUST_42540_PI429285431	CUST_42540_PI429285431	FALSE	lncRNA	ENST00000516629 ncrna:snoRNA chromosome:GRCh37:10:12457927:12457999:1 gene:ENSG00000252438 gene_biotype:snoRNA transcript_biotype:snoRNA		ensembl.GRCh37.72	-				chr10	12457927	12457999	+	intronic_sense	CAMK1D	+	57118	calcium/calmodulin-dependent protein kinase ID (EC:2.7.11.17)	TATGTTCTGAATCTGAGGTTGATTATTATTCCTTTAGCGCTAGTATTACACTGAGACCTG
CUST_45531_PI429285431	3.99e-06	2.03653	lncRNA		CUST_45531_PI429285431	CUST_45531_PI429285431	FALSE	lncRNA	"gi|223468636|ref|NR_026793.1| Homo sapiens long intergenic non-protein coding RNA 264 (LINC00264), non-coding RNA"		ncbi	-				Chr10	26878794	26879910	+	intergenic					ATTTTATACCCGGTGAACCAGCCAACTTTCATGCAGTTGAGAAAAGTATAAGAAGCCAGC
CUST_43678_PI429285431	2.04e-05	2.77053	lncRNA		CUST_43678_PI429285431	CUST_43678_PI429285431	FALSE	lncRNA	"gi|315013530|ref|NR_037642.1| Homo sapiens uncharacterized LOC100527964 (LOC100527964), non-coding RNA"		ncbi	-				Chr1	180238798	180241470	-	intergenic					GGAGTGTCTGATGCAACTTTGAATTATGCAAATGGGAAATAGTGCACTTGTGTACAATCT
CUST_18993_PI429285431	1.62e-07	2.1259	lncRNA		CUST_18993_PI429285431	CUST_18993_PI429285431	FALSE	lncRNA	lnc-NOTCH2NL-1:2		lncipedia2.1	-				chr1	145100692	145101130	+	intronic_sense	SEC22B	+	9554	SEC22 vesicle trafficking protein homolog B (S. cerevisiae)	CGAACAGGTGGACTGGCTAACTGTGGGCCCTTTGTGACTTTGATCTTGAAAGCAAACTAA
CUST_50332_PI429285431	1.81e-06	2.93496	lncRNA		CUST_50332_PI429285431	CUST_50332_PI429285431	FALSE	lncRNA	hg19_lincRNAsTranscripts_TCONS_l2_00029063 range=chr9:132101991-132109755 5'pad=0 3'pad=0 strand=+ repeatMasking=none		UCSC	-				chr9	132101991	132104573	+	intergenic					TGTTTAAGGCATTTCCAAAGCTCTGTTATTAAAAACACGATGCAATGAGTTTCTTTCAGC
CUST_37333_PI429285431	1.44e-05	2.61152	lncRNA		CUST_3733_PI429285431	CUST_3733_PI429285431	FALSE	lncRNA	"transcript_id ""ENST00000530606.1"" | genecode_v17"		gencode_v17	-				chr10	77033055	77033603	+	intergenic					GCCCCTTCTTATATTAATGAATACTCGACTGTTATATTTGACTTAGGCTTCTCATCTGTA
CUST_2316_PI429285431	6.61e-09	0.483026	lncRNA		CUST_2316_PI429285431	CUST_2316_PI429285431	FALSE	lncRNA	"transcript_id ""ENST00000515822.1"" | genecode_v17"		gencode_v17	-				chr5	114423589	114424172	-	intergenic					AGTTGTTCCCAGGCTGTGGGGATATTCATCCTCTCCTTCACAGAATGTTCATTCTGGAAT
LNCA_19_P00317773	0.000812842	0.42883	lncRNA	IPW	LNCA_19_P00319099	LNCA_19_P00319099	FALSE	lncRNA			Agilent_HUMAN_G3V2	-	XLOC_007506			chr9	110102972	110103031	+	intergenic					TGTGCTCTGCCTAGAAACTCTCCCCTATTCCTCTCTCCTCAGTAGGCCAACGTTTAAAAC
CUST_31724_PI429285431	3.19e-08	2.39212	lncRNA		CUST_31724_PI429285431	CUST_31724_PI429285431	FALSE	lncRNA	n338257|BC061902|mRNAlikelncRNA|Homosapiens|HumanlncRNA|JounralRNA|650|NULL|-0.8458520|-0.1215080		NONCODERv3	-				chr19	1989901	1990420	+	exonic_antisense	BTBD2	-	55643	BTB (POZ) domain containing 2	ACCCACATGCCCACCCTGCAGGAGGCAGTGAGACTAACGTGAGGACCAGCAGTTAAAGCC
CUST_11487_PI429285431	6.13e-06	2.87922	lncRNA		CUST_11501_PI429285431	CUST_11501_PI429285431	FALSE	lncRNA	lnc-PPP1R3D-2:3		lncipedia2.1	-				chr20	58908937	58909587	-	intergenic					ACTGTAGATCCCTCCTGCCTGACTCAAGAGCCTCTGTCTATATGGAAGCAATCAACTTAA
CUST_37301_PI429285431	1.77e-06	2.5476	lncRNA		CUST_37302_PI429285431	CUST_37302_PI429285431	FALSE	lncRNA	n345745|NULL|lincRNA|Homosapiens|HumanlincRNA|ScriptureReconstructionLincRNAsByLuo[unpublished]|linc_luo_1294|NULL|-1.3244600|-0.3196945		NONCODERv3	-				chr7	75708817	75710560	-	intergenic					GTACTAGCTAACATTAACTGACCTTCTACCAGGTGCCTATAAATACCATAGATAGTTTAA
LNCA_21_P0002649	2.05e-05	0.434213	lncRNA	XLOC_002010	LNCA_21_P0005535	LNCA_21_P0005535	FALSE	lncRNA			Agilent_HUMAN_G3V2	-	XLOC_006625			chr7	141212552	141212611	-	intergenic					AATTTGATAACCCAACCATGCTGACCTCAAAGTGTAGTCAATCCATGAAGTTCCTCCCAC
CUST_48471_PI429285431	3.95e-06	2.29175	lncRNA		CUST_48471_PI429285431	CUST_48471_PI429285431	FALSE	lncRNA	hg19_lincRNAsTranscripts_TCONS_l2_00001808 range=chr1:224148835-224174312 5'pad=0 3'pad=0 strand=- repeatMasking=none		UCSC	-				chr1	224148835	224150055	-	intergenic					AAGAGAAACTGACTGGGCAACATGTTATTCAGGAAGTGAGCTCACAATGACTCAAGCTGC
CUST_50104_PI429285431	2.99e-05	0.49376	lncRNA		CUST_50104_PI429285431	CUST_50104_PI429285431	FALSE	lncRNA	hg19_lincRNAsTranscripts_TCONS_l2_00028605 range=chr9:3663780-3694788 5'pad=0 3'pad=0 strand=+ repeatMasking=none		UCSC	-				chr9	3669780	3672226	+	intergenic					AGTTTTGCCTTCAAGTAGTAAATAGTATAGGGACTCCTCCTACTCCGAACACACCTGTGT
CUST_10820_PI429285431	5.85e-05	2.5797	lncRNA		CUST_10820_PI429285431	CUST_10820_PI429285431	FALSE	lncRNA	lnc-TCF19-1:4		lncipedia2.1	-				chr6	31167732	31168740	+	intergenic					TCCCACTTTCTAGTCTCGGACCCAGTATTAAGGAATTCTGGTCACATAGTTTATTCATCC
CUST_20255_PI429285431	0.00226227	2.69457	lncRNA		CUST_20255_PI429285431	CUST_20255_PI429285431	FALSE	lncRNA	lnc-AC010536.1-1:1		lncipedia2.1	-				chr16	87781183	87781528	-	intronic_sense	KLHDC4	-	54758	kelch domain containing 4	TGCTGTCTGTGTCTGTGGATCTGCCTCTTCTGGGTATTTCATAAAAGCGGAATCAAAACA
CUST_38295_PI429285431	2.08e-09	2.30675	lncRNA		CUST_38295_PI429285431	CUST_38295_PI429285431	FALSE	lncRNA	n381958|NULL|lncRNA|Homosapiens||UCSCGeneNoncode|uc001uhw.2||-1.1402300|-0.2395714		NONCODERv3	-				chr12	129297748	129299294	-	intronic_sense	SLC15A4	-	121260	"solute carrier family 15, member 4"	TGGCATTCAGACACATAATTCAAAACTGCAAATGGTGGGACCGCACTAAAGAATTTTTAG
CUST_29231_PI429285431	4.08e-07	3.12541	lncRNA		CUST_29231_PI429285431	CUST_29231_PI429285431	FALSE	lncRNA	n326762|NULL|mRNAlikelncRNA|Homosapiens|vegalncRNA|GENCODE|OTTHUMT00000007168|http://vega.sanger.ac.uk/Homo_sapiens/Transcript/Summary?db=core;t=OTTHUMT00000007168|-1.1272400|-0.5028500		NONCODERv3	-				chr1	155751	156028	-	intergenic					AGGTGCATCCAGGAAGAGAAACTGACTGGGCAACATGTTATTCAGGTACAAAAAGACTTG
CUST_9034_PI429285431	5.68e-11	0.450175	lncRNA		CUST_9034_PI429285431	CUST_9034_PI429285431	FALSE	lncRNA	lnc-CCDC54-2:3		lncipedia2.1	-				chr3	107045313	107046461	+	intergenic					AATACTCTGAAAATACCGTGCTGGTCATTCCTGAGTCCCTGTTCTATGCCCTACAACATA
CUST_6018_PI429285431	4.83e-09	4.021	lncRNA		CUST_6018_PI429285431	CUST_6018_PI429285431	FALSE	lncRNA	"transcript_id ""ENST00000566986.1"" | genecode_v17"		gencode_v17	-				chr17	80251592	80252786	+	intergenic					CCGCCAAAACAGCGTGCATACCACTAGCATATGATTTTTGTAGTTTTTTAATGTTAAGTT
CUST_19272_PI429285431	1.37e-09	0.461518	lncRNA		CUST_19272_PI429285431	CUST_19272_PI429285431	FALSE	lncRNA	lnc-CCDC28A-1:1		lncipedia2.1	-				chr6	139017734	139018650	+	intergenic					ACGCTGGCAATGAATTTTCTCTAGCTGCTTATTCTACCCCAACCTTGGTCTTCCTTCTGT
CUST_34294_PI429285431	1.97e-09	2.24247	lncRNA		CUST_34294_PI429285431	CUST_34294_PI429285431	FALSE	lncRNA	n341154|BC036614|mRNAlikelncRNA|Homosapiens|HumanlncRNA|JounralRNA|3620|NULL|-1.0971800|-0.2551375		NONCODERv3	-				chr11	128659851	128662764	+	intronic_sense	FLI1	+	2313	Friend leukemia virus integration 1	ACATCTTCTAGTGAAAGACCAACGTATAGGAAGCATCATTTGTGGTGGTTTCACAGATTT
LNCA_19_P00327320	3.88e-08	0.439455	lncRNA	XLOC_006725	LNCA_21_P0000350	LNCA_21_P0000350	FALSE	lncRNA	NR_002999	NR_002999	Agilent_HUMAN_G3V2	-	SCARNA20	small Cajal body-specific RNA 20		chr17	58308877	58308936	-	intronic_sense	USP32	-	84669	ubiquitin specific peptidase 32 (EC:3.1.2.15)	GAGGATCGTCGTCAGGACTGCCACGAGTGGGGCAGCCTTGTTTTCCTGCCTCAGACATGT
CUST_21089_PI429285431	2.11e-06	2.93687	lncRNA		CUST_21089_PI429285431	CUST_21089_PI429285431	FALSE	lncRNA	lnc-CTU2-6:7		lncipedia2.1	-				chr16	88751541	88753588	+	exonic_antisense	SNAI3	-	333929	snail homolog 3 (Drosophila)	TTCTGGAATTCCCAGGGGGTCAGACATGGTTATGGGAAGTTTAATAAAACCGGTGAATCA
CUST_31055_PI429285431	2.18e-09	0.416972	lncRNA		CUST_31055_PI429285431	CUST_31055_PI429285431	FALSE	lncRNA	n337279|BC128040|mRNAlikelncRNA|Homosapiens|NULL|H-invitationalv7.5|HIT000389586|http://h-invitational.jp/hinv/spsoup/transcript_view?hit_id=HIT000389586|1.1733700|-1.0000000		NONCODERv3	-				chr12	9436254	9436606	+	intergenic					ATTTCTCACTGCCTTCTGTCTGCCCAGTTTCACCGGGAGAAGTCGGCCTCTTCCTGATGG
CUST_23690_PI429285431	3.22e-06	2.68713	lncRNA		CUST_23690_PI429285431	CUST_23690_PI429285431	FALSE	lncRNA	lnc-OR4F29-1:1		lncipedia2.1	-				chr1	328311	328778	+	intergenic					CGGCAGCCTCTTGGCCTCTAATTTGTTTATCTTTTGTGTATAAATCCCAAAATATTGAAT
CUST_6649_PI429285431	3.8e-09	0.325032	lncRNA		CUST_6649_PI429285431	CUST_6649_PI429285431	FALSE	lncRNA	"transcript_id ""ENST00000456265.1"" | genecode_v17"		gencode_v17	-				chr20	12845850	12848849	-	intergenic					CTCCATTCATGGCATCAGGCCTGAATAATGGTCCAAAGGCTTTCTCTCACCCTTTTATAT
CUST_2681_PI429285431	3.87e-07	0.352159	lncRNA		CUST_2681_PI429285431	CUST_2681_PI429285431	FALSE	lncRNA	"transcript_id ""ENST00000446887.1"" | genecode_v17"		gencode_v17	-				chr6	159485760	159486090	-	intergenic					ATCTCACTATCAGTTTAGGAAATTCTCTGGTCTTCATGCTGGCTTCTGACCCTTGTGTCG
CUST_27600_PI429285431	1.11e-06	2.61194	lncRNA		CUST_27600_PI429285431	CUST_27600_PI429285431	FALSE	lncRNA	n324803|NULL|mRNAlikelncRNA|Homosapiens|vegalncRNA|GENCODE|OTTHUMT00000194139|http://vega.sanger.ac.uk/Homo_sapiens/Transcript/Summary?db=core;t=OTTHUMT00000194139|0.0710239|-0.3611588		NONCODERv3	-				chr21	35039923	35042554	+	intronic_sense	ITSN1	+	6453	intersectin 1 (SH3 domain protein)	CTCAGAAGCCTTACAGTCCACACCATTTGTTCTATCCTTTCAATTCAGGTTTTATTTGTT
CUST_27780_PI429285431	0.000175037	0.498596	lncRNA		CUST_27780_PI429285431	CUST_27780_PI429285431	FALSE	lncRNA	n325001|NULL|mRNAlikelncRNA|Homosapiens|vegalncRNA|GENCODE|OTTHUMT00000315979|http://vega.sanger.ac.uk/Homo_sapiens/Transcript/Summary?db=core;t=OTTHUMT00000315979|1.0713700|-0.1907653		NONCODERv3	-				chr20	33564809	33567808	+	exonic_sense	MYH7B	+	57644	"myosin, heavy chain 7B, cardiac muscle, beta"	GACCAAAGACCAGAAGGTTCCGTTCCCCCTTTCCTGAGATTAGCCTCTCTGTCCCTAGGC
CUST_50929_PI429285431	7.47e-06	0.451187	lncRNA		CUST_50929_PI429285431	CUST_50929_PI429285431	FALSE	lncRNA	hg19_lincRNAsTranscripts_TCONS_l2_00006194 range=chr12:31958675-31961607 5'pad=0 3'pad=0 strand=- repeatMasking=none		UCSC	-				chr12	31958675	31960881	-	intergenic					AAGTCAACGTCATATGTATTAAAATACACTGCGTGTCTCCCATCCACATGACAAGTATTG
CUST_949_PI429285431	1.01e-12	3.36424	lncRNA		CUST_949_PI429285431	CUST_949_PI429285431	FALSE	lncRNA	"transcript_id ""ENST00000409898.2"" | genecode_v17"		gencode_v17	-				chr2	87754995	87755554	+	intergenic					TGCAGTCACCAGCATCTTTTCCAACCTTAATGAACTGTATCCTCAAAAGAACACTATCAG
CUST_10539_PI429285431	1.52e-07	2.46177	lncRNA		CUST_10556_PI429285431	CUST_10556_PI429285431	FALSE	lncRNA	lnc-TRAPPC12-3:2		lncipedia2.1	-				chr2	2876131	2876602	+	intergenic					GAGAGTGCTCCCCGACCCATCTCTCTTCTCTGGCTGCAGTTATTCTGAGGCCTCTGATTC
CUST_14050_PI429285431	5.98e-06	0.40899	lncRNA		CUST_14050_PI429285431	CUST_14050_PI429285431	FALSE	lncRNA	lnc-THADA-1:1		lncipedia2.1	-				chr2	43370001	43370378	-	intergenic					TTGGTTACTCAGTTGTCCTCCCTGGTCTGTCCTCAAGGCGTGATTTGGGCTGGGGTTCTG
CUST_21917_PI429285431	0.000110144	2.54174	lncRNA		CUST_21917_PI429285431	CUST_21917_PI429285431	FALSE	lncRNA	lnc-C2orf42-3:19		lncipedia2.1	-				chr2	70313256	70313802	-	bidirectional	PCBP1	+	5093	poly(rC) binding protein 1	TAGATGGTGGCTTTCTTTGGACCCTTGACATCAACCAGTTACTATTTGGGGACCAGATGT
CUST_9118_PI429285431	4.21e-08	0.427098	lncRNA		CUST_9118_PI429285431	CUST_9118_PI429285431	FALSE	lncRNA	lnc-UXS1-3:1		lncipedia2.1	-				chr2	106510079	106511214	-	exonic_antisense	NCK2	+	8440	NCK adaptor protein 2	TCTTTCTGAGTCACCGGTTCCCTCTTTTGCAGACTGCCTTTCCAGGAAATTCTTTATTGC
CUST_14326_PI429285431	9.98e-07	0.4309	lncRNA		CUST_14326_PI429285431	CUST_14326_PI429285431	FALSE	lncRNA	lnc-RP11-677O4.1.1-2:2		lncipedia2.1	-				chr18	11490466	11490722	-	intergenic					AGGAACAGCTTCTTCTCTACGCATGGCTCTGTGTGCAGTGTTCGCCTGATTCTGAAGATG
CUST_3847_PI429285431	0.00597379	2.92225	lncRNA		CUST_3847_PI429285431	CUST_3847_PI429285431	FALSE	lncRNA	"transcript_id ""ENST00000605240.1"" | genecode_v17"		gencode_v17	-				chr11	333192	333688	+	intergenic					CTGGTGTATTTAAAGTCTGTGTTGATGGGTGCATATATTTTTAACGTTTCCCTATTGTGA
CUST_33295_PI429285431	4.71e-08	2.82375	lncRNA		CUST_33304_PI429285431	CUST_33304_PI429285431	FALSE	lncRNA	n340021|AL110200|mRNAlikelncRNA|Homosapiens|HumanlncRNA|JounralRNA|2475|NULL|-0.0406070|-0.3112856		NONCODERv3	-				chr10	45931683	45934622	+	intronic_sense	ALOX5	+	240	arachidonate 5-lipoxygenase (EC:1.13.11.34)	TTCTAGGGCACAGATCAGGTATCAGTGGCCCAGGCATCTCATGCAAACGGGTGTGGCAGT
CUST_26274_PI429285431	1.46e-07	3.05379	lncRNA		CUST_26274_PI429285431	CUST_26274_PI429285431	FALSE	lncRNA	lnc-CEP170-1:9		lncipedia2.1	-				chr1	243245192	243245623	-	intergenic					ATCAAATAATAGTGCATGCATCAAGTGCAATGGGAAGCTCTTCTGGAGAGGGAGAGAAGC
LNCA_23_P322013	5.11e-07	0.469187	lncRNA	FER1L6-AS1
CUST_50167_PI429285431	3.71e-07	0.493832	lncRNA		CUST_50167_PI429285431	CUST_50167_PI429285431	FALSE	lncRNA	hg19_lincRNAsTranscripts_TCONS_l2_00028634 range=chr9:15007843-15019701 5'pad=0 3'pad=0 strand=+ repeatMasking=none		UCSC	-				chr9	15007843	15008360	+	intergenic					ATAAAAATGTTGTTGGATACAGAGAGCTCCCTGAAACAGATGCTGACCTCAAGAGAATTT
CUST_47193_PI429285431	1.07e-08	0.49082	lncRNA		CUST_47193_PI429285431	CUST_47193_PI429285431	FALSE	lncRNA	"gi|312032428|ref|NR_037161.1| Homo sapiens ZNF582 antisense RNA 1 (head to head) (ZNF582-AS1), transcript variant 3, non-coding RNA"		ncbi	-				Chr19	56905045	56906392	+	intergenic					TTGAGTGAGGACTGGAGTCCTGAGTGACTCTTTTGATTTGATCCTGTTTCCCTCAAACCT
CUST_39218_PI429285431	1.83e-06	0.428884	lncRNA		CUST_39218_PI429285431	CUST_39218_PI429285431	FALSE	lncRNA	n386029|NULL|lncRNA|Homosapiens||UCSCGeneNoncode|uc009zdo.1||-1.1683300|-0.3334383		NONCODERv3	-				chr12	1011721	1014720	+	intronic_sense	WNK1	+	65125	WNK lysine deficient protein kinase 1 (EC:2.7.11.1)	TCTGTGGATAAGCAATGGTCACGCCTCCTGAGCTTCTTGTATTTAGCTTTTGACAGCTCT
LNCA_21_P0011426	9.91e-08	0.480688	lncRNA	KIAA0664L3	LNCA_32_P46238	LNCA_32_P46238	FALSE	lncRNA	NR_001443	NR_001443	Agilent_HUMAN_G3V2	-	LOC339240	keratin 17 pseudogene	GO:0005576(extracellular region)	chr17	20422676	20422735	-	intergenic					GGGCACTGGTCCATGACCTGTTGTCTTTCTGTATCTACTTTCTGCAGCCCCTCACTGAGG
LNCA_21_P0012434	1.73e-08	0.439023	lncRNA	XLOC_l2_010113	LNCA_33_P3311621	LNCA_33_P3311621	FALSE	lncRNA	NR_034027	NR_034027	Agilent_HUMAN_G3V2	-	LOC338739	uncharacterized LOC338739		chr11	33211781	33211840	+	intergenic					ATGATGTGCTTTGGGATTTGGGACTTAACCTCCTTGGCCTTTTTGAGGACTTTGATAGAC
CUST_33493_PI429285431	1.26e-08	2.88735	lncRNA		CUST_33496_PI429285431	CUST_33496_PI429285431	FALSE	lncRNA	n340235|CR610181|mRNAlikelncRNA|Homosapiens|HumanlncRNA|JounralRNA|2696|NULL|-0.5802580|-0.1381845		NONCODERv3	-				chr4	141071317	141072902	-	intronic_sense	MAML3	-	55534	mastermind-like 3 (Drosophila)	CATAGTGAATCCCAGTTTAGCAAATTAGCAACAAATAGACTTGAAAGATGACTGCGTGAA
CUST_32847_PI429285431	6.53e-06	0.292334	lncRNA		CUST_32847_PI429285431	CUST_32847_PI429285431	FALSE	lncRNA	n339509|AJ011409|mRNAlikelncRNA|Homosapiens|HumanlncRNA|JounralRNA|1950|NULL|1.0244800|-0.1748276		NONCODERv3	-				chr21	40394925	40395843	-	intergenic					TTAGTTTCTCTCCCTGAACCACATTTTGAGCTGAGTGAAGGTCTCAGGTTGGCCTTTAGA
CUST_48899_PI429285431	2.53e-07	0.394148	lncRNA		CUST_48899_PI429285431	CUST_48899_PI429285431	FALSE	lncRNA	hg19_lincRNAsTranscripts_TCONS_l2_00018728 range=chr3:107148564-107152046 5'pad=0 3'pad=0 strand=+ repeatMasking=none		UCSC	-				chr3	107148564	107149940	+	intergenic					AGATTCAGAGAGGCTGTTCCTGGTTTCTTGGCTAAGGTCCTTTCTACTATCCAGACTACA
CUST_218_PI429201921	1.92e-07	3.61253	lncRNA		CUST_21809_PI429285431	CUST_21809_PI429285431	FALSE	lncRNA	lnc-AMDHD1-1:1		lncipedia2.1	-				chr12	96404796	96405657	+	intronic_antisense	LTA4H	-	4048	leukotriene A4 hydrolase (EC:3.3.2.6)	TTATTTTGCTACCTTTCCTCTGTCCTAGCTCTAAAATGAAGATCCTCTAAGGTTCTACAG
CUST_18240_PI429285431	0.000382118	0.475221	lncRNA		CUST_18240_PI429285431	CUST_18240_PI429285431	FALSE	lncRNA	lnc-SMUG1-3:4		lncipedia2.1	-				chr12	54519544	54520042	-	intergenic					AGCAATTTTCTCCCTCTCCAGGCCTCTTACAGATGTGAAACAACTGGCAGATCTGACTTT
CUST_27940_PI429285431	1.9e-07	0.361797	lncRNA		CUST_27940_PI429285431	CUST_27940_PI429285431	FALSE	lncRNA	n325184|NULL|mRNAlikelncRNA|Homosapiens|vegalncRNA|GENCODE|OTTHUMT00000330878|http://vega.sanger.ac.uk/Homo_sapiens/Transcript/Summary?db=core;t=OTTHUMT00000330878|-1.2384800|-0.3996563		NONCODERv3	-				chr2	108032087	108032474	-	intergenic					TACTTTCATTTTTGGCAAGTTGTAGCTCCCCTCATCATTTCTGCAGCCGGTTGAGAGACA
CUST_25400_PI429285431	0.00235132	0.393672	lncRNA		CUST_25400_PI429285431	CUST_25400_PI429285431	FALSE	lncRNA	lnc-TBCCD1-1:1		lncipedia2.1	-				chr3	186383252	186383785	-	bidirectional	HRG	+	3273	histidine-rich glycoprotein	CTCCCCTCAAACCTGGCATCGGAGTTTATTGAAACAAAGCAAAATAAAACAAATAGACAA
CUST_2414_PI429285431	6.55e-08	0.305043	lncRNA		CUST_24163_PI429285431	CUST_24163_PI429285431	FALSE	lncRNA	lnc-TMBIM1-2:2		lncipedia2.1	-				chr2	219231650	219232178	-	exonic_antisense	C2orf62	+	375307	chromosome 2 open reading frame 62	ACCGCCTGCTATGGACTGAATTGTCTCTCTAACCCCCAGTGTGGTGGTATTTGGAGAAAG
CUST_50317_PI429285431	0.00189209	0.377698	lncRNA		CUST_50317_PI429285431	CUST_50317_PI429285431	FALSE	lncRNA	hg19_lincRNAsTranscripts_TCONS_l2_00029558 range=chr9:114035101-114046974 5'pad=0 3'pad=0 strand=- repeatMasking=none		UCSC	-				chr9	114035101	114035426	-	intergenic					TCCTATTTCACCTTTCCTCTCTCTTCCAGCCCCATTGCAATCAGAAGATTATTTATGGAA
CUST_34089_PI429285431	2e-07	0.472022	lncRNA		CUST_34089_PI429285431	CUST_34089_PI429285431	FALSE	lncRNA	n340913|AL833696|mRNAlikelncRNA|Homosapiens|HumanlncRNA|JounralRNA|3378|NULL|1.1576800|-0.1694017		NONCODERv3	-				chr17	78174028	78177027	-	exonic_antisense	CARD14	+	79092	"caspase recruitment domain family, member 14"	AAGCATCCATCACAAAGAAACAACATCTTCAGCAGTGATCTTGGCAGGCTTCCCTCCTTA
LNCA_21_P0002262	4.63e-08	7.01255	lncRNA	XLOC_001596	LNCA_21_P0005023	LNCA_21_P0005023	FALSE	lncRNA			Agilent_HUMAN_G3V2	-	XLOC_005711			chr6	40239504	40239563	-	intergenic					AGGCTGTGTCTCCCTCCTCAGACTGAAGGATCTTTGTGATCAGATGCTGTGTCTATATCC
CUST_8899_PI429285431	9.35e-09	0.406051	lncRNA		CUST_8899_PI429285431	CUST_8899_PI429285431	FALSE	lncRNA	lnc-KIAA1147-2:2		lncipedia2.1	-				chr7	141437998	141440256	-	exonic_antisense	SSBP1	+	6742	single-stranded DNA binding protein 1	TTATTTTAATCACCAGTGTATGTTCTCCTGCTCCCTGGACAAATCCATCAGCAGCGGCAA
CUST_36054_PI429285431	1.16e-10	3.19684	lncRNA		CUST_36054_PI429285431	CUST_36054_PI429285431	FALSE	lncRNA	n344651|NULL|lincRNA|Homosapiens|HumanlincRNA|ScriptureReconstructionLincRNAsByLuo[unpublished]|linc_luo_199|NULL|-1.4735300|-0.3119878		NONCODERv3	-				chr2	111964137	111967104	-	intergenic					AAGTTCATGACCCTGATACATTCTTGTCCAGGTAGTATAGCTCCAGACCAAATGTCTGCG
CUST_10917_PI429285431	3.24e-10	0.443421	lncRNA		CUST_10917_PI429285431	CUST_10917_PI429285431	FALSE	lncRNA	lnc-CCND1-1:1		lncipedia2.1	-				chr11	69681818	69682164	+	intergenic					TCCCTTTGGCTGCACCCAGGAGATGTGACTTCGAACTAAGTCTCCCCAGGCTCAATGTCC
CUST_52139_PI429285431	2.55e-06	0.482564	lncRNA		CUST_5213_PI429285431	CUST_5213_PI429285431	FALSE	lncRNA	"transcript_id ""ENST00000560662.1"" | genecode_v17"		gencode_v17	-				chr15	67278704	67279036	-	intergenic					AACATCTTGCATTCTCTCGGGATGCTGATTTCTAACTGCTCTTTGGCCTTTCCTGCATTG
CUST_47747_PI429285431	0.000175782	2.12598	lncRNA		CUST_47747_PI429285431	CUST_47747_PI429285431	FALSE	lncRNA	"gi|385137069|ref|NR_047607.1| Homo sapiens ubiquitously transcribed tetratricopeptide repeat gene, Y-linked (UTY), transcript variant 37, non-coding RNA"		ncbi	-				ChrY	15360259	15363258	-	intergenic					CAGTCCTGCCAAGAAGAAAAGAACATCTAGTCCAACAAAGGTATATATACATTTTAGAGA
LNCA_19_P00322933	3.58e-08	2.84976	lncRNA	LOC100506190	LNCA_19_P00812562	LNCA_19_P00812562	FALSE	lncRNA	XM_001716361	XM_001716361	Agilent_HUMAN_G3V2	-	LOC388210	apolipophorins-like		chr16	11479082	11479141	-	intergenic					GGACAGGCTCGGGGCTCACAGCCCTGTTCGTGGAACTTAACCACAAGACCCTCATCCTCT
CUST_29451_PI429285431	3.35e-07	2.21985	lncRNA		CUST_29451_PI429285431	CUST_29451_PI429285431	FALSE	lncRNA	n332853|AF075100|mRNAlikelncRNA|Homosapiens|NULL|H-invitationalv7.5|HIT000066122|http://h-invitational.jp/hinv/spsoup/transcript_view?hit_id=HIT000066122|-1.3292200|-0.2856716		NONCODERv3	-				chr13	50613138	50613549	-	intergenic					ACACACTAATTTTATAATTTAAAAGAGCAATAGTAGTTTCATTCAGAAAGACAGGTTTAA
CUST_43830_PI429285431	8.92e-09	22.1356	lncRNA		CUST_43830_PI429285431	CUST_43830_PI429285431	FALSE	lncRNA	"gi|224586936|ref|NR_027252.1| Homo sapiens CYP1B1 antisense RNA 1 (CYP1B1-AS1), non-coding RNA"		ncbi	-				Chr2	38358247	38360022	+	intergenic					GACCATAACTCACTTAAAAGCCTGAAAGCTGTTTTATGCCAACTAATAAAGTGCAGTTTA
CUST_13061_PI429285431	6.3e-12	0.413195	lncRNA		CUST_13078_PI429285431	CUST_13078_PI429285431	FALSE	lncRNA	lnc-F13A1-3:6		lncipedia2.1	-				chr6	6711105	6712585	-	intergenic					TTCCCATAAGAGGGTGCATGTTCTCTCCCTTGACTAACTCTTCAGTATGCCTCATTCTCA
CUST_23648_PI429285431	0.000226004	0.292912	lncRNA		CUST_23648_PI429285431	CUST_23648_PI429285431	FALSE	lncRNA	lnc-ZFAT-3:1		lncipedia2.1	-				chr8	136469108	136469425	-	bidirectional	KHDRBS3	+	10656	"KH domain containing, RNA binding, signal transduction associated 3"	CTTCCCTGGACAGCCTCTCAGGACCTCCCTGGCAAATCTCAACTTGCAAGAAGCAGAAAA
CUST_15338_PI429285431	3.29e-09	0.414261	lncRNA		CUST_15338_PI429285431	CUST_15338_PI429285431	FALSE	lncRNA	lnc-SULF2-2:2		lncipedia2.1	-				chr20	46528127	46531126	-	intergenic					TGGATCTCCAGCTCAGTGACTCTCAGACTTCAAAGGCAGCACCAGCTCCTCCGTGGATCT
CUST_16700_PI429285431	4.58e-06	2.58581	lncRNA		CUST_16700_PI429285431	CUST_16700_PI429285431	FALSE	lncRNA	lnc-FRG1-5:5		lncipedia2.1	-				chr4	190198625	190198931	+	intergenic					TATGTGACAGGCTCTCATAGTCACCATCATCACAGGAATCTTGTGCATGTTACAGGGAAG
CUST_9919_PI429285431	1.37e-07	2.00036	lncRNA		CUST_9919_PI429285431	CUST_9919_PI429285431	FALSE	lncRNA	lnc-AKT3-2:1		lncipedia2.1	-				chr1	244210736	244212069	-	bidirectional	ZBTB18	+			ATCACAGCCACAAAGACGTGGAAATGTCTGCCGTCAAGAAATTGGAAATCGTATCGAGAA
CUST_37640_PI429285431	9.61e-07	0.467417	lncRNA		CUST_37640_PI429285431	CUST_37640_PI429285431	FALSE	lncRNA	n346118|NULL|lincRNA|Homosapiens|HumanlincRNA|ScriptureReconstructionLincRNAsByLuo[unpublished]|linc_luo_1668|NULL|-1.2685800|-0.2113108		NONCODERv3	-				chr9	34665066	34665513	-	intergenic					AGGAAGGATCTACTGGGGCTGTTTCTACTTTTTCCCCTGGCTTCGCATGTGGCGGAGGGA
CUST_19173_PI429285431	0.00685433	0.461351	lncRNA		CUST_19173_PI429285431	CUST_19173_PI429285431	FALSE	lncRNA	lnc-METAP1-2:1		lncipedia2.1	-				chr4	99915951	99916572	+	intergenic					GGATCAGCACAATTCTCCCCTATTTACTGCTGAAGCAATCAACTGGGATTATACAAAAAA
CUST_33521_PI429285431	4.01e-05	0.486206	lncRNA		CUST_33535_PI429285431	CUST_33535_PI429285431	FALSE	lncRNA	n340277|AK123211|mRNAlikelncRNA|Homosapiens|HumanlncRNA|JounralRNA|2738|NULL|-1.0476500|-0.3040805		NONCODERv3	-				chr4	174245757	174247314	-	intergenic					TTAGGTATCTGGCTTTCTGGTGAGGTACTTGTCATGTTTTCCATTGAATTATATATGGAT
CUST_41482_PI429285431	4.79e-08	2.32826	lncRNA		CUST_41482_PI429285431	CUST_41482_PI429285431	FALSE	lncRNA	ENST00000582634 ncrna:miRNA chromosome:GRCh37:8:131020580:131020699:-1 gene:ENSG00000264653 gene_biotype:miRNA transcript_biotype:miRNA		ensembl.GRCh37.72	-				chr8	131020580	131020699	-	intergenic					TTCTTTTCACTCAGGAATTGGATAAGCTTTTCTGAGGGGTTTGGAATGGGATGGCAGGGA
LNCA_19_P00317704	0.000210458	2.61753	lncRNA	LOC100507006	LNCA_19_P00319050	LNCA_19_P00319050	FALSE	lncRNA	XR_109905	XR_109905	Agilent_HUMAN_G3V2	-				chr2	112005725	112005784	-	intergenic					ATGTCTTCGGCTACACTGGTGAAGGCATCGTGCCTGCTCCACAGCACATTTTTATTCAAG
CUST_24837_PI429285431	1.32e-05	0.478597	lncRNA		CUST_24898_PI429285431	CUST_24898_PI429285431	FALSE	lncRNA	lnc-CTAGE1-1:2		lncipedia2.1	-				chr18	20366713	20367093	-	intergenic					AATAAATCAGAGATGGCCTGGATTCTGCCATGTAAATCAAAGAAGAGAGGGCCTAACTCA
CUST_18640_PI429285431	5.82e-06	0.382227	lncRNA		CUST_18656_PI429285431	CUST_18656_PI429285431	FALSE	lncRNA	lnc-GTF2F2-2:6		lncipedia2.1	-				chr13	45952665	45953238	+	intergenic					CTTCCTAAAATAGAGCTCTCAAAACCTGGCTGTTTTCCTTCAGAGCACTGGCCTCCAATT
CUST_34738_PI429285431	6.41e-08	0.443191	lncRNA		CUST_34738_PI429285431	CUST_34738_PI429285431	FALSE	lncRNA	n341645|CR627004|mRNAlikelncRNA|Homosapiens|HumanlncRNA|JounralRNA|4116|NULL|-1.2714900|-0.3358989		NONCODERv3	-				chr9	2423836	2426835	-	intergenic					AGAAATCTTGTTTTTTCTCTGAAACAACATTCAGCTACACCCATGGCTGGGCTCTCCTGG
CUST_48821_PI429285431	2.96e-09	3.82018	lncRNA		CUST_48821_PI429285431	CUST_48821_PI429285431	FALSE	lncRNA	hg19_lincRNAsTranscripts_TCONS_l2_00015637 range=chr2:243030784-243082789 5'pad=0 3'pad=0 strand=+ repeatMasking=none		UCSC	-				chr2	243030784	243032018	+	intergenic					TCTAAAGAAGAATCTGAAGTGAAATGACATCAAGAGACCTATCAAGACCTGTATCCAGGA
CUST_2861_PI429285431	1.65e-07	2.8031	lncRNA		CUST_2861_PI429285431	CUST_2861_PI429285431	FALSE	lncRNA	"transcript_id ""ENST00000412091.1"" | genecode_v17"		gencode_v17	-				chr7	65956996	65957677	-	intergenic					AAATGCAGATCTGAACCATACCCAGTTGGGATTGGGGTACACACTCTACTCCTCTGAAAA
CUST_43273_PI429285431	0.000150131	2.65363	lncRNA		CUST_43273_PI429285431	CUST_43273_PI429285431	FALSE	lncRNA	ENST00000587007 havana:sense_intronic chromosome:GRCh37:19:31827904:31829830:-1 gene:ENSG00000267753 gene_biotype:sense_intronic transcript_biotype:sense_intronic		ensembl.GRCh37.72	-				chr19	31827904	31829830	-	intronic_sense	TSHZ3	-	57616	teashirt zinc finger homeobox 3	AGAGAGAAAAGATAATTAAAAAGATATGACCCTTGCAAGTACTTGCTCTGGGTTGCCTGT
CUST_2217_PI429285431	5.55e-05	0.468788	lncRNA		CUST_2217_PI429285431	CUST_2217_PI429285431	FALSE	lncRNA	"transcript_id ""ENST00000504382.1"" | genecode_v17"		gencode_v17	-				chr5	82236277	82236802	-	intergenic					TTTAAGCTGTCATGTGCTGTCAGTGTAGTCCCACTCATCCCCTTCTCTGGAAACTATACT
CUST_1305_PI429285431	1.11e-06	0.413268	lncRNA		CUST_1305_PI429285431	CUST_1305_PI429285431	FALSE	lncRNA	"transcript_id ""ENST00000412578.1"" | genecode_v17"		gencode_v17	-				chr3	10801169	10804037	-	intergenic					TCTAAATAAAGATATCTAATAAGGGTGGAACACGTCACAGCTCTCAACCTCCTCTCAGAC
CUST_38929_PI429285431	1.32e-07	2.64724	lncRNA		CUST_38954_PI429285431	CUST_38954_PI429285431	FALSE	lncRNA	n385129|NULL|lncRNA|Homosapiens||UCSCGeneNoncode|uc003teo.1||1.0322000|-0.2072867		NONCODERv3	-				chr7	35082722	35084163	+	intergenic					GGTGTCTTTTAGTCACCTGAAACCCCAAAGCCCAAGCCTGCTTTTCCTCCAGTCTCCTTA
CUST_62_PI429201921	7.59e-07	3.34902	lncRNA		CUST_6278_PI429285431	CUST_6278_PI429285431	FALSE	lncRNA	"transcript_id ""ENST00000577382.1"" | genecode_v17"		gencode_v17	-				chr18	75897223	75899949	+	intergenic					ACAATAGCCTTCCTCCCAAGACTGTGGAATAAATAAGAGACACATCGCTCCAAAACATTT
CUST_45548_PI429285431	1.32e-07	2.47427	lncRNA		CUST_45548_PI429285431	CUST_45548_PI429285431	FALSE	lncRNA	"gi|410170598|ref|XR_109026.4| PREDICTED: Homo sapiens supervillin pseudogene (LOC645954), misc_RNA"		ncbi	-													TCTATCTCACCGACGAAGACTTCGAGTTTGCACTAGACATGATGAGGGACGAATACAATG
CUST_1164_PI429285431	8.32e-07	0.434363	lncRNA		CUST_1164_PI429285431	CUST_1164_PI429285431	FALSE	lncRNA	"transcript_id ""ENST00000444567.1"" | genecode_v17"		gencode_v17	-				chr2	176121978	176122458	+	intergenic					CAAGAGACCATAATTCCCATAGTCAAGGTAATCTGTATCTCTGGCCTCCTTGTCTGACTG
LNCA_21_P0003690	0.000571034	0.354688	lncRNA	XLOC_003809	LNCA_21_P0006639	LNCA_21_P0006639	FALSE	lncRNA			Agilent_HUMAN_G3V2	-	XLOC_008348			chr10	3309069	3309128	+	intergenic					ATATGAGGAACTTAGCAAATGGACTCATTCTTCATTTTCTTCTTCCTCTCTCTCCTGATT
CUST_16698_PI429285431	9.09e-08	0.435434	lncRNA		CUST_1669_PI429285431	CUST_1669_PI429285431	FALSE	lncRNA	"transcript_id ""ENST00000437428.2"" | genecode_v17"		gencode_v17	-				chr3	197880121	197882288	+	exonic_sense	FAM157A	+	728262	"family with sequence similarity 157, member A"	GAATATAGAAAATGGATGGACAACTGGACCTACCATGAAAGACTTCTGAATCCAGGAAGA
CUST_2054_PI429285431	3.5e-06	0.404768	lncRNA		CUST_2054_PI429285431	CUST_2054_PI429285431	FALSE	lncRNA	"transcript_id ""ENST00000511721.1"" | genecode_v17"		gencode_v17	-				chr5	4967877	4968320	-	intergenic					ATTGTGGAGATACGGTGCAGAGAACAATACATGAATAAATACAACTGGATTCTGCTCTAC
CUST_38515_PI429285431	0.00103492	0.449468	lncRNA		CUST_38515_PI429285431	CUST_38515_PI429285431	FALSE	lncRNA	n383106|NULL|lncRNA|Homosapiens||UCSCGeneNoncode|uc002gzc.1||4.5462600|-0.4465352		NONCODERv3	-				chr17	22024074	22024984	+	intergenic					CCCGATTCCACTACGATCAACTCATGTATCTCTTATGAAAAAATTTCTTACCATTTACAC
CUST_39866_PI429285431	3.46e-09	4.24583	lncRNA		CUST_39866_PI429285431	CUST_39866_PI429285431	FALSE	lncRNA	n406533|NR_024046|lncRNA|Homosapiens||RefGeneNoncode|NR_024046||2.1279800|-0.1554860		NONCODERv3	-				chr3	47053031	47054042	+	intergenic					ATTAAGCCTCAGCTGGTTTTGCTACTTTTGTAACCCATATTAAAGGTGATTCGGACTTTT
CUST_46916_PI429285431	4e-07	0.422947	lncRNA		CUST_46916_PI429285431	CUST_46916_PI429285431	FALSE	lncRNA	"gi|310123704|ref|XR_109424.1| PREDICTED: Homo sapiens uncharacterized LOC400618 (FLJ37644), misc_RNA"		ncbi	-													AAACTCTGGATCTGAAGGGAATGTTCATGACTATTTCATCCCTCCTGCTGCCTTGGAGAA
CUST_8000_PI429285431	4.09e-05	0.390051	lncRNA		CUST_8035_PI429285431	CUST_8035_PI429285431	FALSE	lncRNA_mRNA	lnc-ITGAL-1:1		lncipedia2.1	"ENST00000252799,ENST00000395094"				chr16	30541404	30543354	+	exonic_antisense	ZNF747	-	65988	zinc finger protein 747	GGAAATTAAAACCTGGTACAAAGGTATCTCCTACTGCCAAGGTTCCTCTTCTCACCCCAT
CUST_36562_PI429285431	0.000338168	0.470963	lncRNA		CUST_36562_PI429285431	CUST_36562_PI429285431	FALSE	lncRNA	n345060|NULL|lincRNA|Homosapiens|HumanlincRNA|ScriptureReconstructionLincRNAsByLuo[unpublished]|linc_luo_609|NULL|-1.5496400|-0.2786554		NONCODERv3	-				chr9	129999485	130000415	-	intergenic					AGATACTGTGGAATGACTTGCTCAATACCCACTTCAGTCCCCTTCCACTGTGCAAAAGTT
CUST_22674_PI429285431	1.83e-06	0.468878	lncRNA		CUST_22674_PI429285431	CUST_22674_PI429285431	FALSE	lncRNA	lnc-KLC1-1:1		lncipedia2.1	-				chr14	104028104	104028656	+	exonic_antisense	BAG5	-	9529	BCL2-associated athanogene 5	TGGGCTTTCGAGGCCCAACACCTCCTCAGCCCCCAACATGCTCCACTCTCTCAAAAAAAA
CUST_24692_PI429285431	8.75e-07	3.67207	lncRNA		CUST_24694_PI429285431	CUST_24694_PI429285431	FALSE	lncRNA_mRNA	lnc-AC003682.1-1:1		lncipedia2.1	"gi|459352758|ref|NM_001277093.1|,gi|459352756|ref|NM_001277092.1|,gi|459352754|ref|NM_001277091.1|,gi|459352752|ref|NM_001277090.1|"				chr19	58071024	58074023	-	exonic_sense	ZNF550	-	162972	zinc finger protein 550	CCTCTCCCATAAGATGGACAAAAGTGTTTCTGTATCACTGTGTCCCAGACAATATTTAGA
LNCA_19_P00318191	1.07e-08	2.10356	lncRNA	LOC401320	LNCA_19_P00319503	LNCA_19_P00319503	FALSE	lncRNA	XR_109905	XR_109905	Agilent_HUMAN_G3V2	-				chr2	112005727	112005786	-	intergenic					ACATGTCTTCGGCTACACTGGTGAAGGCATCGTGCCTGCTCCACAGCACATTTTTATTCA
CUST_28870_PI429285431	5.52e-05	0.371584	lncRNA		CUST_28870_PI429285431	CUST_28870_PI429285431	FALSE	lncRNA	n326291|NULL|mRNAlikelncRNA|Homosapiens|vegalncRNA|GENCODE|OTTHUMT00000098608|http://vega.sanger.ac.uk/Homo_sapiens/Transcript/Summary?db=core;t=OTTHUMT00000098608|-1.1249000|-0.4382651		NONCODERv3	-				chr1	190111247	190113281	+	intronic_antisense	FAM5C	-	339479	"family with sequence similarity 5, member C"	GTTGCATTATAGTAAACTCTCTTTCTCCCCCTAATTAAAGCCCACCAATTTTAAAGTCAT
CUST_31982_PI429285431	2.35e-07	2.32768	lncRNA		CUST_31982_PI429285431	CUST_31982_PI429285431	FALSE	lncRNA	n338541|M91159|mRNAlikelncRNA|Homosapiens|HumanlncRNA|JounralRNA|945|NULL|-0.0443149|-0.3721996		NONCODERv3	-				chr1	226257216	226257653	+	intronic_sense	H3F3A	+	3020	"H3 histone, family 3A"	GCAGATGTTTTGGCTTAGACTAAAAGATTCTTCAGCTTTTCAGACAGCTATAAGTATACT
LNCA_21_P0013999	6.73e-09	4.38419	lncRNA	LOC100653051
CUST_24384_PI429285431	2.24e-07	2.5934	lncRNA		CUST_24432_PI429285431	CUST_24432_PI429285431	FALSE	lncRNA	lnc-UNG-1:2		lncipedia2.1	-				chr12	109563066	109563441	+	intergenic					TTCTGAGAACCTGGCCTAATGATTCCTGTTTCCTCCCTTTTCAGTCATCATCCGTTTGCA
CUST_49570_PI429285431	2.72e-05	0.469292	lncRNA		CUST_49577_PI429285431	CUST_49577_PI429285431	FALSE	lncRNA	hg19_lincRNAsTranscripts_TCONS_l2_00024930 range=chr6:134851906-134861080 5'pad=0 3'pad=0 strand=- repeatMasking=none		UCSC	-				chr6	134851906	134852246	-	intergenic					TTGTGAGTATCTTGCTTCCTTCCCCAATGCCTCTTCAAACCACTTTGTCAAAAACAACAA
CUST_21682_PI429285431	4.6e-09	0.450582	lncRNA		CUST_21682_PI429285431	CUST_21682_PI429285431	FALSE	lncRNA	lnc-ASTE1-1:2		lncipedia2.1	-				chr3	130791074	130791744	-	intronic_antisense	NEK11	+	79858	NIMA (never in mitosis gene a)- related kinase 11 (EC:2.7.11.1)	TCCCATTGGCCCTTCTAATAGAGCTATTGGCATTCACATCCTATTTTCAGCCCAAATGTC
CUST_3491_PI429285431	0.000553414	0.436379	lncRNA		CUST_34910_PI429285431	CUST_34910_PI429285431	FALSE	lncRNA_mRNA	n341827|AK124760|mRNAlikelncRNA|Homosapiens|HumanlncRNA|JounralRNA|4306|NULL|-1.2276700|-0.4367900		NONCODERv3	gi|148727287|ref|NM_002336.2|				chr12	12271962	12272806	-	exonic_sense	LRP6	-	4040	low density lipoprotein receptor-related protein 6	GGTCAGCCCTTGTCCACTTATTCACTTCCCTCCTTTTGTAAAATAAGTGCTTTAATTATA
CUST_38537_PI429285431	7.62e-05	0.495838	lncRNA		CUST_3853_PI429285431	CUST_3853_PI429285431	FALSE	lncRNA	"transcript_id ""ENST00000600308.1"" | genecode_v17"		gencode_v17	-				chr11	6223131	6224483	-	intergenic					CAGAGGGGAAAGGCAAAAAATGGTATACCTGTATGTATGTGAGACGCAGGATTATCATAC
CUST_51372_PI429285431	7.52e-07	0.456777	lncRNA		CUST_513_PI429285431	CUST_513_PI429285431	FALSE	lncRNA	"transcript_id ""ENST00000444887.1"" | genecode_v17"		gencode_v17	-				chr1	187412738	187413027	+	intergenic					GAGAAGAAAGAACACTCAGATGTGCCCTGGAGACTTTCCTTTTATTTTTAAACAGTTTTT
CUST_26201_PI429285431	7.62e-08	0.357173	lncRNA		CUST_26201_PI429285431	CUST_26201_PI429285431	FALSE	lncRNA	lnc-GLRB-2:1		lncipedia2.1	-				chr4	157763183	157763449	+	intronic_antisense	PDGFC	-	56034	platelet derived growth factor C	AATGTCAATAATATTGAAATTGGTCATTTTGTTTCTCCCACAGCTTGTGCTCTGGGGCAA
CUST_35847_PI429285431	1.85e-06	0.493884	lncRNA		CUST_35884_PI429285431	CUST_35884_PI429285431	FALSE	lncRNA	n344546|NULL|lincRNA|Homosapiens|HumanlincRNA|ScriptureReconstructionLincRNAsByLuo[unpublished]|linc_luo_94|NULL|-1.8055400|-0.1645328		NONCODERv3	-				chr5	173205290	173205645	+	intergenic					GAAAAGCCTCTTCAAACTGGAGCTCCAGGTGATGGTTGTCATCTGTCGATGTTGCTCTCT
CUST_36331_PI429285431	4.83e-06	0.439037	lncRNA		CUST_36331_PI429285431	CUST_36331_PI429285431	FALSE	lncRNA	n344858|NULL|lincRNA|Homosapiens|HumanlincRNA|ScriptureReconstructionLincRNAsByLuo[unpublished]|linc_luo_407|NULL|-1.2825600|-0.3254441		NONCODERv3	-				chr5	149866542	149867263	-	intergenic					TGAATATAAGCATGACACCATTTACTGAAATACCACACACTCCTCTCATCCTCATTCTAG
CUST_27907_PI429285431	0.00111435	0.420732	lncRNA		CUST_27907_PI429285431	CUST_27907_PI429285431	FALSE	lncRNA	n325147|NULL|mRNAlikelncRNA|Homosapiens|vegalncRNA|GENCODE|OTTHUMT00000330898|http://vega.sanger.ac.uk/Homo_sapiens/Transcript/Summary?db=core;t=OTTHUMT00000330898|-1.0914800|-0.4289913		NONCODERv3	-				chr2	126185015	126185682	+	intergenic					AGACAGAATTAAGCCCTTGCTTCTTGGTTCTCCATAGTGCTGTACTCATGCCTCTATTTT
LNCA_33_P3223631	2e-05	0.409347	lncRNA	LOC100288292
LNCA_21_P0014823	1.38e-06	0.449801	lncRNA	LOC100287160
CUST_34923_PI429285431	2.82e-06	2.34373	lncRNA		CUST_34923_PI429285431	CUST_34923_PI429285431	FALSE	lncRNA	n341840|AK095308|mRNAlikelncRNA|Homosapiens|HumanlncRNA|JounralRNA|4319|NULL|-1.1313300|-0.3603212		NONCODERv3	-				chr12	14889902	14892616	-	intergenic					CACAAATCTAAGGATCACTCTGAGCCACAGTTTCTTTATCCTATTCTGAAATCTCTTTAA
CUST_28406_PI429285431	4.63e-08	3.14629	lncRNA		CUST_28406_PI429285431	CUST_28406_PI429285431	FALSE	lncRNA	n325727|NULL|mRNAlikelncRNA|Homosapiens|vegalncRNA|GENCODE|OTTHUMT00000331673|http://vega.sanger.ac.uk/Homo_sapiens/Transcript/Summary?db=core;t=OTTHUMT00000331673|-0.4540510|-0.3068087		NONCODERv3	-				chr13	50557560	50557990	-	intergenic					TGAAGATTAAGGAAGCAGAGACAAGGAGTATGAACAATTCTTTCTGGAAGAATGATGGGG
CUST_27822_PI429285431	3.26e-09	0.422913	lncRNA		CUST_27822_PI429285431	CUST_27822_PI429285431	FALSE	lncRNA	n325050|NULL|mRNAlikelncRNA|Homosapiens|vegalncRNA|GENCODE|OTTHUMT00000078204|http://vega.sanger.ac.uk/Homo_sapiens/Transcript/Summary?db=core;t=OTTHUMT00000078204|-0.9389340|-0.3202252		NONCODERv3	-				chr20	19686351	19686637	+	intronic_sense	SLC24A3	+	57419	"solute carrier family 24 (sodium/potassium/calcium exchanger), member 3"	TAAAAGTCAAAGTTTGGAAAATGAGCACTTATCTCCTCCCTGCTATCCTTTCTCCCTACA
CUST_25068_PI429285431	6.57e-08	2.32955	lncRNA		CUST_25068_PI429285431	CUST_25068_PI429285431	FALSE	lncRNA	lnc-MGAT1-1:1		lncipedia2.1	-				chr5	180211782	180214781	-	intergenic					GTCATCTAGGAGACTGGTTCTATTATTTACGTAGATGTTCTTGAATTAAAGGATGGGAAT
CUST_51908_PI429285431	3.71e-07	2.64503	lncRNA		CUST_51908_PI429285431	CUST_51908_PI429285431	FALSE	lncRNA	hg19_lincRNAsTranscripts_TCONS_l2_00012781 range=chr19:59086812-59100923 5'pad=0 3'pad=0 strand=+ repeatMasking=none		UCSC	-				chr19	59086812	59087503	+	intergenic					CTTCAAAAACCAAACCTGTTTGTGAGATCTCCTTCAAATACTACTGTAGACCCCAGTGTT
CUST_23500_PI429285431	2.25e-08	2.68599	lncRNA		CUST_23500_PI429285431	CUST_23500_PI429285431	FALSE	lncRNA	lnc-FRY-1:1		lncipedia2.1	-				chr13	32872592	32873028	+	intergenic					TATCACTCTAATAAGGTGATATCTGAGGAGAGATCTGAATGAAGTGAGGATACAATGGAT
CUST_20096_PI429285431	3.14e-07	0.482358	lncRNA		CUST_20096_PI429285431	CUST_20096_PI429285431	FALSE	lncRNA	lnc-PIPOX-2:1		lncipedia2.1	-				chr17	27482229	27482551	+	intronic_antisense	MYO18A	-	399687	myosin XVIIIA	TTGCAACAAGGCTCTGGGGACATCCACATCTGGCCTTTCCTACAGCACAGAGCTCTGCCT
CUST_6947_PI429285431	0.000133217	0.428645	lncRNA		CUST_6947_PI429285431	CUST_6947_PI429285431	FALSE	lncRNA	"transcript_id ""ENST00000450776.1"" | genecode_v17"		gencode_v17	-				chr22	23668803	23669148	+	intergenic					GAGACCTCTTCTCCCGATAAATGCCCCTTTTCTCTCCTTAATATATTATCTTGCTTACAA
CUST_9081_PI429285431	1.11e-07	0.484798	lncRNA		CUST_9081_PI429285431	CUST_9081_PI429285431	FALSE	lncRNA	lnc-EIF4E1B-1:1		lncipedia2.1	-				chr5	176059233	176061921	+	intronic_sense	EIF4E1B	+	253314	eukaryotic translation initiation factor 4E family member 1B	TAAAAAAGATAAGAAAAAGGAGGCTGTCTGCTTTCATCACTGCACTGGTCCCTGGCCTTT
CUST_39327_PI429285431	1.96e-05	3.01626	lncRNA		CUST_39328_PI429285431	CUST_39328_PI429285431	FALSE	lncRNA	n386383|NULL|lncRNA|Homosapiens||UCSCGeneNoncode|uc010ixj.1||-0.2729870|-0.2759580		NONCODERv3	-				chr5	68914139	68914502	+	intergenic					ATTCTGGGGGAGAACATTTTGTGAATTCCTGGGTCCAGAGAGAATTACCTATGGCATCAG
LNCA_19_P00322545	4.47e-05	0.466768	lncRNA	XLOC_007868	LNCA_19_P00807643	LNCA_19_P00807643	FALSE	lncRNA	NR_027252	NR_027252	Agilent_HUMAN_G3V2	-	CYP1B1-AS1			chr2	38408887	38408946	+	intergenic					TACTTCACCGATGTCAGCATTTTACCCAGAGCCATTCCAAGGTGACCATAACTCACTTAA
CUST_11435_PI429285431	0.000235647	0.37303	lncRNA		CUST_11452_PI429285431	CUST_11452_PI429285431	FALSE	lncRNA	lnc-RP11-1220K2.2.1-1:2		lncipedia2.1	-				chr7	141919670	141922669	+	intergenic					CCCAGCACTCAAATGGTTTCTATACCAACAGTTATTGATATTACAGGAGAGTATGTAATT
CUST_23309_PI429285431	6.83e-06	0.477158	lncRNA		CUST_23309_PI429285431	CUST_23309_PI429285431	FALSE	lncRNA	lnc-TUFM-3:1		lncipedia2.1	-				chr16	28833004	28833543	-	bidirectional	ATXN2L	+	11273	ataxin 2-like	AAAGGTCATCATGTCTCCTGGGTTCCCTAACAAACACAGTCCAGCTTTTTCCTGGCATTA
CUST_23693_PI429285431	6.21e-11	0.473796	lncRNA		CUST_23693_PI429285431	CUST_23693_PI429285431	FALSE	lncRNA	lnc-ACP2-2:1		lncipedia2.1	-				chr11	47293627	47294048	-	intronic_antisense	MADD	+	8567	MAP-kinase activating death domain	GATTGCAGAAAGATGAAATGGTGTTCTCTCTCCAGCAAGTCAATTTTGAAATATCAAGTT
CUST_40470_PI429285431	2.08e-07	0.483293	lncRNA		CUST_40470_PI429285431	CUST_40470_PI429285431	FALSE	lncRNA	n409400|NR_033799|lncRNA|Homosapiens||RefGeneNoncode|NR_033799||-0.7589610|-0.2179498		NONCODERv3	-				chr17	1524912	1525498	+	intronic_antisense	SLC43A2	-	124935	"solute carrier family 43, member 2"	TTAAGACCCTTATATGATTCTTCCTAAGGTGTGCGATGCCCTCCATGATATGAGACCAGC
LNCA_33_P3362397	6.39e-07	2.5458	lncRNA	FLJ45340
CUST_7477_PI429285431	1.47e-06	0.483811	lncRNA		CUST_7477_PI429285431	CUST_7477_PI429285431	FALSE	lncRNA	lnc-AL590822.1-2:1		lncipedia2.1	-				chr1	2166695	2168498	-	intronic_antisense	SKI	+	6497	v-ski sarcoma viral oncogene homolog (avian)	TGACGTGAGCTGCACATCCACTGCCCAGCCATGTTTACTCTTCTGCCTCCTGTAGACGCA
LNCA_21_P0005644	4.61e-06	0.47926	lncRNA	XLOC_006686	LNCA_21_P0009323	LNCA_21_P0009323	FALSE	lncRNA			Agilent_HUMAN_G3V2	-	XLOC_012467			chr17	38276831	38276890	-	intergenic					TTCTCTGGCCTGATGTGAAAACCTCTCATTAAAACTGTGTCTGTGCTTTGTGGGCTGAAA
CUST_50328_PI429285431	2.4e-07	2.86108	lncRNA		CUST_50328_PI429285431	CUST_50328_PI429285431	FALSE	lncRNA	hg19_lincRNAsTranscripts_TCONS_l2_00029053 range=chr9:132045109-132048007 5'pad=0 3'pad=0 strand=+ repeatMasking=none		UCSC	-				chr9	132045109	132045556	+	intergenic					CAGATTCTCTCCAAACCTTTGTGAATGAATGAAGGATGACGTCACTAGAATCCATCCCTG
CUST_15043_PI429285431	8.96e-09	0.469024	lncRNA		CUST_15043_PI429285431	CUST_15043_PI429285431	FALSE	lncRNA	lnc-PTPRD-3:1		lncipedia2.1	-				chr9	11194276	11194681	-	intergenic					TATATTCCACAGACCTCAACACAGGTGGCCGTTCTTCCTCTTCCTAAGTCAGAAAATTTG
CUST_40809_PI429285431	3.39e-10	6.24326	lncRNA		CUST_40809_PI429285431	CUST_40809_PI429285431	FALSE	lncRNA	n410578|NR_037846|lncRNA|Homosapiens||RefGeneNoncode|NR_037846||0.2812970|-0.2672888		NONCODERv3	-				chr6	2993298	2996297	+	intergenic					TATGGATAGTTGGAGGGAGGGGACAGAGGATGCGTCTTCTATCAAGTTATATTTCTAGTT
CUST_17361_PI429285431	1.62e-10	0.408993	lncRNA		CUST_17361_PI429285431	CUST_17361_PI429285431	FALSE	lncRNA	lnc-RETNLB-1:2		lncipedia2.1	-				chr3	108463130	108463435	-	intergenic					TAAAGAGAAGGTGGCAGGTATCAAAGGCAGGTGGTGACTCTTCCTATTGCTTTCTGATGT
LNCA_33_P3283001	0.00390167	2.11234	lncRNA	LOC728093
LNCA_21_P0013947	6.94e-08	0.399349	lncRNA	LOC100287526
CUST_21391_PI429285431	6.64e-06	0.454012	lncRNA		CUST_21391_PI429285431	CUST_21391_PI429285431	FALSE	lncRNA	lnc-SLC4A3-1:1		lncipedia2.1	-				chr2	220578979	220579474	+	intergenic					GTGAATAGAGAGAGAGGGAACAGGGAAATATCTAGATCTGTGTGCTGATACCACTTTTTT
CUST_51639_PI429285431	0.00154637	0.305749	lncRNA		CUST_51639_PI429285431	CUST_51639_PI429285431	FALSE	lncRNA	hg19_lincRNAsTranscripts_TCONS_l2_00011289 range=chr17:43663236-43675927 5'pad=0 3'pad=0 strand=- repeatMasking=none		UCSC	-				chr17	43663236	43664609	-	intergenic					TGTCCTCCCCACATAGCTAGAGTGAATGAACTAAAAAAGAGAGAGAACACACACAGCCCA
CUST_8098_PI429285431	5.04e-07	0.395248	lncRNA		CUST_80_PI429201921	CUST_80_PI429201921	FALSE	lncRNA	TC01005046.hg.1		Affy_HUMAN_HTA2.0	-				chr1	221681900	221684321	+	intergenic					TAATTTTCTACCATACTGATAGGCCCACTGATGAACCTTTACAGTCCTCCTCTTTGAGCC
LNCA_21_P0004484	1.64e-06	0.488258	lncRNA	LOC255167	LNCA_21_P0007470	LNCA_21_P0007470	FALSE	lncRNA			Agilent_HUMAN_G3V2	-	XLOC_009582			chr11	121908932	121934927	-	intergenic					TGTCCACTCCCACACAAACCAGCTTCAGGCCTTTTTCAAGAGTGCAGGAAATTCTACCCC
CUST_14667_PI429285431	0.0028118	0.429849	lncRNA		CUST_14667_PI429285431	CUST_14667_PI429285431	FALSE	lncRNA	lnc-PIEZO2-4:1		lncipedia2.1	-				chr18	10409720	10410587	-	intergenic					ATATCAACGTCCTCCCCACATACTCTTCATTCCCTGGGAGAATAACTACTGGAGAAAAAA
CUST_35009_PI429285431	1.79e-05	0.42501	lncRNA		CUST_35014_PI429285431	CUST_35014_PI429285431	FALSE	lncRNA	n341948|CR619980|mRNAlikelncRNA|Homosapiens|HumanlncRNA|JounralRNA|4429|NULL|-0.3191120|-0.3214890		NONCODERv3	-				chr12	65103237	65104292	+	intergenic					TCAGTCTCACCAGCAGGTGATCATGAAATCTTCCTCTCAAAGACTAAGATTTAGAATTGT
CUST_49954_PI429285431	2.12e-05	2.82056	lncRNA		CUST_49994_PI429285431	CUST_49994_PI429285431	FALSE	lncRNA	hg19_lincRNAsTranscripts_TCONS_l2_00027747 range=chr8:49277962-49337122 5'pad=0 3'pad=0 strand=+ repeatMasking=none		UCSC	-				chr8	49277962	49278242	+	intergenic					TTTCGACAAGGCTTTCCCTCCTCTGTTGAACTGTTTTGCTCCTTCGTCAGAAGTTAACTG
CUST_27546_PI429285431	2.76e-07	0.365016	lncRNA		CUST_27546_PI429285431	CUST_27546_PI429285431	FALSE	lncRNA	n324732|NULL|mRNAlikelncRNA|Homosapiens|vegalncRNA|GENCODE|OTTHUMT00000319066|http://vega.sanger.ac.uk/Homo_sapiens/Transcript/Summary?db=core;t=OTTHUMT00000319066|-1.1657600|-0.3007196		NONCODERv3	-				chr22	18725316	18725642	+	intergenic					TTAGGTCAAATTTTACCCAGAGCTGGTACAGCCACTGCCGATTCTTAGCCAGACCTTATT
CUST_52028_PI429285431	1.85e-07	0.346089	lncRNA		CUST_52028_PI429285431	CUST_52028_PI429285431	FALSE	lncRNA	hg19_lincRNAsTranscripts_TCONS_l2_00016979 range=chr21:17998030-18013444 5'pad=0 3'pad=0 strand=+ repeatMasking=none		UCSC	-				chr21	17998030	17999856	+	intergenic					CTTGTTTATGATAGTCACCAGCTATAACAGACACTGCCTGATGCCTTTCCAATATCCACT
CUST_49738_PI429285431	1.07e-06	2.66302	lncRNA		CUST_49739_PI429285431	CUST_49739_PI429285431	FALSE	lncRNA	hg19_lincRNAsTranscripts_TCONS_l2_00025813 range=chr7:39830829-39834662 5'pad=0 3'pad=0 strand=+ repeatMasking=none		UCSC	-				chr7	39830829	39833415	+	intergenic					TTTCTTAAAAAGTACAGCTTAAGTTGGGAGTGCAGAGGGAATGGGGAGAAAACCCTCCCA
LNCA_33_P3327444	2.46e-07	2.57532	lncRNA	BACH1
CUST_11944_PI429285431	2.71e-05	0.443923	lncRNA		CUST_11948_PI429285431	CUST_11948_PI429285431	FALSE	lncRNA	lnc-KY-1:1		lncipedia2.1	-				chr3	134299345	134300287	-	intergenic					GGAGAGAATTTAAGGGGGCTTACATGTAAAAGTCATTGCATTTCTCTGCAATATGTAATT
CUST_25861_PI429285431	2.07e-07	0.310531	lncRNA		CUST_25861_PI429285431	CUST_25861_PI429285431	FALSE	lncRNA	lnc-RP11-148O21.2.1-1:1		lncipedia2.1	-				chr8	11417293	11417886	-	intronic_antisense	BLK	+	640	B lymphoid tyrosine kinase (EC:2.7.10.2)	TTCATAGAAATGACATTACGCTTGAGCCATGGATGATGATAAGGATTCTGCCAGCCTGCC
CUST_36859_PI429285431	7.36e-11	0.342871	lncRNA		CUST_36859_PI429285431	CUST_36859_PI429285431	FALSE	lncRNA	n345327|NULL|lincRNA|Homosapiens|HumanlincRNA|ScriptureReconstructionLincRNAsByLuo[unpublished]|linc_luo_876|NULL|-1.5629300|-0.1503847		NONCODERv3	-				chr16	11720927	11721504	-	intergenic					ACATCTCCTGTAAATACCCCGTGTCTTTGTGCTACCCAGAGCCCGAGTCTGGCCCCATGT
CUST_12108_PI429285431	3.88e-06	0.322612	lncRNA		CUST_12108_PI429285431	CUST_12108_PI429285431	FALSE	lncRNA	lnc-CAP2-1:1		lncipedia2.1	-				chr6	17358918	17359869	+	intergenic					TTGTCTCCTGGCTTCTAATGTTGCAGTGAAGAAGTCAGCTACAAATCTAATTGCCGTTTC
CUST_25373_PI429285431	2.34e-07	2.66414	lncRNA		CUST_25373_PI429285431	CUST_25373_PI429285431	FALSE	lncRNA	lnc-IL15RA-1:3		lncipedia2.1	-				chr10	5987618	5988127	-	intergenic					CGACCCCATTATGTGTGTGTGAGGCTGATTAAAGTGTTACCTGTCACCAGGTGTCGCCAA
CUST_19622_PI429285431	1.74e-05	0.471468	lncRNA		CUST_19622_PI429285431	CUST_19622_PI429285431	FALSE	lncRNA	lnc-AC135050.1-1:1		lncipedia2.1	-				chr16	31080152	31080655	+	intronic_antisense	ZNF668	-	79759	zinc finger protein 668	ATCATGAGACTTCCCACTGCTCCCAGGAAAAAGACCAATATCTTTTCCATGGCCAGCATA
CUST_51263_PI429285431	8.7e-06	2.17113	lncRNA		CUST_51263_PI429285431	CUST_51263_PI429285431	FALSE	lncRNA	hg19_lincRNAsTranscripts_TCONS_l2_00008487 range=chr15:28983496-28984317 5'pad=0 3'pad=0 strand=+ repeatMasking=none		UCSC	-				chr15	28983496	28983772	+	intergenic					GGAAACCACAGGGGAGTTTCAGGCCAGTCAGCTTTTCATCTTCAACTTTATAACTTTCAC
CUST_13113_PI429285431	2.24e-06	0.416098	lncRNA		CUST_13139_PI429285431	CUST_13139_PI429285431	FALSE	lncRNA	lnc-QPCT-1:2		lncipedia2.1	-				chr2	37553620	37553981	+	intergenic					CACTGTTCTGCTTCTCTTTTTAAAAATAAAGCGGTCTCCTCCACTTTGGGTAAATCTTTC
CUST_17758_PI429285431	6.48e-06	0.392137	lncRNA		CUST_17758_PI429285431	CUST_17758_PI429285431	FALSE	lncRNA	lnc-ITGA4-1:1		lncipedia2.1	-				chr2	182549983	182550617	+	intergenic					TGAGAAAGAAGCAAGCAAACAAAAATCCTCGGTAGCTGTGTGTAGCTTCAGGAGTGGAGA
CUST_48792_PI429285431	1e-07	0.424527	lncRNA		CUST_48792_PI429285431	CUST_48792_PI429285431	FALSE	lncRNA	hg19_lincRNAsTranscripts_TCONS_l2_00015126 range=chr2:220769045-220769635 5'pad=0 3'pad=0 strand=- repeatMasking=none		UCSC	-				chr2	220769045	220769500	-	intergenic					TGATTTGATTTGATTTCTACTAGTCAAGTGGGCACCTGGATTAAGCAGACTCTCCCCCAG
CUST_48567_PI429285431	2.14e-05	0.364018	lncRNA		CUST_48567_PI429285431	CUST_48567_PI429285431	FALSE	lncRNA	hg19_lincRNAsTranscripts_TCONS_l2_00013422 range=chr2:741967-749843 5'pad=0 3'pad=0 strand=+ repeatMasking=none		UCSC	-				chr2	741967	742369	+	intergenic					TGAGAAAGGGAACGTGAGAATTAGGTCAACCAGAGTGTTTTCCCAGTAAGTGTTGAGGCA
CUST_33187_PI429285431	7.86e-05	0.437785	lncRNA		CUST_33191_PI429285431	CUST_33191_PI429285431	FALSE	lncRNA	n339884|CR608159|mRNAlikelncRNA|Homosapiens|HumanlncRNA|JounralRNA|2332|NULL|-1.0980700|-0.3778103		NONCODERv3	-				chr18	52394574	52396090	+	intergenic					AAGTTTTTGTTATCTTTTACTCTTGCCCCCCTCAGCTAGAAAGACAATCTCAGACCCTGA
CUST_26474_PI429285431	8.8e-07	0.36177	lncRNA		CUST_26474_PI429285431	CUST_26474_PI429285431	FALSE	lncRNA	lnc-GPRC5A-1:1		lncipedia2.1	-				chr12	13116212	13116580	+	intergenic					CCATTTATTTACTCTTAGACTCTCTCCCTAGAAATGTATCGTTAGTGTTCATTCATCTGC
LNCA_33_P3323368	1.24e-05	2.01502	lncRNA	FLJ39639
CUST_1356_PI429285431	1.35e-09	0.322207	lncRNA		CUST_1356_PI429285431	CUST_1356_PI429285431	FALSE	lncRNA	"transcript_id ""ENST00000472243.2"" | genecode_v17"		gencode_v17	-				chr3	55644631	55645183	+	intronic_antisense	ERC2	-	26059	ELKS/RAB6-interacting/CAST family member 2	GAAAAGAAAGCTCTTTCTACATCTGCAAGGCTGATTCATTTTTCTCCCTTCCAAGAACTC
CUST_2312_PI429285431	2.87e-07	0.197448	lncRNA		CUST_23121_PI429285431	CUST_23121_PI429285431	FALSE	lncRNA	lnc-NUB1-1:3		lncipedia2.1	-				chr7	151108756	151109299	+	intergenic					GCTGACCTTACCTACTTCCTCTTTCCAGGTTGATAGATTTTTTGTTCTTGGCTTCTCCAC
CUST_13653_PI429285431	1.02e-05	0.408968	lncRNA		CUST_13653_PI429285431	CUST_13653_PI429285431	FALSE	lncRNA	lnc-IFT74-3:4		lncipedia2.1	-				chr9	25812619	25814148	+	intergenic					TGCCATAAACATAAACCAAACACTTCCACTAGAAATGCTGACCAATGCCTGGATTCTCTG
LNCA_21_P0010423	4.37e-10	0.387292	lncRNA	XLOC_014272	LNCA_21_P0014558	LNCA_21_P0014558	FALSE	lncRNA	XR_110298	XR_110298	Agilent_HUMAN_G3V2	-	LOC100506767			chr14	62600877	62600936	-	intergenic					CCCACCTCCCCTACTTAACAAAGGCACCTATATTTCACCAGAAATAAAATTTTATTAGTA
CUST_11483_PI429285431	1.23e-12	0.38973	lncRNA		CUST_114_PI429285431	CUST_114_PI429285431	FALSE	lncRNA	"transcript_id ""ENST00000416385.1"" | genecode_v17"		gencode_v17	-				chr1	680193	682052	-	intergenic					CCTTGTCAAATAGTTTGGAACAGGTATAATGATCACAATAACCCCAAGCATAATATTTCG
CUST_51950_PI429285431	4.23e-09	0.465003	lncRNA		CUST_51950_PI429285431	CUST_51950_PI429285431	FALSE	lncRNA	hg19_lincRNAsTranscripts_TCONS_l2_00016540 range=chr20:25755648-25762747 5'pad=0 3'pad=0 strand=- repeatMasking=none		UCSC	-				chr20	25755648	25756024	-	intergenic					TTCGGAAGGTATCCGCTACATCCTCCATAGCCGTGTATCCCTGCCCAGGGCAATCTTCTG
CUST_16877_PI429285431	2.38e-06	0.46624	lncRNA		CUST_168_PI429201921	CUST_168_PI429201921	FALSE	lncRNA	TC19002350.hg.1		Affy_HUMAN_HTA2.0	-				chr19	14192336	14196579	-	exonic_sense	C19orf67	-	646457	chromosome 19 open reading frame 67	ATTCTAATATGCTAGCTTCTTCCACTGTCTCCCTCTGGCTCCTAGCGCTTGTAATTTTGC
CUST_39940_PI429285431	1.3e-05	2.04113	lncRNA		CUST_39940_PI429285431	CUST_39940_PI429285431	FALSE	lncRNA	n406883|NR_024368|lncRNA|Homosapiens||RefGeneNoncode|NR_024368||3.6335100|-0.1460730		NONCODERv3	-				chr7	128290294	128291556	+	intergenic					AAAGGAAACAGGAAGGATAGATTTGGGGCCAATTATATTACTGTTTGGGTTTTTGTTACT
CUST_35050_PI429285431	1.19e-09	2.35588	lncRNA		CUST_35071_PI429285431	CUST_35071_PI429285431	FALSE	lncRNA	n342024|AK130978|mRNAlikelncRNA|Homosapiens|HumanlncRNA|JounralRNA|4505|NULL|-0.4921320|-0.1071798		NONCODERv3	-				chr12	115110665	115111133	-	intronic_sense	TBX3	-	6926	T-box 3	ATCATGCTGGACGATTTCTTTGTCTCTGTTTATAACAAATGCCCTTTTTCCCTCCCCCAG
CUST_26694_PI429285431	1.32e-11	0.469946	lncRNA		CUST_26694_PI429285431	CUST_26694_PI429285431	FALSE	lncRNA	n1114|AF222983|DISC2RNA|Homosapiens|DISC2|NONCODEv2.0|n1114|NULL|-1.5906100|-0.3279822		NONCODERv3	-				chr1	231951705	231954704	+	exonic_sense	DISC1	+	27185	disrupted in schizophrenia 1	AGATCTTCCATGTGTGTGGATGCTGTAAAGCTTGTTTTCCCTTCTTCTCTCCCACAACGT
LNCA_19_P00322673	1.42e-07	0.304268	lncRNA	XLOC_l2_013314	LNCA_19_P00810748	LNCA_19_P00810748	FALSE	lncRNA	NR_026999	NR_026999	Agilent_HUMAN_G3V2	-	LINC00265	long intergenic non-protein coding RNA 265		chr7	39773280	39773339	+	intergenic					TTTTCTCAACACGGCCTCCTAGTCTCCTTCCCGCTTGGGCATCTGTTTTTCTTATATAGA
CUST_6666_PI429285431	1.11e-06	0.473462	lncRNA		CUST_6666_PI429285431	CUST_6666_PI429285431	FALSE	lncRNA	"transcript_id ""ENST00000437696.1"" | genecode_v17"		gencode_v17	-				chr20	22664300	22664864	-	intergenic					AAATATTAGCAGCCGTTACCATTGGAGCCTCTGCCTCCTAAACCTGCCTCAATATCTATG
LNCA_21_P0013113	1.85e-07	2.22426	lncRNA	XLOC_l2_013189	LNCA_33_P3364637	LNCA_33_P3364637	FALSE	lncRNA_mRNA	XR_109540	XR_109540	Agilent_HUMAN_G3V2	ENST00000378108				chr19	42747357	42747416	+	bidirectional	GSK3A	-	2931	glycogen synthase kinase 3 alpha (EC:2.7.11.26)	ACAGCGAGCCCTGGTGTGTTCTGGGAAATGGAGTTCGACGTATCCTCCCCATTGACTGAG
LNCA_19_P00320906	1.15e-06	0.407125	lncRNA	LOC283033	LNCA_19_P00322671	LNCA_19_P00322671	FALSE	lncRNA	NR_026949	NR_026949	Agilent_HUMAN_G3V2	-	LINC00277	long intergenic non-protein coding RNA 277		chr15	69373449	69373508	+	intergenic					GGTGTCTCCTACTTTTACTAAAAATGGAATTTGTGTTTTTATCGCTCAAGTCCTTTTTGC
CUST_24507_PI429285431	3.13e-05	0.499284	lncRNA		CUST_24517_PI429285431	CUST_24517_PI429285431	FALSE	lncRNA	lnc-CA12-1:1		lncipedia2.1	-				chr15	63761505	63762119	-	intergenic					TTTGCCTACTCTGCTGCATCTACACAGTCAGATGTGATTTGGGTTAAAGTTCATTGAATC
CUST_27607_PI429285431	4.04e-07	0.478448	lncRNA		CUST_27607_PI429285431	CUST_27607_PI429285431	FALSE	lncRNA	n324811|NULL|mRNAlikelncRNA|Homosapiens|vegalncRNA|GENCODE|OTTHUMT00000141032|http://vega.sanger.ac.uk/Homo_sapiens/Transcript/Summary?db=core;t=OTTHUMT00000141032|1.5746900|-0.2886780		NONCODERv3	-				chr21	34225333	34228332	+	intergenic					TGAGTGTTTTGCATTTTCGTTTCCTCTCTTGTACTGTCAGCCTGGCTTCTGTTAGCACTC
LNCA_21_P0014730	3.32e-08	2.14731	lncRNA	LOC100505932
CUST_10438_PI429285431	2.33e-07	2.72191	lncRNA		CUST_10438_PI429285431	CUST_10438_PI429285431	FALSE	lncRNA	lnc-ARRDC3-1:6		lncipedia2.1	-				chr5	90609897	90612896	-	intergenic					ACCAGAGGAGGCCTCTTCTGAACTAGGTAGAGGTCCTGAGAATTGATTCTGAGAGTAAAA
CUST_307_PI429201921	4.71e-07	0.466255	lncRNA		CUST_30743_PI429285431	CUST_30743_PI429285431	FALSE	lncRNA	n336311|Y18488|mRNAlikelncRNA|Homosapiens|NULL|H-invitationalv7.5|HIT000326090_11|http://h-invitational.jp/hinv/spsoup/transcript_view?hit_id=HIT000326090_11|-0.9396300|-0.3141691		NONCODERv3	-				chr6	2885779	2886017	+	intergenic					GTAATTTATATGCTTAATGTCATGCTAATCCTTCCTCCCAAAAAATTGAAAGTTAAAAAA
CUST_23701_PI429285431	4.79e-10	5.80753	lncRNA		CUST_23716_PI429285431	CUST_23716_PI429285431	FALSE	lncRNA	lnc-SAMD14-1:1		lncipedia2.1	-				chr17	48179217	48179646	-	intronic_antisense	PDK2	+	5164	"pyruvate dehydrogenase kinase, isozyme 2 (EC:2.7.11.2)"	TTGTAAAGTGAGTTCTGCTCTCCCACAGACTTGCACCATGAACTTGGAAATCTCTGACTC
LNCA_33_P3285271	0.00901949	0.473538	lncRNA	FMO6P
CUST_31917_PI429285431	3.87e-06	0.375079	lncRNA		CUST_31917_PI429285431	CUST_31917_PI429285431	FALSE	lncRNA	n338472|BC038465|mRNAlikelncRNA|Homosapiens|HumanlncRNA|JounralRNA|869|NULL|-1.0396300|-0.2581046		NONCODERv3	-				chr14	97925206	97926344	+	intergenic					GCCTCTCCTGAAGAAAATAGTGGCAATTTGTACTCAGCTGTGGAATAAAGGAAATCATGA
CUST_24432_PI429285431	6.67e-05	0.490744	lncRNA		CUST_24458_PI429285431	CUST_24458_PI429285431	FALSE	lncRNA_mRNA	lnc-FAM72A-2:1		lncipedia2.1	"ENST00000367134,ENST00000367135,ENST00000340781"				chr1	205904736	205904965	+	exonic_antisense	SLC26A9	-	115019	"solute carrier family 26, member 9"	GAAGTTTCTCTCCCACTGGGTATGTCCGGTCCTTCTTCTCAAACTCATCGTCGAAGAGGG
CUST_3975_PI429285431	0.013063	2.16591	lncRNA		CUST_3975_PI429285431	CUST_3975_PI429285431	FALSE	lncRNA	"transcript_id ""ENST00000501122.2"" | genecode_v17"		gencode_v17	-				chr11	65196269	65199268	+	intergenic					CTGTTGTGAGTATATGATATCCATTTCCCTACATAGCCACTAACATCAGGTTTTTACAAT
CUST_6338_PI429285431	3.85e-08	0.480125	lncRNA		CUST_6338_PI429285431	CUST_6338_PI429285431	FALSE	lncRNA	"transcript_id ""ENST00000593554.1"" | genecode_v17"		gencode_v17	-				chr19	12793507	12794141	-	intergenic					ATGGGCGAGTGCCGGGCCAAGCAGTGGGTCTCCAGCAGGTGGCATTAAAATAGGAATTTT
LNCA_21_P0013193	6.89e-07	2.8877	lncRNA	LINC00174	LNCA_33_P3365408	LNCA_33_P3365408	FALSE	lncRNA	NR_026947	NR_026947	Agilent_HUMAN_G3V2	-	MATL2963	uncharacterized LOC283314		chr12	7271213	7271272	+	intergenic					GACAGAATCGTGTGGGATATGCACACTTGCGTGGAAGAAAAACTGTTCCATTCACATTGA
CUST_28393_PI429285431	8.44e-08	0.43899	lncRNA		CUST_28393_PI429285431	CUST_28393_PI429285431	FALSE	lncRNA	n325711|NULL|mRNAlikelncRNA|Homosapiens|vegalncRNA|GENCODE|OTTHUMT00000045191|http://vega.sanger.ac.uk/Homo_sapiens/Transcript/Summary?db=core;t=OTTHUMT00000045191|-0.8104060|-0.2730770		NONCODERv3	-				chr13	62144418	62144850	-	intergenic					GTTATTGAAAGAGTCATATGTGGTTGCTTCTTCCTCATAGCCTGTCTGCTCTTTGTAAAG
CUST_3200_PI429285431	2.75e-06	0.415836	lncRNA		CUST_3200_PI429285431	CUST_3200_PI429285431	FALSE	lncRNA	"transcript_id ""ENST00000517365.1"" | genecode_v17"		gencode_v17	-				chr8	80732804	80733301	-	intergenic					TCCTACCCATTGGCTCAGATGGTTCCAGCTTCCTACCCTTCCAGTTAAAATAAACAAAAA
CUST_40180_PI429285431	1.41e-07	2.08605	lncRNA		CUST_40180_PI429285431	CUST_40180_PI429285431	FALSE	lncRNA	n407950|NR_027655|lncRNA|Homosapiens||RefGeneNoncode|NR_027655||7.5734800|-0.1452770		NONCODERv3	-				chr21	30677559	30680301	+	intronic_sense	BACH1	+	571	"BTB and CNC homology 1, basic leucine zipper transcription factor 1"	GCAAAATCTCACTTGTATACCGTCTTTAATAAGGACCCATGCCATTCTGATGTAATTATT
CUST_29202_PI429285431	5.29e-06	0.493909	lncRNA		CUST_29202_PI429285431	CUST_29202_PI429285431	FALSE	lncRNA	n326719|NULL|mRNAlikelncRNA|Homosapiens|vegalncRNA|GENCODE|OTTHUMT00000001544|http://vega.sanger.ac.uk/Homo_sapiens/Transcript/Summary?db=core;t=OTTHUMT00000001544|-0.7911120|-0.2028668		NONCODERv3	-				chr1	4511654	4512009	+	intergenic					CTTACAGCCAACGTCTTCTCCTATGTGAAAATCCTCATCTCTAAGATGATGGTATTAAGA
CUST_49009_PI429285431	6.78e-07	0.431814	lncRNA		CUST_49028_PI429285431	CUST_49028_PI429285431	FALSE	lncRNA_mRNA	hg19_lincRNAsTranscripts_TCONS_l2_00021592 range=chr4:57396775-57450744 5'pad=0 3'pad=0 strand=+ repeatMasking=none		UCSC	ENST00000512175				chr4	57396775	57397784	+	exonic_sense	THEGL	+			CAGCAAGAGATTCTCTTCGAATCTCTGATCCTTCTCCCCGGATATTACAACTCTCAGTAG
CUST_6781_PI429285431	8.43e-06	0.473985	lncRNA		CUST_6781_PI429285431	CUST_6781_PI429285431	FALSE	lncRNA	"transcript_id ""ENST00000602921.1"" | genecode_v17"		gencode_v17	-				chr21	17664112	17664692	-	intergenic					CTTAGTCTTCCCTCCATTTCAAGATGCTTTCTACCTAGCTGTATTGCAAACTGCTTAAGG
CUST_239_PI429201921	4.2e-07	0.492574	lncRNA		CUST_2390_PI429285431	CUST_2390_PI429285431	FALSE	lncRNA	"transcript_id ""ENST00000507391.1"" | genecode_v17"		gencode_v17	-				chr5	145780544	145780855	+	intergenic					TGGGTCTTTTTCATCTCCCCCCTTTGCTGATGAAGAGGCAGTGCTGTAAAATGACGAAAT
CUST_28010_PI429285431	1.22e-07	0.353378	lncRNA		CUST_28010_PI429285431	CUST_28010_PI429285431	FALSE	lncRNA	n325266|NULL|mRNAlikelncRNA|Homosapiens|vegalncRNA|GENCODE|OTTHUMT00000328267|http://vega.sanger.ac.uk/Homo_sapiens/Transcript/Summary?db=core;t=OTTHUMT00000328267|-1.1840500|-0.3898051		NONCODERv3	-				chr2	67256058	67256628	-	intergenic					GTGTCTGATGCCAAAGCCTTGAAAGTAATACTTCTATCACATCCTCCTCACTGATTTGGC
CUST_11875_PI429285431	7.15e-07	0.469069	lncRNA		CUST_11902_PI429285431	CUST_11902_PI429285431	FALSE	lncRNA	lnc-MPEG1-2:6		lncipedia2.1	-				chr11	58903530	58904231	-	intergenic					TACTATAACCACTTGGAACCACTGTGTTTCTGGTCCATCTTGTGAGGCCCATCTTTGGTT
CUST_13819_PI429285431	1.23e-07	3.34756	lncRNA		CUST_13819_PI429285431	CUST_13819_PI429285431	FALSE	lncRNA	lnc-C7orf11-2:1		lncipedia2.1	-				chr7	39807001	39807332	-	intergenic					AAAGGCCATGAAACCACAGGACAGTACTTGTTCTCAAGGGAATCTTCAGCTTAGGTGACT
CUST_45567_PI429285431	1.62e-05	0.373151	lncRNA		CUST_45567_PI429285431	CUST_45567_PI429285431	FALSE	lncRNA	"gi|343403840|ref|NR_045000.1| Homo sapiens ARP3 actin-related protein 3 homolog B (yeast) pseudogene 5 (ACTR3BP5), non-coding RNA"		ncbi	-				Chr10	38989727	38991372	+	intergenic					GGTTTCCCTCCTCCTTTTAACTTCAACTTTTTTGTTGACAAATACCATTCTGAAGGAATT
CUST_7058_PI429285431	7.4e-05	0.400017	lncRNA		CUST_7058_PI429285431	CUST_7058_PI429285431	FALSE	lncRNA	"transcript_id ""ENST00000442994.1"" | genecode_v17"		gencode_v17	-				chrX	50838690	50839419	-	intergenic					TGCCCAGTGCTGCCTCATCTGTCTCTAATCTTCTGTAGTGTTTCCCCTAATAAAGGTTTG
CUST_9698_PI429285431	1.5e-07	0.40298	lncRNA		CUST_9698_PI429285431	CUST_9698_PI429285431	FALSE	lncRNA	lnc-RNASEH2B-3:7		lncipedia2.1	-				chr13	51107329	51108447	+	intergenic					ATGAAGCAAAAGTTGCGTTTAACTCTGTCCTCACCATTCCTCTCCTGGACCTGTCCTAAA
CUST_12281_PI429285431	3.57e-07	0.408673	lncRNA		CUST_12281_PI429285431	CUST_12281_PI429285431	FALSE	lncRNA	lnc-SLC35G4-1:2		lncipedia2.1	-				chr18	11506756	11508007	+	intergenic					TGCAGGAACTTTTCAAATGTAGAGGAGCCTTTAGAAGGAAGCCTTGAGCATGAGGACAGA
LNCA_21_P0004514	7.52e-07	0.356432	lncRNA	XLOC_004448	LNCA_21_P0007525	LNCA_21_P0007525	FALSE	lncRNA			Agilent_HUMAN_G3V2	-	XLOC_009670			chr12	13329390	13329449	+	intergenic					TGGATTGATTTAACGCTGTATCTGAACCTGACTGAGGAGATTCCTTCCTGGTTCATGACC
CUST_24280_PI429285431	7.41e-06	0.495611	lncRNA		CUST_2431_PI429285431	CUST_2431_PI429285431	FALSE	lncRNA	"transcript_id ""ENST00000520300.1"" | genecode_v17"		gencode_v17	-				chr5	173001941	173002397	+	intergenic					AATCCTTCGAAGCAGGACTCCTCCCTAGCCATATTCTACACAGAAGGAAACAGAAACTCA
CUST_45530_PI429285431	1.31e-07	0.364491	lncRNA		CUST_45530_PI429285431	CUST_45530_PI429285431	FALSE	lncRNA	"gi|310120459|ref|XR_109019.1| PREDICTED: Homo sapiens uncharacterized LOC100507531 (LOC100507531), misc_RNA"		ncbi	-													GCAAAAGATTAGATTGGGATTCTGCCTGTTGTGGAGAGACAAAGACAAGAGTGCTCCAGA
CUST_35802_PI429285431	1.23e-06	3.04619	lncRNA		CUST_35813_PI429285431	CUST_35813_PI429285431	FALSE	lncRNA	n344489|NULL|lincRNA|Homosapiens|HumanlincRNA|ScriptureReconstructionLincRNAsByLuo[unpublished]|linc_luo_37|NULL|-1.4128900|-0.2271697		NONCODERv3	-				chr2	111953947	111956438	+	intergenic					AGTACATATATATCTGTGAACTGTCTCCCTAAGCATTTCCTGTTCACCTCTGTGCCACAT
LNCA_21_P0005547	2.08e-07	0.427456	lncRNA	XLOC_006663	LNCA_21_P0009116	LNCA_21_P0009116	FALSE	lncRNA			Agilent_HUMAN_G3V2	-	XLOC_011826			chr16	88219894	88219953	+	intergenic					TAGGTTATGCTAATGGCATCCACACTTGGCCTTTCCCCTCTTTCCTTATAAATCAGCCAA
CUST_15382_PI429285431	2.49e-07	3.10005	lncRNA		CUST_15382_PI429285431	CUST_15382_PI429285431	FALSE	lncRNA	lnc-CEBPB-7:3		lncipedia2.1	-				chr20	48929837	48932319	+	intergenic					AATGAGGTGTCCAGCTGGTCCCAAACCTGTAATCGGCACCCCAGTGAGCAGACTGGACAT
CUST_4360_PI429285431	1.63e-06	2.55748	lncRNA		CUST_4360_PI429285431	CUST_4360_PI429285431	FALSE	lncRNA	"transcript_id ""ENST00000605595.1"" | genecode_v17"		gencode_v17	-				chr12	89761584	89763078	+	intergenic					ACTCAGATCCATTTCTGGACTGACCTTATGCTTAACCAGATGATGTTTATTATTAAAGCT
CUST_38084_PI429285431	4.31e-08	3.52103	lncRNA		CUST_38084_PI429285431	CUST_38084_PI429285431	FALSE	lncRNA	n381074|NULL|lncRNA|Homosapiens||UCSCGeneNoncode|uc001ben.1||0.2807660|-0.2675028		NONCODERv3	-				chr1	21602542	21604867	-	intronic_sense	ECE1	-	1889	endothelin converting enzyme 1 (EC:3.4.24.71)	GGTGAACAAGTGCTGAATAAGGCCTTTCATTCATTCGGTTGTTCATTCAAAAACACGTAT
CUST_5720_PI429285431	2.47e-06	2.15361	lncRNA		CUST_5720_PI429285431	CUST_5720_PI429285431	FALSE	lncRNA	"transcript_id ""ENST00000585297.1"" | genecode_v17"		gencode_v17	-				chr17	8869213	8869614	+	bidirectional	PIK3R5	-	23533	"phosphoinositide-3-kinase, regulatory subunit 5"	AATATCTGTTAGAGGCGTGCAAACTCGGCCACAAGGTCATGGTCATACGTTATTGTTGGT
LNCA_33_P3399438	3.15e-05	0.454961	lncRNA	C9orf29
CUST_6798_PI429285431	6.9e-06	0.416789	lncRNA		CUST_6798_PI429285431	CUST_6798_PI429285431	FALSE	lncRNA	"transcript_id ""ENST00000419299.1"" | genecode_v17"		gencode_v17	-				chr21	22116057	22116885	-	intergenic					TGGTCTTCTCCCTGGCTCAGCAAGAAGATGAACTTTAAACACTGAGAAACTGGTCATCTC
LNCA_21_P0007525	7.5e-07	0.424212	lncRNA	XLOC_009670	LNCA_21_P0011016	LNCA_21_P0011016	FALSE	lncRNA			Agilent_HUMAN_G3V2	-	XLOC_l2_002761			chr11	104776255	104777733	-	intergenic					ACTTCATTGTTTTCTGCTCTTCAACCTCATATAACGTGTCCAGGAGAGACAGCACAAGGG
CUST_27701_PI429285431	5.48e-07	0.479632	lncRNA		CUST_27701_PI429285431	CUST_27701_PI429285431	FALSE	lncRNA	n324912|NULL|mRNAlikelncRNA|Homosapiens|vegalncRNA|GENCODE|OTTHUMT00000080171|http://vega.sanger.ac.uk/Homo_sapiens/Transcript/Summary?db=core;t=OTTHUMT00000080171|-1.0814900|-0.1674932		NONCODERv3	-				chr20	61909872	61910404	+	exonic_sense	ARFGAP1	+	55738	ADP-ribosylation factor GTPase activating protein 1	TTAGAAGAAAAGCATAACACATTTTCTGCGTGGAATCTGCTGGACCTATCTCCCTGCCTC
CUST_29203_PI429285431	9.02e-08	0.415044	lncRNA		CUST_29203_PI429285431	CUST_29203_PI429285431	FALSE	lncRNA	n326720|NULL|mRNAlikelncRNA|Homosapiens|vegalncRNA|GENCODE|OTTHUMT00000001814|http://vega.sanger.ac.uk/Homo_sapiens/Transcript/Summary?db=core;t=OTTHUMT00000001814|-1.0676300|-0.2646974		NONCODERv3	-				chr1	4371970	4374046	+	intergenic					TTGTCTTTATTATTCACAAGGTGAAAGTCCTTTCCTGGTACCACTGTCAGGCTCTCCACC
CUST_46223_PI429285431	2.15e-14	0.440398	lncRNA		CUST_46223_PI429285431	CUST_46223_PI429285431	FALSE	lncRNA	"gi|224586829|ref|NR_003923.2| Homo sapiens guanylate cyclase 1, soluble, beta 2 (pseudogene) (GUCY1B2), non-coding RNA"		ncbi	-				Chr13	51568647	51571646	-	intergenic					TCATTTCTCAGCTCAAAACTTCTTAAGCCGTGTCTCTTCCTCATCATCCCTTTGAGAATA
CUST_8857_PI429285431	6.66e-07	0.46929	lncRNA		CUST_8857_PI429285431	CUST_8857_PI429285431	FALSE	lncRNA	lnc-GPR55-1:9		lncipedia2.1	-				chr2	231860443	231861219	-	exonic_antisense	SPATA3	+	130560	spermatogenesis associated 3	TTTAACAGATTCTCCTTTGTGTCTAATAAGAATTGCCCCCATCAGTCGGGGCTGTCCTAG
CUST_37378_PI429285431	1.91e-08	0.302367	lncRNA		CUST_37383_PI429285431	CUST_37383_PI429285431	FALSE	lncRNA_mRNA	n345831|NULL|lincRNA|Homosapiens|HumanlincRNA|ScriptureReconstructionLincRNAsByLuo[unpublished]|linc_luo_1380|NULL|-1.6971700|-0.2288488		NONCODERv3	ENST00000423687				chr1	224149778	224150155	-	intergenic					TAAAGATGACTCTGAAGAATGGCGTGGGATGGATCCTTTCAAATGCACTTGAGCAGCAGT
CUST_21632_PI429285431	1.35e-09	0.425963	lncRNA		CUST_21632_PI429285431	CUST_21632_PI429285431	FALSE	lncRNA	lnc-PTPN9-1:4		lncipedia2.1	-				chr15	75893479	75894152	-	exonic_sense	SNUPN	-	10073	snurportin 1	ATCTTTCTAGGACTCTGTCATGGATACAAGTACTTCACCATTCCCTCCAGCAGCACTAGT
CUST_10478_PI429285431	1.42e-05	0.459847	lncRNA		CUST_10478_PI429285431	CUST_10478_PI429285431	FALSE	lncRNA	lnc-C15orf2-8:3		lncipedia2.1	-				chr15	24571319	24572924	+	intergenic					CATTTTTAGTTTCCCTCCCTAGGATTCCTGGAACCATAGTTCATAAAATTATCTCACAGC
CUST_17537_PI429285431	7.87e-08	0.371438	lncRNA		CUST_17537_PI429285431	CUST_17537_PI429285431	FALSE	lncRNA	lnc-RNF187-1:1		lncipedia2.1	-				chr1	228697592	228698156	+	intergenic					TAAAAACTGTTGATATTAGGATGTACATTTCTTGTTCCCCCAAAGGCAAGGCTCTCCCCA
CUST_49950_PI429285431	4.06e-07	2.64365	lncRNA		CUST_49954_PI429285431	CUST_49954_PI429285431	FALSE	lncRNA	hg19_lincRNAsTranscripts_TCONS_l2_00026893 range=chr7:130565099-130582733 5'pad=0 3'pad=0 strand=- repeatMasking=none		UCSC	-				chr7	130565099	130568098	-	intergenic					TGGAGATGGAGAGTTTTGACAATTTTAAGTGCATGTTCTGTGTGTAAGAAAGAGTCATTA
CUST_49759_PI429285431	1.95e-09	5.27056	lncRNA		CUST_49760_PI429285431	CUST_49760_PI429285431	FALSE	lncRNA	hg19_lincRNAsTranscripts_TCONS_l2_00025849 range=chr7:45831388-45863181 5'pad=0 3'pad=0 strand=+ repeatMasking=none		UCSC	-				chr7	45843388	45844020	+	intergenic					GTGAAATAGAGTTTTCAGATTTATGTAGCATGGAAAGTTTTAATACCTCAGAGTTACTGA
CUST_45242_PI429285431	2.68e-05	0.448046	lncRNA		CUST_45242_PI429285431	CUST_45242_PI429285431	FALSE	lncRNA	"gi|374349255|ref|NR_046232.1| Homo sapiens uncharacterized LOC619344 (C8orf69), non-coding RNA"		ncbi	-				Chr8	96219235	96219756	-	intergenic					CAGGCACAGGAGCACTGAGGACCCTTCTTGACCTCCTGGATCAGAAAGGCAGAGGAAATG
CUST_4949_PI429285431	0.000350689	0.441933	lncRNA		CUST_49503_PI429285431	CUST_49503_PI429285431	FALSE	lncRNA_mRNA	hg19_lincRNAsTranscripts_TCONS_l2_00024648 range=chr6:24797606-24799099 5'pad=0 3'pad=0 strand=- repeatMasking=none		UCSC	gi|542133089|ref|NM_001282492.1|				chr6	24797606	24798344	-	intergenic					CAGAGGTGCTGTATTTCCTAATTGGTTTTCATAGGAATTAGTTTCTCTAAATCCAGTTAC
CUST_2578_PI429285431	4.35e-12	0.412743	lncRNA		CUST_2578_PI429285431	CUST_2578_PI429285431	FALSE	lncRNA	"transcript_id ""ENST00000434493.1"" | genecode_v17"		gencode_v17	-				chr6	92100031	92100472	-	intergenic					AACGGCACTGGTTCTTCTCATTGTGTATTCCTTTTCAGATGCATACTTTCTCCCTTTAAC
CUST_35636_PI429285431	1.9e-05	2.50525	lncRNA		CUST_35651_PI429285431	CUST_35651_PI429285431	FALSE	lncRNA	n342800|BC008645|mRNAlikelncRNA|Homosapiens|HumanlncRNA|JounralRNA|5303|NULL|-1.1498200|-0.3361735		NONCODERv3	-				chr7	26223683	26224522	-	exonic_antisense	NFE2L3	+	9603	nuclear factor (erythroid-derived 2)-like 3	CAGTGAAGTAGTCTGGAGGAGAGAGGCTGTTTAAATGCCTCTAAGCGCTAAAACTACAAG
LNCA_21_P0014440	1.09e-05	0.310879	lncRNA	LOC100507031
CUST_36292_PI429285431	0.00179646	0.404087	lncRNA		CUST_36292_PI429285431	CUST_36292_PI429285431	FALSE	lncRNA	n344818|NULL|lincRNA|Homosapiens|HumanlincRNA|ScriptureReconstructionLincRNAsByLuo[unpublished]|linc_luo_367|NULL|-1.3181200|-0.4043192		NONCODERv3	-				chr8	32785503	32786591	+	intergenic					AGCATCCCAATAATCGAAAGTTTAACTAAGCTATACTAATAGGGTTGGTCAATTTCGTGC
CUST_2857_PI429285431	1.94e-06	2.79055	lncRNA		CUST_2857_PI429285431	CUST_2857_PI429285431	FALSE	lncRNA	"transcript_id ""ENST00000416572.1"" | genecode_v17"		gencode_v17	-				chr7	65844814	65845369	-	intergenic					TACCACTTAGTGTTGATTGTGATGAAATGCCAGCTGTGGCATATGCCTTGGGAGCTAAGT
CUST_29234_PI429285431	3.2e-05	2.04443	lncRNA		CUST_29234_PI429285431	CUST_29234_PI429285431	FALSE	lncRNA	n326765|NULL|mRNAlikelncRNA|Homosapiens|vegalncRNA|GENCODE|OTTHUMT00000007036|http://vega.sanger.ac.uk/Homo_sapiens/Transcript/Summary?db=core;t=OTTHUMT00000007036|-1.1967800|-1.0000000		NONCODERv3	-				chr1	132670	133187	-	intergenic					TCAGGTCTCTTGCACCAGAAGGTGGCAGGATCCATTGGGAGGAAACAGGCCACCTTGGAA
CUST_35298_PI429285431	0.000500213	0.443894	lncRNA		CUST_35302_PI429285431	CUST_35302_PI429285431	FALSE	lncRNA	n342324|AK092435|mRNAlikelncRNA|Homosapiens|HumanlncRNA|JounralRNA|4816|NULL|-1.0488600|-0.4131473		NONCODERv3	-				chr1	161583095	161584981	+	intergenic					GAATAGCCACTGGCTATACATTTCCCCATTATAACAGGATTCACTGCATTCCATAAATTT
CUST_47910_PI429285431	0.00223394	2.84576	lncRNA		CUST_47910_PI429285431	CUST_47910_PI429285431	FALSE	lncRNA	"gi|410171988|ref|XR_171519.1| PREDICTED: Homo sapiens putative POM121-like protein 1-like (LOC101060558), misc_RNA"		ncbi	-													TTCTAAAGCACCCACTATGGATGCACAGCAGGACAGACCCAAGTCCCAAGACTCCCTGGG
CUST_40741_PI429285431	2.36e-07	2.91526	lncRNA		CUST_40741_PI429285431	CUST_40741_PI429285431	FALSE	lncRNA	n410453|NR_037596|lncRNA|Homosapiens||RefGeneNoncode|NR_037596||5.0770000|-0.0978022		NONCODERv3	-				chr4	120329677	120331494	-	intergenic					GTGTTAAACAGGTTTAATGACGGTCATGGCAACTTTCTGGCACAATAAAAAATATCCCCG
CUST_48249_PI429285431	5.04e-07	2.65541	lncRNA		CUST_48249_PI429285431	CUST_48249_PI429285431	FALSE	lncRNA	hg19_lincRNAsTranscripts_TCONS_l2_00000966 range=chr1:708380-743969 5'pad=0 3'pad=0 strand=- repeatMasking=none		UCSC	-				chr1	708380	708695	-	intergenic					TGGTCAAAATGATGATTATTCCCCACCTTCTAAGAGACAAAGACCAACGAGCCACCACAG
CUST_35595_PI429285431	1.89e-08	0.343172	lncRNA		CUST_35611_PI429285431	CUST_35611_PI429285431	FALSE	lncRNA_mRNA	n342748|AB126073|mRNAlikelncRNA|Homosapiens|HumanlncRNA|JounralRNA|5251|NULL|1.4610400|-0.0775336		NONCODERv3	gi|60593037|ref|NM_001012709.1|				chr11	1642187	1643545	-	exonic_sense	KRTAP5-4	-	387267	keratin associated protein 5-4	AATGTCCATTGTCTCTCCTAACAAATTCTCTCCCCAAGTCAACTGCAATTGCAGCTGAAT
CUST_9997_PI429285431	0.000891142	0.491899	lncRNA		CUST_9997_PI429285431	CUST_9997_PI429285431	FALSE	lncRNA	lnc-KIAA0513-1:4		lncipedia2.1	-				chr16	85181229	85181709	+	intergenic					CCTCCTCCTCTTGAAAATGGAGACAAAATTCAAATAACATAAACTTCACCACTTTAACCA
CUST_17887_PI429285431	2.95e-07	0.499162	lncRNA		CUST_17887_PI429285431	CUST_17887_PI429285431	FALSE	lncRNA	lnc-CCDC90A-5:1		lncipedia2.1	-				chr6	14448747	14449220	-	intergenic					TAGCTTTCCCCCTCCCAGCACACCCAGCCCTAGATCATCCAGTTGTCTTTTAGAGCTTAC
CUST_18246_PI429285431	2.62e-11	6.00438	lncRNA		CUST_18246_PI429285431	CUST_18246_PI429285431	FALSE	lncRNA	lnc-ZNF37A-4:1		lncipedia2.1	-				chr10	38754897	38755830	+	intergenic					TTGCTCGCCAACAAGGAAAACTTTTAAGTAGAGCAGAACCTGAATAGACAATATATTTCT
LNCA_21_P0009816	2.17e-05	0.492742	lncRNA	XLOC_013679	LNCA_21_P0013898	LNCA_21_P0013898	FALSE	lncRNA_mRNA			Agilent_HUMAN_G3V2	"ENST00000367270,ENST00000391959,ENST00000336894,ENST00000406302"	XLOC_l2_015964			chrY	28425319	28425468	-	intergenic					TGAGAGTTCAAAGACTACCACAAACACTACAACTGCAAAGGAAATGGACAAAAATGAATG
LNCA_33_P3312807	0.000678888	0.412358	lncRNA	IPW
CUST_46269_PI429285431	8.93e-06	0.367481	lncRNA		CUST_46269_PI429285431	CUST_46269_PI429285431	FALSE	lncRNA	"gi|410170844|ref|XR_110305.3| PREDICTED: Homo sapiens uncharacterized LOC100506016 (LOC100506016), misc_RNA"		ncbi	-				Chr13	112809471	112811198	-	intergenic					CATCAGCTGCTTCTCCCTGATCTATTTTCCCATTAAAAAATAAAGACTTGGATCCTGCAA
CUST_33466_PI429285431	3.02e-07	3.37826	lncRNA		CUST_33470_PI429285431	CUST_33470_PI429285431	FALSE	lncRNA	n340205|CR610292|mRNAlikelncRNA|Homosapiens|HumanlncRNA|JounralRNA|2666|NULL|-1.1360000|-0.2443396		NONCODERv3	-				chr4	120409797	120410777	+	intergenic					TGGATCATCTCCTAAGGTTTCACCTGCTTTGCATCAGTGAGTTGGACTATGGATCAGGTA
CUST_16658_PI429285431	0.000139837	0.196594	lncRNA		CUST_16658_PI429285431	CUST_16658_PI429285431	FALSE	lncRNA	lnc-RAB30-2:1		lncipedia2.1	-				chr11	82808177	82809823	-	intergenic					ATTCCATTCTGTTCTCCCAAGCACCTAGTGTAAAACTCAACGACAGCACTTTGACTGTAG
CUST_13264_PI429285431	8.84e-05	0.453737	lncRNA		CUST_13264_PI429285431	CUST_13264_PI429285431	FALSE	lncRNA	lnc-TSHZ2-3:7		lncipedia2.1	-				chr20	51314770	51315215	+	intergenic					TATGAGCCCCACCTTTAGAATCTGTGAATCTCCCCTTCAGATGGGAAAGCTGTTTTTGTG
CUST_43311_PI429285431	9.64e-06	0.494401	lncRNA		CUST_43311_PI429285431	CUST_43311_PI429285431	FALSE	lncRNA	ENST00000589524 havana:lincRNA chromosome:GRCh37:19:36440386:36442421:1 gene:ENSG00000267307 gene_biotype:lincRNA transcript_biotype:lincRNA		ensembl.GRCh37.72	-				chr19	36440386	36442421	+	intergenic					TTTACAGAGAGAGCCGAGGCAGAGAGGGTCTTCCCAGGAGAGAGAGCATTGGGTACAAAA
CUST_49947_PI429285431	5.04e-07	2.43598	lncRNA		CUST_49948_PI429285431	CUST_49948_PI429285431	FALSE	lncRNA	hg19_lincRNAsTranscripts_TCONS_l2_00026200 range=chr7:128218983-128259236 5'pad=0 3'pad=0 strand=+ repeatMasking=none		UCSC	-				chr7	128218983	128219705	+	intergenic					AGAAAAGATGATGATTATTCCCCACCTTCTAAGAGACAAAGACCAACGAGCCACCACAGC
CUST_11454_PI429285431	0.000164431	0.493739	lncRNA		CUST_11483_PI429285431	CUST_11483_PI429285431	FALSE	lncRNA	lnc-IL6-3:5		lncipedia2.1	-				chr7	22640579	22642260	+	intergenic					CAAGGGTTTTAAATAAGTTTTTCAAACTCCTTAATGTCTCCCTTCCACAAAGCATACCAA
CUST_37806_PI429285431	1.62e-05	0.486545	lncRNA		CUST_37806_PI429285431	CUST_37806_PI429285431	FALSE	lncRNA	n346318|NULL|lincRNA|Homosapiens|HumanlincRNA|ScriptureReconstructionLincRNAsByLuo[unpublished]|linc_luo_1868|NULL|-1.3715500|-0.0735581		NONCODERv3	-				chr11	1212781	1213562	-	intergenic					TGGTTGGGAGTGGGTTGTCTTGGATACAGAAAGATGGCTTGTGCTGGTCTTTGAAACAGG
CUST_3641_PI429285431	7.25e-07	0.457369	lncRNA		CUST_36418_PI429285431	CUST_36418_PI429285431	FALSE	lncRNA	n344934|NULL|lincRNA|Homosapiens|HumanlincRNA|ScriptureReconstructionLincRNAsByLuo[unpublished]|linc_luo_483|NULL|-1.2951200|-0.3220261		NONCODERv3	-				chr6	167394322	167397321	-	intergenic					ATGGGTACACGTGCATGCGCACACACACACAGATATATTAGTTCCTAAAGAAATAAAATC
CUST_10925_PI429285431	4.27e-06	2.38325	lncRNA		CUST_10925_PI429285431	CUST_10925_PI429285431	FALSE	lncRNA	lnc-FRG1-5:3		lncipedia2.1	-				chr4	190198789	190199151	+	intergenic					TGTGACAGGCTCTCATAATCACCATCATCATGTGATCTTGTGCATGTTACAGGGAAGCAC
CUST_2901_PI429285431	5.63e-07	0.454271	lncRNA		CUST_2901_PI429285431	CUST_2901_PI429285431	FALSE	lncRNA	"transcript_id ""ENST00000436714.1"" | genecode_v17"		gencode_v17	-				chr7	108962377	108962774	-	intergenic					CAGGAATTGTTTTCTTTTTCATGAAACACCTCTCTCCTCCCTTATCTCACCACAAAAAAG
LNCA_21_P0009623	7.33e-07	0.423208	lncRNA	XLOC_012769	LNCA_21_P0013528	LNCA_21_P0013528	FALSE	lncRNA			Agilent_HUMAN_G3V2	-	XLOC_l2_014602			chr8	100025097	100025156	-	bidirectional	VPS13B	+	157680	vacuolar protein sorting 13 homolog B (yeast)	CGCTGGTTCGATGCAGAGGAAGAAACCACACCTAGCACGTAAAGCCCTGAAAAAATAGAG
CUST_46270_PI429285431	0.000439861	0.496171	lncRNA		CUST_46270_PI429285431	CUST_46270_PI429285431	FALSE	lncRNA	"gi|310124562|ref|XR_110307.1| PREDICTED: Homo sapiens uncharacterized LOC100506063 (LOC100506063), misc_RNA"		ncbi	-													GGTGTTTCTCTTTCCCTGATGCCTCTTGTGCCAACAAATAAAGACTTTCAGCTCTTCCTG
CUST_11043_PI429285431	0.00130933	0.415659	lncRNA		CUST_11085_PI429285431	CUST_11085_PI429285431	FALSE	lncRNA	lnc-SOD2-2:3		lncipedia2.1	-				chr6	160015135	160016925	-	intergenic					TGACTTGCAGAAAGAGGAAAAAATAGAACCAACGGAGGAGAGGTGACCATGATACTAACA
CUST_43359_PI429285431	8.85e-06	0.488627	lncRNA		CUST_43359_PI429285431	CUST_43359_PI429285431	FALSE	lncRNA	"gi|410170378|ref|XR_171028.1| PREDICTED: Homo sapiens uncharacterized LOC101060082, transcript variant 1 (LOC101060082), misc_RNA"		ncbi	-													TCAGCCAAGAGCTTCCCAGGAGAGCCCTCATCTTCAACCCCTAGTGGCGACCAGAGCCAG
LNCA_21_P0014558	0.00188835	0.450502	lncRNA	LOC100506767
CUST_15342_PI429285431	0.000120395	0.467441	lncRNA		CUST_15342_PI429285431	CUST_15342_PI429285431	FALSE	lncRNA	lnc-TERF1-2:1		lncipedia2.1	-				chr8	74005780	74006170	+	bidirectional	SBSPON	-			GCTCTGTTTTCTGATAAACCAATTTCTCCCCCTAAAAACTCTGTGTACTGATATTTTAGA
CUST_40995_PI429285431	1.64e-05	0.36357	lncRNA		CUST_40995_PI429285431	CUST_40995_PI429285431	FALSE	lncRNA	n411169|NR_038997|lncRNA|Homosapiens||RefGeneNoncode|NR_038997||1.0531300|-0.1501126		NONCODERv3	-				chr15	79484048	79484740	-	intergenic					AAATGTGCCTCCTTGTGTTCTCCCAGTGATGTGATAAAGGTGGCATCTCACTGAAAAGGA
LNCA_21_P0011536	4.81e-08	2.11064	lncRNA	LRRC37BP1	LNCA_33_P3226407	LNCA_33_P3226407	FALSE	lncRNA	XR_132886	XR_132886	Agilent_HUMAN_G3V2	-	LOC729732	uncharacterized LOC729732		chr8	12453658	12453717	-	intergenic					ATTTTTCTTCTTGTGGCCTCTGGAATGTGACACAGAACTCAAGGGACAGGAAGGAGATGA
CUST_50782_PI429285431	2.57e-07	3.66673	lncRNA		CUST_50782_PI429285431	CUST_50782_PI429285431	FALSE	lncRNA	hg19_lincRNAsTranscripts_TCONS_l2_00004869 range=chr11:177835-180409 5'pad=0 3'pad=0 strand=- repeatMasking=none		UCSC	-				chr11	177835	178094	-	intergenic					TTTGGTGTTCTTCATTGGAGATTGGCAGCAGACAACAGTCAATTTACAACCTGGCTCTGC
CUST_45768_PI429285431	6.18e-07	2.08582	lncRNA		CUST_45768_PI429285431	CUST_45768_PI429285431	FALSE	lncRNA	"gi|378548187|ref|NR_034094.2| Homo sapiens MRVI1 antisense RNA 1 (MRVI1-AS1), transcript variant 4, non-coding RNA"		ncbi	-				Chr11	10562783	10563415	+	intergenic					AGAGAACACAGCCACCCTCATCAGCCAGAGTTCAAACCCTGACAGTGCCCATGGAGAGAT
CUST_41431_PI429285431	1.91e-06	0.406933	lncRNA		CUST_41431_PI429285431	CUST_41431_PI429285431	FALSE	lncRNA	ENST00000585107 ncrna:miRNA chromosome:GRCh37:7:100802754:100802836:1 gene:ENSG00000264425 gene_biotype:miRNA transcript_biotype:miRNA		ensembl.GRCh37.72	-				chr7	100802754	100802836	+	intronic_sense	AP1S1	+	1174	"adaptor-related protein complex 1, sigma 1 subunit"	TTAACACCAAAGGGTTAAGGGTTTGCTCTGGAGTTAAGGGTTGCTTGGAGAATTGGAGAA
CUST_43905_PI429285431	8.07e-10	0.499023	lncRNA		CUST_43905_PI429285431	CUST_43905_PI429285431	FALSE	lncRNA	"gi|310118972|ref|XR_109920.1| PREDICTED: Homo sapiens uncharacterized LOC100506076, transcript variant 4 (LOC100506076), misc_RNA"		ncbi	-													TATTCACATTGGACTAGGCAGGAACAAAGATCACCACAACTGGCTCCCCTTCAACTATGT
CUST_9425_PI429285431	1.11e-05	0.355002	lncRNA		CUST_9425_PI429285431	CUST_9425_PI429285431	FALSE	lncRNA	lnc-TNFAIP6-2:9		lncipedia2.1	-				chr2	151491749	151492565	+	intergenic					AGGCTTCTCCCACAGAGCTTCTTGTACAAATTAAAACAGGGCAGTAGAAGGTTTTCAGGT
CUST_149_PI429285431	1.41e-08	0.379637	lncRNA		CUST_14905_PI429285431	CUST_14905_PI429285431	FALSE	lncRNA	lnc-THNSL2-1:2		lncipedia2.1	-				chr2	88584346	88584736	+	intergenic					ACTGCCTCTCGTGTTTTCGCTTTGCCTCCTGCCTGCCAACCAAAGGTGAAAGGGGAAGAT
CUST_32504_PI429285431	0.00194957	0.326533	lncRNA		CUST_32504_PI429285431	CUST_32504_PI429285431	FALSE	lncRNA	n339108|AF088010|mRNAlikelncRNA|Homosapiens|HumanlncRNA|JounralRNA|1538|NULL|-1.1547800|-0.2906179		NONCODERv3	-				chr16	19077312	19078024	+	intergenic					TCTCCCAGTTCCAGCCCCCTGATGTTGCCAATATTAAACGTTGTATATCCTTGCAAAAAA
CUST_42890_PI429285431	1.12e-08	2.03748	lncRNA		CUST_42890_PI429285431	CUST_42890_PI429285431	FALSE	lncRNA	ENST00000459004 ncrna:snoRNA chromosome:GRCh37:5:82360023:82360156:-1 gene:ENSG00000238835 gene_biotype:snoRNA transcript_biotype:snoRNA		ensembl.GRCh37.72	-				chr5	82360023	82360156	-	intronic_sense	TMEM167A	-	153339	transmembrane protein 167A	GTTCTCAGGGCTGCCAACCTTCTAGTAAAGGTTGAGTGGTAGTATATTTCTCCAACATAA
CUST_13911_PI429285431	8.76e-06	0.400419	lncRNA		CUST_13911_PI429285431	CUST_13911_PI429285431	FALSE	lncRNA	lnc-ASCL4-1:1		lncipedia2.1	-				chr12	108307664	108307909	+	intergenic					ATGGGCGAAGATGTATGTGTAAGTGATTTGCTCAAGATTATGCAACCTCCCTGGGCATAG
CUST_5914_PI429285431	7.7e-07	2.26945	lncRNA		CUST_5914_PI429285431	CUST_5914_PI429285431	FALSE	lncRNA	"transcript_id ""ENST00000577267.1"" | genecode_v17"		gencode_v17	-				chr17	56069403	56070458	-	intergenic					TTTGTTCTGGGGGTGAAGGAGGAAACAGACTGTACTAAAGGACTAAAATAATTTGTCTAT
CUST_8233_PI429285431	3.86e-06	0.449361	lncRNA		CUST_823_PI429285431	CUST_823_PI429285431	FALSE	lncRNA	"transcript_id ""ENST00000442026.1"" | genecode_v17"		gencode_v17	-				chr2	33931975	33932651	+	intergenic					GGAAGTTTACCAACCCTGGAGAACATCAGCTCTCCCTTTCTTCCCTCTTTGCAATTGAAT
CUST_6745_PI429285431	1.25e-06	0.434004	lncRNA		CUST_6745_PI429285431	CUST_6745_PI429285431	FALSE	lncRNA	"transcript_id ""ENST00000443747.1"" | genecode_v17"		gencode_v17	-				chr20	58090246	58090811	+	intergenic					AATAGAAAGTAATTCTCCATGTGTCTTCCTCCAGCTCCAATCTAGTTTAAAACCATCCCC
CUST_35071_PI429285431	1.52e-06	0.495056	lncRNA		CUST_35074_PI429285431	CUST_35074_PI429285431	FALSE	lncRNA	n342028|BC038547|mRNAlikelncRNA|Homosapiens|HumanlncRNA|JounralRNA|4509|NULL|-1.0899800|-0.1620852		NONCODERv3	-				chr12	116971239	116971697	+	intergenic					TGGAGACTCCTATTCACCCTTCAGATCAATATCCCCCAAATAAACTCCCAGTCACTCTGG
CUST_6020_PI429285431	1.88e-06	0.463905	lncRNA		CUST_6020_PI429285431	CUST_6020_PI429285431	FALSE	lncRNA	"transcript_id ""ENST00000570919.1"" | genecode_v17"		gencode_v17	-				chr17	80687040	80687372	-	intergenic					TTGCCAAGTTCACCAAGTGGCTTCTTCCCCCAAAGGTAATTCTACAGCTACTTTCATTCT
CUST_168_PI429201921	8.36e-06	0.46346	lncRNA		CUST_16800_PI429285431	CUST_16800_PI429285431	FALSE	lncRNA	lnc-ASB4-3:2		lncipedia2.1	-				chr7	95236252	95236558	+	intergenic					AGATTTCTCCCTTACTATTCCTGCTCATTGTCTTCTGTGGACTAATACTGAACATGAAAC
CUST_36214_PI429285431	4.37e-08	0.477653	lncRNA		CUST_36214_PI429285431	CUST_36214_PI429285431	FALSE	lncRNA	n344759|NULL|lincRNA|Homosapiens|HumanlincRNA|ScriptureReconstructionLincRNAsByLuo[unpublished]|linc_luo_308|NULL|-1.3519900|-0.2811059		NONCODERv3	-				chr6	14790200	14793199	-	intergenic					CTATATTTATCATGACTGCCCAGGAGATCTTTGCCTTGGCTTCTCTTCTCCTGATGAAAC
CUST_36263_PI429285431	2.86e-05	0.477427	lncRNA		CUST_36263_PI429285431	CUST_36263_PI429285431	FALSE	lncRNA	n344794|NULL|lincRNA|Homosapiens|HumanlincRNA|ScriptureReconstructionLincRNAsByLuo[unpublished]|linc_luo_343|NULL|-1.3409100|-0.3003945		NONCODERv3	-				chr11	119607516	119608279	+	intergenic					AGCTGCCCTGGAGTGGAGCAACAGCATGTCCTCTCCCCTGTGTGACTGCAGTGCTATAAT
CUST_19085_PI429285431	5.14e-08	2.281	lncRNA		CUST_19085_PI429285431	CUST_19085_PI429285431	FALSE	lncRNA	lnc-SPRYD7-1:1		lncipedia2.1	-				chr13	50699438	50700704	-	intergenic					GGACTTACAGGAGAATTGAACAGTTGTTTCTGCTGACTCAGTAAAAAGTCTTCATTTTAT
CUST_4944_PI429285431	2.5e-07	0.382836	lncRNA		CUST_49446_PI429285431	CUST_49446_PI429285431	FALSE	lncRNA	hg19_lincRNAsTranscripts_TCONS_l2_00022708 range=chr5:180708641-180720947 5'pad=0 3'pad=0 strand=+ repeatMasking=none		UCSC	-				chr5	180708641	180709018	+	intergenic					GAAAATATGACATGAACTTATGAATTCAACAGGTGAAGATTTACAACTTGATAAATCAAC
CUST_7968_PI429285431	8.33e-06	2.28888	lncRNA		CUST_7968_PI429285431	CUST_7968_PI429285431	FALSE	lncRNA	lnc-TMEM60-1:4		lncipedia2.1	-				chr7	77325489	77326097	-	exonic_antisense	RSBN1L	+	222194	round spermatid basic protein 1-like	GAGTGTGCAAAACAATCTGTAAGGGTTCAGAAAACATACTGCTTCTATATATAGTTACCT
CUST_1160_PI429285431	1.31e-06	2.53626	lncRNA		CUST_1162_PI429285431	CUST_1162_PI429285431	FALSE	lncRNA	"transcript_id ""ENST00000417038.1"" | genecode_v17"		gencode_v17	-				chr2	175352131	175352523	+	bidirectional	GPR155	-	151556	G protein-coupled receptor 155	GCAGACTTGTCTTTCCGCTTAACCTCAACCTCGTGTGATCTGCCAGTTTCGCTCCCGACG
CUST_39250_PI429285431	2.57e-07	0.48787	lncRNA		CUST_39250_PI429285431	CUST_39250_PI429285431	FALSE	lncRNA	n386117|NULL|lncRNA|Homosapiens||UCSCGeneNoncode|uc010bls.1||3.1767000|-0.1375698		NONCODERv3	-				chr15	82619907	82622606	+	intergenic					TTGGGAGTCATCTCATCTTTGTCTGGCTTGGCCTGTCTCCTTTCCTCTGTATCTTTGACC
CUST_3444_PI429285431	1.95e-05	0.448966	lncRNA		CUST_34445_PI429285431	CUST_34445_PI429285431	FALSE	lncRNA	n341320|AK126477|mRNAlikelncRNA|Homosapiens|HumanlncRNA|JounralRNA|3789|NULL|0.5460210|-0.3756463		NONCODERv3	-				chr7	131027723	131029035	+	intronic_sense	MKLN1	+	4289	"muskelin 1, intracellular mediator containing kelch motifs"	CTAATGCTGTTGATAGAGATGTGTTGCCCTAAGATTTATTGGATTTAATGAGACAGTCTT
LNCA_21_P0008938	3.13e-06	0.492831	lncRNA	XLOC_011721	LNCA_21_P0012400	LNCA_21_P0012400	FALSE	lncRNA_mRNA	NR_027766	NR_027766	Agilent_HUMAN_G3V2	"ENST00000502852,ENST00000521288,ENST00000359850,ENST00000537561"	NUDT16P1	nudix (nucleoside diphosphate linked moiety X)-type motif 16 pseudogene 1		chr3	131081189	131081248	+	intergenic					ACGTGTTGTGGCCCACTTCTATGCCAAATCTCTGACGCTCGAGCAGCTGTTGGCTGTGGA
CUST_1162_PI429285431	9.54e-08	0.459422	lncRNA		CUST_11633_PI429285431	CUST_11633_PI429285431	FALSE	lncRNA	lnc-SUCLG1-1:1		lncipedia2.1	-				chr2	84704945	84707012	-	intergenic					TAGTGCAGAAACCCTGACCCAATGGCTACCTTTGGGTAAGTGTTGGTGTCCTGTAACATA
CUST_46783_PI429285431	4.63e-07	0.490919	lncRNA		CUST_46783_PI429285431	CUST_46783_PI429285431	FALSE	lncRNA	"gi|261337148|ref|NR_029393.1| Homo sapiens keratin 16 pseudogene 3 (KRT16P3), non-coding RNA"		ncbi	-				Chr17	20404826	20406876	-	intergenic					TATATTGTCTGGCCCATCAGTACCCCAACTGGGATCAAAATCCAGGCACCTCTCAAAAAA
CUST_3540_PI429285431	0.000172369	0.412409	lncRNA		CUST_3540_PI429285431	CUST_3540_PI429285431	FALSE	lncRNA	"transcript_id ""ENST00000425153.1"" | genecode_v17"		gencode_v17	-				chr9	129289897	129290235	+	intergenic					AAGGGATTCCACCCCCCATTCCAAGTCCCCTCCAAAAATATATATTGAAAGAAAACAAAA
CUST_45473_PI429285431	7.33e-08	0.453518	lncRNA		CUST_45473_PI429285431	CUST_45473_PI429285431	FALSE	lncRNA	"gi|341916031|ref|XR_132727.1| PREDICTED: Homo sapiens uncharacterized LOC651337 (LOC651337), misc_RNA"		ncbi	-													TCCATCCGCAACAGAACAGAATCATGCCACACCCTTCACTAGGCCTCCCAGGAGAGGAGA
CUST_5863_PI429285431	8.79e-08	0.472579	lncRNA		CUST_5863_PI429285431	CUST_5863_PI429285431	FALSE	lncRNA	"transcript_id ""ENST00000593169.1"" | genecode_v17"		gencode_v17	-				chr17	41757641	41758189	+	intergenic					GACCACCTAGTGCCTTTCCACTAAGATTGTTCCTTCCCTCTCCTGAAGATTATCCTCCTG
LNCA_21_P0010040	2.7e-05	0.471625	lncRNA	XLOC_013744	LNCA_21_P0014160	LNCA_21_P0014160	FALSE	lncRNA	XR_108646	XR_108646	Agilent_HUMAN_G3V2	-	LOC100505697	uncharacterized LOC100505697		chr6	40484082	40484141	-	intronic_sense	LRFN2	-	57497	leucine rich repeat and fibronectin type III domain containing 2	GAAGTCTGCTTGGTGACCCGTCCAGACCTGACTTGGTATAAATGATTTTGTTGCAGAGAA
CUST_23291_PI429285431	5.92e-07	2.38189	lncRNA		CUST_23291_PI429285431	CUST_23291_PI429285431	FALSE	lncRNA	lnc-XXYLT1-1:1		lncipedia2.1	-				chr3	195002868	195003557	-	intronic_sense	ACAP2	-	23527	"ArfGAP with coiled-coil, ankyrin repeat and PH domains 2"	ATCAACGATTTATCTTGAAAATAAGATTCCTTCGTCTGAGGGATTGATCTGTATGTGTGT
CUST_16719_PI429285431	6.3e-06	0.456599	lncRNA		CUST_16719_PI429285431	CUST_16719_PI429285431	FALSE	lncRNA	lnc-RGL4-3:1		lncipedia2.1	-				chr22	23894435	23895446	+	intergenic					TTCCATTTATTCCTCTGTTCACCCTGCCATTTATCCTCCCATTCACTCTCCAATCTATCC
CUST_29163_PI429285431	7.43e-10	0.421318	lncRNA		CUST_29163_PI429285431	CUST_29163_PI429285431	FALSE	lncRNA	n326674|NULL|mRNAlikelncRNA|Homosapiens|vegalncRNA|GENCODE|OTTHUMT00000091258|http://vega.sanger.ac.uk/Homo_sapiens/Transcript/Summary?db=core;t=OTTHUMT00000091258|-0.7984970|-0.1666081		NONCODERv3	-				chr1	23748216	23748671	-	intronic_sense	TCEA3	-	6920	"transcription elongation factor A (SII), 3"	TACAATCCAGGCTCATGGCTATTCTCCTCCAATATGACCCAGTTATACAGCTGTGACACA
CUST_36711_PI429285431	4.02e-05	0.400184	lncRNA		CUST_36711_PI429285431	CUST_36711_PI429285431	FALSE	lncRNA	n345197|NULL|lincRNA|Homosapiens|HumanlincRNA|ScriptureReconstructionLincRNAsByLuo[unpublished]|linc_luo_746|NULL|-1.3517400|-0.2884354		NONCODERv3	-				chr13	45927524	45927628	-	intergenic					TTAGGCCACTTTTCCTCCTCCCAGGGAAGAGCTCTTCTCTATGGTTTTGTTTTGTTTTTT
CUST_11663_PI429285431	6.26e-05	0.468203	lncRNA		CUST_11677_PI429285431	CUST_11677_PI429285431	FALSE	lncRNA	lnc-SNURF-5:3		lncipedia2.1	-				chr15	26121855	26122771	+	intergenic					ATCCGTTCTCTCCCAAATGACTAATAGAAAGCTCCAGTCACCAAGATCAACTTCTCTAAA
CUST_48248_PI429285431	2.92e-07	3.12282	lncRNA		CUST_48248_PI429285431	CUST_48248_PI429285431	FALSE	lncRNA	hg19_lincRNAsTranscripts_TCONS_l2_00000965 range=chr1:708328-714035 5'pad=0 3'pad=0 strand=- repeatMasking=none		UCSC	-				chr1	708328	708694	-	intergenic					TCATCAGAGTGGGGACTGATGATGATTATTCCCCACCTTCTAAGAGACAAAGACCAACGA
CUST_35928_PI429285431	0.000181432	0.490978	lncRNA		CUST_35943_PI429285431	CUST_35943_PI429285431	FALSE	lncRNA	n344580|NULL|lincRNA|Homosapiens|HumanlincRNA|ScriptureReconstructionLincRNAsByLuo[unpublished]|linc_luo_128|NULL|-1.2887000|-0.3528473		NONCODERv3	-				chr4	93176334	93179333	-	intergenic					AGTGTACACCACTCAGGACCAAGAGAATCATCCTGCTGCTGCTATCTATCACCTATATAC
CUST_37708_PI429285431	3.29e-07	0.40064	lncRNA		CUST_37708_PI429285431	CUST_37708_PI429285431	FALSE	lncRNA	n346204|NULL|lincRNA|Homosapiens|HumanlincRNA|ScriptureReconstructionLincRNAsByLuo[unpublished]|linc_luo_1754|NULL|-1.3644300|-0.2052682		NONCODERv3	-				chr2	43199834	43200560	-	intergenic					ATTTGCGTTCTCTCCTCTGCAAGTACAGGATCTCGTTTGATTCTCAAAACCACCCTAGAG
CUST_18603_PI429285431	2.35e-08	0.490921	lncRNA		CUST_18608_PI429285431	CUST_18608_PI429285431	FALSE	lncRNA	lnc-ARHGEF35-1:16		lncipedia2.1	-				chr7	144040280	144040615	-	intergenic					GAGTAGTGAAATGGTGAAAAATCAGACAATGGTCACAGAGTTCCTCCTACTGGGATTTCT
CUST_22054_PI429285431	2.53e-05	2.61411	lncRNA		CUST_22054_PI429285431	CUST_22054_PI429285431	FALSE	lncRNA	lnc-C2orf42-3:6		lncipedia2.1	-				chr2	70314413	70314914	-	exonic_antisense	PCBP1	+	5093	poly(rC) binding protein 1	AGATGGTGGCTTTCTTTGGACCCTTGACATCAACCAGTTACTATTTGCCAGAGACAGACT
CUST_36418_PI429285431	1.48e-07	2.67518	lncRNA		CUST_36419_PI429285431	CUST_36419_PI429285431	FALSE	lncRNA	n344934|NULL|lincRNA|Homosapiens|HumanlincRNA|ScriptureReconstructionLincRNAsByLuo[unpublished]|linc_luo_483|NULL|-1.2951200|-0.3220261		NONCODERv3	-				chr6	167397322	167399007	-	intergenic					ACTTTTCCTTTTGTCTGTTGGCTGCAGCAAGCATCCTAAGAACTGCTCCAATGTCTAAGC
LNCA_21_P0014266	4.76e-05	2.0611	lncRNA	LOC100507417
CUST_10130_PI429285431	6.7e-07	0.418777	lncRNA		CUST_1013_PI429285431	CUST_1013_PI429285431	FALSE	lncRNA	"transcript_id ""ENST00000419650.1"" | genecode_v17"		gencode_v17	-				chr2	108370601	108371177	+	intergenic					ACAGCCGCCCCTTTTATGGAATCATCCAGCGTCCAATCTCAAAATACATATTGGTGTTAA
CUST_35483_PI429285431	3.63e-06	2.68955	lncRNA		CUST_35500_PI429285431	CUST_35500_PI429285431	FALSE	lncRNA	n342602|BC041902|mRNAlikelncRNA|Homosapiens|HumanlncRNA|JounralRNA|5103|NULL|-1.2778900|-0.3951005		NONCODERv3	-				chr4	68919225	68922016	+	exonic_antisense	TMPRSS11F	-	389208	"transmembrane protease, serine 11F"	GCCCCAACTTCTGACTCTTTGGACTGTACCATAAAAAGGAAATAAACCTTTACTATATTA
CUST_27138_PI429285431	0.000691299	0.479568	lncRNA		CUST_27138_PI429285431	CUST_27138_PI429285431	FALSE	lncRNA	n324255|NULL|mRNAlikelncRNA|Homosapiens|vegalncRNA|GENCODE|OTTHUMT00000325234|http://vega.sanger.ac.uk/Homo_sapiens/Transcript/Summary?db=core;t=OTTHUMT00000325234|0.4577750|-0.1902053		NONCODERv3	-				chr7	2723992	2726991	-	intronic_antisense	AMZ1	+	155185	archaelysin family metallopeptidase 1	ATGTTCTGTCCTAAAGCTGCTTATTACAAAGAAGTTGTGGAATATCCTCCCCCCAACCCC
CUST_9797_PI429285431	2.2e-07	0.431157	lncRNA		CUST_9797_PI429285431	CUST_9797_PI429285431	FALSE	lncRNA	lnc-SGCG-1:1		lncipedia2.1	-				chr13	23744691	23744954	+	intergenic					AGAAAGTGTGTCTTTCTGAATTGCTGCTTCTCCTCTTCCTGTTGTTGCCTTCTTCTTCTG
LNCA_21_P0001146	3.5e-08	0.424684	lncRNA	XLOC_000884	LNCA_21_P0003167	LNCA_21_P0003167	FALSE	lncRNA			Agilent_HUMAN_G3V2	-	XLOC_003239			chr3	127095096	127104743	-	intergenic					AACACCTCCTCCCACAGGAACTCTCTTGTGGCCACATCCAGTTGCAGAAGAGGCTGGGAA
CUST_9871_PI429285431	3.55e-08	0.298377	lncRNA		CUST_9871_PI429285431	CUST_9871_PI429285431	FALSE	lncRNA	lnc-KIAA1704-2:1		lncipedia2.1	-				chr13	45657173	45657412	+	intergenic					TAGCAAGCATATGAACCTTCTTCAACACTTGCCGTCAGAAATTGGCTCTCCTGGCTTCTT
LNCA_21_P0002935	4.19e-07	0.267691	lncRNA	XLOC_002592	LNCA_21_P0005846	LNCA_21_P0005846	FALSE	lncRNA			Agilent_HUMAN_G3V2	-	XLOC_007102			chr8	65309183	65309242	-	intergenic					ATTAATACAGTGTGTTTGTGCTCTTTCTGGTTTATCTCCCTTTTCTCCTCTCCCCAAGAC
CUST_44419_PI429285431	8.43e-08	2.24066	lncRNA		CUST_44419_PI429285431	CUST_44419_PI429285431	FALSE	lncRNA	"gi|195539370|ref|NR_003135.2| Homo sapiens centrosomal protein 170kDa pseudogene 1 (CEP170P1), non-coding RNA"		ncbi	-													GCAGCATAGTGTTGACGTACGCAAAACAAGACAGCTTGGTCAGCTACAAAAAACAAAAAA
LNCA_21_P0005453	2.32e-08	0.473141	lncRNA	XLOC_006312	LNCA_21_P0008938	LNCA_21_P0008938	FALSE	lncRNA			Agilent_HUMAN_G3V2	-	XLOC_011721			chr16	51558947	51559006	+	intergenic					TTTGAAAGAACAATCAGGATGCCCTAGCTCCTGGGGCCTTTTCCCAGCTCCCAAGCCTGG
CUST_37774_PI429285431	0.000417185	0.41462	lncRNA		CUST_37774_PI429285431	CUST_37774_PI429285431	FALSE	lncRNA	n346284|NULL|lincRNA|Homosapiens|HumanlincRNA|ScriptureReconstructionLincRNAsByLuo[unpublished]|linc_luo_1834|NULL|-1.3400600|-0.2409505		NONCODERv3	-				chr16	87915154	87915849	-	intergenic					AAGGCTTCCTCCCTTTGCTTTTATCTTATTTTCTTGTTTAATAAAGATACGCCTGTGTGA
CUST_1278_PI429285431	1.13e-08	0.275467	lncRNA		CUST_1278_PI429285431	CUST_1278_PI429285431	FALSE	lncRNA	"transcript_id ""ENST00000457178.1"" | genecode_v17"		gencode_v17	-				chr2	241166977	241167405	-	intergenic					TTTAGATTAAGTGCTGAGAGGTGTAGCTCTTCCTATACCTGCTGGACTACAGAAAGGCAG
CUST_36312_PI429285431	1.34e-07	2.20268	lncRNA		CUST_36312_PI429285431	CUST_36312_PI429285431	FALSE	lncRNA	n344839|NULL|lincRNA|Homosapiens|HumanlincRNA|ScriptureReconstructionLincRNAsByLuo[unpublished]|linc_luo_388|NULL|-1.3208700|-0.3971873		NONCODERv3	-				chr5	98265712	98267122	+	intergenic					TGAATGAGGATCTACTCTCTACCTAACAGCTTAGCCAAAACTCACCCTTTCTTATAACCA
LNCA_21_P0014422	2.98e-06	0.450695	lncRNA	LOC646513
CUST_33_PI429285431	6.04e-05	0.402642	lncRNA		CUST_3301_PI429285431	CUST_3301_PI429285431	FALSE	lncRNA	"transcript_id ""ENST00000521428.1"" | genecode_v17"		gencode_v17	-				chr8	127510394	127510882	+	intergenic					TTGTTTTGGTTTTGTTTTACCCCTGCTTTCACAAATGCCTCCCCGAGTGGTGACACATCA
CUST_15020_PI429285431	1.58e-06	2.96975	lncRNA		CUST_15020_PI429285431	CUST_15020_PI429285431	FALSE	lncRNA	lnc-OR4F16-3:1		lncipedia2.1	-				chr1	689043	689263	-	intergenic					CTTGCTCTGTTGCTTAGGCTACAGTACAGTGACATGATCATGGTTCACTGTAGCCTCAAA
LNCA_21_P0006125	7.25e-05	0.499003	lncRNA	XLOC_007279	LNCA_21_P0009836	LNCA_21_P0009836	FALSE	lncRNA			Agilent_HUMAN_G3V2	-	XLOC_013483			chr20	22203822	22203881	+	intergenic					CTTCAATAGTGAATTAGGTTCCCTCTACCATCTGAAATGTTACAGTTCGATAAAATAGGT
CUST_32875_PI429285431	4.71e-05	3.34837	lncRNA		CUST_32875_PI429285431	CUST_32875_PI429285431	FALSE	lncRNA	n339541|AK092233|mRNAlikelncRNA|Homosapiens|HumanlncRNA|JounralRNA|1983|NULL|-0.2743520|-0.1172673		NONCODERv3	-				chr21	46926023	46928930	-	exonic_antisense	COL18A1	+	80781	"collagen, type XVIII, alpha 1"	GAAGCTTGAGCTCACTTTTCTTTAAACCCAAGACTGCTCACAAAAGTATTTTACTAAACT
CUST_42989_PI429285431	0.000443395	2.81883	lncRNA		CUST_42989_PI429285431	CUST_42989_PI429285431	FALSE	lncRNA	ENST00000391162 ncrna:snoRNA chromosome:GRCh37:10:101996913:101997059:-1 gene:ENSG00000212464 gene_biotype:snoRNA transcript_biotype:snoRNA		ensembl.GRCh37.72	-				chr10	101996913	101997059	-	intronic_sense	CWF19L1	-	55280	"CWF19-like 1, cell cycle control (S. pombe)"	AATATCGGAGATGGCAAAGGCTTGTGACGGAGATATCTCTCTTAAGCCTTTCCTGCATCA
CUST_1081_PI429285431	1.9e-08	3.28227	lncRNA		CUST_10813_PI429285431	CUST_10813_PI429285431	FALSE	lncRNA	lnc-RP4-725G10.1.1-3:1		lncipedia2.1	-				chr7	56550668	56552601	-	intergenic					TGATCGTATCTTGTAATTATGTCACTACCTCCCCCTAAGATGCTGGCTTCATGCTTCGTC
CUST_1029_PI429285431	6.59e-08	2.35254	lncRNA		CUST_10296_PI429285431	CUST_10296_PI429285431	FALSE	lncRNA	lnc-TRAPPC12-3:1		lncipedia2.1	-				chr2	2876131	2876870	+	intergenic					ACCTACATAATCTGCCTACTATCAGCACTCCCTATTTACAAGAGCTCAGACAAGGAGGAG
LNCA_21_P0002208	2.18e-07	0.407952	lncRNA	XLOC_001454	LNCA_21_P0004847	LNCA_21_P0004847	FALSE	lncRNA			Agilent_HUMAN_G3V2	-	XLOC_005188			chr6	17332720	17332779	+	intergenic					TTGTCTCCTGGCTTCTAATGTTGCAGTGAAGAAGTCAGCTACAAATCTAATTGCCGTTTC
CUST_2771_PI429285431	1.03e-07	0.474453	lncRNA		CUST_2771_PI429285431	CUST_2771_PI429285431	FALSE	lncRNA	"transcript_id ""ENST00000419463.1"" | genecode_v17"		gencode_v17	-				chr7	17414491	17415327	+	intergenic					AAGTGAAGTCTTCATCTCCATTCCCAACAGTCCCCATTCTACTTGCAGAAAGGTTGCTTA
CUST_18073_PI429285431	0.000170479	0.459907	lncRNA		CUST_18073_PI429285431	CUST_18073_PI429285431	FALSE	lncRNA	lnc-TMEM130-1:1		lncipedia2.1	-				chr7	98286688	98287025	-	intergenic					AAGTCAAGAAATCCTCCTTCCTGCTTGTACCAGTTGGCAGTGGGTTTTCTGGCATTTGTA
CUST_51503_PI429285431	3.02e-06	0.398917	lncRNA		CUST_51503_PI429285431	CUST_51503_PI429285431	FALSE	lncRNA	hg19_lincRNAsTranscripts_TCONS_l2_00010286 range=chr16:75538524-75539214 5'pad=0 3'pad=0 strand=- repeatMasking=none		UCSC	-				chr16	75538524	75538846	-	intergenic					TACAATGTAAGGGCGCTTCTCATTGTCCAGCTCCTTTGTTTCTGTGTGTTACTGTTCGTC
CUST_16620_PI429285431	1.15e-06	0.351114	lncRNA		CUST_16620_PI429285431	CUST_16620_PI429285431	FALSE	lncRNA	lnc-RP11-890B15.2.1-2:1		lncipedia2.1	-				chr11	130654163	130654500	-	intergenic					AACTGCAATTCATGGTTCTCTCTCTGTAAGTAACTGTCTGCCCACAAAGCAGCTGTGTTC
LNCA_21_P0001995	0.000765494	0.44937	lncRNA	XLOC_001954	LNCA_21_P0004484	LNCA_21_P0004484	FALSE	lncRNA	NR_024424	NR_024424	Agilent_HUMAN_G3V2	-	LOC255167	uncharacterized LOC255167		chr5	6583858	6583914	+	intergenic					AGCATCTCTTTCCCCACGCTGACCTCCCCCATAGACTCCGGATGGGAGTAAATGAGGGTA
CUST_6920_PI429285431	6.56e-08	2.28508	lncRNA		CUST_6920_PI429285431	CUST_6920_PI429285431	FALSE	lncRNA	"transcript_id ""ENST00000442403.1"" | genecode_v17"		gencode_v17	-				chr22	17350368	17350867	+	intergenic					CATTTCTCACTGGATCAGTCAACAAGATTTGAGTACTTTCTGTGTGCTCTGCATCATTCT
CUST_6981_PI429285431	3.63e-07	0.421755	lncRNA		CUST_6981_PI429285431	CUST_6981_PI429285431	FALSE	lncRNA	"transcript_id ""ENST00000450365.1"" | genecode_v17"		gencode_v17	-				chr22	34604130	34604648	-	intergenic					CAAAAGCATAACTGTGCATTCAATATTCATAGAAAGGGTCTGTGTGTGGTAGGAAAGAGA
CUST_16051_PI429285431	4.5e-10	0.390766	lncRNA		CUST_16051_PI429285431	CUST_16051_PI429285431	FALSE	lncRNA	lnc-TBC1D22A-1:2		lncipedia2.1	-				chr22	47604255	47604852	+	intergenic					TCAGAGCAAAAGGCAACATGCTCTCCCGAGGTAAGATCCTAACTGTTGTCAGGAACATAT
CUST_2390_PI429285431	1.31e-05	0.3708	lncRNA		CUST_23912_PI429285431	CUST_23912_PI429285431	FALSE	lncRNA	lnc-LRP11-1:1		lncipedia2.1	-				chr6	150119057	150119492	-	intronic_antisense	PCMT1	+	5110	protein-L-isoaspartate (D-aspartate) O-methyltransferase (EC:2.1.1.77)	GACCACTCACTGCACAATTCTCTCCCTCATATGCATATTTTATTTTCCTTCCAATAGATA
CUST_40853_PI429285431	0.000384859	3.87	lncRNA		CUST_40853_PI429285431	CUST_40853_PI429285431	FALSE	lncRNA	n410628|NR_037867|lncRNA|Homosapiens||RefGeneNoncode|NR_037867||0.1364550|-0.2345765		NONCODERv3	-				chr4	185767449	185767838	-	intergenic					GGAGAGAAGGGAGGGGTTTAGACATCAGGGAGCCAAGTTCTACAGCATCTTCTAGATCCA
CUST_17107_PI429285431	0.000130216	0.407113	lncRNA		CUST_17107_PI429285431	CUST_17107_PI429285431	FALSE	lncRNA	lnc-TMEM30B-3:3		lncipedia2.1	-				chr14	62037204	62037853	-	intergenic					GTTACTCCAGGGACTTCTCTTCCCGTTTCCCCTAAAGCATTTGACAGTTAGATCTTGGAA
CUST_36734_PI429285431	0.00778981	0.465599	lncRNA		CUST_36734_PI429285431	CUST_36734_PI429285431	FALSE	lncRNA	n345217|NULL|lincRNA|Homosapiens|HumanlincRNA|ScriptureReconstructionLincRNAsByLuo[unpublished]|linc_luo_766|NULL|-1.4316600|-0.1841630		NONCODERv3	-				chr13	40762764	40763710	+	intergenic					GATAATATTTCCTCCCCTGAACCACTCATCCATATCTGCTCTATTCAGATATTTGTGCCT
CUST_45462_PI429285431	1.53e-06	0.438478	lncRNA		CUST_45462_PI429285431	CUST_45462_PI429285431	FALSE	lncRNA	"gi|310124547|ref|XR_110095.1| PREDICTED: Homo sapiens FP7915 protein (LOC401561), misc_RNA"		ncbi	-				Chr9	139510734	139511270	-	intergenic					AATGGCCCAGATGGCTGGAGACCTCTTCCTTTGTCTCCTCTGTCTCCAAGATCCAGGAGC
CUST_35884_PI429285431	1.19e-08	7.9752	lncRNA		CUST_3589_PI429285431	CUST_3589_PI429285431	FALSE	lncRNA	"transcript_id ""ENST00000436340.1"" | genecode_v17"		gencode_v17	-				chr10	3308195	3308657	+	intergenic					ATATGAGGAACTTAGCAAATGGACTCATTCTTCATTTTCTTCTTCCTCTCTCTCCTGATT
LNCA_21_P0008357	9.29e-08	0.457767	lncRNA	XLOC_010878	LNCA_21_P0011630	LNCA_21_P0011630	FALSE	lncRNA	NR_029406	NR_029406	Agilent_HUMAN_G3V2	-	FLJ43681	ribosomal protein L23a pseudogene		chr17	81177470	81177529	+	intergenic					AAGAACCCAACTTTTAGATCTAGAGTGATGTCAGCATGACATTGATTTCCTGAGGCCCAG
CUST_33304_PI429285431	4.94e-09	2.92942	lncRNA		CUST_33351_PI429285431	CUST_33351_PI429285431	FALSE	lncRNA	n340069|AF143875|mRNAlikelncRNA|Homosapiens|HumanlncRNA|JounralRNA|2524|NULL|-0.9734830|-0.3340646		NONCODERv3	-				chr10	74994300	74995425	-	exonic_antisense	FAM149B1	+	317662	"family with sequence similarity 149, member B1"	GGTACACAACAGAAGCTGGCCTTTTCTCTCCCACAGAACTGGAATAAAACATTTGTCCCT
CUST_2624_PI429285431	0.000500427	0.361302	lncRNA		CUST_26242_PI429285431	CUST_26242_PI429285431	FALSE	lncRNA	lnc-RASAL1-1:1		lncipedia2.1	-				chr12	113455204	113455778	-	intergenic					CTCTCCCCGGCGATTTAACTGATCCTGAAAAGTGGTGAGAGGACTGAGGAAGACAACCAG
CUST_6399_PI429285431	3.55e-06	0.389605	lncRNA		CUST_6399_PI429285431	CUST_6399_PI429285431	FALSE	lncRNA	"transcript_id ""ENST00000599269.1"" | genecode_v17"		gencode_v17	-				chr19	23252051	23252588	-	intergenic					AGATGGCTCTCCTCGGCTGCAGAACCGCTAAGATCCAGTAGAGGATGCATAATCTCACCG
LNCA_19_P00321356	8.93e-10	0.474989	lncRNA	XLOC_l2_007834	LNCA_19_P00328190	LNCA_19_P00328190	FALSE	lncRNA	NR_027696	NR_027696	Agilent_HUMAN_G3V2	-	FLJ39653	uncharacterized FLJ39653	GO:0016020(membrane)|GO:0016021(integral to membrane)	chr4	16259107	16259166	+	intergenic					TGAGTCACGTCTCCTTTCCCTTACCTTCTCCCTTTGTCTGACATACCCAGTTGCTGTAGA
CUST_8804_PI429285431	6.26e-05	2.72854	lncRNA		CUST_8804_PI429285431	CUST_8804_PI429285431	FALSE	lncRNA	lnc-LGALSL-2:1		lncipedia2.1	-				chr2	64456631	64457136	+	intergenic					TTTGCTGGAACTTTTCAGGCCTGGTTGAAGATGGCTGAGCGTAAAACAGAATGCAAGTCA
CUST_29022_PI429285431	3.37e-08	0.414134	lncRNA		CUST_29022_PI429285431	CUST_29022_PI429285431	FALSE	lncRNA	n326509|NULL|mRNAlikelncRNA|Homosapiens|vegalncRNA|GENCODE|OTTHUMT00000029470|http://vega.sanger.ac.uk/Homo_sapiens/Transcript/Summary?db=core;t=OTTHUMT00000029470|-1.1062500|-0.2980902		NONCODERv3	-				chr1	96492212	96494205	-	intergenic					TTTCTCATTAACCAAGAAAAGTGGCTCTTCCCATGGCAGTCTGATTTTCAGCCTGCCCAA
CUST_43122_PI429285431	0.00443943	2.38841	lncRNA		CUST_43122_PI429285431	CUST_43122_PI429285431	FALSE	lncRNA	ENST00000586356 havana:3prime_overlapping_ncrna chromosome:GRCh37:19:11411453:11435117:-1 gene:ENSG00000267174 gene_biotype:3prime_overlapping_ncrna transcript_biotype:3prime_overlapping_ncrna		ensembl.GRCh37.72	-				chr19	11411453	11412107	-	exonic_antisense	TSPAN16	+	26526	tetraspanin 16	CACGGAATCTCTGTCTGCACAAAAGGGGCACATTTAATTTTCTGTTTTTTAAATAAAGGT
LNCA_21_P0011254	5.83e-06	0.167854	lncRNA	LOC100507043	LNCA_32_P131143	LNCA_32_P131143	FALSE	lncRNA	NR_024482	NR_024482	Agilent_HUMAN_G3V2	-	CECR5-AS1	CECR5 antisense RNA 1 (non-protein coding)		chr22	17646234	17646293	+	bidirectional	CECR5	-	27440	"cat eye syndrome chromosome region, candidate 5"	AAGGACACCAACGGCAGCATCAGCAAGTCCGTGTTGTCTCCCAAATAAGTGGTGTTCTCC
CUST_11091_PI429285431	3.71e-14	0.448449	lncRNA		CUST_11114_PI429285431	CUST_11114_PI429285431	FALSE	lncRNA	lnc-SULF2-2:1		lncipedia2.1	-				chr20	46528127	46531126	-	intergenic					AACCCTCAAACTTCAATGGACACAGCACATCCTCCCCACAGTTAAACAGCAGCATGGGCT
CUST_37933_PI429285431	3.09e-05	0.399708	lncRNA		CUST_37933_PI429285431	CUST_37933_PI429285431	FALSE	lncRNA	n346477|NULL|lincRNA|Homosapiens|HumanlincRNA|ScriptureReconstructionLincRNAsByLuo[unpublished]|linc_luo_2027|NULL|-1.3013700|-0.2161671		NONCODERv3	-				chr2	110744702	110745082	+	intergenic					GCACGCATAGCTGCCCCAGATCCCGGAAGAAAATCTCTCCCACACCACTGTAGTCAGAGA
CUST_18309_PI429285431	1.8e-06	0.477947	lncRNA		CUST_18309_PI429285431	CUST_18309_PI429285431	FALSE	lncRNA	lnc-ITSN1-2:2		lncipedia2.1	-				chr21	35347538	35350537	+	intergenic					TCCCCCACCCTTGTCTTTCTATGTGAGATTGTATTGCAGGGCTCACATTTATTCTCTCAG
LNCA_32_P135517	6.14e-08	0.492456	lncRNA	LOC100506105
CUST_38356_PI429285431	4.43e-08	0.462068	lncRNA		CUST_38356_PI429285431	CUST_38356_PI429285431	FALSE	lncRNA	n382124|NULL|lncRNA|Homosapiens||UCSCGeneNoncode|uc001vvv.1||-0.7560800|-0.1990332		NONCODERv3	-				chr14	19919491	19920060	-	intergenic					GAGCTTCGGAGAAGCAGTGGTGGGTTCCATGTGATGGTGGAGTAGGAGGCAGGTCTCCGC
CUST_33900_PI429285431	9.48e-07	0.351209	lncRNA		CUST_33973_PI429285431	CUST_33973_PI429285431	FALSE	lncRNA	n340781|AF014455|mRNAlikelncRNA|Homosapiens|HumanlncRNA|JounralRNA|3244|NULL|-1.0954600|-0.5669844		NONCODERv3	-				chr17	57862173	57862409	+	intronic_sense	VMP1	+			TTGTGACTTGTTTATTCTATAAGCTGTATAACCCCAAAGAAAAATTAAAGATACTTTAGG
CUST_24938_PI429285431	5.42e-05	0.411192	lncRNA		CUST_24976_PI429285431	CUST_24976_PI429285431	FALSE	lncRNA	lnc-CDK2AP1-1:2		lncipedia2.1	-				chr12	123745373	123746168	-	exonic_sense	CDK2AP1	-	8099	cyclin-dependent kinase 2 associated protein 1	AAGGTATGAGAGAGGAGACAAACGGAAACCATTCTCCCTTATCTCCAGCTCCAAATTTCC
CUST_17012_PI429285431	7.85e-08	0.425341	lncRNA		CUST_17012_PI429285431	CUST_17012_PI429285431	FALSE	lncRNA	lnc-C20orf78-1:2		lncipedia2.1	-				chr20	18774812	18776762	-	intergenic					TGTCTTCTTGGATGGGCTCTCCACATCTTCCACCACGAAGTAAAAACAATTCTTGTGGGT
LNCA_21_P0011482	0.000684384	2.33555	lncRNA	XLOC_l2_005490	LNCA_32_P75425	LNCA_32_P75425	FALSE	lncRNA	NR_037596	NR_037596	Agilent_HUMAN_G3V2	-	FLJ14186	uncharacterized LOC401149		chr4	120326733	120326792	-	intergenic					GGAGTGAGTTTCTGCACCAAGCCCGAATTTTTTATTTTATTTTCCTTATTATTTGGTGTT
CUST_21083_PI429285431	2.32e-08	2.60293	lncRNA		CUST_21083_PI429285431	CUST_21083_PI429285431	FALSE	lncRNA	lnc-EIF4E3-1:1		lncipedia2.1	-				chr3	71625646	71626184	-	intronic_sense	FOXP1	-	27086	forkhead box P1	TCCTTCACCCTTGGATTGGGGAGAGTCTTACAATGAATAACTCAGAAAAAAGTTTTCAAA
CUST_35439_PI429285431	3.92e-11	0.410601	lncRNA		CUST_35465_PI429285431	CUST_35465_PI429285431	FALSE	lncRNA	n342550|CR618381|mRNAlikelncRNA|Homosapiens|HumanlncRNA|JounralRNA|5048|NULL|-1.0480700|-0.3050499		NONCODERv3	-				chr20	23052183	23053358	-	intergenic					CATGAATGCAAGAAAATCAGTATCTGTTCTAGGTATGTTATTCTGGTCCTGCTTATATCT
LNCA_19_P00807507	8.4e-06	0.455076	lncRNA	XLOC_009483	LNCA_21_P0000956	LNCA_21_P0000956	FALSE	lncRNA			Agilent_HUMAN_G3V2	-	XLOC_000087			chr1	21917621	21917680	+	intergenic					TCCTTGCCCAACCCATGGGGGCCTTGCAATGATTAATAATAATAATGATGATGATAATGG
CUST_39613_PI429285431	4.78e-08	2.23938	lncRNA		CUST_39613_PI429285431	CUST_39613_PI429285431	FALSE	lncRNA	n387672|NULL|lncRNA|Homosapiens||UCSCGeneNoncode|uc011kzm.1||2.9841100|-0.1975975		NONCODERv3	-				chr8	22497883	22499721	-	intronic_sense	BIN3	-	55909	bridging integrator 3	GGGTTTGGTTTGGGCCAAGTAGTGCTTAGTTTTAATTTTCTCTTTCTGGAAATAAATACT
LNCA_21_P0011401	7.13e-07	2.15537	lncRNA	XLOC_l2_004611	LNCA_32_P235159	LNCA_32_P235159	FALSE	lncRNA	NR_024322	NR_024322	Agilent_HUMAN_G3V2	-	MSL3P1	male-specific lethal 3 homolog (Drosophila) pseudogene 1	"""GO:0005634(nucleus)|GO:0006355(regulation of transcription, DNA-dependent)|GO:0016568(chromatin modification)"""	chr2	234774439	234774498	-	intergenic					TTCATGGAAGTGTACATAGGTTAGGCCATTTCAGCAGACATTGCAGTTAGTCAGCAAGAA
CUST_25080_PI429285431	7.1e-07	0.125767	lncRNA		CUST_25080_PI429285431	CUST_25080_PI429285431	FALSE	lncRNA	lnc-CHAC2-4:1		lncipedia2.1	-				chr2	52637116	52638054	+	intergenic					CATGTAGTCTCCCTATAACTGATGAACGTGCATGTTTCTTTTCTCCGATAAATTTTATGT
CUST_3589_PI429285431	6.76e-07	0.491619	lncRNA		CUST_35928_PI429285431	CUST_35928_PI429285431	FALSE	lncRNA	n344569|NULL|lincRNA|Homosapiens|HumanlincRNA|ScriptureReconstructionLincRNAsByLuo[unpublished]|linc_luo_117|NULL|-1.3364000|-0.2814666		NONCODERv3	-				chr21	35303857	35306856	+	intergenic					TGTCACCTCTCCCAGGCAGAATTACATTCTGAAGGCATCTCTAATTGAGATTGCTCCATG
CUST_47837_PI429285431	1.27e-07	2.24838	lncRNA		CUST_47837_PI429285431	CUST_47837_PI429285431	FALSE	lncRNA	"gi|410170963|ref|XR_171125.1| PREDICTED: Homo sapiens vesicle-trafficking protein SEC22b-like (LOC100996517), misc_RNA"		ncbi	-													TTCTTAAATGAAGATGTCTTCTTTCAGTCTGGCCGGGACCTTCAACAGTATCAGAGTCAG
CUST_19253_PI429285431	4.52e-07	0.427754	lncRNA		CUST_19253_PI429285431	CUST_19253_PI429285431	FALSE	lncRNA	lnc-BPIFB1-1:1		lncipedia2.1	-				chr20	31941571	31942115	+	intergenic					AGAGAAATAACCTGGATGCAAGAATCACCAAACTAACCTACTCCCACCGGCCAGACATAA
CUST_37600_PI429285431	2.48e-06	5.44256	lncRNA		CUST_37600_PI429285431	CUST_37600_PI429285431	FALSE	lncRNA	n346076|NULL|lincRNA|Homosapiens|HumanlincRNA|ScriptureReconstructionLincRNAsByLuo[unpublished]|linc_luo_1626|NULL|-1.2946300|-0.1619927		NONCODERv3	-				chr4	9534031	9534415	+	intergenic					GACGCGCCGCGGCCAGGCAGGGAGGAGACCGGCACCCAGACAGGTGGCGACGGCAGAGGA
CUST_32416_PI429285431	6.36e-05	0.324073	lncRNA		CUST_32428_PI429285431	CUST_32428_PI429285431	FALSE	lncRNA_mRNA	n339022|S77094|mRNAlikelncRNA|Homosapiens|HumanlncRNA|JounralRNA|1451|NULL|8.8449000|-0.1223673		NONCODERv3	"gi|189571659|ref|NM_000079.3|,gi|189571658|ref|NM_001039523.2|"				chr2	175612599	175614274	-	exonic_sense	CHRNA1	-	1134	"cholinergic receptor, nicotinic, alpha 1 (muscle)"	TTAGTTCTGCTGTCTCCCTGAAGAGTGAACCCTCTTTAGTAAATGAAACTAATCACTAAA
CUST_23230_PI429285431	3.92e-05	2.40118	lncRNA		CUST_23230_PI429285431	CUST_23230_PI429285431	FALSE	lncRNA	lnc-C2orf42-3:21		lncipedia2.1	-				chr2	70313256	70313821	-	bidirectional	PCBP1	+	5093	poly(rC) binding protein 1	GAATTTTCCACACTCCTTGACAGAGGTGCTTAACCCTTATCCATCAGCATTCTCAGACAG
CUST_20395_PI429285431	3.24e-08	2.63439	lncRNA		CUST_20395_PI429285431	CUST_20395_PI429285431	FALSE	lncRNA	lnc-IL15RA-1:2		lncipedia2.1	-				chr10	5987618	5987998	-	intergenic					TGAGGACGCGGGACCGACCCCATTATGTGTGTGTGAGGCTGATTAAAGTGTTACCTGTCA
CUST_32045_PI429285431	2.57e-09	0.418975	lncRNA		CUST_32045_PI429285431	CUST_32045_PI429285431	FALSE	lncRNA	n338606|U82313|mRNAlikelncRNA|Homosapiens|HumanlncRNA|JounralRNA|1012|NULL|1.6631500|-0.2846408		NONCODERv3	-				chr13	26545851	26546313	-	intronic_antisense	ATP8A2	+	51761	"ATPase, aminophospholipid transporter-like, class I, type 8A, member 2 (EC:3.6.3.1)"	ATGCCTCTCCATGTGTGAGTCTATGTTAGCTGTACTCTCAAGCAATGAGATAAACTGCCC
LNCA_24_P16124	0.00067624	2.06804	lncRNA	IFITM4P
CUST_20801_PI429285431	8.08e-08	0.340976	lncRNA		CUST_20801_PI429285431	CUST_20801_PI429285431	FALSE	lncRNA	lnc-RPS21-1:2		lncipedia2.1	-				chr20	60931248	60931937	+	intronic_antisense	LAMA5	-	3911	"laminin, alpha 5"	CAGCTCAGCTGCCAGTGCTGACCTTTCCGCTGCTACATGGTTCTGTGCAGAAAGAAAAAA
CUST_16471_PI429285431	2.44e-06	2.77469	lncRNA		CUST_16471_PI429285431	CUST_16471_PI429285431	FALSE	lncRNA	lnc-OBFC2A-1:1		lncipedia2.1	-				chr2	192562533	192565316	+	intergenic					CCTAAACACACAGAGGAGAATTACTTCAAGTATTTTTAAAACACAGTCACTTGTCTATGC
CUST_20736_PI429285431	0.000895908	0.399993	lncRNA		CUST_20736_PI429285431	CUST_20736_PI429285431	FALSE	lncRNA	lnc-FAM186B-1:1		lncipedia2.1	-				chr12	49971194	49971763	-	intergenic					GTGACTACCCTAAATTGGGCCACCAACTAATCTCCCTGGCTTCTGTTTTACTCTTTCAAT
CUST_13659_PI429285431	5.34e-07	0.406908	lncRNA		CUST_13659_PI429285431	CUST_13659_PI429285431	FALSE	lncRNA	lnc-MFSD4-2:1		lncipedia2.1	-				chr1	205751861	205752663	+	intergenic					ACATCAAACTATAGTTTTCACTGCCTTGGTTGTCACATTTGCCTCCTTCTGTGGCTACCC
CUST_27681_PI429285431	5.24e-07	0.486462	lncRNA		CUST_27681_PI429285431	CUST_27681_PI429285431	FALSE	lncRNA	n324888|NULL|mRNAlikelncRNA|Homosapiens|vegalncRNA|GENCODE|OTTHUMT00000158284|http://vega.sanger.ac.uk/Homo_sapiens/Transcript/Summary?db=core;t=OTTHUMT00000158284|-1.2249600|-0.4611430		NONCODERv3	-				chr21	19424711	19425179	+	intronic_sense	CHODL	+	140578	chondrolectin	GTAGGAAATCAGTTACGCATCTTAGGACCTTCCTTCCCATCTTCCCCAGAACTCTGATTT
CUST_48465_PI429285431	2e-06	2.80434	lncRNA		CUST_48465_PI429285431	CUST_48465_PI429285431	FALSE	lncRNA	hg19_lincRNAsTranscripts_TCONS_l2_00001801 range=chr1:224139108-224142353 5'pad=0 3'pad=0 strand=- repeatMasking=none		UCSC	-				chr1	224139108	224140168	-	intergenic					CGGCAGCCTCTTGGCTTCTAATTTGTTTATCTTTTGTGTATAAATCCCAAAATATGGAAT
CUST_13416_PI429285431	4.35e-09	2.14181	lncRNA		CUST_13416_PI429285431	CUST_13416_PI429285431	FALSE	lncRNA	lnc-GNAI3-1:1		lncipedia2.1	-				chr1	110139982	110140577	+	intergenic					CCAAGAAAATTATTGAAAACTGTTGGGTCACATAACATTCCTACACTTTGGATACAGAGT
CUST_13639_PI429285431	2.15e-05	0.498738	lncRNA		CUST_13639_PI429285431	CUST_13639_PI429285431	FALSE	lncRNA	lnc-ARFGEF2-2:8		lncipedia2.1	-				chr20	47138445	47138508	+	intergenic					CTCCAGCTCCTTGACCCTCATAAACAATCCCTTCTTATGAAATGTAGCAGTCAGGAAAAC
CUST_4225_PI429285431	0.000132002	2.59359	lncRNA		CUST_42259_PI429285431	CUST_42259_PI429285431	FALSE	lncRNA	ENST00000365304 ncrna:rRNA chromosome:GRCh37:2:133010727:133010878:-1 gene:ENSG00000202174 gene_biotype:rRNA transcript_biotype:rRNA		ensembl.GRCh37.72	-				chr2	133010727	133010878	-	intergenic					TGGGAGAATTAATGTGAACTGCAAGACACGTTGATCATCGACTCTTCGAATGCACTTGCG
CUST_12078_PI429285431	0.000715746	2.04557	lncRNA		CUST_12078_PI429285431	CUST_12078_PI429285431	FALSE	lncRNA	lnc-TMEM140-1:1		lncipedia2.1	-				chr7	134856452	134857454	+	bidirectional	C7orf49	-	78996	chromosome 7 open reading frame 49	GAGCCCGGCCTCGGTTTGTTATCCTAATTAAGTGGAAAATTAAGAAAATAATAGAATAGC
CUST_41827_PI429285431	2.72e-08	0.482657	lncRNA		CUST_41827_PI429285431	CUST_41827_PI429285431	FALSE	lncRNA	ENST00000385292 ncrna:miRNA chromosome:GRCh37:14:101521738:101521848:1 gene:ENSG00000208027 gene_biotype:miRNA transcript_biotype:miRNA		ensembl.GRCh37.72	-				chr14	101521738	101521848	+	intergenic					ATTCATCAAAGCGAGTCATACACGGCTCTCCTCTCTTTTAGTGTCAAATTCTGCCTCGGA
CUST_22786_PI429285431	0.000247709	2.97135	lncRNA		CUST_22786_PI429285431	CUST_22786_PI429285431	FALSE	lncRNA	lnc-FAM138A-5:1		lncipedia2.1	-				chr1	267096	269608	-	intergenic					ACAACATATGTGTCAGGAAAAGACAATACACTTCAGACTTTGAGAGTTTACATCAGAAAG
LNCA_32_P46238	4.19e-07	0.499525	lncRNA	LOC339240
CUST_49764_PI429285431	3.53e-07	3.43675	lncRNA		CUST_49765_PI429285431	CUST_49765_PI429285431	FALSE	lncRNA	hg19_lincRNAsTranscripts_TCONS_l2_00026562 range=chr7:51453002-51461071 5'pad=0 3'pad=0 strand=- repeatMasking=none		UCSC	-				chr7	51459002	51460844	-	intergenic					TATTTTCCGAAAAGTGAAAAGCTCTGAAGGTCCCACACTTCATGGTATGTACAGGGGCTC
CUST_4017_PI429285431	2e-06	0.372716	lncRNA		CUST_4017_PI429285431	CUST_4017_PI429285431	FALSE	lncRNA	"transcript_id ""ENST00000528781.1"" | genecode_v17"		gencode_v17	-				chr11	76336506	76337336	-	intergenic					AGAAAAAGGCCTTCAGAGCTACGCAGACCTGGCTTCAAATCCCAGCCTCCCTGATGAGCC
CUST_858_PI429285431	6.39e-09	0.38438	lncRNA		CUST_858_PI429285431	CUST_858_PI429285431	FALSE	lncRNA	"transcript_id ""ENST00000449766.1"" | genecode_v17"		gencode_v17	-				chr2	43259640	43260442	-	intergenic					TTTGGAATCTGTATTTTTAACAAGCTGCCCAGTGAAAACCATTTCCTCCTCGTCGTGGCG
CUST_24556_PI429285431	1.16e-06	2.8348	lncRNA		CUST_24560_PI429285431	CUST_24560_PI429285431	FALSE	lncRNA	lnc-LMAN1L-1:2		lncipedia2.1	-				chr15	75122471	75125470	+	exonic_sense	CPLX3	+	594855	complexin 3	TGTATATAATTCTGTCCTCAAACTCACCCATAACAGAGAGCAGTGTCTCCCAGTGTCCCT
CUST_47911_PI429285431	4.55e-05	4.64731	lncRNA		CUST_47911_PI429285431	CUST_47911_PI429285431	FALSE	lncRNA	"gi|410171988|ref|XR_171519.1| PREDICTED: Homo sapiens putative POM121-like protein 1-like (LOC101060558), misc_RNA"		ncbi	-													GCCGGCATCAGAAGAATGTTTCGTGTTCGAAATTGTTTGAGGGCAGCTGAAGCAGACTAA
CUST_37784_PI429285431	1.32e-06	2.48239	lncRNA		CUST_37784_PI429285431	CUST_37784_PI429285431	FALSE	lncRNA	n346296|NULL|lincRNA|Homosapiens|HumanlincRNA|ScriptureReconstructionLincRNAsByLuo[unpublished]|linc_luo_1846|NULL|-1.2991100|-0.3277946		NONCODERv3	-				chr5	90600137	90603136	-	intergenic					TTCTTGTGTGTTTTGTTTTGATTTTTTCCTTAGTGACTGGAGGCCAGTTTCAATCCACTG
CUST_33402_PI429285431	6.38e-11	0.487132	lncRNA		CUST_33426_PI429285431	CUST_33426_PI429285431	FALSE	lncRNA	n340154|BC047912|mRNAlikelncRNA|Homosapiens|HumanlncRNA|JounralRNA|2614|NULL|-0.9598860|-0.3840326		NONCODERv3	-				chr10	119026626	119027557	-	exonic_antisense	SLC18A2	+	6571	"solute carrier family 18 (vesicular monoamine), member 2"	AAGTGTTTAAGACACTGTCAAGCTTAAGATGATGCAGGGGAAAAGTTAAACTGTGAAATA
LNCA_21_P0002089	1.62e-06	0.404641	lncRNA	XLOC_002254	LNCA_21_P0004567	LNCA_21_P0004567	FALSE	lncRNA			Agilent_HUMAN_G3V2	-	XLOC_004924			chr5	90606842	90607514	-	intergenic					TGCAAACCAAGTATATCATTACTGAACCTGAATATCCTTACTTTTTCATAAGATACATGA
CUST_21444_PI429285431	2.82e-06	0.460461	lncRNA		CUST_21444_PI429285431	CUST_21444_PI429285431	FALSE	lncRNA	lnc-DYNC1LI1-1:1		lncipedia2.1	-				chr3	32778891	32779356	-	exonic_antisense	CNOT10	+	25904	"CCR4-NOT transcription complex, subunit 10"	TTCTGAAGGTACAAACTACTTTGTTCAGCATACCTCCTGTCCTGACTAAATAAAACAAAT
CUST_35423_PI429285431	3.46e-09	0.496506	lncRNA		CUST_35439_PI429285431	CUST_35439_PI429285431	FALSE	lncRNA	n342503|AF088021|mRNAlikelncRNA|Homosapiens|HumanlncRNA|JounralRNA|4997|NULL|-1.3415400|-0.3993909		NONCODERv3	-				chr3	51698596	51699174	+	intergenic					GGTTTTATCTTAAAAGAACACACCAGTCATTCTGGGTCTCCCCTTATTGCCATTGCCAGG
CUST_17596_PI429285431	2.16e-05	0.47478	lncRNA		CUST_17596_PI429285431	CUST_17596_PI429285431	FALSE	lncRNA	lnc-WNT1-3:1		lncipedia2.1	-				chr12	49457155	49457965	+	intergenic					AATTCTTACATCATTAGGAATGAGGGGCTTCCTTTCTTCTCCTGAAACCCCATCATCTTT
LNCA_21_P0011565	4.11e-08	0.402608	lncRNA	XLOC_l2_005936	LNCA_33_P3228751	LNCA_33_P3228751	FALSE	lncRNA	NR_027001	NR_027001	Agilent_HUMAN_G3V2	-	LOC388152	uncharacterized LOC388152		chr15	84869093	84869152	-	intergenic					ATTTCCTTCCTGGCCACGCCTGTCCAGCGGCCTCTTTGGCTGCATTCAGCCCCTACTTAC
CUST_52153_PI429285431	6.26e-08	0.460325	lncRNA		CUST_52153_PI429285431	CUST_52153_PI429285431	FALSE	lncRNA	hg19_lincRNAsTranscripts_TCONS_l2_00017633 range=chr22:22012460-22015212 5'pad=0 3'pad=0 strand=+ repeatMasking=none		UCSC	-				chr22	22012460	22012882	+	intergenic					AAGCCAAGACAGAAGAAACCAGAACCCAACCTCTTGTGGGACCGGTTGACCTCCCCATGC
CUST_44360_PI429285431	3.16e-08	2.11003	lncRNA		CUST_44360_PI429285431	CUST_44360_PI429285431	FALSE	lncRNA	"gi|237874232|ref|NR_027697.1| Homo sapiens uncharacterized FLJ39653 (FLJ39653), transcript variant 2, non-coding RNA"		ncbi	-				Chr4	16228286	16230781	+	intergenic					TAGCAAATTGCCTGGCATATGGAGGTGCTCAGCAAATACCTGTTAAATAAATGAATGAAT
CUST_50394_PI429285431	3.25e-12	0.376562	lncRNA		CUST_5039_PI429285431	CUST_5039_PI429285431	FALSE	lncRNA	"transcript_id ""ENST00000553318.1"" | genecode_v17"		gencode_v17	-				chr14	101913979	101914491	+	intergenic					TGTTCGGTCCTTCAGGCTCTCCTTTAAAAGATTCCATGGCACCAACGAGACTCCAATAAA
CUST_31338_PI429285431	4.14e-08	0.474142	lncRNA		CUST_31338_PI429285431	CUST_31338_PI429285431	FALSE	lncRNA	n337806|AF083121|mRNAlikelncRNA|Homosapiens|HumanlncRNA|JounralRNA|188|NULL|1.5741800|-0.4866839		NONCODERv3	-				chr1	28390942	28391231	-	intronic_sense	EYA3	-	2140	eyes absent homolog 3 (Drosophila) (EC:3.1.3.48)	GACAGGTTTTCCTTAAATGGCCTCTGTTGTTCTCCTTTCTCCCAAAATATTCATTATTAA
CUST_41851_PI429285431	2.2e-05	0.358963	lncRNA		CUST_41851_PI429285431	CUST_41851_PI429285431	FALSE	lncRNA	ENST00000581277 ncrna:miRNA chromosome:GRCh37:10:135185060:135185167:-1 gene:ENSG00000265395 gene_biotype:miRNA transcript_biotype:miRNA		ensembl.GRCh37.72	-				chr10	135185060	135185167	-	intronic_sense	ECHS1	-	1892	"enoyl Coenzyme A hydratase, short chain, 1, mitochondrial (EC:4.2.1.17)"	CTGCGTCTCCCATTTTCGGGCTGGCCTGCTGCTCCGGACCTGTGCCTGATCTTAATGCTG
LNCA_21_P0009133	0.000446325	0.459989	lncRNA	XLOC_012007	LNCA_21_P0012726	LNCA_21_P0012726	FALSE	lncRNA_mRNA	XR_112634	XR_112634	Agilent_HUMAN_G3V2	ENST00000512175	XLOC_l2_010679			chr4	57450680	57450739	+	exonic_sense	THEGL	+			CAGCAAGAGATTCTCTTCGAATCTCTGATCCTTCTCCCCGGATATTACAACTCTCAGTAG
CUST_47905_PI429285431	2.78e-06	2.78099	lncRNA		CUST_47905_PI429285431	CUST_47905_PI429285431	FALSE	lncRNA	"gi|410171903|ref|XR_171464.1| PREDICTED: Homo sapiens uncharacterized LOC729218 (LOC729218), misc_RNA"		ncbi	-													GGCAGCCTCTTGGCCTCTAATTTGTTTATCTTTTGTGTATAAATCCCAAAATATGGAATT
CUST_38654_PI429285431	6.48e-09	2.53985	lncRNA		CUST_3865_PI429285431	CUST_3865_PI429285431	FALSE	lncRNA	"transcript_id ""ENST00000533082.1"" | genecode_v17"		gencode_v17	-				chr11	15593569	15594033	-	intergenic					TGGACAGGATAATTGGAAGTCTGTTGTGGGATTTCTGAGAAAGCTTTTGATTTTCTGACA
CUST_39577_PI429285431	3.28e-07	0.451479	lncRNA		CUST_39577_PI429285431	CUST_39577_PI429285431	FALSE	lncRNA	n387550|NULL|lncRNA|Homosapiens||UCSCGeneNoncode|uc011hog.1||-1.0855100|-0.2145493		NONCODERv3	-				chr6	2403916	2405895	+	intergenic					AGAAGACCACTCTTGTATATTCTTACAACTATGGTTGTACCCAATCTCCCTTCCAGAGGA
CUST_18171_PI429285431	1.97e-08	2.28565	lncRNA		CUST_18171_PI429285431	CUST_18171_PI429285431	FALSE	lncRNA	lnc-TTC30B-2:1		lncipedia2.1	-				chr2	178110372	178113371	-	intronic_sense	NFE2L2	-	4780	nuclear factor (erythroid-derived 2)-like 2	GCAGAAAAATGGTTCTATAACTCAGGGAATGGTAAATTTGTGAACTAGGGTTTTAACTTG
CUST_19166_PI429285431	8.06e-05	0.340308	lncRNA		CUST_19166_PI429285431	CUST_19166_PI429285431	FALSE	lncRNA	lnc-RP11-389E17.1.1-1:1		lncipedia2.1	-				chr4	178596991	178599151	+	intergenic					GCCCTCGTTGCCCTATTGCACTTTTGATAATATTTGCCTGTGACAAGTAGTTATTTTTCA
CUST_48467_PI429285431	2.09e-06	2.78436	lncRNA		CUST_48467_PI429285431	CUST_48467_PI429285431	FALSE	lncRNA	hg19_lincRNAsTranscripts_TCONS_l2_00001802 range=chr1:224139118-224140327 5'pad=0 3'pad=0 strand=- repeatMasking=none		UCSC	-				chr1	224139118	224140234	-	intergenic					CGGCAGCCTCTTGGCTTCTAATTTGTTTATCTTTTGTGTATAAATCCCAAAATATGGAAT
LNCA_21_P0003178	2.43e-06	2.86861	lncRNA	XLOC_003262	LNCA_21_P0006082	LNCA_21_P0006082	FALSE	lncRNA			Agilent_HUMAN_G3V2	-	XLOC_007749			chr9	82489627	82489686	-	intergenic					CCTGTTCTCCAGTCACCTTTTCTCCATAAATGTTTGTGGTATAAAATGAAAACCTTCCCA
CUST_24546_PI429285431	4.07e-08	0.447737	lncRNA		CUST_24551_PI429285431	CUST_24551_PI429285431	FALSE	lncRNA	lnc-B4GALNT3-1:1		lncipedia2.1	-				chr12	700187	700575	+	intronic_antisense	NINJ2	-	4815	ninjurin 2	TTTCAAAATGGTATGACAGTCCCTAGGTTCTCTGGCTCCTGTTTCTGGATTCAGTGCTGT
CUST_25440_PI429285431	1.96e-06	0.498938	lncRNA		CUST_25440_PI429285431	CUST_25440_PI429285431	FALSE	lncRNA	lnc-LCN15-1:1		lncipedia2.1	-				chr9	139703179	139705564	-	intronic_antisense	RABL6	+			GAAGTGCATTCAGCCTGCCTGAAGACAGATTCATCCTCTTCCCCAAAACCTGGCCTCTTC
CUST_13225_PI429285431	1.53e-09	0.341747	lncRNA		CUST_13225_PI429285431	CUST_13225_PI429285431	FALSE	lncRNA	lnc-DIAPH3-3:2		lncipedia2.1	-				chr13	61192968	61193349	-	intergenic					AAGGAAGCATTAGCAGTGAGGAATAACTGTTCTCTCCCTAAACATACCACCCAAGGTAAT
LNCA_21_P0011668	1.15e-06	0.307668	lncRNA	XLOC_l2_006575	LNCA_33_P3236218	LNCA_33_P3236218	FALSE	lncRNA	XM_001715028	XM_001715028	Agilent_HUMAN_G3V2	-	LOC391767	putative TAF11-like protein ENSP00000332601-like		chr5	17635043	17635102	+	intergenic					GACATGTGTGAGATGTGGGGAGAAATGCCCCCATTGCAGCCCATGGATTTAAGGGAGGCT
CUST_9412_PI429285431	2.74e-07	0.462088	lncRNA		CUST_9412_PI429285431	CUST_9412_PI429285431	FALSE	lncRNA	lnc-PPDPF-1:1		lncipedia2.1	-				chr20	62136763	62137540	+	intergenic					ATGCAGCTAAAATTAACCGCTATCAAGCTGTCAGCCCTGGAAATAAACCTGCCTCCCATT
CUST_46378_PI429285431	6.66e-08	3.17634	lncRNA		CUST_46378_PI429285431	CUST_46378_PI429285431	FALSE	lncRNA	"gi|213512533|ref|NR_015415.1| Homo sapiens DICER1 antisense RNA 1 (DICER1-AS1), non-coding RNA"		ncbi	-				Chr14	95624025	95624854	+	intergenic					CTGTGCCAAGCAGGACTGTCTCTCTTAAGAGAAAAATAAAATTTATTGGTGTTTAAACCA
CUST_19714_PI429285431	4.31e-06	0.393794	lncRNA		CUST_19714_PI429285431	CUST_19714_PI429285431	FALSE	lncRNA	lnc-AC090186.1-1:3		lncipedia2.1	-				chr8	52858996	52859931	+	intergenic					TATCACATATGATCCAGCTGAAAGTCCCTACAAACTGGGCCCTCTGTGTCTTTAGAAGCA
CUST_28375_PI429285431	0.000211256	0.488104	lncRNA		CUST_28375_PI429285431	CUST_28375_PI429285431	FALSE	lncRNA	n325689|NULL|mRNAlikelncRNA|Homosapiens|vegalncRNA|GENCODE|OTTHUMT00000045342|http://vega.sanger.ac.uk/Homo_sapiens/Transcript/Summary?db=core;t=OTTHUMT00000045342|-1.1121500|-0.3371933		NONCODERv3	-				chr13	77134635	77135152	+	intergenic					TCAAACATACACCCCTCCCGTTTCTGATCCCTCCAGGATCTTAGTATCTGAATGAGTTGT
LNCA_19_P00318284	0.00131716	0.415179	lncRNA	FLJ30838	LNCA_19_P00319721	LNCA_19_P00319721	FALSE	lncRNA	NR_026835	NR_026835	Agilent_HUMAN_G3V2	-	FLJ37201			chr10	91451188	91451247	-	intergenic					GTTATTAGCCTGATGAATGTGAATTGATTCCTGTGGCCTTGTCTTCTTTGTTTTGTTTTT
CUST_48777_PI429285431	1.76e-06	0.469159	lncRNA		CUST_48777_PI429285431	CUST_48777_PI429285431	FALSE	lncRNA	hg19_lincRNAsTranscripts_TCONS_l2_00015068 range=chr2:200773626-200775881 5'pad=0 3'pad=0 strand=- repeatMasking=none		UCSC	-				chr2	200773626	200773921	-	intergenic					TTTTCTAACAACACTGGCACAGATGGCCAAGCATTCTCCCTTTTCTCAGAGCTGGTTTTC
CUST_18785_PI429285431	4.49e-08	0.349595	lncRNA		CUST_18785_PI429285431	CUST_18785_PI429285431	FALSE	lncRNA	lnc-RNF144A-2:5		lncipedia2.1	-				chr2	7562704	7563221	+	intergenic					GAGAACACCATCAGATGATCTTTCTGCCCAGAGCCACTATCTGTCCCTAAATATCAGGTT
CUST_32083_PI429285431	2.97e-11	4.43762	lncRNA		CUST_32083_PI429285431	CUST_32083_PI429285431	FALSE	lncRNA	n338647|AF052107|mRNAlikelncRNA|Homosapiens|HumanlncRNA|JounralRNA|1061|NULL|-1.2327500|-0.4137472		NONCODERv3	-				chr2	8992819	8994394	-	intergenic					CTGGTGGCTTATTGCTGGTTTTTAAAGGTGTTTTTAACTTACATGTAACATGTTTAGGAC
CUST_7658_PI429285431	1.11e-05	2.20188	lncRNA		CUST_7658_PI429285431	CUST_7658_PI429285431	FALSE	lncRNA	lnc-CHP2.1-1:1		lncipedia2.1	-				chr16	23889391	23892294	+	intronic_sense	PRKCB	+	5579	"protein kinase C, beta (EC:2.7.11.13)"	TATCCTAAGTGCCTTAGTGGTATCAGCTTATTTAAGACTGACAGTACTCTGAGGTGCAGT
CUST_26181_PI429285431	6.35e-08	0.399514	lncRNA		CUST_26181_PI429285431	CUST_26181_PI429285431	FALSE	lncRNA	lnc-ACOT12-1:5		lncipedia2.1	-				chr5	80597106	80597706	-	exonic_antisense	ZCCHC9	+	84240	"zinc finger, CCHC domain containing 9"	AGACAGAGCCAAAAGCAATAATATCCTGTTTGTTCCTACACTGCCCTCCGCATTAAAAAA
CUST_7472_PI429285431	7.53e-06	2.10301	lncRNA		CUST_7472_PI429285431	CUST_7472_PI429285431	FALSE	lncRNA	lnc-KLF14-1:2		lncipedia2.1	-				chr7	130597710	130598287	-	intergenic					GCTTCTGCTTATAAGTCAACCTCAAGGGAGTTTTATTTTGTCCCTGGATGATTCCTCAGT
CUST_20041_PI429285431	2.53e-05	0.494648	lncRNA		CUST_20041_PI429285431	CUST_20041_PI429285431	FALSE	lncRNA	lnc-SFTA2-10:1		lncipedia2.1	-				chr6	30842554	30845553	-	intergenic					AGTTTTAAAAAGTGATTTGTATGTCAAAAACAAACCCCAACCTTCTCTCCTTGCCACCCA
CUST_51196_PI429285431	0.000396284	0.397721	lncRNA		CUST_51196_PI429285431	CUST_51196_PI429285431	FALSE	lncRNA	hg19_lincRNAsTranscripts_TCONS_l2_00008933 range=chr15:23186906-23208186 5'pad=0 3'pad=0 strand=- repeatMasking=none		UCSC	-				chr15	23189906	23190482	-	intergenic					CCCTCCCTTGTTAATCACTTATGTACAAAAATGCATGTTTTGCTGTTGATCTGTTTTAAC
CUST_18600_PI429285431	1.16e-06	0.259356	lncRNA		CUST_18603_PI429285431	CUST_18603_PI429285431	FALSE	lncRNA	lnc-EIF2AK3-4:2		lncipedia2.1	-				chr2	89161398	89161650	-	intergenic					AAATCAAACGAAGCAGTTTTGCATCAGTAGCTGCATCTCCTCCATGATTCTAGCTGCCAC
CUST_48863_PI429285431	1e-09	0.495929	lncRNA		CUST_48863_PI429285431	CUST_48863_PI429285431	FALSE	lncRNA	hg19_lincRNAsTranscripts_TCONS_l2_00019174 range=chr3:12818116-12833839 5'pad=0 3'pad=0 strand=- repeatMasking=none		UCSC	-				chr3	12818116	12818383	-	intergenic					TTGAATTGGGTGATGATTACAGGAAGACACTGCAAGAAGGATCAGCCTCCCATCTTTCTG
CUST_5412_PI429285431	3.48e-07	0.48044	lncRNA		CUST_5412_PI429285431	CUST_5412_PI429285431	FALSE	lncRNA	"transcript_id ""ENST00000576762.1"" | genecode_v17"		gencode_v17	-				chr16	3231233	3231686	-	intergenic					AGTGTATCCGACTTATAATACAACTGTCCCTACTGTGTCTAAAGAAATGAAAGGCAATAA
LNCA_21_P0005869	9.22e-07	0.494281	lncRNA	XLOC_007149	LNCA_21_P0009507	LNCA_21_P0009507	FALSE	lncRNA			Agilent_HUMAN_G3V2	-	XLOC_012732			chr18	76400964	76401023	+	intergenic					AATAGACCACATCAGCTTCTCCCCAGGTGATAGTTCCCCCAAGCAGAATGCACATTGCCA
CUST_50282_PI429285431	9.07e-07	0.357527	lncRNA		CUST_50282_PI429285431	CUST_50282_PI429285431	FALSE	lncRNA	hg19_lincRNAsTranscripts_TCONS_l2_00029403 range=chr9:75477340-75478879 5'pad=0 3'pad=0 strand=- repeatMasking=none		UCSC	-				chr9	75477340	75478291	-	intergenic					GATGTGAATATTATCGAAGTGGTCTCCCTTGGGAAATCAAAAAACTGTTCTAAAATCTGA
CUST_22816_PI429285431	1.47e-05	0.434695	lncRNA		CUST_22816_PI429285431	CUST_22816_PI429285431	FALSE	lncRNA	lnc-SMYD3-2:1		lncipedia2.1	-				chr1	245839508	245839954	-	intronic_antisense	KIF26B	+	55083	kinesin family member 26B	CTTGCCGCTTCATCGTCTCTGAACCTCCTGTGTCTCCTTCGTGATAAACTTGCATTTTTA
CUST_48993_PI429285431	1.1e-05	0.409984	lncRNA		CUST_48993_PI429285431	CUST_48993_PI429285431	FALSE	lncRNA	hg19_lincRNAsTranscripts_TCONS_l2_00020324 range=chr3:197305084-197342531 5'pad=0 3'pad=0 strand=- repeatMasking=none		UCSC	-				chr3	197305084	197306039	-	intergenic					TCAATCTGGTGGTCTTTTGTTTCCAGCTCTCCCCAATATCCCTATTGTGCATTCCTCATG
CUST_37202_PI429285431	0.000156894	0.445222	lncRNA		CUST_37203_PI429285431	CUST_37203_PI429285431	FALSE	lncRNA	n345636|NULL|lincRNA|Homosapiens|HumanlincRNA|ScriptureReconstructionLincRNAsByLuo[unpublished]|linc_luo_1185|NULL|-1.5640300|-0.3791837		NONCODERv3	-				chr4	68297684	68300679	-	intergenic					GGGTGGATCCTGAGAAAGAAGTAGAATAGATCTTGGGGTCCTTCAAAATAATACAGAGGA
CUST_6496_PI429285431	5.63e-07	0.471507	lncRNA		CUST_6496_PI429285431	CUST_6496_PI429285431	FALSE	lncRNA	"transcript_id ""ENST00000591116.1"" | genecode_v17"		gencode_v17	-				chr19	37742824	37743638	+	intergenic					ACCTTTCTGAAGTTTTCTAGTCCCTCCTTTTTGTTTGTGGTCCTTAAAGCCCAGCCCCAT
CUST_30628_PI429285431	0.00406469	0.482436	lncRNA		CUST_30661_PI429285431	CUST_30661_PI429285431	FALSE	lncRNA	n336101|X87458|mRNAlikelncRNA|Homosapiens|NULL|H-invitationalv7.5|HIT000324301|http://h-invitational.jp/hinv/spsoup/transcript_view?hit_id=HIT000324301|1.6078700|-0.0586105		NONCODERv3	-				chr2	89185414	89185680	+	intergenic					GCTGAAGATGTGGCAGTTTATTACTGTCACCAGTATTATAGCCCTCCATTCACTTTCGGC
LNCA_33_P3385662	9.76e-09	0.451075	lncRNA	LOC441736
CUST_7759_PI429285431	4.45e-06	2.70143	lncRNA		CUST_7759_PI429285431	CUST_7759_PI429285431	FALSE	lncRNA	lnc-LONRF1-2:1		lncipedia2.1	-				chr8	12522787	12524359	-	intergenic					ATGTGTTTTTGCAGTGATGTTTTGTTCTGGAGTACGTCACAAGAGACAAGGTCCTTGGCT
CUST_47015_PI429285431	8.06e-06	0.40806	lncRNA		CUST_47015_PI429285431	CUST_47015_PI429285431	FALSE	lncRNA	"gi|338797715|ref|NR_040024.1| Homo sapiens uncharacterized LOC100131655 (LOC100131655), non-coding RNA"		ncbi	-				Chr18	74506688	74507996	-	intergenic					GCAGCCATCCTCCCCACCTAATGAAATAAAATGTAGATTTCTGTTGTTTAATTGCACCTA
CUST_29056_PI429285431	2.28e-06	0.463677	lncRNA		CUST_29056_PI429285431	CUST_29056_PI429285431	FALSE	lncRNA	n326545|NULL|mRNAlikelncRNA|Homosapiens|vegalncRNA|GENCODE|OTTHUMT00000027492|http://vega.sanger.ac.uk/Homo_sapiens/Transcript/Summary?db=core;t=OTTHUMT00000027492|2.8335300|-0.3011660		NONCODERv3	-				chr1	83817046	83817222	-	intergenic					TTAATTTTGCTACTCCTCCAGCTATCGTCCCAAGCCCTTTTGTTGTATGGCAGAGCTACT
CUST_13987_PI429285431	1.56e-05	0.409885	lncRNA		CUST_1398_PI429285431	CUST_1398_PI429285431	FALSE	lncRNA	"transcript_id ""ENST00000479244.1"" | genecode_v17"		gencode_v17	-				chr3	86313705	86314409	-	intergenic					ACTCACTTGTTATTGTGGCCATTACTTTGCTGCTGCTTAATAAAGGTCTTGTTCTTATTA
CUST_33191_PI429285431	1.53e-07	0.483363	lncRNA		CUST_33228_PI429285431	CUST_33228_PI429285431	FALSE	lncRNA_mRNA	n339927|D86975|mRNAlikelncRNA|Homosapiens|HumanlncRNA|JounralRNA|2376|NULL|7.1807700|-0.1371148		NONCODERv3	gi|291042666|ref|NM_014643.3|				chr18	74072229	74075228	-	exonic_sense	ZNF516	-	9658	zinc finger protein 516	ATTCAGCCCAATGGTTACAAAAGCATCAGAAGCAATTTGGTTTTCCTTTCCCGGAGCGGA
CUST_43162_PI429285431	1.23e-08	2.67885	lncRNA		CUST_43162_PI429285431	CUST_43162_PI429285431	FALSE	lncRNA	ENST00000597755 havana:sense_intronic chromosome:GRCh37:17:40422535:40423389:-1 gene:ENSG00000236194 gene_biotype:sense_intronic transcript_biotype:sense_intronic		ensembl.GRCh37.72	-				chr17	40422535	40423389	-	intronic_sense	STAT5B	-	6777	signal transducer and activator of transcription 5B	TTTGAGGCTTGTATTTCTTTGTGTTCCCAAATGGAGTCTCGTTGGTTTTTGAATAGAAAA
CUST_47952_PI429285431	1.21e-07	2.44817	lncRNA		CUST_47952_PI429285431	CUST_47952_PI429285431	FALSE	lncRNA	"gi|410172547|ref|XR_171850.1| PREDICTED: Homo sapiens supervillin pseudogene (LOC645954), misc_RNA"		ncbi	-													TCTATCTCACCGACGAAGACTTCGAGTTTGCACTAGACATGATGAGGGACGAATACAATG
CUST_40472_PI429285431	9.6e-07	0.46284	lncRNA		CUST_40472_PI429285431	CUST_40472_PI429285431	FALSE	lncRNA	n409404|NR_033800|lncRNA|Homosapiens||RefGeneNoncode|NR_033800||4.1633700|-0.1781407		NONCODERv3	-				chr21	40685860	40686887	-	intergenic					TAGTCTTCCAAGAGGATTCTAACTGCACATGACTCCCTAGTTTCCGGCTTCTCTTCCTAA
CUST_14084_PI429285431	9.65e-09	3.49163	lncRNA		CUST_14084_PI429285431	CUST_14084_PI429285431	FALSE	lncRNA	lnc-COBL-1:1		lncipedia2.1	-				chr7	51470225	51470540	-	intergenic					CTTGGACTGTAACTCAAAAATGATCAAATAATAGTGCATGCATCAAGTGCAATGGGAAGC
CUST_29114_PI429285431	1.01e-07	0.393388	lncRNA		CUST_29114_PI429285431	CUST_29114_PI429285431	FALSE	lncRNA	n326613|NULL|mRNAlikelncRNA|Homosapiens|vegalncRNA|GENCODE|OTTHUMT00000022441|http://vega.sanger.ac.uk/Homo_sapiens/Transcript/Summary?db=core;t=OTTHUMT00000022441|-0.8529050|-0.1639414		NONCODERv3	-				chr1	51433354	51435719	-	exonic_antisense	CDKN2C	+	1031	"cyclin-dependent kinase inhibitor 2C (p18, inhibits CDK4)"	TCTAGAATGGTCTCTCTCCTAATCCTTTATTTAATCATCCGACACCAATTTCCAGTACTT
CUST_13320_PI429285431	7.79e-06	0.41552	lncRNA		CUST_13320_PI429285431	CUST_13320_PI429285431	FALSE	lncRNA	lnc-HS1BP3-1:11		lncipedia2.1	-				chr2	20727553	20728011	-	intergenic					TTTAGCAGACAGACGGGTTGAGTCACCACAAGATGCTGTTATGGTTTAAATGTGTGGAGC
CUST_243_PI429285431	1.13e-07	0.379777	lncRNA		CUST_24330_PI429285431	CUST_24330_PI429285431	FALSE	lncRNA	lnc-KCNMB4-1:5		lncipedia2.1	-				chr12	70914566	70915116	+	exonic_antisense	PTPRB	-	5787	"protein tyrosine phosphatase, receptor type, B (EC:3.1.3.48)"	TCATTGGAATTTGTTATAGTCAAAAACCCTCAACCCTGCATCCTACCATCCTGGGCTTGC
CUST_21763_PI429285431	4.15e-07	2.02788	lncRNA		CUST_21763_PI429285431	CUST_21763_PI429285431	FALSE	lncRNA	lnc-CRLF3-1:1		lncipedia2.1	-				chr17	29109010	29109317	-	intergenic					CAGGAGTGCCTTAAACCTAATTTGAGACAGGAGTGGTAATATTTGGAACTCTGAAACTAA
CUST_10813_PI429285431	4.47e-05	0.395641	lncRNA		CUST_1081_PI429285431	CUST_1081_PI429285431	FALSE	lncRNA	"transcript_id ""ENST00000453636.1"" | genecode_v17"		gencode_v17	-				chr2	139362080	139362759	+	intergenic					GTGGAACTGTATTCTCTAATCAATATTAGCACATACATATTGCCCCAGACTGTACCTCCT
LNCA_21_P0011986	9.19e-07	0.478591	lncRNA	XLOC_l2_008405	LNCA_33_P3268863	LNCA_33_P3268863	FALSE	lncRNA_mRNA	XR_110537	XR_110537	Agilent_HUMAN_G3V2	ENST00000317019	C11orf44	chromosome 11 open reading frame 44	GO:0005576(extracellular region)	chr11	130584203	130584262	+	exonic_sense	C11orf44	+			TCCGTCTCTCCAGTGAAATGGTCCTGAAAATTAGGTATCATGTTTTGTTTAACTCTTTAT
LNCA_21_P0003732	3.64e-10	0.216452	lncRNA	XLOC_003911	LNCA_21_P0006788	LNCA_21_P0006788	FALSE	lncRNA	XR_110454	XR_110454	Agilent_HUMAN_G3V2	-	LOC100505869	uncharacterized LOC100505869		chr10	106111628	106112877	-	bidirectional	CCDC147	+	159686	coiled-coil domain containing 147	AGATATCTTTGAGAAGCCTGGACATCAATCTGCTTTAGAAGACTAGAAACTCTGCCTTTA
CUST_2001_PI429285431	9.45e-07	0.483216	lncRNA		CUST_2001_PI429285431	CUST_2001_PI429285431	FALSE	lncRNA	"transcript_id ""ENST00000605834.1"" | genecode_v17"		gencode_v17	-				chr4	185395956	185398458	+	bidirectional	IRF2	-	3660	interferon regulatory factor 2	ACTGCCCCCCTCAAAAGCCTCTCTGTAGCCTTCAGAATAAAGACCATATTATTTGACAAG
CUST_9682_PI429285431	4.79e-06	0.304068	lncRNA		CUST_9682_PI429285431	CUST_9682_PI429285431	FALSE	lncRNA	lnc-PRPS1-1:1		lncipedia2.1	-				chrX	106949529	106952026	+	intergenic					TTGCTGTCTTCTCCCCAGCTTACTTTGCCACCAAGTAATTCTGATTTTTCACCTAGTGGA
CUST_2806_PI429285431	1.89e-05	0.47383	lncRNA		CUST_2806_PI429285431	CUST_2806_PI429285431	FALSE	lncRNA	"transcript_id ""ENST00000446024.1"" | genecode_v17"		gencode_v17	-				chr7	36069221	36069702	+	intergenic					ACTTGGAATGAGAAAAAGTTACACCCATGACCTCCAGTCTGTCCCTTCAGGAGATAAAGC
CUST_27991_PI429285431	1.16e-06	0.491359	lncRNA		CUST_27991_PI429285431	CUST_27991_PI429285431	FALSE	lncRNA	n325244|NULL|mRNAlikelncRNA|Homosapiens|vegalncRNA|GENCODE|OTTHUMT00000328232|http://vega.sanger.ac.uk/Homo_sapiens/Transcript/Summary?db=core;t=OTTHUMT00000328232|-1.1860100|-0.2502938		NONCODERv3	-				chr2	77733046	77733329	-	intronic_sense	LRRTM4	-	80059	leucine rich repeat transmembrane neuronal 4	TGAAATGAGATTTTTGTATCGCTCTCTCTTCCCTGAACACACATATTTGGTATTTTGACT
CUST_42770_PI429285431	2.42e-07	2.30918	lncRNA		CUST_42770_PI429285431	CUST_42770_PI429285431	FALSE	lncRNA	ENST00000517097 ncrna:snoRNA chromosome:GRCh37:1:175937534:175937676:-1 gene:ENSG00000252906 gene_biotype:snoRNA transcript_biotype:snoRNA		ensembl.GRCh37.72	-				chr1	175937534	175937676	-	intronic_sense	RFWD2	-	64326	ring finger and WD repeat domain 2	TACATAAATATATGGAGGTCTCTGTCTGGCTTAGGACAGCTGGCTAAGTCTGATCGTTCC
CUST_9155_PI429285431	0.031504	2.83119	lncRNA		CUST_9155_PI429285431	CUST_9155_PI429285431	FALSE	lncRNA	lnc-LGALSL-2:4		lncipedia2.1	-				chr2	64478935	64479535	+	intergenic					AGCAAATAGGAAAAGGGAGTGAAGGACTGAGTTTTAACTCTTCTAATTTCGTAACCTGAC
CUST_38797_PI429285431	4e-08	2.42989	lncRNA		CUST_38797_PI429285431	CUST_38797_PI429285431	FALSE	lncRNA	n384498|NULL|lncRNA|Homosapiens||UCSCGeneNoncode|uc003icx.1||0.5882660|-0.1321228		NONCODERv3	-				chr4	120299286	120301106	+	intergenic					GCCAGAAAGTTGCCATGACCGTCATTAAACCTGTTTAACACCAAATAATAAGGAAAATAA
CUST_29946_PI429285431	2.84e-08	0.385077	lncRNA		CUST_29946_PI429285431	CUST_29946_PI429285431	FALSE	lncRNA	n334137|M73463|mRNAlikelncRNA|Homosapiens|NULL|H-invitationalv7.5|HIT000196262|http://h-invitational.jp/hinv/spsoup/transcript_view?hit_id=HIT000196262|1.0122400|-0.1312222		NONCODERv3	-					0	284							TGTATTTTTGTGCTAGTGGTTTCGGCTTGAATAATTCACCCCTCCACTTTGGGAACGGGA
CUST_37995_PI429285431	2.29e-07	0.360679	lncRNA		CUST_37995_PI429285431	CUST_37995_PI429285431	FALSE	lncRNA	n346551|NULL|lincRNA|Homosapiens|HumanlincRNA|ScriptureReconstructionLincRNAsByLuo[unpublished]|linc_luo_2101|NULL|-1.4929800|-0.2232839		NONCODERv3	-				chr2	89109724	89112615	-	intergenic					CTTAACTGATTCGAGTGCTTACAGTTTAGTATCAACCTTTTTCTCCTCCTGGGGTTTGCA
LNCA_19_P00321872	3.07e-06	0.458997	lncRNA	LOC100506305	LNCA_19_P00802587	LNCA_19_P00802587	FALSE	lncRNA			Agilent_HUMAN_G3V2	-	XLOC_l2_003666			chr13	30728278	30728484	+	intergenic					GAAAACCACCTGACCTCCAGATTCTCTCTCGTCCAGTGGAGATTCTCCTGCCCGAAGGCA
CUST_37263_PI429285431	6.87e-08	2.40682	lncRNA		CUST_37265_PI429285431	CUST_37265_PI429285431	FALSE	lncRNA	n345703|NULL|lincRNA|Homosapiens|HumanlincRNA|ScriptureReconstructionLincRNAsByLuo[unpublished]|linc_luo_1252|NULL|-1.3269600|-0.1740730		NONCODERv3	-				chr8	123790246	123790911	-	intergenic					TCCAGCCTAATCGATCTCCCACTTGACTCTAGTCTCACCTGACATTATGTAGAGGAAAAC
CUST_14822_PI429285431	2.57e-05	0.465328	lncRNA		CUST_14822_PI429285431	CUST_14822_PI429285431	FALSE	lncRNA	lnc-FOXA2-4:2		lncipedia2.1	-				chr20	22665754	22666187	-	intergenic					AACTATACCAGTCCTCTGTTCCTGGTCTCTGGAGCTTCAATTTGGGAAAGTGACCCATTA
CUST_36209_PI429285431	4.65e-08	0.397403	lncRNA		CUST_36209_PI429285431	CUST_36209_PI429285431	FALSE	lncRNA	n344754|NULL|lincRNA|Homosapiens|HumanlincRNA|ScriptureReconstructionLincRNAsByLuo[unpublished]|linc_luo_303|NULL|-1.5391900|-0.3514826		NONCODERv3	-				chrX	13284165	13286574	-	intergenic					CTAGTATTGTTAACCATTGCAAAGAAATACTGTTGCCCTCCATTAAAACCTGAACTGCCT
CUST_10923_PI429285431	9.39e-07	0.402483	lncRNA		CUST_10923_PI429285431	CUST_10923_PI429285431	FALSE	lncRNA	lnc-GBE1-5:3		lncipedia2.1	-				chr3	80818910	80819786	-	intergenic					GAAGGTGAAACTGGCATGTCTGTTTGTTCTTCTCTTCCTGGTGTCAAAGACTCTTAAAGC
CUST_29132_PI429285431	5.47e-07	0.454584	lncRNA		CUST_29132_PI429285431	CUST_29132_PI429285431	FALSE	lncRNA	n326636|NULL|mRNAlikelncRNA|Homosapiens|vegalncRNA|GENCODE|OTTHUMT00000012052|http://vega.sanger.ac.uk/Homo_sapiens/Transcript/Summary?db=core;t=OTTHUMT00000012052|-1.0750200|-0.1511864		NONCODERv3	-				chr1	37500926	37501521	-	intergenic					TAATAAACAACGTTGTTTTTCTTTTTAACCCCTTTAGCTTGCTCCCCCACGGATCCTACT
CUST_21718_PI429285431	2.07e-07	0.464335	lncRNA		CUST_2171_PI429285431	CUST_2171_PI429285431	FALSE	lncRNA	"transcript_id ""ENST00000511474.1"" | genecode_v17"		gencode_v17	-				chr5	61173936	61174389	+	intergenic					TTCTCCAAAAAGTTGTTCAGATCATCTTGGGTCATCTGGATTTTGGCCATTTCGTCACAG
CUST_38615_PI429285431	3.1e-06	0.442766	lncRNA		CUST_38615_PI429285431	CUST_38615_PI429285431	FALSE	lncRNA	n383750|NULL|lncRNA|Homosapiens||UCSCGeneNoncode|uc002ttk.1||0.4549280|-0.3159724		NONCODERv3	-				chr2	133062358	133065148	+	intergenic					TGTGGTCCTGTGCGTTCTCTTCCAGACCCTTAGCTTATATGTTTTCCCTATAAAACTTAG
CUST_23244_PI429285431	1.16e-08	2.28259	lncRNA		CUST_23244_PI429285431	CUST_23244_PI429285431	FALSE	lncRNA	lnc-RP11-298P3.4.1-1:1		lncipedia2.1	-				chr13	33070344	33073343	-	intronic_sense	N4BP2L2	-	10443	NEDD4 binding protein 2-like 2	TTGAATGGGTATGGTGATGTTGGCAAATGATTAAGCCTAAGAAAAACTGTTTGTGTACCA
CUST_34855_PI429285431	6.81e-06	2.26513	lncRNA		CUST_34855_PI429285431	CUST_34855_PI429285431	FALSE	lncRNA	n341761|CR749681|mRNAlikelncRNA|Homosapiens|HumanlncRNA|JounralRNA|4235|NULL|-0.7983750|-0.1821271		NONCODERv3	-				chr9	115923285	115924262	-	exonic_antisense	SLC31A2	+	1318	"solute carrier family 31 (copper transporters), member 2"	ACTTTTCTTAGCTGGAGTGTGGCTTTGAGATCAGGAAGAGAAGCCACCTGAAAAATCCAG
CUST_8471_PI429285431	7.76e-06	0.435583	lncRNA		CUST_8471_PI429285431	CUST_8471_PI429285431	FALSE	lncRNA	lnc-KIAA0564-2:1		lncipedia2.1	-				chr13	42883549	42885960	-	intronic_antisense	AKAP11	+	11215	A kinase (PRKA) anchor protein 11	AGTAGAAGGTGGTGTAGCAGGTGCAAACTCTTTGGCTAATTCTCCCTTGAGCTTTTTAGT
CUST_3845_PI429285431	0.00130094	3.29663	lncRNA		CUST_3845_PI429285431	CUST_3845_PI429285431	FALSE	lncRNA	"transcript_id ""ENST00000524824.1"" | genecode_v17"		gencode_v17	-				chr11	327310	327896	+	intergenic					TGGCCAGTTCCATTCTCAAACTGCTGTGAGTGCAAAGCTCATGCTGGATTTTGAAGATTT
LNCA_21_P0013528	3.5e-06	2.06179	lncRNA	XLOC_l2_014602	LNCA_33_P3402010	LNCA_33_P3402010	FALSE	lncRNA	XR_133048	XR_133048	Agilent_HUMAN_G3V2	-	C14orf56	chromosome 14 open reading frame 56		chr14	71683036	71683095	-	intergenic					ATGGTAATGTCACTCAGTGGCACAGGGCTTGTTCCTCCCTTTTGTTCTCTTTTCTTTTTT
LNCA_24_P323084	3.63e-09	4.09784	lncRNA	LINC00482
LNCA_21_P0010592	7.42e-06	2.02959	lncRNA	LOC100288069	LNCA_21_P0014714	LNCA_21_P0014714	FALSE	lncRNA	XR_112508	XR_112508	Agilent_HUMAN_G3V2	-	FOXP1-IT1			chr3	71619482	71619541	-	intronic_sense	FOXP1	-	27086	forkhead box P1	CCCTTGGATTGGGGAGAGTCTTACAATGAATAACTCAGAAAAAAGTTTTCAAAATAATCC
CUST_948_PI429285431	1.22e-10	2.80183	lncRNA		CUST_948_PI429285431	CUST_948_PI429285431	FALSE	lncRNA	"transcript_id ""ENST00000409054.1"" | genecode_v17"		gencode_v17	-				chr2	87754887	87755982	+	intergenic					TATAAATCTTCAATACATCCTGTCCCCCTAAAACGGCATCTGGATCTTTTGAGGGTTAAA
CUST_23625_PI429285431	9.26e-06	2.24395	lncRNA		CUST_23625_PI429285431	CUST_23625_PI429285431	FALSE	lncRNA	lnc-HERC3-1:1		lncipedia2.1	-				chr4	89648986	89651985	+	exonic_antisense	FAM13A	-	10144	"family with sequence similarity 13, member A"	AACCTGGGTGGTTTGCGTAATTCTACATGTATAAGATATCTGTGCATAATGTGACTTAGA
CUST_24898_PI429285431	7.48e-06	0.496424	lncRNA		CUST_24906_PI429285431	CUST_24906_PI429285431	FALSE	lncRNA_mRNA	lnc-CYB561D2-1:1		lncipedia2.1	"ENST00000360165,ENST00000231749"				chr3	50383002	50383251	+	exonic_antisense	ZMYND10	-	51364	"zinc finger, MYND-type containing 10"	TTTGCTGAAGCAACACACTTGGCCTACCCACTGGGTGGGGCAGGAAGTCTCCCATATCGA
CUST_3247_PI429285431	1.58e-10	0.409848	lncRNA		CUST_324_PI429201921	CUST_324_PI429201921	FALSE	lncRNA	TC0Y000290.hg.1		Affy_HUMAN_HTA2.0	-				chrY	6124307	6131994	-	intergenic					AGGCACAGAATTTTTTATAACTGTCTGCAGGTTCTCCTCATGTGGGGGAAAAACAGCATC
CUST_31745_PI429285431	7.03e-06	0.314978	lncRNA		CUST_31745_PI429285431	CUST_31745_PI429285431	FALSE	lncRNA	n338283|AK125037|mRNAlikelncRNA|Homosapiens|HumanlncRNA|JounralRNA|676|NULL|2.4824300|-0.1332547		NONCODERv3	-				chr19	7597615	7600614	-	exonic_antisense	PNPLA6	+	10908	patatin-like phospholipase domain containing 6 (EC:3.1.1.5)	GGACTGCTCCTCCCGCTAAAAATGAAAACGACACATTTATTTTCCCTTTTATTCAACACC
CUST_2903_PI429285431	2.82e-10	0.350242	lncRNA		CUST_29036_PI429285431	CUST_29036_PI429285431	FALSE	lncRNA	n326526|NULL|mRNAlikelncRNA|Homosapiens|vegalncRNA|GENCODE|OTTHUMT00000029386|http://vega.sanger.ac.uk/Homo_sapiens/Transcript/Summary?db=core;t=OTTHUMT00000029386|-1.1204900|-0.3132420		NONCODERv3	-				chr1	94556622	94557213	-	intronic_sense	ABCA4	-	24	"ATP-binding cassette, sub-family A (ABC1), member 4"	GGTATTAACCACACAAAAATACATCTCAAGCTATTGTTTCTCTGTTCCCTTTCCCCCAAA
CUST_10593_PI429285431	2.53e-06	0.482161	lncRNA		CUST_105_PI429285431	CUST_105_PI429285431	FALSE	lncRNA	"transcript_id ""ENST00000455464.2"" | genecode_v17"		gencode_v17	-				chr1	322078	322812	+	intergenic					CCATCACTGTGTAGTTAATTGTAGACTAGGTAATTTTAACTTTGTGATTTATTGCCGGAG
CUST_50610_PI429285431	1.21e-08	0.397392	lncRNA		CUST_50610_PI429285431	CUST_50610_PI429285431	FALSE	lncRNA	hg19_lincRNAsTranscripts_TCONS_l2_00002836 range=chr10:977936-988734 5'pad=0 3'pad=0 strand=+ repeatMasking=none		UCSC	-				chr10	977936	979906	+	bidirectional	LARP4B	-	23185	"La ribonucleoprotein domain family, member 4B"	TTCTGATAATTTTGTGATTCCATGAGATAAGAAAAGAACTTCCCTCTCCTGGAAATCTCA
LNCA_21_P0012140	2.16e-07	0.376292	lncRNA	FAM182B	LNCA_33_P3290235	LNCA_33_P3290235	FALSE	lncRNA_mRNA	NR_034152	NR_034152	Agilent_HUMAN_G3V2	"ENST00000375671,ENST00000375670"	LOC149950	uncharacterized LOC149950		chr20	31196447	31196506	+	intergenic					GCTCAGATGTCACCAGCTCTGTGCAGCCTCCCTGCCACCAAGTCTAAAATTGCCATAGTC
CUST_21793_PI429285431	1.35e-06	2.0285	lncRNA		CUST_21793_PI429285431	CUST_21793_PI429285431	FALSE	lncRNA	lnc-GGCT-1:24		lncipedia2.1	-				chr7	30601082	30602064	-	intergenic					AGTGAGTCATTTGAGTTTCTGTTATTCAGGTATACAGAGTTCCTGTTGTCTTTTTAGTCA
CUST_33799_PI429285431	1.2e-07	0.37983	lncRNA		CUST_33857_PI429285431	CUST_33857_PI429285431	FALSE	lncRNA	n340643|D86519|mRNAlikelncRNA|Homosapiens|HumanlncRNA|JounralRNA|3105|NULL|4.5734200|-0.2324759		NONCODERv3	-				chr5	137143461	137145417	+	intergenic					AAGTTATGACTAATGATATGCCTAGTAAAAACACTGCTATACCTCCTTAGCACTGAGAAT
CUST_50555_PI429285431	3.34e-07	0.401271	lncRNA		CUST_50555_PI429285431	CUST_50555_PI429285431	FALSE	lncRNA	hg19_lincRNAsTranscripts_TCONS_l2_00030927 range=chrY:9861073-9868148 5'pad=0 3'pad=0 strand=- repeatMasking=none		UCSC	-				chrY	9861073	9861392	-	intergenic					AAAGTTCCATCTTCAAGACGTGGAGGTCTTCCTCCTAAGAAATCTGTTCCTTCTGCTGTG
CUST_4861_PI429285431	0.00135413	0.435291	lncRNA		CUST_48610_PI429285431	CUST_48610_PI429285431	FALSE	lncRNA	hg19_lincRNAsTranscripts_TCONS_l2_00014600 range=chr2:62785198-62788934 5'pad=0 3'pad=0 strand=- repeatMasking=none		UCSC	-				chr2	62785198	62785425	-	intergenic					GGAAAGAGTTCTCAGTCAAATGAAAGTCTCTGCCTTGGGATTTATTAAACACTTTTATTC
CUST_36288_PI429285431	7.3e-07	0.447683	lncRNA		CUST_36288_PI429285431	CUST_36288_PI429285431	FALSE	lncRNA	n344815|NULL|lincRNA|Homosapiens|HumanlincRNA|ScriptureReconstructionLincRNAsByLuo[unpublished]|linc_luo_364|NULL|-1.3271400|-0.2294286		NONCODERv3	-				chr4	129349182	129351474	+	intergenic					GTGAAGTCCTTGTGAAGTCAGAGTGTTTCCTCTTCATGCCTCTACTCCTATGCAGTTTGA
CUST_19810_PI429285431	0.00150033	3.217	lncRNA		CUST_19810_PI429285431	CUST_19810_PI429285431	FALSE	lncRNA	lnc-CLEC4E-2:8		lncipedia2.1	-				chr12	8527013	8527636	-	intergenic					TGTGTTGGAAGGAAAATACCCGTACAGCCAACTTCCTTGAGGGTTCGTTCTTTTGCATCA
CUST_5892_PI429285431	1.29e-07	0.406502	lncRNA		CUST_5892_PI429285431	CUST_5892_PI429285431	FALSE	lncRNA	"transcript_id ""ENST00000573301.1"" | genecode_v17"		gencode_v17	-				chr17	48986998	48987489	-	intergenic					CTTCATTTCCAGTCTCTCCATAAAGCCTGATGTTCCTCCTTTTGTGTTCCTCTGGGTTAT
CUST_45630_PI429285431	5.06e-06	0.40986	lncRNA		CUST_456_PI429285431	CUST_456_PI429285431	FALSE	lncRNA	"transcript_id ""ENST00000413826.1"" | genecode_v17"		gencode_v17	-				chr1	153653277	153653749	+	exonic_sense	NPR1	+	4881	natriuretic peptide receptor A/guanylate cyclase A (atrionatriuretic peptide receptor A) (EC:4.6.1.2)	GATATAGGGGTGTTATTTTCTCCCATCCTCTTCCAAAATCCCAGTGCCTCTTGTTCCCTT
CUST_51826_PI429285431	0.000280742	0.421532	lncRNA		CUST_51826_PI429285431	CUST_51826_PI429285431	FALSE	lncRNA	hg19_lincRNAsTranscripts_TCONS_l2_00013068 range=chr19:36802821-36807311 5'pad=0 3'pad=0 strand=- repeatMasking=none		UCSC	-				chr19	36802821	36804570	-	intergenic					ACCCTCCAGAAGTTTCCTTCAAGCCGTACCTGTAAGAGTAAAAATAGAGAAAAATAAAAA
CUST_22270_PI429285431	2.67e-09	2.41892	lncRNA		CUST_22270_PI429285431	CUST_22270_PI429285431	FALSE	lncRNA	lnc-TGIF1-2:6		lncipedia2.1	-				chr18	3597174	3597353	+	intronic_antisense	DLGAP1	-	9229	"discs, large (Drosophila) homolog-associated protein 1"	GCTCACGATGGATATCTGAGAGCCAGCGAACTTTCTTTACCTCCTAGTATCATTTCATGA
CUST_41381_PI429285431	2.62e-07	0.457416	lncRNA		CUST_41381_PI429285431	CUST_41381_PI429285431	FALSE	lncRNA	ENST00000580204 ncrna:miRNA chromosome:GRCh37:2:213790981:213791060:1 gene:ENSG00000266354 gene_biotype:miRNA transcript_biotype:miRNA		ensembl.GRCh37.72	-				chr2	213790981	213791060	+	intergenic					TGGCAAGGGCTCTCCTGAAAGGACAGTAGAGCCCTTGCCATCCTGGTCCACTGCATATAG
LNCA_21_P0014594	0.000635471	0.423342	lncRNA	LOC100505820
CUST_36064_PI429285431	1.34e-06	0.445923	lncRNA		CUST_36064_PI429285431	CUST_36064_PI429285431	FALSE	lncRNA	n344656|NULL|lincRNA|Homosapiens|HumanlincRNA|ScriptureReconstructionLincRNAsByLuo[unpublished]|linc_luo_204|NULL|-1.5598300|-0.2418167		NONCODERv3	-				chr22	27067942	27068492	-	intergenic					TGTCCTGAGACTGGGCTAAGGTGACCCCTTAAGCCTTTGGGTAAGACTGGTTCCCTTTGG
CUST_49146_PI429285431	9.09e-07	2.7977	lncRNA		CUST_49147_PI429285431	CUST_49147_PI429285431	FALSE	lncRNA	hg19_lincRNAsTranscripts_TCONS_l2_00021266 range=chr4:120355717-120366886 5'pad=0 3'pad=0 strand=- repeatMasking=none		UCSC	-				chr4	120355717	120357171	-	intergenic					ATGCCACAATCCTGACCATATCTTCAAGTGAACAGAAGAATTCTATTAAAAAGTCAACCT
LNCA_21_P0001360	0.00105079	0.456381	lncRNA	XLOC_000329	LNCA_21_P0003488	LNCA_21_P0003488	FALSE	lncRNA			Agilent_HUMAN_G3V2	-	XLOC_004032			chr4	106058715	106058774	-	intergenic					AGATGGAAATAATGTCATAGAACGTCTCTCACAACTGTGTTATAAGAATGACAGGGAAGC
CUST_28319_PI429285431	5.66e-07	0.323955	lncRNA		CUST_28319_PI429285431	CUST_28319_PI429285431	FALSE	lncRNA	n325624|NULL|mRNAlikelncRNA|Homosapiens|vegalncRNA|GENCODE|OTTHUMT00000045824|http://vega.sanger.ac.uk/Homo_sapiens/Transcript/Summary?db=core;t=OTTHUMT00000045824|-0.5270320|-0.4788902		NONCODERv3	-				chr13	112024881	112025537	-	intergenic					TGAGGAGACAATAGAACTGTAGTTAAACAGGAGGCTCTCTTTGTTCCTGGAGACACAGGT
CUST_17205_PI429285431	0.00090903	0.425933	lncRNA		CUST_17205_PI429285431	CUST_17205_PI429285431	FALSE	lncRNA	lnc-CTDSP2-4:1		lncipedia2.1	-				chr12	58491565	58492064	-	intergenic					ACAAGTTCCACCCACTGCCTGAGAGTCCTGCCCTGAATTTTAGACTTTGATCATAAAAAA
CUST_51799_PI429285431	0.000517461	0.483188	lncRNA		CUST_51799_PI429285431	CUST_51799_PI429285431	FALSE	lncRNA	hg19_lincRNAsTranscripts_TCONS_l2_00012912 range=chr19:19869252-19873507 5'pad=0 3'pad=0 strand=- repeatMasking=none		UCSC	-				chr19	19869252	19869612	-	intergenic					TATGCTTCTTAGAGACAAGGCCTCACTCCATTGCCCCTAGGCCAGGCCTGGTGAGTGACA
CUST_45930_PI429285431	4.05e-09	6.6756	lncRNA		CUST_45930_PI429285431	CUST_45930_PI429285431	FALSE	lncRNA	"gi|299782550|ref|NR_033839.1| Homo sapiens uncharacterized LOC399972 (FLJ39051), non-coding RNA"		ncbi	-				Chr11	126211611	126212363	-	intergenic					GTGGCCAAGAAATGTATTCTCTCACTTTGGACTTAGGAGTCCAAAGAGAAGCCCAGAAAC
LNCA_21_P0006818	5.4e-06	0.495528	lncRNA	XLOC_008358	LNCA_21_P0010423	LNCA_21_P0010423	FALSE	lncRNA			Agilent_HUMAN_G3V2	-	XLOC_014272			chr22	47604345	47604404	+	intergenic					TCAGAGCAAAAGGCAACATGCTCTCCCGAGGTAAGATCCTAACTGTTGTCAGGAACATAT
CUST_22873_PI429285431	2.7e-06	2.5062	lncRNA		CUST_22873_PI429285431	CUST_22873_PI429285431	FALSE	lncRNA	lnc-PLEKHA8-1:1		lncipedia2.1	-				chr7	30180929	30181365	+	intronic_sense	C7orf41	+	222166	chromosome 7 open reading frame 41	TACAAATGAATACACGAGGCTCCGGTTAAACATTGCGCACAGAGTGTAGTTGAAAGGGTG
CUST_20783_PI429285431	0.000318968	0.493267	lncRNA		CUST_20783_PI429285431	CUST_20783_PI429285431	FALSE	lncRNA	lnc-HPS4-1:1		lncipedia2.1	-				chr22	26649940	26650474	-	intronic_antisense	SEZ6L	+	23544	seizure related 6 homolog (mouse)-like	ACCTTTCTCTCTCCTTGGGAAGCCCTTTGAATGTAGAAACTCTGCATTCCTCATTCCTGT
CUST_11808_PI429285431	4.66e-10	0.351448	lncRNA		CUST_11875_PI429285431	CUST_11875_PI429285431	FALSE	lncRNA	lnc-ALG10-1:1		lncipedia2.1	-				chr12	34209496	34210384	+	intergenic					AGATTATGAGGTTTTGCAATGTTGCCCTCCTAGTCCTGTGTACATTGCTGTAAAGACTCC
CUST_12902_PI429285431	0.000899708	0.483442	lncRNA		CUST_12903_PI429285431	CUST_12903_PI429285431	FALSE	lncRNA	lnc-ARHGAP20-1:1		lncipedia2.1	-				chr11	110794355	110794849	-	intergenic					CCTGGACATTTCTTGCCAAGGCTTCTTCCTATACATATACACAAAAATATGTTTTATGGA
CUST_31751_PI429285431	4.32e-08	0.440573	lncRNA		CUST_31751_PI429285431	CUST_31751_PI429285431	FALSE	lncRNA	n338288|BC010117|mRNAlikelncRNA|Homosapiens|HumanlncRNA|JounralRNA|681|NULL|-0.6074120|-0.2311403		NONCODERv3	-				chr1	156611457	156614456	-	exonic_antisense	BCAN	+	63827	brevican	AATAGTTACTGATGTCTACCTGAGCCAGTTCTCCTAAATGCTTCCTGTGGATAACCTCAA
CUST_7009_PI429285431	6.59e-06	0.477529	lncRNA		CUST_7009_PI429285431	CUST_7009_PI429285431	FALSE	lncRNA	"transcript_id ""ENST00000434938.2"" | genecode_v17"		gencode_v17	-				chrX	1515320	1515675	+	intergenic					TCCAAGGACCAAGAAGAAAGGAATGAGCCCCGATCCGCCTGCCAGGTTTCTTCCGAGATG
CUST_5861_PI429285431	3.66e-07	0.493788	lncRNA		CUST_5861_PI429285431	CUST_5861_PI429285431	FALSE	lncRNA	"transcript_id ""ENST00000586231.1"" | genecode_v17"		gencode_v17	-				chr17	41463231	41466120	-	intergenic					TTGCAACCATGATGACAAATCTCTCCCAGCTTTTTTGGGTCTCATCCCTGTATCTATAAA
CUST_24367_PI429285431	4.31e-06	0.438188	lncRNA		CUST_243_PI429285431	CUST_243_PI429285431	FALSE	lncRNA	"transcript_id ""ENST00000544621.1"" | genecode_v17"		gencode_v17	-				chr1	59250823	59251816	+	intergenic					TTCTATGAGGAATCTCAAATCCACATGGCTTCCCTGGATGACAACGCTGACTTTGACTAG
LNCA_21_P0007310	4.96e-07	0.446245	lncRNA	MRPL23-AS1	LNCA_21_P0010857	LNCA_21_P0010857	FALSE	lncRNA			Agilent_HUMAN_G3V2	-	XLOC_l2_001853			chr10	6335137	6335196	-	intergenic					AATTGCAGACATACTGTCAACATCTGGGACTCGAGTTACTATTACAATCATGTCTTCTTT
CUST_371_PI429285431	4.38e-08	3.04499	lncRNA		CUST_37123_PI429285431	CUST_37123_PI429285431	FALSE	lncRNA	n345564|NULL|lincRNA|Homosapiens|HumanlincRNA|ScriptureReconstructionLincRNAsByLuo[unpublished]|linc_luo_1113|NULL|-1.3933700|-0.3980556		NONCODERv3	-				chr2	203194361	203195103	-	intergenic					TGTCTGTAAATACTCCCTTTTCCAGGAAATGAACTTAATTCCCTCCCAATTCCCTTTCTA
CUST_44512_PI429285431	0.00113306	2.89962	lncRNA		CUST_44512_PI429285431	CUST_44512_PI429285431	FALSE	lncRNA	"gi|397139086|ref|XR_158785.1| PREDICTED: Homo sapiens integral membrane glycoprotein-like (LOC646652), misc_RNA"		ncbi	-													AAACACAGTGAGTGAGGACGGACCTCAGGCTGTCTCTTCGCGTGACACCCGCTGTGAAAA
CUST_28812_PI429285431	2e-08	0.373198	lncRNA		CUST_28812_PI429285431	CUST_28812_PI429285431	FALSE	lncRNA	n326224|NULL|mRNAlikelncRNA|Homosapiens|vegalncRNA|GENCODE|OTTHUMT00000091109|http://vega.sanger.ac.uk/Homo_sapiens/Transcript/Summary?db=core;t=OTTHUMT00000091109|-0.1580070|-0.2903005		NONCODERv3	-				chr1	220120945	220121664	-	intergenic					TTTTTAATGAGAGGCAATAATATCTGGAGATTCCCTGTCCTTAGAATGTTTTCCATAGTC
LNCA_21_P0014751	6.91e-07	0.443353	lncRNA	LOC100652785
CUST_37153_PI429285431	1.75e-08	3.56204	lncRNA		CUST_37162_PI429285431	CUST_37162_PI429285431	FALSE	lncRNA	n345598|NULL|lincRNA|Homosapiens|HumanlincRNA|ScriptureReconstructionLincRNAsByLuo[unpublished]|linc_luo_1147|NULL|-1.2837500|-0.1880172		NONCODERv3	-				chr3	137764167	137765901	+	intergenic					TGCAAGTGATATAAGCATCAGAGACACCTCCTTCCCAAAGAACTTAACACATGTTAGTGT
CUST_44420_PI429285431	2.4e-07	3.09891	lncRNA		CUST_44420_PI429285431	CUST_44420_PI429285431	FALSE	lncRNA	"gi|410170483|ref|XR_171076.1| PREDICTED: Homo sapiens uncharacterized LOC101059947 (LOC101059947), misc_RNA"		ncbi	-													CTTCCCAGGCCCCTGTTAAACAGGTTTAATGACGGTCATGGCAACTTTTTGGCACAGTGA
CUST_10040_PI429285431	2.74e-09	0.492856	lncRNA		CUST_10056_PI429285431	CUST_10056_PI429285431	FALSE	lncRNA_mRNA	lnc-METTL14-2:1		lncipedia2.1	ENST00000423687				chr4	119539321	119539559	+	intergenic					TCAATGTAATGGCTCCATCTCAGGAACAGCCAATGAAAGAGATGCACAGGACAAGAGATG
CUST_16812_PI429285431	2.07e-06	0.412208	lncRNA		CUST_16838_PI429285431	CUST_16838_PI429285431	FALSE	lncRNA_mRNA	lnc-C5orf47-2:1		lncipedia2.1	ENST00000521585				chr5	173669685	173670683	+	intergenic					ATGATTTGCCCGTCCACGTCCCAACTTCCTTCTTCCTTTAGACCTTTTTGTGTGACATGT
CUST_39333_PI429285431	1.31e-06	0.407798	lncRNA		CUST_39347_PI429285431	CUST_39347_PI429285431	FALSE	lncRNA	n386434|NULL|lncRNA|Homosapiens||UCSCGeneNoncode|uc010kzd.1||-1.1533900|-0.2719125		NONCODERv3	-				chr7	54268916	54270113	-	intergenic					GGTTTCCCTCAATATCATATTAGTCCTAGAACATACCTAACAGTAAGTCCCTTAGTTAAT
CUST_52220_PI429285431	4.94e-08	2.41119	lncRNA		CUST_52220_PI429285431	CUST_52220_PI429285431	FALSE	lncRNA	hg19_lincRNAsTranscripts_TCONS_00030021 range=chrUn_gl000211:21807-48108 5'pad=0 3'pad=0 strand=- repeatMasking=none		UCSC	-				chrUn_gl000211	21807	24009	-	intergenic					TATTCTCTCAAATTCCTTGAGGCATAGCAACTTGAGCTTACCAGTTTAGAAACTGGAGAT
LNCA_32_P11230	4.69e-07	2.93651	lncRNA	LOC399744
LNCA_23_P166508	0.000798341	0.402522	lncRNA
CUST_28313_PI429285431	7.51e-06	0.410517	lncRNA		CUST_28313_PI429285431	CUST_28313_PI429285431	FALSE	lncRNA	n325618|NULL|mRNAlikelncRNA|Homosapiens|vegalncRNA|GENCODE|OTTHUMT00000045980|http://vega.sanger.ac.uk/Homo_sapiens/Transcript/Summary?db=core;t=OTTHUMT00000045980|-1.2946800|-0.1959796		NONCODERv3	-				chr13	114113135	114113648	-	exonic_sense	DCUN1D2	-	55208	"DCN1, defective in cullin neddylation 1, domain containing 2 (S. cerevisiae)"	TCTTGCATAAATATATCTCCACATACTTGTCTCCCCCCGTGTTTAGGACTCTGCGTTGGA
CUST_6169_PI429285431	0.000125008	0.295926	lncRNA		CUST_6169_PI429285431	CUST_6169_PI429285431	FALSE	lncRNA	"transcript_id ""ENST00000591199.1"" | genecode_v17"		gencode_v17	-				chr18	39766635	39767670	+	intergenic					GTTCCTGGCTCTGTTTACTTAAGATTGTGCATCAGACTTAAGTATGAATAATATGTGAGA
CUST_26380_PI429285431	1.94e-08	0.316877	lncRNA		CUST_26385_PI429285431	CUST_26385_PI429285431	FALSE	lncRNA	lnc-C2orf42-3:1		lncipedia2.1	-				chr2	70315562	70316103	-	exonic_antisense	PCBP1	+	5093	poly(rC) binding protein 1	CAGAGGTGCTTAACCCTTATCCATCAGCATTCTCAGACAGCACCTCCGGTTAGGGACAGT
CUST_9251_PI429285431	7.75e-06	0.322675	lncRNA		CUST_9251_PI429285431	CUST_9251_PI429285431	FALSE	lncRNA	lnc-USP35-1:7		lncipedia2.1	-				chr11	77852641	77853226	+	intergenic					AAATGGGCAGCTGAAGATGATGATGATGATGATCTTGACACCGAGAAGCAGAAGACCAAT
CUST_29227_PI429285431	4.15e-06	3.17967	lncRNA		CUST_29228_PI429285431	CUST_29228_PI429285431	FALSE	lncRNA	n326752|NULL|mRNAlikelncRNA|Homosapiens|vegalncRNA|GENCODE|OTTHUMT00000006890|http://vega.sanger.ac.uk/Homo_sapiens/Transcript/Summary?db=core;t=OTTHUMT00000006890|-0.1963390|-0.2815025		NONCODERv3	-				chr1	670055	671914	-	intergenic					GACTGTGTATGTTTTTACAATTACGCTGTAGGATACATACTGTTGCATAGCCTTGAAAAT
LNCA_21_P0007412	0.000514538	0.304224	lncRNA	XLOC_009582	LNCA_21_P0010927	LNCA_21_P0010927	FALSE	lncRNA			Agilent_HUMAN_G3V2	-	XLOC_l2_001683			chr10	92821857	92821916	+	intergenic					TTACCAGCTGCCTCCACTCCCTTAACCTGCTACAGAATTAATAAACTAATCTTGAGCATA
LNCA_21_P0000318	0.000407061	2.48969	lncRNA	SNORA24	LNCA_21_P0002117	LNCA_21_P0002117	FALSE	lncRNA			Agilent_HUMAN_G3V2	-	XLOC_002358			chr2	154028542	154028601	-	intergenic					TGGTTCACTTCTCATCTCTGCCTCTTTCTTCCCAAATGTCCTGCACTAGAATGGTATGCT
LNCA_19_P00316014	0.000933451	0.357001	lncRNA	MIAT	LNCA_19_P00316467	LNCA_19_P00316467	FALSE	lncRNA	XR_108458	XR_108458	Agilent_HUMAN_G3V2	-	XLOC_002736	0		chr3	98700099	98700158	+	intergenic					TATTCCCCAGCTGTGTTACTCCTTCGCATTGTTATCTCTTTCCCTGGAATTGAAGGCTTC
CUST_48436_PI429285431	0.00099047	0.34023	lncRNA		CUST_48436_PI429285431	CUST_48436_PI429285431	FALSE	lncRNA	hg19_lincRNAsTranscripts_TCONS_l2_00002224 range=chr1:157895764-157918861 5'pad=0 3'pad=0 strand=+ repeatMasking=none		UCSC	-				chr1	157895764	157896804	+	intergenic					TGTTCCTCCCCACTCTAAGATCCATGTTCAAAGTTCCCATATAAATTGTGTCATCTCATT
CUST_19538_PI429285431	1.58e-06	2.18022	lncRNA		CUST_19538_PI429285431	CUST_19538_PI429285431	FALSE	lncRNA	lnc-DLX2-4:1		lncipedia2.1	-				chr2	173420817	173422213	-	exonic_antisense	PDK1	+	5163	"pyruvate dehydrogenase kinase, isozyme 1 (EC:2.7.11.2)"	AGCCAGGAGGTCATTTATGTTGCCTGGATTTGCTATTGTGCTTCTAATTAAGCTATTTCA
CUST_48118_PI429285431	6.95e-08	2.56102	lncRNA		CUST_48118_PI429285431	CUST_48118_PI429285431	FALSE	lncRNA	"gi|410169817|ref|XR_111043.4| PREDICTED: Homo sapiens supervillin pseudogene (LOC645954), misc_RNA"		ncbi	-													TCTATCTCACCGACGAAGACTTCGAGTTTGCACTAGACATGATGAGGGACGAATACAATG
CUST_44991_PI429285431	2.78e-05	0.417559	lncRNA		CUST_44991_PI429285431	CUST_44991_PI429285431	FALSE	lncRNA	"gi|190194394|ref|NR_023383.1| Homo sapiens DTX2P1-UPK3BP1-PMS2P11 readthrough (non-protein coding) (DTX2P1-UPK3BP1-PMS2P11), non-coding RNA"		ncbi	-				Chr7	76610139	76611920	+	intergenic					CACAAATGGTTCCTCTCCTCCTTCCTGATGTCTGCCATTAGCATTGGAATAAAGTTCCTG
CUST_28852_PI429285431	1.86e-08	3.00628	lncRNA		CUST_28852_PI429285431	CUST_28852_PI429285431	FALSE	lncRNA	n326267|NULL|mRNAlikelncRNA|Homosapiens|vegalncRNA|GENCODE|OTTHUMT00000090406|http://vega.sanger.ac.uk/Homo_sapiens/Transcript/Summary?db=core;t=OTTHUMT00000090406|1.0658500|-0.2550378		NONCODERv3	-				chr1	203691679	203694563	+	exonic_sense	ATP2B4	+	493	"ATPase, Ca++ transporting, plasma membrane 4 (EC:3.6.3.8)"	TTAGATTTGTTTTGTCTCTTTAGCCAAAGTGTTCTGATGTGAGGAATGGGGGTGGAACTT
LNCA_21_P0014442	2.98e-08	3.56024	lncRNA	LOC100507306
CUST_17117_PI429285431	4.87e-09	0.387803	lncRNA		CUST_1711_PI429285431	CUST_1711_PI429285431	FALSE	lncRNA	"transcript_id ""ENST00000505347.1"" | genecode_v17"		gencode_v17	-				chr4	19173958	19174598	-	intergenic					TTGTTACATCTTAACTGCCGTCTTCTGTCTCCCTACAAAATCGTAGTCATCTCCTACTTA
CUST_17680_PI429285431	8.67e-08	0.412943	lncRNA		CUST_17680_PI429285431	CUST_17680_PI429285431	FALSE	lncRNA	lnc-AC027763.2.1-1:1		lncipedia2.1	-				chr17	6923118	6923329	-	intergenic					TGGTCCAATCTTACTACACTGTGAGCTCATCCCCATGGTCCGTCGCCTTCCAGTTGCCTG
CUST_13794_PI429285431	4.16e-09	0.295375	lncRNA		CUST_13794_PI429285431	CUST_13794_PI429285431	FALSE	lncRNA	lnc-FER-1:1		lncipedia2.1	-				chr5	108063807	108066250	+	intergenic					TTCTTACAAAACCACGGCAAGGATTCAACCCCACAACTGCTGTCTAGAAAACCGAGGAAA
CUST_16113_PI429285431	1.27e-07	0.398761	lncRNA		CUST_16113_PI429285431	CUST_16113_PI429285431	FALSE	lncRNA	lnc-C6orf118-1:2		lncipedia2.1	-				chr6	165235427	165236489	-	intergenic					GACTTGCAACGTTCTTCTCAGCCTTCCTTCGCACCACTAAATTATCTCATTAAGTCAGGA
CUST_27382_PI429285431	5.13e-06	0.461691	lncRNA		CUST_27382_PI429285431	CUST_27382_PI429285431	FALSE	lncRNA	n324544|NULL|mRNAlikelncRNA|Homosapiens|vegalncRNA|GENCODE|OTTHUMT00000257856|http://vega.sanger.ac.uk/Homo_sapiens/Transcript/Summary?db=core;t=OTTHUMT00000257856|-0.0620427|-0.1175910		NONCODERv3	-				chr6	31105667	31106278	+	exonic_sense	PSORS1C1	+	170679	psoriasis susceptibility 1 candidate 1	TTTATCCCTCCCCCTCACACAAAGCCTGTCCTCCACCAGCAAAAGAGGTCTTAAAATATA
LNCA_21_P0012379	4.4e-05	0.40654	lncRNA	DUX4L9	LNCA_33_P3304247	LNCA_33_P3304247	FALSE	lncRNA	XR_108367	XR_108367	Agilent_HUMAN_G3V2	-				chr1	19679237	19679296	-	intronic_sense	CAPZB	-	832	"capping protein (actin filament) muscle Z-line, beta"	TCTCCCACCTCCAACCACCAAAAGATGTTTCTCAGGGACGTCAACTGGAAGACAAGGTAA
CUST_8606_PI429285431	0.000570883	2.05368	lncRNA		CUST_8606_PI429285431	CUST_8606_PI429285431	FALSE	lncRNA	lnc-DHRS12-1:1		lncipedia2.1	-				chr13	52422152	52423277	-	intergenic					CTTTGTGTAACTGAATCTTGTGCTTCATTTCCTTCTGGGCATTTTTCATTGTTGATGAAA
CUST_20668_PI429285431	2.81e-05	0.490227	lncRNA		CUST_20668_PI429285431	CUST_20668_PI429285431	FALSE	lncRNA	lnc-STX8-3:1		lncipedia2.1	-				chr17	9082246	9085245	-	exonic_antisense	NTN1	+	9423	netrin 1	TCTAAAGTCCCACTGAAGTGACTTACAACTTAACAGGCTAAGGTTTTTGCCTCCCTGCTG
CUST_20500_PI429285431	4.37e-07	5.63095	lncRNA		CUST_20500_PI429285431	CUST_20500_PI429285431	FALSE	lncRNA	lnc-CLEC4E-2:6		lncipedia2.1	-				chr12	8542883	8543329	-	intergenic					CTGGAAAGTGGTGGTAGTTCCAGATTTATGTGGATGTTACTTTGTTTTTCCCTATAAAAT
CUST_47889_PI429285431	3.57e-07	2.32464	lncRNA		CUST_47889_PI429285431	CUST_47889_PI429285431	FALSE	lncRNA	"gi|410171753|ref|XR_171360.1| PREDICTED: Homo sapiens uncharacterized LOC101060680, transcript variant 2 (LOC101060680), misc_RNA"		ncbi	-													ACTTTTTGCACCTTAAATCTGTGAAATCCTCGTGCTTTCTTCTGCCGTATCCATCGTTCA
CUST_35239_PI429285431	1.26e-05	2.11473	lncRNA		CUST_35240_PI429285431	CUST_35240_PI429285431	FALSE	lncRNA_mRNA	n342239|AL049226|mRNAlikelncRNA|Homosapiens|HumanlncRNA|JounralRNA|4729|NULL|-1.0829300|-0.3455571		NONCODERv3	"ENST00000450403,ENST00000559228"				chr15	59148025	59149445	+	exonic_sense	FAM63B	+	54629	"family with sequence similarity 63, member B"	AAACCAGCAGTGCTGCTATCAGATAAGTAGATGTCAATGTATACTTACAAGGAAAAACTA
LNCA_21_P0008530	4.18e-05	0.384136	lncRNA	XLOC_010979	LNCA_21_P0012052	LNCA_21_P0012052	FALSE	lncRNA			Agilent_HUMAN_G3V2	-	XLOC_l2_007835			chr2	243064561	243065240	+	intergenic					GCACTGCAGACTCAGCTGAGCACTGATACAAAGAAAGACAAACATCTCTTGCTTGTGGAT
CUST_32119_PI429285431	3.32e-05	0.445561	lncRNA		CUST_32119_PI429285431	CUST_32119_PI429285431	FALSE	lncRNA	n338684|AY491432|mRNAlikelncRNA|Homosapiens|HumanlncRNA|JounralRNA|1101|NULL|-1.1304300|-0.2770643		NONCODERv3	-				chr13	45006279	45006814	+	exonic_antisense	TSC22D1	-	8848	"TSC22 domain family, member 1"	TTCTTTTTAGGGATCTTGGATGTCCCATTCACCTCTCAATCTCCCACCAGCTCTAGATGA
CUST_33238_PI429285431	9.24e-09	0.470129	lncRNA		CUST_33240_PI429285431	CUST_33240_PI429285431	FALSE	lncRNA	n339942|BC037918|mRNAlikelncRNA|Homosapiens|HumanlncRNA|JounralRNA|2391|NULL|-0.5320670|-0.2532281		NONCODERv3	-				chr10	3360886	3362947	+	intergenic					GTGTCGCTTCTCTCATATTCCTATTAACATATTGGAAACGCTCAGCTAAATAGAATAAAG
LNCA_21_P0010021	1.53e-06	3.05126	lncRNA	XLOC_013688	LNCA_21_P0014102	LNCA_21_P0014102	FALSE	lncRNA	XR_108434	XR_108434	Agilent_HUMAN_G3V2	-	LOC643072	uncharacterized LOC643072		chr2	160473503	160473562	+	bidirectional	BAZ2B	-	29994	"bromodomain adjacent to zinc finger domain, 2B"	GGGGTAAAATTCTACTGCCTTTCCACGGACAAGTTAAACTGGCTGTAATGTTTATGCACT
CUST_9068_PI429285431	3.49e-07	2.87793	lncRNA		CUST_9068_PI429285431	CUST_9068_PI429285431	FALSE	lncRNA	lnc-KLF14-1:3		lncipedia2.1	-				chr7	130597710	130598435	-	intergenic					GGAAAGTGACTTTAATCCAGTTTGCTCATGCAAGAACAGACTGGCATTTCACATCCAGGA
CUST_17651_PI429285431	3.74e-08	3.32641	lncRNA		CUST_17655_PI429285431	CUST_17655_PI429285431	FALSE	lncRNA	lnc-RP11-168K9.2.1-1:1		lncipedia2.1	-				chr11	126925991	126926664	+	intergenic					TGTTTGAATTTTCTGTGCATGCAAGGAACTCCATTCTAAGTGCTGTATCTCTCGCCCATG
CUST_15805_PI429285431	2.53e-06	3.68705	lncRNA		CUST_15805_PI429285431	CUST_15805_PI429285431	FALSE	lncRNA	lnc-TOMM20-2:11		lncipedia2.1	-				chr1	235096029	235096371	-	intergenic					TTTCTGCTGACAGCACTTCCTCATTAAATGCAGAGATCTGCAAAAAGGGAAAATAAAAAC
CUST_11475_PI429285431	3.67e-06	3.8605	lncRNA		CUST_11487_PI429285431	CUST_11487_PI429285431	FALSE	lncRNA	lnc-FAM71F2-1:1		lncipedia2.1	-				chr7	128278828	128281259	+	intergenic					GCAAATACAGAATTGATGCTAGGAAGGGTACCAGGAGATAGACGCACACAGATGGGATTT
CUST_40414_PI429285431	4e-09	0.384863	lncRNA		CUST_40414_PI429285431	CUST_40414_PI429285431	FALSE	lncRNA	n409280|NR_033488_7|lncRNA|Homosapiens||RefGeneNoncode|NR_033488_7||-0.1120950|-0.3268977		NONCODERv3	-				chr6	3164344	3166613	-	intergenic					GCCTCTCTATCTTATCATGAGGGTGTTTCTCCTGCATATTTGTCTCCATCTTCCTTAATC
CUST_1711_PI429285431	2.29e-05	0.412148	lncRNA		CUST_17110_PI429285431	CUST_17110_PI429285431	FALSE	lncRNA	lnc-ETAA1-4:5		lncipedia2.1	-				chr2	67800929	67801814	+	intergenic					CAGGGCTTCTTCCTGGGTGTAACAATAAGGAATTTGGAAACTGTCTCTAGTTTTGGCCTG
LNCA_21_P0011328	2.13e-08	0.390712	lncRNA	LINC00277	LNCA_32_P221256	LNCA_32_P221256	FALSE	lncRNA	NR_003682	NR_003682	Agilent_HUMAN_G3V2	-	MGC70870	C-terminal binding protein 2 pseudogene		chr17_gl000205_random	118716	118775	+	intergenic					TCATCTGTGCATCAAATCACAAAGAATAAATAGAACTTTTCCCTTTATCAGTCCCTTAGG
LNCA_21_P0013780	1.48e-06	0.388266	lncRNA	XLOC_l2_015578	LNCA_33_P3864411	LNCA_33_P3864411	FALSE	lncRNA	NR_045000	NR_045000	Agilent_HUMAN_G3V2	-	ACTR3BP5	ARP3 actin-related protein 3 homolog B (yeast) pseudogene 5		chr10	38991167	38991226	+	intergenic					GGTTTCCCTCCTCCTTTTAACTTCAACTTTTTTGTTGACAAATACCATTCTGAAGGAATT
CUST_3241_PI429285431	1.03e-08	0.489449	lncRNA		CUST_3241_PI429285431	CUST_3241_PI429285431	FALSE	lncRNA	"transcript_id ""ENST00000518704.1"" | genecode_v17"		gencode_v17	-				chr8	99383583	99384017	-	intergenic					ATGTTTGAAGAAGAAAATATCAGAGTGACATTCCTGCTGCTGGCTCCCCTCTGATGTACC
CUST_47208_PI429285431	1.09e-10	2.16948	lncRNA		CUST_47208_PI429285431	CUST_47208_PI429285431	FALSE	lncRNA	"gi|219281870|ref|NR_026052.1| Homo sapiens CENPB DNA-binding domains containing 1 pseudogene (MGC2752), non-coding RNA"		ncbi	-				Chr19	59086766	59089765	+	intergenic					TGAGGGTCTGTGCTATTCAGTCTAGAATCAGAGTTGGATGAGAAATCAACTTTGAACACC
CUST_43915_PI429285431	1.93e-09	7.74711	lncRNA		CUST_43915_PI429285431	CUST_43915_PI429285431	FALSE	lncRNA	"gi|310118981|ref|XR_109928.1| PREDICTED: Homo sapiens AHPA9419 (LOC100131131), misc_RNA"		ncbi	-													AGTGAGTGGACATGAAATAGAGAAGTGCTGTACCTGGCAATAGCAACTGAATCTAAAAAA
CUST_32866_PI429285431	1.92e-05	2.71728	lncRNA		CUST_32866_PI429285431	CUST_32866_PI429285431	FALSE	lncRNA	n339527|AF086547|mRNAlikelncRNA|Homosapiens|HumanlncRNA|JounralRNA|1968|NULL|-1.1877900|-0.2123106		NONCODERv3	-				chr21	43724172	43724505	+	intergenic					GCGGACTTGAACTTTGTTTTCTGAAATTAGATGCCATTTATGATGATGTGATGTCAATCA
CUST_9282_PI429285431	2.36e-07	0.489276	lncRNA		CUST_9282_PI429285431	CUST_9282_PI429285431	FALSE	lncRNA	lnc-SIK1-5:3		lncipedia2.1	-				chr21	44781863	44783861	-	intergenic					ATCACGAATTCCAAGAGTGGAAACAAATCCATTCCGCAAATTTCACCCTGGCTTCTTCCT
LNCA_21_P0014610	5.18e-05	0.491372	lncRNA	LOC100506941
CUST_19962_PI429285431	1.54e-12	3.19733	lncRNA		CUST_19962_PI429285431	CUST_19962_PI429285431	FALSE	lncRNA	lnc-AC108463.1-3:1		lncipedia2.1	-				chr2	112252462	112253033	-	intergenic					CATCTTTTCCAACCTTAATGAACTGTATCCTCAAAAGAACACTATCAGACTGGCTCTGCC
CUST_36229_PI429285431	3.36e-06	0.494905	lncRNA		CUST_36229_PI429285431	CUST_36229_PI429285431	FALSE	lncRNA	n344770|NULL|lincRNA|Homosapiens|HumanlincRNA|ScriptureReconstructionLincRNAsByLuo[unpublished]|linc_luo_319|NULL|-1.3021600|-0.2854154		NONCODERv3	-				chr11	7900553	7902204	-	intergenic					CTGGTGGACACTGAGAGACAATTTTTATTTGCTGCACGTGGAAAGGACAACAACATACCT
CUST_48828_PI429285431	8.31e-09	3.61509	lncRNA		CUST_48828_PI429285431	CUST_48828_PI429285431	FALSE	lncRNA	hg19_lincRNAsTranscripts_TCONS_l2_00014356 range=chr2:243036928-243101623 5'pad=0 3'pad=0 strand=+ repeatMasking=none		UCSC	-				chr2	243036928	243037658	+	intergenic					GAAGTGAAATGACATCAAGAGACCTATCAAGACCTGTATCCAGGAAAAGACCAAACCAAT
CUST_36722_PI429285431	7.14e-05	0.445265	lncRNA		CUST_36722_PI429285431	CUST_36722_PI429285431	FALSE	lncRNA	n345206|NULL|lincRNA|Homosapiens|HumanlincRNA|ScriptureReconstructionLincRNAsByLuo[unpublished]|linc_luo_755|NULL|-1.3223500|-0.2328543		NONCODERv3	-				chr13	111418060	111418574	+	intergenic					TTGCCCTTCCTCCTTATGAAAATGTTTAATTTACTCATTGTTAGACAAAAAGGCAGACGC
CUST_36419_PI429285431	7.68e-07	2.89916	lncRNA		CUST_3641_PI429285431	CUST_3641_PI429285431	FALSE	lncRNA	"transcript_id ""ENST00000446012.1"" | genecode_v17"		gencode_v17	-				chr10	29081498	29082093	-	intergenic					TCTTCTTCATGCTCTTCTCAATGTCCTTTCTCCTTTCATTAGGTAAAATGGAGATGATCC
CUST_565_PI429285431	5.2e-06	0.472047	lncRNA		CUST_565_PI429285431	CUST_565_PI429285431	FALSE	lncRNA	"transcript_id ""ENST00000564287.1"" | genecode_v17"		gencode_v17	-				chr1	212731175	212733073	+	intergenic					GTAAATTCGTGGACTGATCTCCAAACCCTCCTACTGTGCTAATGTTGCCAATGGAAGTTT
CUST_50195_PI429285431	2e-08	5.34942	lncRNA		CUST_50195_PI429285431	CUST_50195_PI429285431	FALSE	lncRNA	hg19_lincRNAsTranscripts_TCONS_l2_00028739 range=chr9:40308743-40324812 5'pad=0 3'pad=0 strand=+ repeatMasking=none		UCSC	-				chr9	40308743	40309574	+	intergenic					AGGATCTGGGAGAGAGGAGGTGGTTGTTTATTCTGTATTGCTTTGTTTTGTTTGTTTAGC
CUST_18111_PI429285431	7.36e-08	2.55128	lncRNA		CUST_18111_PI429285431	CUST_18111_PI429285431	FALSE	lncRNA	lnc-ARRDC3-1:1		lncipedia2.1	-				chr5	90609897	90612896	-	intergenic					CTGCTCTTCTTTTGACAATTGTAAAAATCTTAAACTGACCTCCAGTTGAAATCCTCTGTC
CUST_25308_PI429285431	9.3e-05	0.496213	lncRNA		CUST_25308_PI429285431	CUST_25308_PI429285431	FALSE	lncRNA	lnc-ACHE-1:1		lncipedia2.1	-				chr7	100611326	100613408	-	exonic_antisense	MUC12	+	10071	"mucin 12, cell surface associated"	GAGCGATTCCTTATGTACCTCCTCCACCCCTCTCTTTATAAAATCTGATGATTACAAAAG
CUST_1265_PI429285431	6.1e-06	0.256837	lncRNA		CUST_1265_PI429285431	CUST_1265_PI429285431	FALSE	lncRNA	"transcript_id ""ENST00000418025.1"" | genecode_v17"		gencode_v17	-				chr2	235346972	235347533	+	intergenic					GACTGGTATGGCTCTTCCTACAAACCAGCTCATCGGCATTATAGTCTTGATCAGTTCTTG
LNCA_33_P3380361	7.21e-06	0.462732	lncRNA	PCGEM1
CUST_49843_PI429285431	3.18e-07	3.0918	lncRNA		CUST_49860_PI429285431	CUST_49860_PI429285431	FALSE	lncRNA	hg19_lincRNAsTranscripts_TCONS_l2_00026004 range=chr7:72301133-72308055 5'pad=0 3'pad=0 strand=+ repeatMasking=none		UCSC	-				chr7	72301133	72302655	+	intergenic					TTTTCTCTGCCTGTGTCTGTGGTAGGGTTAGGGAGTTGTTAGGAGAACTAAATAAGTCCA
CUST_13139_PI429285431	1.16e-08	0.436266	lncRNA		CUST_13185_PI429285431	CUST_13185_PI429285431	FALSE	lncRNA	lnc-KCNN3-2:1		lncipedia2.1	-				chr1	154674323	154675197	-	exonic_sense	KCNN3	-	3782	"potassium intermediate/small conductance calcium-activated channel, subfamily N, member 3"	ACTTAAAATACTCAAAATCCTAGAAGGTGGACTAGTGGGAAGTCTCTCTCCCTGAAGCAG
CUST_49176_PI429285431	2.43e-06	0.458965	lncRNA		CUST_49194_PI429285431	CUST_49194_PI429285431	FALSE	lncRNA	hg19_lincRNAsTranscripts_TCONS_l2_00021752 range=chr4:152182570-152184119 5'pad=0 3'pad=0 strand=+ repeatMasking=none		UCSC	-				chr4	152182570	152183112	+	intergenic					TTTCTACAAGTCTTGGATTGAGAAGTCTCCCATCTCGCTTGCTGAGTTTTCTGCTACCCT
LNCA_33_P3370521	0.00368253	0.415577	lncRNA
CUST_14516_PI429285431	2.87e-05	0.425347	lncRNA		CUST_14516_PI429285431	CUST_14516_PI429285431	FALSE	lncRNA	lnc-SIPA1L2-1:1		lncipedia2.1	-				chr1	232878113	232879264	-	intergenic					TGAAACCTCTACTCTTGATTTCTCAAGAGTAGAATTCTTTCCCAAGCCTCCCCATTTCAG
LNCA_33_P3411357	5.06e-07	2.13352	lncRNA	DGCR11
CUST_1677_PI429285431	1.86e-06	0.303766	lncRNA		CUST_1677_PI429285431	CUST_1677_PI429285431	FALSE	lncRNA	"transcript_id ""ENST00000602641.1"" | genecode_v17"		gencode_v17	-				chr4	3546282	3546913	+	intergenic					TAAAGCCATAGGTTCATTGATTTGTTCTTAAGTAGTTCTGAGTCCTTCCTGCATATCAGG
LNCA_21_P0000839	4.09e-05	0.463573	lncRNA	LOC254100	LNCA_21_P0002588	LNCA_21_P0002588	FALSE	lncRNA			Agilent_HUMAN_G3V2	-	XLOC_001432			chr2	38095379	38098973	+	intergenic					GGTCCTTCCATGCCATGTAGAGACTTTGATCTTCATCCTGCGTTTGTTTTGTTTTTCTTT
CUST_12279_PI429285431	0.00140657	0.25485	lncRNA		CUST_12279_PI429285431	CUST_12279_PI429285431	FALSE	lncRNA	lnc-GPR183-3:1		lncipedia2.1	-				chr13	100152992	100155048	-	exonic_antisense	TM9SF2	+	9375	transmembrane 9 superfamily member 2	AGTTTTTCCTTCATTCTCCCCATGATCGTGACGGTCCTTTTCTCAAAGTACTAATACTTT
CUST_22354_PI429285431	6.83e-06	2.43887	lncRNA		CUST_22354_PI429285431	CUST_22354_PI429285431	FALSE	lncRNA	lnc-PPARA-3:2		lncipedia2.1	-				chr22	46452942	46453818	+	intergenic					TACTGAGGGCAGGACTTAAGGAATGAGTTCAGAAGGTATCTATCTGGTCACTGGACAAAC
LNCA_21_P0005468	1.85e-06	0.460132	lncRNA	XLOC_006348	LNCA_21_P0009047	LNCA_21_P0009047	FALSE	lncRNA			Agilent_HUMAN_G3V2	-	XLOC_011978			chr16	65904897	65904956	-	intergenic					AGAAAGATAGATCTGTGCATGGTCATCTTAACCCTCCTGTATCCTTAAAGCCCAGCACCA
CUST_19140_PI429285431	6.5e-06	0.468652	lncRNA		CUST_19140_PI429285431	CUST_19140_PI429285431	FALSE	lncRNA	lnc-OBFC2A-8:1		lncipedia2.1	-					0	1602							GTCTTAAGCTTGGTGCCTTGAAGTCTTTTGTACTTAGTCCCATGTTTAAAATTACTACTT
LNCA_21_P0000349	3.73e-07	2.29576	lncRNA	SCARNA3	LNCA_21_P0002188	LNCA_21_P0002188	FALSE	lncRNA			Agilent_HUMAN_G3V2	-	XLOC_001406			chr2	27939839	27961152	+	intergenic					GTGCCTCTCAGCTTAGTGCTCTTCCACCCGGCTTTTCTTTCTAAAAACACCCTCTTTTTT
CUST_8435_PI429285431	1.68e-07	0.403217	lncRNA		CUST_8435_PI429285431	CUST_8435_PI429285431	FALSE	lncRNA	lnc-WDR74-1:12		lncipedia2.1	-				chr11	62622896	62623473	-	bidirectional	SLC3A2	+	6520	"solute carrier family 3 (activators of dibasic and neutral amino acid transport), member 2"	AAAGTTTTCTGGTTCCTCTTGTTCTCTGTAGTGATGTTTCTAGATAGATGCCCACTGATA
CUST_22622_PI429285431	1.76e-06	9.02902	lncRNA		CUST_22622_PI429285431	CUST_22622_PI429285431	FALSE	lncRNA	lnc-SLC9A4-1:1		lncipedia2.1	-				chr2	103056053	103057379	+	intronic_sense	IL18RAP	+	8807	interleukin 18 receptor accessory protein	ACTACCCAGGGGTATCAGGAGGAGTGAAAGAACACTAGGAGAGGACTAATAGTTAAAAGA
CUST_40206_PI429285431	2.91e-07	0.459327	lncRNA		CUST_40206_PI429285431	CUST_40206_PI429285431	FALSE	lncRNA	n408037|NR_027822|lncRNA|Homosapiens||RefGeneNoncode|NR_027822||-0.2538840|-0.2061593		NONCODERv3	-				chr6	1520254	1523253	+	intergenic					TTTGTTTAATATTCACACGCTATAGAGTGCTTCCTCCAGCTCCTCAGTCTTCAGGACAGC
CUST_17744_PI429285431	5.31e-08	0.400554	lncRNA		CUST_17744_PI429285431	CUST_17744_PI429285431	FALSE	lncRNA	lnc-PRKCE-1:1		lncipedia2.1	-				chr2	45559950	45560567	+	intergenic					GACGCCTACTGTCTCTACTGTCTCACAGATCTGCATTGGGTTTCCTTGGTCCCAATCCCC
CUST_29699_PI429285431	1.5e-09	2.09129	lncRNA		CUST_29699_PI429285431	CUST_29699_PI429285431	FALSE	lncRNA	n333364|BC001876|mRNAlikelncRNA|Homosapiens|NULL|H-invitationalv7.5|HIT000086102_05|http://h-invitational.jp/hinv/spsoup/transcript_view?hit_id=HIT000086102_05|0.1738870|-0.3107132		NONCODERv3	-				chr6	3081111	3082066	+	exonic_sense	RIPK1	+	8737	receptor (TNFRSF)-interacting serine-threonine kinase 1 (EC:2.7.11.1)	GGAATGTGAAGGTGTGTGCGGAAAATCCTTAGAGTTCAGATATGGCCTAAGAGTGAGATC
CUST_20851_PI429285431	0.000358335	0.282932	lncRNA		CUST_20851_PI429285431	CUST_20851_PI429285431	FALSE	lncRNA	lnc-ANKRD10-3:1		lncipedia2.1	-				chr13	111797032	111797352	-	intronic_antisense	ARHGEF7	+	8874	Rho guanine nucleotide exchange factor (GEF) 7	CTCCCCCAAAAAGTCTTCAGCATACTAAGCAAGTCGTTTACTGGAAGAAATTTAAACCTT
CUST_50602_PI429285431	1.04e-06	0.451805	lncRNA		CUST_50602_PI429285431	CUST_50602_PI429285431	FALSE	lncRNA	hg19_lincRNAsTranscripts_TCONS_l2_00003718 range=chr10:96857903-96880251 5'pad=0 3'pad=0 strand=- repeatMasking=none		UCSC	-				chr10	96860903	96860969	-	intergenic					GCATAGGGAAGAAGGTTGAAGGAGTGTCATTTATGAACAGAGCATTCTCCCTTTGGCTTT
LNCA_21_P0014503	7.14e-08	2.51996	lncRNA	LOC100507398
LNCA_33_P3255716	8.96e-12	0.367264	lncRNA	LOC285095
LNCA_21_P0012901	1.94e-10	0.364539	lncRNA	XLOC_l2_011996	LNCA_33_P3345479	LNCA_33_P3345479	FALSE	lncRNA_mRNA	NR_027033	NR_027033	Agilent_HUMAN_G3V2	ENST00000360737	MIRLET7BHG	MIRLET7B host gene (non-protein coding)		chr22	46505802	46505861	+	intergenic					AGAACGAGAAAGGCCGAATGAGGGAAACTGAGTCACATCTGCTTCTCCCAGGTGGGGCTG
CUST_13089_PI429285431	3.69e-06	0.478736	lncRNA		CUST_13095_PI429285431	CUST_13095_PI429285431	FALSE	lncRNA	lnc-CDC42-1:2		lncipedia2.1	-				chr1	22584152	22584651	+	intergenic					GCCAGCTCCTCAGAGCTCTGTAGGTTACCCCGTGAGACCTTCTCCCTGCACGCCTTTTTT
LNCA_19_P00812314	1.77e-05	0.489315	lncRNA	XLOC_l2_001890	LNCA_21_P0001317	LNCA_21_P0001317	FALSE	lncRNA			Agilent_HUMAN_G3V2	-	XLOC_000247			chr1	71304682	71304741	+	intergenic					AATGTTGGAAGAACCCCAGGAGTCTGTCTTCCCAATTGCCCTGTTTTCTACTTCTCCTAA
CUST_6662_PI429285431	1.61e-07	0.497786	lncRNA		CUST_6662_PI429285431	CUST_6662_PI429285431	FALSE	lncRNA	"transcript_id ""ENST00000439450.1"" | genecode_v17"		gencode_v17	-				chr20	22201192	22201630	+	intergenic					CTTCAATAGTGAATTAGGTTCCCTCTACCATCTGAAATGTTACAGTTCGATAAAATAGGT
CUST_15002_PI429285431	4.1e-05	0.462094	lncRNA		CUST_15002_PI429285431	CUST_15002_PI429285431	FALSE	lncRNA	lnc-LSM3-1:2		lncipedia2.1	-				chr3	14271205	14272430	+	intergenic					ACATGAGGTGTGAAGAGGGACAGCATTTTCAGAAACTTTGAGTGCCGTTTTCCCTCTTGA
LNCA_19_P00322671	9.8e-09	0.259926	lncRNA	LINC00277	LNCA_19_P00808382	LNCA_19_P00808382	FALSE	lncRNA	NR_038883	NR_038883	Agilent_HUMAN_G3V2	-	LOC100506334	uncharacterized LOC100506334		chr21	35341986	35342045	+	intergenic					GAATTAGAGTTAATGATAGCTCTAGATTGCCTCTGCCATGCTATTTAAAGTCCTGCTTTA
CUST_4995_PI429285431	2.34e-08	0.450987	lncRNA		CUST_49951_PI429285431	CUST_49951_PI429285431	FALSE	lncRNA	hg19_lincRNAsTranscripts_TCONS_l2_00026208 range=chr7:128262528-128266584 5'pad=0 3'pad=0 strand=+ repeatMasking=none		UCSC	-				chr7	128262528	128263191	+	intergenic					AATATAGAAAATGGATGGACAAGTAAATCCCACTCAGCACCCATAGTCCAGGCATGGGGA
LNCA_32_P41375	1.49e-11	4.9352	lncRNA	FLJ45340
CUST_30238_PI429285431	1.28e-07	2.05419	lncRNA		CUST_30251_PI429285431	CUST_30251_PI429285431	FALSE	lncRNA_mRNA	n335127|AY187237|mRNAlikelncRNA|Homosapiens|NULL|H-invitationalv7.5|HIT000250922|http://h-invitational.jp/hinv/spsoup/transcript_view?hit_id=HIT000250922|1.7043200|-0.1108876		NONCODERv3	"ENST00000534057,ENST00000300589"				chr16	50746105	50746439	+	exonic_sense	NOD2	+	64127	nucleotide-binding oligomerization domain containing 2	ACATTGGCAGTGTGGGTGCCCAAGCCTTGGCACTGATGCTGGCAAAGAACGTCATGCTAG
CUST_1748_PI429285431	6.45e-07	0.459661	lncRNA		CUST_1748_PI429285431	CUST_1748_PI429285431	FALSE	lncRNA	"transcript_id ""ENST00000412595.3"" | genecode_v17"		gencode_v17	-				chr4	39549456	39550063	+	intergenic					TTAAGCCATTCTGGCCCTTTCTGCTCTACTTTACCAGCTATAGAGTTAGGAAGGCTTCCA
LNCA_19_P00322184	1.15e-05	2.11003	lncRNA	LOC100506119	LNCA_19_P00804740	LNCA_19_P00804740	FALSE	lncRNA	NR_027696	NR_027696	Agilent_HUMAN_G3V2	-	FLJ39653	uncharacterized FLJ39653	GO:0016020(membrane)|GO:0016021(integral to membrane)	chr4	16259054	16259113	+	intergenic					AAAGTTCCTGATTGCAACTTACCGCTACCTTGCTCTTCCCTATCTTGGTTGCTTGAGTCA
LNCA_21_P0008754	8.02e-07	0.464595	lncRNA	XLOC_011519	LNCA_21_P0012285	LNCA_21_P0012285	FALSE	lncRNA			Agilent_HUMAN_G3V2	-	XLOC_l2_009468			chr22	20958930	20958989	-	intergenic					ATCATTCTTTAGTCTTTAAAAGTCCTCCAGCAGAAGCTGCTCCTCCCGTCACTCAGTGAT
CUST_18829_PI429285431	4.23e-08	0.37928	lncRNA		CUST_18829_PI429285431	CUST_18829_PI429285431	FALSE	lncRNA	lnc-ARHGEF35-1:2		lncipedia2.1	-				chr7	144052431	144053003	-	exonic_antisense	ARHGEF5	+	7984	Rho guanine nucleotide exchange factor (GEF) 5	CAGTAGTGAAATGGTGAAAAATCAGACAATGGTCACAGAGTTCCTCCTACTGGGATTTCT
CUST_28171_PI429285431	0.0188043	0.216223	lncRNA		CUST_28171_PI429285431	CUST_28171_PI429285431	FALSE	lncRNA	n325449|NULL|mRNAlikelncRNA|Homosapiens|vegalncRNA|GENCODE|OTTHUMT00000323698|http://vega.sanger.ac.uk/Homo_sapiens/Transcript/Summary?db=core;t=OTTHUMT00000323698|-1.2049200|-0.3182130		NONCODERv3	-				chr2	6886461	6886966	-	intergenic					GCCCCTTAAATTAATCCCCCAAACTGCATCCTGTATAATCCTTCTAAGATGCAAATGTGA
CUST_25951_PI429285431	2.71e-06	2.25167	lncRNA		CUST_2595_PI429285431	CUST_2595_PI429285431	FALSE	lncRNA	"transcript_id ""ENST00000426008.1"" | genecode_v17"		gencode_v17	-				chr6	108444719	108445435	+	intergenic					ATGAAATCCTCTGATTCAACAGAAATCTGGAAGTGTTCACAGCTTGGCCCGGAGAAGATC
LNCA_21_P0006250	1.02e-07	0.414502	lncRNA	XLOC_007638	LNCA_21_P0009984	LNCA_21_P0009984	FALSE	lncRNA			Agilent_HUMAN_G3V2	-	LOC284757	uncharacterized LOC284757		chr20	58899541	58899597	+	intergenic					ACATGCTGGATACCTGAGGACTCCAGAGCTACTATCTGCTCATATCTGCTCAACATTAAA
CUST_38954_PI429285431	1.41e-07	0.430908	lncRNA		CUST_38964_PI429285431	CUST_38964_PI429285431	FALSE	lncRNA_mRNA	n385179|NULL|lncRNA|Homosapiens||UCSCGeneNoncode|uc003tsr.3||3.4519700|-0.1878601		NONCODERv3	ENST00000456890				chr7	62856724	62859002	-	intergenic					ATGCTCTTTCTCTGCAGATTAGGCCTCATGTTATATAGGAGAGATGTGAGGGCTGTGTCT
CUST_29024_PI429285431	3.9e-05	0.468845	lncRNA		CUST_29024_PI429285431	CUST_29024_PI429285431	FALSE	lncRNA	n326514|NULL|mRNAlikelncRNA|Homosapiens|vegalncRNA|GENCODE|OTTHUMT00000030152|http://vega.sanger.ac.uk/Homo_sapiens/Transcript/Summary?db=core;t=OTTHUMT00000030152|-1.2890200|-0.3860130		NONCODERv3	-				chr1	95748483	95749922	+	intergenic					ATAGCAATGACTAAGTTGTGCAAACATCATCAACTTTGCAATTACTCTCCTCCTCACTTT
LNCA_21_P0005950	6.52e-08	0.390095	lncRNA	XLOC_006924	LNCA_21_P0009578	LNCA_21_P0009578	FALSE	lncRNA			Agilent_HUMAN_G3V2	-	XLOC_012880			chr18	71266056	71266115	-	intergenic					TGACTGGTATATCTTTTTGATGCTCTGTCATCTCCCTTCCATTCCCACTCTCTTAGTGTA
CUST_17451_PI429285431	2.97e-08	3.6281	lncRNA		CUST_17451_PI429285431	CUST_17451_PI429285431	FALSE	lncRNA	lnc-EGLN1-1:2		lncipedia2.1	-				chr1	231664166	231664630	-	exonic_antisense	TSNAX	+	7257	translin-associated factor X	TAACTTGGCTAGAATATGGCAGTAACTACAAGGCATGTTCTGCTCTGGCACGAAGACAAC
LNCA_24_P68222	3.57e-08	2.2945	lncRNA	CD99P1
CUST_1833_PI429285431	1.28e-06	0.413763	lncRNA		CUST_1833_PI429285431	CUST_1833_PI429285431	FALSE	lncRNA	"transcript_id ""ENST00000506148.1"" | genecode_v17"		gencode_v17	-				chr4	105828514	105828985	+	intergenic					AAGACTGATCATTCTAAGGAGGATTTTGTGCTGCTCTTGTTTTGCTGCTGGGCCTATCCT
CUST_34774_PI429285431	0.00977687	0.489039	lncRNA		CUST_34774_PI429285431	CUST_34774_PI429285431	FALSE	lncRNA	n341683|BC042185|mRNAlikelncRNA|Homosapiens|HumanlncRNA|JounralRNA|4154|NULL|3.0702900|-0.1083644		NONCODERv3	-				chr9	35646266	35647229	+	intergenic					GGTTCCTCCTCTGTGGCTTCCTGTGGCACTCCAAGTGGGAAGAAGAGAAGCTTGGAAGTG
CUST_17655_PI429285431	5.68e-08	0.355988	lncRNA		CUST_1765_PI429285431	CUST_1765_PI429285431	FALSE	lncRNA	"transcript_id ""ENST00000508241.1"" | genecode_v17"		gencode_v17	-				chr4	55242169	55242708	+	intergenic					TGACCCTGCCACATTGTATATTCTTGTTCTCCCCCCATGATGCATTTTATTTCAGTATCC
LNCA_21_P0006866	1.02e-09	0.333248	lncRNA	LOC100506853	LNCA_21_P0010462	LNCA_21_P0010462	FALSE	lncRNA_mRNA	NR_027006	NR_027006	Agilent_HUMAN_G3V2	ENST00000543388	LOC400891	chromosome 14 open reading frame 166B pseudogene		chr22	21403111	21403170	+	intergenic					TGCAACCCCAGGACAGTTAACCTGTAAGTCCCCTTCCTCAGCCTCAGACCTGGAGGTTTG
CUST_7015_PI429285431	1.85e-06	0.291086	lncRNA		CUST_7015_PI429285431	CUST_7015_PI429285431	FALSE	lncRNA	"transcript_id ""ENST00000422914.1"" | genecode_v17"		gencode_v17	-				chrX	5571462	5572321	-	intergenic					CATCTTGCTCTCCCAACTTCTTGCTTTGACCAAATTGAATAAATCTTGTTTGATCTCCAA
LNCA_21_P0010596	3.52e-06	0.431746	lncRNA	XLOC_l2_000735	LNCA_21_P0014722	LNCA_21_P0014722	FALSE	lncRNA	XR_112759	XR_112759	Agilent_HUMAN_G3V2	-	H2AFY	"H2A histone family, member Y"	GO:0000786(nucleosome)|GO:0000793(condensed chromosome)|GO:0001740(Barr body)|GO:0003677(DNA binding)|GO:0003682(chromatin binding)|GO:0005634(nucleus)|GO:0006334(nucleosome assembly)|GO:0007549(dosage compensation)|GO:0016568(chromatin modification)	chr5	134689243	134689302	-	intronic_sense	H2AFY	-	9555	"H2A histone family, member Y"	TAAATGTTACTAAGCAAGAGACTATTCTCACTTTTTGCCACCCTGAGCAGGGCAGGGAAG
LNCA_21_P0009116	1.79e-07	0.415835	lncRNA	XLOC_011826	LNCA_21_P0012700	LNCA_21_P0012700	FALSE	lncRNA			Agilent_HUMAN_G3V2	-	XLOC_l2_011407			chr4	187422366	187422425	-	intergenic					CGCTGCTCGTTATTATTCCTGAAACGCCCAGTACCACTTCCTGTTCTTACTCATTTATTT
CUST_49903_PI429285431	3.92e-07	0.459258	lncRNA		CUST_49946_PI429285431	CUST_49946_PI429285431	FALSE	lncRNA	hg19_lincRNAsTranscripts_TCONS_l2_00026198 range=chr7:128214774-128259236 5'pad=0 3'pad=0 strand=+ repeatMasking=none		UCSC	-				chr7	128214774	128215467	+	intergenic					AGAAAAGATGATGATTATTCCCCACCTTCTAAGAGACAAAGACCAACGAGCCACCACAGC
CUST_50333_PI429285431	3.17e-09	2.26906	lncRNA		CUST_50333_PI429285431	CUST_50333_PI429285431	FALSE	lncRNA	hg19_lincRNAsTranscripts_TCONS_l2_00029080 range=chr9:132264726-132275305 5'pad=0 3'pad=0 strand=+ repeatMasking=none		UCSC	-				chr9	132264726	132267725	+	intergenic					AGGAGATGCTCCCCAAATTAGCCATCATGAGCGCTGGCTCTGGGGGTTGGGCGTTGGGGA
CUST_10572_PI429285431	3.8e-07	0.481481	lncRNA		CUST_10584_PI429285431	CUST_10584_PI429285431	FALSE	lncRNA	lnc-EFNA5-2:1		lncipedia2.1	-				chr5	106346641	106347366	-	intergenic					TCCCCCTCCCACTGTAGACTTCAGTTTTAATAATGATTAAAGAATAATGCCTGAATCCCA
CUST_34424_PI429285431	3.32e-07	0.473871	lncRNA		CUST_34424_PI429285431	CUST_34424_PI429285431	FALSE	lncRNA	n341298|CR603563|mRNAlikelncRNA|Homosapiens|HumanlncRNA|JounralRNA|3767|NULL|-1.0984000|-0.2979541		NONCODERv3	-				chr7	107588858	107590471	-	intronic_sense	LAMB1	-	3912	"laminin, beta 1"	CAGGTTCTAGATCCAGGTGTTTCATTTTCCCCTTGTTTTCCCACTACATTGTCATCTCTC
CUST_22361_PI429285431	3.09e-08	0.314273	lncRNA		CUST_22361_PI429285431	CUST_22361_PI429285431	FALSE	lncRNA	lnc-AC005008.2.1-1:1		lncipedia2.1	-				chr7	81656971	81659621	+	intronic_antisense	CACNA2D1	-	781	"calcium channel, voltage-dependent, alpha 2/delta subunit 1"	TACATGGTTCCTTGTTCCTGGAGGGGATATCCATTTGAAACAGATATAAATATGTGTGGA
CUST_11114_PI429285431	0.00256749	0.475569	lncRNA		CUST_11163_PI429285431	CUST_11163_PI429285431	FALSE	lncRNA	lnc-ARFGEF2-2:1		lncipedia2.1	-				chr20	47103837	47106836	+	intergenic					AGAGCAGCATTGGCTCCTCCCCAGGTCTCCAGCTCCACCATCATCAAACTTGAATGGCAG
CUST_25189_PI429285431	3.89e-08	0.333568	lncRNA		CUST_25189_PI429285431	CUST_25189_PI429285431	FALSE	lncRNA	lnc-RPS21-1:4		lncipedia2.1	-				chr20	60931248	60931693	+	intronic_antisense	LAMA5	-	3911	"laminin, alpha 5"	CAGCTCAGCTGCCAGTGCTGACCTTTCCGCTGCTACATGGTTCTGTGCAGAAAGAAAAAA
CUST_7709_PI429285431	4.41e-09	0.308845	lncRNA		CUST_7709_PI429285431	CUST_7709_PI429285431	FALSE	lncRNA	lnc-DET1-1:1		lncipedia2.1	-				chr15	89052473	89055003	-	intergenic					AACCAGTCTTTGAGTATGGAGTTAACAAGAAAGCTGAGTGTTGGGCGGCTTTTTTGTGGA
LNCA_19_P00322939	2.15e-05	0.497707	lncRNA	PVT1	LNCA_21_P0000238	LNCA_21_P0000238	FALSE	lncRNA	NR_002433	NR_002433	Agilent_HUMAN_G3V2	-	SNORD12C	"small nucleolar RNA, C/D box 12C"		chr20	47895501	47895560	+	bidirectional	ZNFX1	-	57169	"zinc finger, NFX1-type containing 1"	TTTTTCCCCATCAGATCGACAATGCTGACGTCTTATATTTTGCCAGTTAGTTCTGATACA
CUST_39122_PI429285431	2.55e-08	2.92393	lncRNA		CUST_39122_PI429285431	CUST_39122_PI429285431	FALSE	lncRNA	n385705|NULL|lncRNA|Homosapiens||UCSCGeneNoncode|uc004bxz.1||0.2090010|-0.1446449		NONCODERv3	-				chr9	132264675	132266185	+	intergenic					ATGCAGGCCATCGATGGAAATGTCAGACAGTGCGAGTCCACGCCTGAACACTTCTGGGGT
CUST_16103_PI429285431	2.16e-08	0.471205	lncRNA		CUST_16103_PI429285431	CUST_16103_PI429285431	FALSE	lncRNA	lnc-PKDCC-2:1		lncipedia2.1	-				chr2	42119669	42120553	+	intergenic					ATGGGCACGCCTCTTTACAGAACCAAAGATTCAGAACTGTGCCTTACCCTTTGCTTATGA
LNCA_21_P0012893	1.89e-08	15.3018	lncRNA	LOC285696	LNCA_33_P3343820	LNCA_33_P3343820	FALSE	lncRNA_mRNA	NR_028344	NR_028344	Agilent_HUMAN_G3V2	ENST00000370535	RP1-177G6.2	uncharacterized LOC286411		chrX	139795889	139795948	+	intergenic					CATGGACACCCCAATCCCCGTATCATTAGACTCTCCCAGAGGCACGTATGTACTGCTTAA
CUST_23022_PI429285431	1.18e-05	0.428813	lncRNA		CUST_23022_PI429285431	CUST_23022_PI429285431	FALSE	lncRNA	lnc-SHANK2-6:1		lncipedia2.1	-				chr11	70034139	70034784	-	exonic_antisense	ANO1	+	55107	"anoctamin 1, calcium activated chloride channel"	AGAAAGGAAAATGTCCTATCAGAAAGTGGTCCTCCATGTTTGCAGAAAACCCAGGACCCA
CUST_37166_PI429285431	2.68e-07	0.410955	lncRNA		CUST_37175_PI429285431	CUST_37175_PI429285431	FALSE	lncRNA_mRNA	n345609|NULL|lincRNA|Homosapiens|HumanlincRNA|ScriptureReconstructionLincRNAsByLuo[unpublished]|linc_luo_1158|NULL|-1.3460000|-0.3733471		NONCODERv3	ENST00000292782				chr3	182655945	182657160	+	intergenic					TTTAATTAGCATTGTCCCTTAGCCATTTCATTAATTGGTCTTCCCCCAACCTTATGCCCT
CUST_15186_PI429285431	1.15e-08	0.442679	lncRNA		CUST_15186_PI429285431	CUST_15186_PI429285431	FALSE	lncRNA	lnc-TSC22D1-1:4		lncipedia2.1	-				chr13	44979750	44980982	-	intergenic					ATTCCTACTTTTAAGAACTCCCCACGCCCGTCCTAAGTGATTGTGATTCCCAGTAAGTGA
CUST_26652_PI429285431	2.78e-05	0.480175	lncRNA		CUST_26652_PI429285431	CUST_26652_PI429285431	FALSE	lncRNA	lnc-DLEU7-3:2		lncipedia2.1	-				chr13	51746124	51746949	-	intergenic					TCGAGAAAGACTTTGGGAGCGGACGGTGCCCTGACTCCATCTGGATTCCTTGACGTGTCT
LNCA_21_P0012993	4.93e-07	4.67734	lncRNA	XLOC_l2_012081	LNCA_33_P3355783	LNCA_33_P3355783	FALSE	lncRNA	XR_132896	XR_132896	Agilent_HUMAN_G3V2	-				chr11	61534787	61534846	+	intronic_sense	MYRF	+			TCATGTGCCTATGATTGCGTGAGCTCATCAGCCTTCCTGGGTATCCAGCTCCTGGGAGAC
CUST_48983_PI429285431	1.56e-05	0.470482	lncRNA		CUST_48983_PI429285431	CUST_48983_PI429285431	FALSE	lncRNA	hg19_lincRNAsTranscripts_TCONS_l2_00019097 range=chr3:195663403-195673039 5'pad=0 3'pad=0 strand=+ repeatMasking=none		UCSC	-				chr3	195666403	195669402	+	intergenic					TAGAACATCAGCTCCTCCCTGAGTCTCCAACTGAAAGACCCTCAACGCGAACAACATCAG
LNCA_21_P0007066	4.86e-06	0.462886	lncRNA	XLOC_008504	LNCA_21_P0010680	LNCA_21_P0010680	FALSE	lncRNA	NR_038426	NR_038426	Agilent_HUMAN_G3V2	-	LOC100506795	uncharacterized LOC100506795		chr1	234666855	234666914	-	intergenic					CTCTGTGAATAATCATCACAAATATTTACTGAGCATCCTTCATCTCCTGGAAGCCTCGTG
CUST_5793_PI429285431	2.67e-07	2.61404	lncRNA		CUST_5793_PI429285431	CUST_5793_PI429285431	FALSE	lncRNA	"transcript_id ""ENST00000578929.1"" | genecode_v17"		gencode_v17	-				chr17	25641669	25642952	+	intergenic					AATTCTTTTCCATCAGAAGTAAGAGCTGTTGGCAGCAACTAATAAAATGCAACCTAGTGA
CUST_13243_PI429285431	1.72e-06	0.400596	lncRNA		CUST_13243_PI429285431	CUST_13243_PI429285431	FALSE	lncRNA	lnc-TMEM106A-1:1		lncipedia2.1	-				chr17	41393607	41394062	+	intergenic					CAAAAGTAGGCTTTACATTTTTGCTCGTTTTCTTTTGGGTCTGTGGCTAGTCTCCACTTC
CUST_36868_PI429285431	1.16e-06	0.459282	lncRNA		CUST_36868_PI429285431	CUST_36868_PI429285431	FALSE	lncRNA	n345337|NULL|lincRNA|Homosapiens|HumanlincRNA|ScriptureReconstructionLincRNAsByLuo[unpublished]|linc_luo_886|NULL|-1.3929800|-0.2393409		NONCODERv3	-				chr16	81417176	81418911	+	intergenic					TTCTTTTCGTTTTGAATTCAGCTTGTGTTTGGTTCCTCGGTCTTGTACCCCTTCAGTTCG
CUST_48681_PI429285431	2.97e-05	3.98452	lncRNA		CUST_48681_PI429285431	CUST_48681_PI429285431	FALSE	lncRNA	hg19_lincRNAsTranscripts_TCONS_l2_00013854 range=chr2:102578558-102603782 5'pad=0 3'pad=0 strand=+ repeatMasking=none		UCSC	-				chr2	102581558	102581635	+	intergenic					AAAGGCTGTGTGTGGATGGTGACGCTGAGGTTTTATCTTCAAGTGAGTTGTGCATATGAG
CUST_48886_PI429285431	2.15e-05	0.40137	lncRNA		CUST_48886_PI429285431	CUST_48886_PI429285431	FALSE	lncRNA	hg19_lincRNAsTranscripts_TCONS_l2_00018665 range=chr3:75721315-75725140 5'pad=0 3'pad=0 strand=+ repeatMasking=none		UCSC	-				chr3	75721315	75722146	+	intergenic					ATTCCTTTGTTGGCTCCTCCCTGTCCTCTTGGTGCTGTGGGCCCTGAAAGTTGTCGAGTG
CUST_16913_PI429285431	5.31e-08	0.454232	lncRNA		CUST_16913_PI429285431	CUST_16913_PI429285431	FALSE	lncRNA	lnc-POLN-1:3		lncipedia2.1	-				chr4	2025132	2025578	-	intergenic					CTTAACCCAACACTGTAAAGGCTCTCCTCATGAACAAAGCATTAGTAGTCTAGATAAAAT
CUST_51224_PI429285431	8.67e-08	0.473871	lncRNA		CUST_51224_PI429285431	CUST_51224_PI429285431	FALSE	lncRNA	hg19_lincRNAsTranscripts_TCONS_l2_00008916 range=chr15:22448413-22473375 5'pad=0 3'pad=0 strand=- repeatMasking=none		UCSC	-				chr15	22448413	22448830	-	intergenic					GTCGAGTCACCATATCAGTAGACAAGTCCAAGAACCAGTTCTCCCTGAACCTGAGATCTG
CUST_38214_PI429285431	1.45e-06	2.51062	lncRNA		CUST_38214_PI429285431	CUST_38214_PI429285431	FALSE	lncRNA	n381580|NULL|lncRNA|Homosapiens||UCSCGeneNoncode|uc001lnz.2||0.6383440|-0.1912934		NONCODERv3	-				chr11	141452	142882	-	intergenic					TTTTTGTTATTAAAAGCTGGACCTACCATGAAAGACTTCTGAATCCAGGAAGAGAAACTG
CUST_38323_PI429285431	2.07e-08	2.18685	lncRNA		CUST_38323_PI429285431	CUST_38323_PI429285431	FALSE	lncRNA	n382036|NULL|lncRNA|Homosapiens||UCSCGeneNoncode|uc001vdz.2||1.0482600|-0.4241192		NONCODERv3	-				chr13	50618045	50619220	-	intergenic					CCAACTGCTTGAAGAATCTCCTTGTTATTTGTATTATTTGCTATAGGGTTAGATGTTGAG
CUST_38625_PI429285431	2.68e-05	0.465456	lncRNA		CUST_38625_PI429285431	CUST_38625_PI429285431	FALSE	lncRNA	n383801|NULL|lncRNA|Homosapiens||UCSCGeneNoncode|uc002vea.2||3.5309900|-0.3208707		NONCODERv3	-				chr2	211097415	211098699	+	intergenic					TCTGTCCATTCCCACTACCAGAAAGAAACTCTGTGTTAGTTTTTCTTTTACCTTTATTGA
CUST_27192_PI429285431	3.8e-09	0.434397	lncRNA		CUST_27192_PI429285431	CUST_27192_PI429285431	FALSE	lncRNA	n324323|NULL|mRNAlikelncRNA|Homosapiens|vegalncRNA|GENCODE|OTTHUMT00000042929|http://vega.sanger.ac.uk/Homo_sapiens/Transcript/Summary?db=core;t=OTTHUMT00000042929|0.1331520|-0.1936068		NONCODERv3	-				chr6	160240207	160240801	+	exonic_sense	PNLDC1	+	154197	poly(A)-specific ribonuclease (PARN)-like domain containing 1	ATGAATAAAACCGAAACAAGGCAAAAAGCCAGCCATTCTTCTCTCCTTCCCTAACTCTAT
CUST_44242_PI429285431	9.54e-06	0.425515	lncRNA		CUST_44242_PI429285431	CUST_44242_PI429285431	FALSE	lncRNA	"gi|242247281|ref|NR_027898.1| Homo sapiens collagen, type VI, alpha 4 pseudogene 2 (COL6A4P2), non-coding RNA"		ncbi	-				Chr3	129934663	129937662	+	intergenic					ATATTATTCTAGTTGACCTCTTCTCCCTTGCCTCCTGCTGTCTAACTGGTCTGCTTTCTT
CUST_34371_PI429285431	0.00131345	2.10073	lncRNA		CUST_34392_PI429285431	CUST_34392_PI429285431	FALSE	lncRNA	n341262|AK129997|mRNAlikelncRNA|Homosapiens|HumanlncRNA|JounralRNA|3730|NULL|-0.9583150|-0.4217670		NONCODERv3	-				chr7	78802388	78804339	-	intronic_sense	MAGI2	-	9863	"membrane associated guanylate kinase, WW and PDZ domain containing 2"	CAGGTCCCTTCCTCATCACTCTAAATTTTAAGATTTATCAGAGCTAGTCTTCCATATTTA
CUST_9315_PI429285431	2.76e-06	0.491225	lncRNA		CUST_9315_PI429285431	CUST_9315_PI429285431	FALSE	lncRNA	lnc-METTL11A-5:1		lncipedia2.1	-				chr9	132173685	132174417	+	intergenic					TCATTTTGTCACAAACTTTGCCCAGGGCTCCGACTCTCGCATCAGCTAAACCCTCTGAAC
CUST_50622_PI429285431	2.45e-07	2.49858	lncRNA		CUST_50622_PI429285431	CUST_50622_PI429285431	FALSE	lncRNA	hg19_lincRNAsTranscripts_TCONS_l2_00003387 range=chr10:6335137-6335689 5'pad=0 3'pad=0 strand=- repeatMasking=none		UCSC	-				chr10	6335137	6335381	-	intergenic					AATTGCAGACATACTGTCAACATCTGGGACTCGAGTTACTATTACAATCATGTCTTCTTT
CUST_40417_PI429285431	8.15e-08	0.424318	lncRNA		CUST_40417_PI429285431	CUST_40417_PI429285431	FALSE	lncRNA	n409283|NR_033489_3|lncRNA|Homosapiens||RefGeneNoncode|NR_033489_3||-0.8320150|-0.2855222		NONCODERv3	-				chr6	2985531	2987425	-	intergenic					TCTATAATACCCAAGCCTACGTTTTGGAACTAAACCCCACGCCCTTTGTGTGAAAGCCAT
CUST_29232_PI429285431	3.39e-07	3.08814	lncRNA		CUST_29232_PI429285431	CUST_29232_PI429285431	FALSE	lncRNA	n326763|NULL|mRNAlikelncRNA|Homosapiens|vegalncRNA|GENCODE|OTTHUMT00000007037|http://vega.sanger.ac.uk/Homo_sapiens/Transcript/Summary?db=core;t=OTTHUMT00000007037|-0.9695520|-0.1998058		NONCODERv3	-				chr1	154267	155238	-	intergenic					ATCCAGGAAGAGAAACTGACTGGGCAACATGTTATTCAGGTACAAAAAGACTTGGACTGG
CUST_49225_PI429285431	3.29e-08	0.454605	lncRNA		CUST_49241_PI429285431	CUST_49241_PI429285431	FALSE	lncRNA	hg19_lincRNAsTranscripts_TCONS_l2_00023040 range=chr5:102749590-102766255 5'pad=0 3'pad=0 strand=- repeatMasking=none		UCSC	-				chr5	102749590	102749834	-	intergenic					ATATCGAATGTGACATTGAGGCTGAACCACCATCCTCACCTCCACCATTTTGTCAAGTTC
LNCA_33_P3390955	1.57e-06	0.247503	lncRNA	HPVC1
CUST_1404_PI429285431	2.27e-05	0.340293	lncRNA		CUST_1404_PI429285431	CUST_1404_PI429285431	FALSE	lncRNA	"transcript_id ""ENST00000484675.1"" | genecode_v17"		gencode_v17	-				chr3	99226031	99226495	-	intergenic					GGCAGCTAATTTCTCCCTTAATTAGTTGTAACACCGTTTATGCAAAACAAAGGATTTTCT
CUST_43026_PI429285431	8.75e-06	3.11417	lncRNA		CUST_43026_PI429285431	CUST_43026_PI429285431	FALSE	lncRNA	ENST00000516309 ncrna:snRNA chromosome:GRCh37:10:12498482:12498630:1 gene:ENSG00000252118 gene_biotype:snRNA transcript_biotype:snRNA		ensembl.GRCh37.72	-				chr10	12498482	12498630	+	intronic_sense	CAMK1D	+	57118	calcium/calmodulin-dependent protein kinase ID (EC:2.7.11.17)	GTGACAAGAATGGAAAACATTCTCAGGACCTATACCACACATATACATTTAAAGTATCAC
CUST_46078_PI429285431	3.85e-08	2.10829	lncRNA		CUST_46086_PI429285431	CUST_46086_PI429285431	FALSE	lncRNA_mRNA	"gi|342672085|ref|NR_040718.1| Homo sapiens Ras association (RalGDS/AF-6) domain family member 3 (RASSF3), transcript variant 2, non-coding RNA"		ncbi	ENST00000542104				Chr12	65004293	65007292	+	intergenic					GCAGCAGCATTTTTAATGTGTAAGTGAAGAAAAAAGGCCACTAAGGCCAAAGATTTTTTA
CUST_24276_PI429285431	8.46e-09	3.10085	lncRNA		CUST_24280_PI429285431	CUST_24280_PI429285431	FALSE	lncRNA	lnc-CTD-2517M22.14.1-1:2		lncipedia2.1	-				chr8	145730348	145730670	-	exonic_antisense	GPT	+	2875	glutamic-pyruvate transaminase (alanine aminotransferase) (EC:2.6.1.2)	TAAAGGTAAAGGCCCTACCTGTGCTCAGGTACCCTCTCCTCCCAAGCCACCTGGCCTCCT
LNCA_19_P00317560	5.33e-07	2.07311	lncRNA	LOC646329	LNCA_19_P00319007	LNCA_19_P00319007	FALSE	lncRNA	NR_038889	NR_038889	Agilent_HUMAN_G3V2	-	LOC401320	uncharacterized LOC401320		chr7	30591725	30591784	-	intergenic					ATTAAGTTTTTAAGTGCCTGGTAATTGCTTGGTTATGACCGGTGTCTGCTCCATGGCAGC
CUST_45087_PI429285431	0.00010551	2.18958	lncRNA		CUST_45087_PI429285431	CUST_45087_PI429285431	FALSE	lncRNA	"gi|213021164|ref|NR_024451.1| Homo sapiens uncharacterized LOC100134229 (LOC100134229), non-coding RNA"		ncbi	-				Chr7	139877061	139879458	+	intergenic					AGACAATACAGCAGTGAAGAGAAGGCATGCAAAGCTGTCTTGTTGGAGTCTGGCTAAAGA
CUST_1013_PI429285431	0.000463761	0.410539	lncRNA		CUST_10130_PI429285431	CUST_10130_PI429285431	FALSE	lncRNA	lnc-SLITRK6-12:2		lncipedia2.1	-				chr13	90204359	90204688	-	intergenic					ATGACTTGAAGTACAGCACACAAGCTTCATTCCATCTCCTTTACTCCCCTTGGTCAGGAA
CUST_36308_PI429285431	3.33e-13	0.479609	lncRNA		CUST_36308_PI429285431	CUST_36308_PI429285431	FALSE	lncRNA	n344834|NULL|lincRNA|Homosapiens|HumanlincRNA|ScriptureReconstructionLincRNAsByLuo[unpublished]|linc_luo_383|NULL|-1.3305200|-0.3808684		NONCODERv3	-				chr5	87569340	87569954	-	intergenic					TTCCCAGATCTTCTTTTAATTGTCACGCTGTTCGTCCCCTCACAAAATCAAGTTTAAACT
CUST_8329_PI429285431	1.17e-08	2.43226	lncRNA		CUST_8329_PI429285431	CUST_8329_PI429285431	FALSE	lncRNA	lnc-ZNF814-2:1		lncipedia2.1	-				chr19	58368385	58370488	-	exonic_antisense	ZNF587	+	84914	zinc finger protein 587	CAGTCAGTTTTGCGAGTTTCATTGTTTTGTTGGGAACAAAAGAAAATTCTCCATAAGACA
CUST_51500_PI429285431	0.000161136	0.449762	lncRNA		CUST_51500_PI429285431	CUST_51500_PI429285431	FALSE	lncRNA	hg19_lincRNAsTranscripts_TCONS_l2_00010423 range=chr16:75259972-75262093 5'pad=0 3'pad=0 strand=+ repeatMasking=none		UCSC	-				chr16	75259972	75261223	+	intergenic					TGCCCTTGTGGGAGTTGCCAGTCCTCCTATCCTCCCAGTACAAAGCTGGCTTCCACTTCT
LNCA_21_P0000528	0.00135775	0.23232	lncRNA	C10orf108	LNCA_21_P0002225	LNCA_21_P0002225	FALSE	lncRNA			Agilent_HUMAN_G3V2	-	XLOC_001496			chr2	64518631	64518690	+	intergenic					GAGAACAGCCTAAGCCAAGGGAGGGGAGATTCTAAAAGAAATGACTGTAATTAAAGGTAG
CUST_456_PI429285431	5.8e-06	0.433079	lncRNA		CUST_45606_PI429285431	CUST_45606_PI429285431	FALSE	lncRNA_mRNA	"gi|216548548|ref|NR_024554.2| Homo sapiens Rho-related BTB domain containing 1 (RHOBTB1), transcript variant 2, non-coding RNA"		ncbi	"gi|334358908|ref|NM_001242359.1|,gi|215820661|ref|NM_014836.4|"				Chr10	62632196	62633584	-	intergenic					CTGATTATGGCCTTTAACCATGGTGGTTTGTTGTGTGTTTTTTATTTCACAAAAAGCCAA
CUST_36494_PI429285431	2.93e-09	0.421197	lncRNA		CUST_36494_PI429285431	CUST_36494_PI429285431	FALSE	lncRNA	n344995|NULL|lincRNA|Homosapiens|HumanlincRNA|ScriptureReconstructionLincRNAsByLuo[unpublished]|linc_luo_544|NULL|-1.3125200|-0.2492554		NONCODERv3	-				chr8	28913454	28916453	+	intergenic					GTAAATCATAATACTACAGAGACAAATGCACAGGTCTCCCAACCACCTCAAAGTCAATAC
LNCA_21_P0001643	2.9e-05	0.479182	lncRNA	XLOC_001263	LNCA_21_P0003704	LNCA_21_P0003704	FALSE	lncRNA			Agilent_HUMAN_G3V2	-	XLOC_003839			chr4	190198218	190198277	+	intergenic					AATCTTGTGCATGTTACAGGGAAGCACTGTCCTACATCGTATCTGACAGGCTCTCATAGT
CUST_24551_PI429285431	5.58e-07	0.462492	lncRNA		CUST_24556_PI429285431	CUST_24556_PI429285431	FALSE	lncRNA	lnc-CEP170-1:8		lncipedia2.1	-				chr1	243254692	243255176	-	intergenic					GATAAATCAGCTTTGTGAGAGCCACCTAAGCTGAAGATTCCCTTGAGAACAAGTACTGTC
CUST_15723_PI429285431	1.71e-06	0.412462	lncRNA		CUST_15725_PI429285431	CUST_15725_PI429285431	FALSE	lncRNA	lnc-COL1A1-4:2		lncipedia2.1	-				chr17	48365101	48365850	-	intergenic					TGGAAGTGTGGTGAGTGATTGACTTACATCCTTCTAGATCTTATCTACATATTTGCAAAG
CUST_18539_PI429285431	1.37e-07	0.332914	lncRNA		CUST_18539_PI429285431	CUST_18539_PI429285431	FALSE	lncRNA	lnc-HSCB-1:9		lncipedia2.1	-				chr22	28393399	28393976	+	intronic_antisense	TTC28	-	23331	tetratricopeptide repeat domain 28	TTGGTGTTCCTCTGTTTCCCAAAGTTTGAGACACTTTCAGACACTCTGCTTTGCGGTTGT
CUST_49761_PI429285431	9.82e-10	5.13334	lncRNA		CUST_49762_PI429285431	CUST_49762_PI429285431	FALSE	lncRNA	hg19_lincRNAsTranscripts_TCONS_l2_00025852 range=chr7:45838101-45843944 5'pad=0 3'pad=0 strand=+ repeatMasking=none		UCSC	-				chr7	45838101	45838316	+	intergenic					TCAAAAGATGTCTTTTTGTCACTTCCAGCTGGATCTACCATGAAAGACTTCTGAATCCAG
CUST_17781_PI429285431	0.000181544	0.421185	lncRNA		CUST_17781_PI429285431	CUST_17781_PI429285431	FALSE	lncRNA	lnc-NPAS2-1:2		lncipedia2.1	-				chr2	101363677	101364318	+	intergenic					TGCCAGCCCATTCTCTCTAATGACTGTCTCCCTCGCTGGATGTGATGAAGTAGGCTACAT
CUST_49770_PI429285431	8.1e-10	3.845	lncRNA		CUST_49772_PI429285431	CUST_49772_PI429285431	FALSE	lncRNA	hg19_lincRNAsTranscripts_TCONS_l2_00025878 range=chr7:55808105-55816936 5'pad=0 3'pad=0 strand=+ repeatMasking=none		UCSC	-				chr7	55811105	55814104	+	intergenic					ATTGTGAGTCATGAGCTTGGTCTGTGGAGGCTGACTGGAGAAAGTTCTGGGCCTGGAGAG
CUST_17191_PI429285431	1.27e-05	5.33341	lncRNA		CUST_17191_PI429285431	CUST_17191_PI429285431	FALSE	lncRNA	lnc-GPR123-2:1		lncipedia2.1	-				chr10	134827828	134828589	+	intergenic					AGAAGTGTTGAGAGACGGAGCTCGGGATCAGCTGGCATATCCACCATGTTCCAGGGTCGA
CUST_10964_PI429285431	1.07e-06	0.47548	lncRNA		CUST_10964_PI429285431	CUST_10964_PI429285431	FALSE	lncRNA	lnc-TNFRSF19-1:1		lncipedia2.1	-				chr13	24090213	24090610	+	intergenic					GATTCAGATCCTGAAGTGATTTTGTTTTGGCTGTTGCCTGCTGGGAAACCAAGATAAGAG
CUST_21329_PI429285431	0.000290059	2.11071	lncRNA		CUST_21329_PI429285431	CUST_21329_PI429285431	FALSE	lncRNA	lnc-C10orf116-1:4		lncipedia2.1	-				chr10	88784298	88785535	+	exonic_sense	FAM25A	+	643161	"family with sequence similarity 25, member A"	TGAGTTTAGGACGAGAAACTGCTCCTATTTGGTGGGACCTTGGGCAAGTCAGTTTTAAGT
CUST_35_PI429285431	4.28e-07	0.473906	lncRNA		CUST_35005_PI429285431	CUST_35005_PI429285431	FALSE	lncRNA	n341935|BC050035|mRNAlikelncRNA|Homosapiens|HumanlncRNA|JounralRNA|4416|NULL|-0.5373360|-0.1172258		NONCODERv3	-				chr12	58012187	58014645	-	exonic_antisense	SLC26A10	+	65012	"solute carrier family 26, member 10"	CACCCCGCTCATGTGTCCCTATGGTTCCTAAAGAAATATAAAGGTTCTAACTCCAAAAAA
LNCA_21_P0007318	5.51e-05	0.354252	lncRNA	LOC440028	LNCA_21_P0010868	LNCA_21_P0010868	FALSE	lncRNA			Agilent_HUMAN_G3V2	-	XLOC_l2_001945			chr10	45637331	45637390	-	intergenic					AGCCTCCCCGGTTTTGCCATTTGTCATTATCATTCACTCTTAAAATGTATTCTATCTATG
CUST_3556_PI429285431	1.8e-08	3.02509	lncRNA		CUST_35573_PI429285431	CUST_35573_PI429285431	FALSE	lncRNA	n342705|AK024231|mRNAlikelncRNA|Homosapiens|HumanlncRNA|JounralRNA|5207|NULL|-0.0596390|-0.2068711		NONCODERv3	-				chr17	42023508	42026123	+	intergenic					AAATACTCCAAGCAGGAGACCAGTTACCATTTAAGTCCAACTACCCCAAGAATATCAGAC
LNCA_33_P3248252	6.64e-08	4.07563	lncRNA	LOC399744
LNCA_24_P678418	2.82e-08	3.9268	lncRNA	DICER1-AS
CUST_4560_PI429285431	2.58e-05	0.439494	lncRNA		CUST_4560_PI429285431	CUST_4560_PI429285431	FALSE	lncRNA	"transcript_id ""ENST00000414345.2"" | genecode_v17"		gencode_v17	-				chr13	23743974	23744237	-	intergenic					CCAGCCCCAATCTTGTGCTTCTCCGTTATGCCAGTCAATAAATTGCCTTTGTTGTTCAAA
LNCA_33_P3355783	5.28e-07	0.365594	lncRNA
CUST_25105_PI429285431	2.59e-06	0.385093	lncRNA		CUST_25105_PI429285431	CUST_25105_PI429285431	FALSE	lncRNA	lnc-DOCK8-4:1		lncipedia2.1	-				chr9	30758	33680	+	intergenic					TATATAAAAAGAGCATCATCAGTCCAAAGTCCAGCAGTTGTCCCTCCTGGAATCCGTTGG
CUST_27354_PI429285431	6.22e-08	0.404767	lncRNA		CUST_27354_PI429285431	CUST_27354_PI429285431	FALSE	lncRNA	n324515|NULL|mRNAlikelncRNA|Homosapiens|vegalncRNA|GENCODE|OTTHUMT00000106562|http://vega.sanger.ac.uk/Homo_sapiens/Transcript/Summary?db=core;t=OTTHUMT00000106562|-0.0294880|-0.1683405		NONCODERv3	-				chr6	41481534	41482276	+	intergenic					TTTACTCAGATTTCTGCTCAAATATCCTCACCTCCAAGGTCCTTCTCTTCCCCCCTACTT
CUST_32983_PI429285431	7.9e-05	0.475188	lncRNA		CUST_32983_PI429285431	CUST_32983_PI429285431	FALSE	lncRNA	n339663|AK026967|mRNAlikelncRNA|Homosapiens|HumanlncRNA|JounralRNA|2107|NULL|1.9235800|-0.2290705		NONCODERv3	-				chr20	34840481	34842650	+	intronic_sense	AAR2	+			TGCTCCCCTGCCCATGTTTGTATTAAATGAAACTGTTCATGAGAGCATCAGAATAAGGGG
CUST_50907_PI429285431	0.00151937	0.460066	lncRNA		CUST_50907_PI429285431	CUST_50907_PI429285431	FALSE	lncRNA	hg19_lincRNAsTranscripts_TCONS_l2_00006111 range=chr12:9546891-9559219 5'pad=0 3'pad=0 strand=- repeatMasking=none		UCSC	-				chr12	9546891	9549890	-	intergenic					CTCCTGCCCTGCCACACCAGAGTATTTTTTATTCTTTGTATCCAGTTATTTCTTGGTGTT
LNCA_21_P0011003	1.15e-06	3.77095	lncRNA	XLOC_l2_002537	LNCA_24_P303420	LNCA_24_P303420	FALSE	lncRNA	NR_026938	NR_026938	Agilent_HUMAN_G3V2	-	LOC221442	adenylate cyclase 10 (soluble) pseudogene		chr6	41107721	41107780	+	intergenic					CTTTTGACACCTGCTTGACCAGGATTTGGATAAAAGGAGAATTTCTGCAGGAAAATAACT
CUST_37223_PI429285431	3.62e-08	0.450103	lncRNA		CUST_37233_PI429285431	CUST_37233_PI429285431	FALSE	lncRNA	n345665|NULL|lincRNA|Homosapiens|HumanlincRNA|ScriptureReconstructionLincRNAsByLuo[unpublished]|linc_luo_1214|NULL|-1.3288800|-0.2497321		NONCODERv3	-				chr5	9546458	9547422	+	bidirectional	SEMA5A	-	9037	"sema domain, seven thrombospondin repeats (type 1 and type 1-like), transmembrane domain (TM) and short cytoplasmic domain, (semaphorin) 5A"	CACAGATGAGAATGAGCACAAATGTGCATAGCAAGTGCAGTTTCCTGGCCCTTAAACTGA
CUST_21637_PI429285431	2.74e-06	0.449051	lncRNA		CUST_21637_PI429285431	CUST_21637_PI429285431	FALSE	lncRNA	lnc-NNT-3:1		lncipedia2.1	-				chr5	43488146	43488585	+	intronic_antisense	C5orf34	-	375444	chromosome 5 open reading frame 34	TCCTTCTGTGAAAGAACTGCTCTCTCCTTCCTTGAATTCCTATAGCATATTAATTAATCA
CUST_19651_PI429285431	1.96e-07	0.341363	lncRNA		CUST_19651_PI429285431	CUST_19651_PI429285431	FALSE	lncRNA	lnc-ALB-1:1		lncipedia2.1	-				chr4	74183544	74184228	+	intergenic					ATAAAACCCACTTGATCCCTTCTATGTTCATCTCCTGCGCTGGATTTGATTCATTAATAT
CUST_39447_PI429285431	1.71e-09	2.42311	lncRNA		CUST_39447_PI429285431	CUST_39447_PI429285431	FALSE	lncRNA	n386856|NULL|lncRNA|Homosapiens||UCSCGeneNoncode|uc010uka.1||-0.1176710|-0.2199980		NONCODERv3	-				chr15	69096159	69099158	-	intronic_sense	ANP32A	-	8125	"acidic (leucine-rich) nuclear phosphoprotein 32 family, member A"	GACTTTACTTTCTCTTCTCTGTTATAAAATCTGCTACATTTCTTTTCCTGGGAAAGCGAA
CUST_21815_PI429285431	3.48e-08	3.27196	lncRNA		CUST_21816_PI429285431	CUST_21816_PI429285431	FALSE	lncRNA	lnc-TAS1R2-1:1		lncipedia2.1	-				chr1	18505546	18505978	-	intronic_antisense	IGSF21	+	84966	"immunoglobin superfamily, member 21"	CGCTGCCTCCCACTTTCAAACCAGAAACTCTCGAGTAGACAGAGATGCCTTGTGATCCAA
LNCA_33_P3254695	0.000512351	2.00306	lncRNA	RNU105A
CUST_9814_PI429285431	5.68e-07	2.49115	lncRNA		CUST_9814_PI429285431	CUST_9814_PI429285431	FALSE	lncRNA	lnc-ARRDC3-1:4		lncipedia2.1	-				chr5	90610149	90610447	-	intergenic					CTTTCTTGTATTTCTCTCACGTTAACAAAATTGGTTCAGCATCTACCATGGGCTACATGC
CUST_40823_PI429285431	7.83e-07	3.12718	lncRNA		CUST_40823_PI429285431	CUST_40823_PI429285431	FALSE	lncRNA	n410592|NR_037852_4|lncRNA|Homosapiens||RefGeneNoncode|NR_037852_4||1.4960400|-0.3178016		NONCODERv3	-				chr6	2828800	2830738	-	intergenic					GGAAATGGAGTTAAAAGTTCTAAAGTCCTTGCATTGTCTGGGAAGAGAATAAAGTACAAT
CUST_7802_PI429285431	4.64e-09	0.393997	lncRNA		CUST_7802_PI429285431	CUST_7802_PI429285431	FALSE	lncRNA	lnc-KIAA1147-2:8		lncipedia2.1	-				chr7	141437998	141439409	-	exonic_antisense	SSBP1	+	6742	single-stranded DNA binding protein 1	TTATTTTAATCACCAGTGTATGTTCTCCTGCTCCCTGGACAAATCCATCAGCAGCGGCAA
CUST_10093_PI429285431	2.37e-08	0.426239	lncRNA		CUST_100_PI429285431	CUST_100_PI429285431	FALSE	lncRNA	"transcript_id ""ENST00000466430.1"" | genecode_v17"		gencode_v17	-				chr1	89295	92042	-	intergenic					CATGATCCAAACTTGATAAAGGACATGAAAAAGAGCCAGCACTTAGTATGTTTTCTGAAT
CUST_37356_PI429285431	2.49e-06	5.3497	lncRNA		CUST_37378_PI429285431	CUST_37378_PI429285431	FALSE	lncRNA	n345827|NULL|lincRNA|Homosapiens|HumanlincRNA|ScriptureReconstructionLincRNAsByLuo[unpublished]|linc_luo_1376|NULL|-1.2616000|-0.3142962		NONCODERv3	-				chr13	55613911	55616910	+	intergenic					GAATTTACATTTCTGAGCCTTGCAACCCTGGAGCAAGAAATATTTGTTGTGTCTCCCCAG
LNCA_21_P0002648	7.44e-06	0.420998	lncRNA	XLOC_002010	LNCA_21_P0005519	LNCA_21_P0005519	FALSE	lncRNA			Agilent_HUMAN_G3V2	-	XLOC_006532			chr7	98283496	98283555	-	intergenic					AAGTCAAGAAATCCTCCTTCCTGCTTGTACCAGTTGGCAGTGGGTTTTCTGGCATTTGTA
CUST_36962_PI429285431	2.23e-06	2.70464	lncRNA		CUST_36962_PI429285431	CUST_36962_PI429285431	FALSE	lncRNA	n345424|NULL|lincRNA|Homosapiens|HumanlincRNA|ScriptureReconstructionLincRNAsByLuo[unpublished]|linc_luo_973|NULL|-1.6790900|-0.2753956		NONCODERv3	-				chr1	224626282	224627636	+	intergenic					TTGGGCGAGGCATTTCTTCTGTTAGAACTTTGTACACGGAATAAAATAGATCTGTTTGTG
CUST_39701_PI429285431	0.000157491	0.449617	lncRNA		CUST_39701_PI429285431	CUST_39701_PI429285431	FALSE	lncRNA	n405552|NR_002601|lncRNA|Homosapiens||RefGeneNoncode|NR_002601||4.6587100|-0.3032124		NONCODERv3	-				chr1	171106878	171109002	+	intergenic					TTCCTCTCTCCTTTCCTGAAGATATGAAAATCAGTCTTGGCCCATTTGAATTAAAGTATA
CUST_11713_PI429285431	1.82e-06	0.453501	lncRNA		CUST_11750_PI429285431	CUST_11750_PI429285431	FALSE	lncRNA	lnc-PPARGC1B-1:1		lncipedia2.1	-				chr5	149100522	149101112	+	intergenic					AATATTCTGCTGTACCTATGATCTGTGCCCATGATGCTCTGCTGTATCCATGATGCTGTG
LNCA_21_P0001613	6.56e-08	0.469717	lncRNA	XLOC_001166	LNCA_21_P0003690	LNCA_21_P0003690	FALSE	lncRNA			Agilent_HUMAN_G3V2	-	XLOC_003809			chr4	185768754	185768813	+	intergenic					AAAGGTTTAATCTTCTTTCTCCCCTAAGTATTATCTCTCCGTCTTTAAGTCCCAACAAAT
LNCA_19_P00319721	4.41e-06	0.431351	lncRNA	FLJ37201	LNCA_19_P00321917	LNCA_19_P00321917	FALSE	lncRNA	NR_003255	NR_003255	Agilent_HUMAN_G3V2	-	TSIX			chrX	73043015	73043074	+	intergenic					AAAGAACAAACCCTGAGCCCTTTTATCAGTCTCCTGGCTTTAAACTAAGCCAATGAGGAA
CUST_15668_PI429285431	2.98e-06	0.339673	lncRNA		CUST_15675_PI429285431	CUST_15675_PI429285431	FALSE	lncRNA	lnc-RP4-725G10.1.1-4:1		lncipedia2.1	-				chr7	56605742	56608741	-	intergenic					TAAGGATAAAAGAAGAGCCAGAGTGGCTGAAAAGACAGTCCTGGTCTTTGGGTTAGACAG
CUST_12273_PI429285431	1.55e-07	0.364066	lncRNA		CUST_12273_PI429285431	CUST_12273_PI429285431	FALSE	lncRNA	lnc-LYPD6-2:2		lncipedia2.1	-				chr2	150704423	150704869	+	intergenic					AGGCTAATATCCAGTTATGAGAGCATTTTCCCAAGATACTTCTCCCCTGGACCTTGTTCC
CUST_26015_PI429285431	3.92e-05	0.354265	lncRNA		CUST_26015_PI429285431	CUST_26015_PI429285431	FALSE	lncRNA	lnc-POLR2C-1:1		lncipedia2.1	-				chr16	57496469	57496766	+	exonic_sense	POLR2C	+	5432	"polymerase (RNA) II (DNA directed) polypeptide C, 33kDa (EC:2.7.7.6)"	AAACTGCCTCACCTGAGACAAGTGCCTGCTGGACAGAGCAGGAGGCCGCAGAAGACGCTC
LNCA_33_P3386467	3.51e-07	2.68209	lncRNA	RPL23AP7
CUST_5320_PI429285431	7.55e-07	0.158837	lncRNA		CUST_5320_PI429285431	CUST_5320_PI429285431	FALSE	lncRNA	"transcript_id ""ENST00000555023.1"" | genecode_v17"		gencode_v17	-				chr15	94439288	94439687	-	intergenic					TTGGTTTGGTCTCCCTCAACTCATCAATGAGCCTTTTTAAAAAGAATAATTCGGTACTTT
CUST_42416_PI429285431	5.08e-08	0.468798	lncRNA		CUST_42416_PI429285431	CUST_42416_PI429285431	FALSE	lncRNA	ENST00000384134 ncrna:snoRNA chromosome:GRCh37:9:134365873:134365958:1 gene:ENSG00000206861 gene_biotype:snoRNA transcript_biotype:snoRNA		ensembl.GRCh37.72	-				chr9	134365873	134365958	+	intronic_sense	PRRC2B	+			AGTGATGTAATTCCAATAGATCCTTCTGACCCTCCACTGTGGACTCAATAGCAGGGAGAT
CUST_38732_PI429285431	0.000267956	0.443203	lncRNA		CUST_38732_PI429285431	CUST_38732_PI429285431	FALSE	lncRNA	n384235|NULL|lncRNA|Homosapiens||UCSCGeneNoncode|uc003ccu.3||2.4046600|-0.3361145		NONCODERv3	-				chr3	24137779	24140746	-	intergenic					CCATGTTTTAATCACCTTTGGGTCTCCTTGGCTGCTCAATAAATATTTGAATGAATCAAA
CUST_14009_PI429285431	1.23e-05	0.382093	lncRNA		CUST_14009_PI429285431	CUST_14009_PI429285431	FALSE	lncRNA	lnc-NOVA1-1:1		lncipedia2.1	-				chr14	26866359	26866926	-	intergenic					GATCTCTTCTTCCCTCCCAAATCTTCTCCATTTAGCATTTTTCTATGATACAAACACTGG
CUST_5213_PI429285431	4.86e-06	0.389638	lncRNA		CUST_52139_PI429285431	CUST_52139_PI429285431	FALSE	lncRNA	hg19_lincRNAsTranscripts_TCONS_l2_00017899 range=chr22:20958200-20960593 5'pad=0 3'pad=0 strand=- repeatMasking=none		UCSC	-				chr22	20958200	20959624	-	intergenic					ATCATTCTTTAGTCTTTAAAAGTCCTCCAGCAGAAGCTGCTCCTCCCGTCACTCAGTGAT
CUST_324_PI429201921	5.9e-08	0.425429	lncRNA		CUST_32416_PI429285431	CUST_32416_PI429285431	FALSE	lncRNA	n339011|AF527735|mRNAlikelncRNA|Homosapiens|HumanlncRNA|JounralRNA|1440|NULL|-1.0730200|-0.0954005		NONCODERv3	-				chr16	819118	819477	-	intergenic					GCCTCCCGCACAACCACAGGCCCAGGCGGGCCACGGAAGACGCTGCCCGGGCCCTGCGGA
CUST_13049_PI429285431	4.11e-05	0.342576	lncRNA		CUST_13052_PI429285431	CUST_13052_PI429285431	FALSE	lncRNA	lnc-ABCD4-1:1		lncipedia2.1	-				chr14	74684283	74685342	-	intergenic					TTTATATACACACTTGTCTCCCAATAAAAGTGAGAACCACCTCCTACATATCCCTTGTGT
CUST_13897_PI429285431	8.32e-05	0.443834	lncRNA		CUST_13897_PI429285431	CUST_13897_PI429285431	FALSE	lncRNA	lnc-FAM27D1.1-4:1		lncipedia2.1	-				chr9	47209804	47210290	+	intergenic					GCCCTCCTGCATTTTGCATCAGGTAGAAAAGTCAGTTGAATGTTGGGAAGAACACAAATA
LNCA_21_P0009977	2.23e-09	0.363686	lncRNA	XLOC_013570	LNCA_21_P0014028	LNCA_21_P0014028	FALSE	lncRNA	XM_003403527	XM_003403527	Agilent_HUMAN_G3V2	-	PP12719	uncharacterized LOC100653022		chr12	58212126	58212185	-	intergenic					TTTCACCTATCCCTAGAGAAAGATGGTATGGAGCAAGGCAGGAGGAGTTAAAACCAGCTT
CUST_40101_PI429285431	2.53e-08	0.360927	lncRNA		CUST_40101_PI429285431	CUST_40101_PI429285431	FALSE	lncRNA	n407514|NR_026973|lncRNA|Homosapiens||RefGeneNoncode|NR_026973||-1.1218100|-0.3186491		NONCODERv3	-				chr6	994884	995572	-	intergenic					TACTTAGCTAAAATAGTCGTAGTTACTTTACAAATGTTTACGGCTCCCCTGGCTTGGAGA
CUST_3772_PI429285431	1.01e-07	0.387516	lncRNA		CUST_3772_PI429285431	CUST_3772_PI429285431	FALSE	lncRNA	"transcript_id ""ENST00000434189.2"" | genecode_v17"		gencode_v17	-				chr10	102936080	102937417	+	intergenic					ACTTCAAAGCCTTTCTGGAAGCAGTCTCTGCAATAACCAACCTGGGTTCTCTCCTAATGT
CUST_18780_PI429285431	1.64e-09	2.06621	lncRNA		CUST_18780_PI429285431	CUST_18780_PI429285431	FALSE	lncRNA	lnc-C7orf23-1:1		lncipedia2.1	-				chr7	86781618	86781955	-	exonic_antisense	DMTF1	+	9988	cyclin D binding myb-like transcription factor 1	CAACCAGTTTACAAATGCTTTGCTTTACTGGAGGATCGACATGTTTGACTAATTTTCAAA
LNCA_21_P0005963	7.01e-06	0.404741	lncRNA	LOC100507420	LNCA_21_P0009623	LNCA_21_P0009623	FALSE	lncRNA			Agilent_HUMAN_G3V2	-	XLOC_012769			chr18	11471228	11490473	-	intergenic					AGGAACAGCTTCTTCTCTACGCATGGCTCTGTGTGCAGTGTTCGCCTGATTCTGAAGATG
CUST_36561_PI429285431	2.91e-08	2.22424	lncRNA		CUST_36561_PI429285431	CUST_36561_PI429285431	FALSE	lncRNA	n345059|NULL|lincRNA|Homosapiens|HumanlincRNA|ScriptureReconstructionLincRNAsByLuo[unpublished]|linc_luo_608|NULL|-1.2687600|-0.2357546		NONCODERv3	-				chr9	114967941	114969071	-	intergenic					TGAGGTTATAAAGTAGCCTAGCTCAGCACCCTGGTGAGTTTGTTGCAAGTCTACCAACAT
CUST_22410_PI429285431	2.8e-09	3.2993	lncRNA		CUST_22410_PI429285431	CUST_22410_PI429285431	FALSE	lncRNA	lnc-CEP170-1:2		lncipedia2.1	-				chr1	243264688	243265461	-	intergenic					CCAAAGTATAGGACGTTGTATCATCTCATATTAATTAGTTAGTTGGCTCAAAATGAGTGC
CUST_21359_PI429285431	6.04e-06	0.433319	lncRNA		CUST_21359_PI429285431	CUST_21359_PI429285431	FALSE	lncRNA	lnc-NPHS2-1:1		lncipedia2.1	-				chr1	179517817	179520816	-	exonic_sense	NPHS2	-	7827	"nephrosis 2, idiopathic, steroid-resistant (podocin)"	TCAAATGGAAACAGTCTTCAGAATCTTCCCTTAACCATTCCTGAGCCCTTCTGTTGTCTC
CUST_9449_PI429285431	4.77e-10	0.438974	lncRNA		CUST_9449_PI429285431	CUST_9449_PI429285431	FALSE	lncRNA	lnc-AC007663.1-1:1		lncipedia2.1	-				chr22	20192175	20194357	+	intergenic					CAATGGTTTAAGTTATTTTCTGTCAGCATCAACTTATTCCCCAGCCCATATCCGCAGGCC
CUST_17187_PI429285431	6.08e-08	6.02983	lncRNA		CUST_17187_PI429285431	CUST_17187_PI429285431	FALSE	lncRNA	lnc-NUMB-1:5		lncipedia2.1	-				chr14	73930181	73930677	-	intergenic					TGGAAACACTTCTTAAACACAACCTCTAATGTTGGTGTTTTGTAAGTACTACCCCTATGA
CUST_2067_PI429285431	9.34e-07	0.422827	lncRNA		CUST_2067_PI429285431	CUST_2067_PI429285431	FALSE	lncRNA	"transcript_id ""ENST00000508881.1"" | genecode_v17"		gencode_v17	-				chr5	6795993	6796544	+	intergenic					AGGAGTAGCATCTTGTTCCGTCGGCCTCCTTGATCTAAGCCTTTGTTGTGAATTCGTTTT
CUST_40254_PI429285431	1.6e-06	2.8456	lncRNA		CUST_40254_PI429285431	CUST_40254_PI429285431	FALSE	lncRNA	n408179|NR_028322_2|lncRNA|Homosapiens||RefGeneNoncode|NR_028322_2||4.3633100|-0.0932403		NONCODERv3	-				chr1	326891	328260	+	intergenic					TAAACAGGTTTAATGACGGTCATGGCAACTTTTTGGCACAATGAAAAATATCGCCCACGA
CUST_39403_PI429285431	4.45e-07	4.1834	lncRNA		CUST_39403_PI429285431	CUST_39403_PI429285431	FALSE	lncRNA	n386588|NULL|lncRNA|Homosapiens||UCSCGeneNoncode|uc010pbi.1||1.5572800|-0.2308957		NONCODERv3	-				chr1	149397113	149399228	-	intergenic					CTGACAAAAGCCAGTGGATGTTTCTTTTGCCAAATAAAATATACCCTTGGTGCAACTGGA
LNCA_21_P0014714	3.29e-08	2.59222	lncRNA	FOXP1-IT1
LNCA_21_P0009010	1.96e-05	0.463861	lncRNA	XLOC_011880	LNCA_21_P0012434	LNCA_21_P0012434	FALSE	lncRNA			Agilent_HUMAN_G3V2	-	XLOC_l2_010113			chr3	12818163	12833678	-	intergenic					TTGAATTGGGTGATGATTACAGGAAGACACTGCAAGAAGGATCAGCCTCCCATCTTTCTG
CUST_2666_PI429285431	1.89e-06	0.477778	lncRNA		CUST_2666_PI429285431	CUST_2666_PI429285431	FALSE	lncRNA	"transcript_id ""ENST00000422023.1"" | genecode_v17"		gencode_v17	-				chr6	148338558	148339003	-	intergenic					TTCAAGTTTAATTCAAGTGCATCTACCTCTTCTCCACTGTTGACACCAGAAAACTCCCTT
CUST_48610_PI429285431	4.7e-07	0.430517	lncRNA		CUST_48612_PI429285431	CUST_48612_PI429285431	FALSE	lncRNA	hg19_lincRNAsTranscripts_TCONS_l2_00013679 range=chr2:64478430-64479573 5'pad=0 3'pad=0 strand=+ repeatMasking=none		UCSC	-				chr2	64478430	64478674	+	intergenic					TCTATAAGAAAAAGTAGGAGAAAGACTGAAGAACCCGAGAGAACAGGCCTCTGAGCCCAA
LNCA_33_P3321781	3.2e-07	2.23882	lncRNA	FLJ44342
CUST_11453_PI429285431	5.13e-10	11.2173	lncRNA		CUST_11475_PI429285431	CUST_11475_PI429285431	FALSE	lncRNA	lnc-COL1A1-4:3		lncipedia2.1	-				chr17	48359829	48362464	-	intergenic					CACTCTTGGGGCCAACAACTATTGGAAGTGTGGTGAGTGATTGACTTACATCCTTCTAGA
LNCA_33_P3308167	4.51e-08	0.384994	lncRNA	POLR2J4
CUST_24560_PI429285431	2.7e-07	0.410329	lncRNA		CUST_24561_PI429285431	CUST_24561_PI429285431	FALSE	lncRNA_mRNA	lnc-LMAN1L-1:2		lncipedia2.1	ENST00000395018				chr15	75125471	75127826	+	intergenic					AATAAAAATCCCAAATGGTGTGCCTACCTTCCCACTTCTTACTGGCTTCCAGGAGTCTTG
CUST_21410_PI429285431	1.17e-06	0.428357	lncRNA		CUST_21410_PI429285431	CUST_21410_PI429285431	FALSE	lncRNA	lnc-FAM109B-1:1		lncipedia2.1	-				chr22	42533036	42535846	+	intergenic					TGTTCCCTAAGAAGGTCTGCCCAGGACTCAGGTAATCATATGCTCATTAGAAACTCTTGG
CUST_35465_PI429285431	3.94e-06	2.89716	lncRNA		CUST_35481_PI429285431	CUST_35481_PI429285431	FALSE	lncRNA_mRNA	n342579|L07872|mRNAlikelncRNA|Homosapiens|HumanlncRNA|JounralRNA|5078|NULL|8.8381200|-0.0746992		NONCODERv3	"ENST00000342320,ENST00000504907,ENST00000507561,ENST00000355476,ENST00000348160,ENST00000361572,ENST00000342295,ENST00000345843"				chr4	26322300	26323879	+	exonic_sense	RBPJ	+	3516	recombination signal binding protein for immunoglobulin kappa J region	GTTACACAAACGCCAGCACAAATTCAACCAGTGTCACATCATCTACAGCCACAGTGGTAT
CUST_37007_PI429285431	5.6e-06	3.17232	lncRNA		CUST_37007_PI429285431	CUST_37007_PI429285431	FALSE	lncRNA	n345464|NULL|lincRNA|Homosapiens|HumanlincRNA|ScriptureReconstructionLincRNAsByLuo[unpublished]|linc_luo_1013|NULL|-1.2617700|-0.2868423		NONCODERv3	-				chr1	150540096	150541338	-	intergenic					AAGAGACACAAACAGGACTTTCTATGGCTAGGCAGAGCAGAAGTCACCAGTTAGGAAAAA
CUST_5740_PI429285431	1.17e-05	0.442908	lncRNA		CUST_5740_PI429285431	CUST_5740_PI429285431	FALSE	lncRNA	"transcript_id ""ENST00000379640.1"" | genecode_v17"		gencode_v17	-				chr17	14670900	14673897	-	intergenic					CTTAGTTTTAATACTGAATATGATGCCTCCTTCCAATTTCCCTGTAGAGCCCTTTGCATC
CUST_27809_PI429285431	1.33e-06	0.430932	lncRNA		CUST_27809_PI429285431	CUST_27809_PI429285431	FALSE	lncRNA	n325037|NULL|mRNAlikelncRNA|Homosapiens|vegalncRNA|GENCODE|OTTHUMT00000078288|http://vega.sanger.ac.uk/Homo_sapiens/Transcript/Summary?db=core;t=OTTHUMT00000078288|-0.9527970|-0.2496427		NONCODERv3	-				chr20	22328988	22330653	-	intergenic					CATCAAACAAGTTTAAGTGATAAACTGATATTTGCACTCCTGCGGCCTATCTCTGGACTA
CUST_1765_PI429285431	2.67e-05	0.395637	lncRNA		CUST_17651_PI429285431	CUST_17651_PI429285431	FALSE	lncRNA	lnc-H3F3C-3:1		lncipedia2.1	-				chr12	32112062	32112310	-	bidirectional	KIAA1551	+			CCCGCAGATAACACCCGGGCTTGCAGAGCGCTTTCATCTGCCCGACGCGGAAATCTCCTG
CUST_8205_PI429285431	2.88e-07	0.458147	lncRNA		CUST_8205_PI429285431	CUST_8205_PI429285431	FALSE	lncRNA	lnc-CTDSP2-1:2		lncipedia2.1	-				chr12	58290523	58291575	-	intergenic					CTGCTGCGTTCCCTTCATCTAAAAGCTCTAAAATTTCAAATAAAAAGGTACAATGAAAGC
CUST_47342_PI429285431	0.00152176	0.431787	lncRNA		CUST_47342_PI429285431	CUST_47342_PI429285431	FALSE	lncRNA	"gi|237681205|ref|NR_027686.1| Homo sapiens long intergenic non-protein coding RNA 176 (LINC00176), transcript variant 1, non-coding RNA"		ncbi	-				Chr20	62665697	62668696	+	intergenic					ATAGCTTCTGGGTGTCCCCCTAGCTTTCCCCTTCCAATAGGGTGTGGCTTGGAGCTCTGA
CUST_43883_PI429285431	2.32e-06	2.01927	lncRNA		CUST_43883_PI429285431	CUST_43883_PI429285431	FALSE	lncRNA	"gi|209413711|ref|NR_024205.1| Homo sapiens long intergenic non-protein coding RNA 152 (LINC00152), transcript variant 2, non-coding RNA"		ncbi	-													CCATTTGTCTGGCCAGTCTCTATGTGTCTTAATCCCTTGTCCTTCATTAAAAGCAAAACT
LNCA_19_P00330507	9.16e-10	0.496516	lncRNA	XLOC_000294	LNCA_21_P0000535	LNCA_21_P0000535	FALSE	lncRNA	NR_027346	NR_027346	Agilent_HUMAN_G3V2	-	LINC00173	long intergenic non-protein coding RNA 173		chr12	116974257	116974316	+	intergenic					TGGAGACTCCTATTCACCCTTCAGATCAATATCCCCCAAATAAACTCCCAGTCACTCTGG
LNCA_21_P0013456	1.41e-06	2.17175	lncRNA	XLOC_l2_014048	LNCA_33_P3390955	LNCA_33_P3390955	FALSE	lncRNA	NR_004422	NR_004422	Agilent_HUMAN_G3V2	-	HPVC1	human papillomavirus (type 18) E5 central sequence-like 1		chr7	54268926	54268985	-	intergenic					GGTTTCCCTCAATATCATATTAGTCCTAGAACATACCTAACAGTAAGTCCCTTAGTTAAT
CUST_13930_PI429285431	0.000341045	0.463947	lncRNA		CUST_13930_PI429285431	CUST_13930_PI429285431	FALSE	lncRNA	lnc-LCP1-1:1		lncipedia2.1	-				chr13	46695227	46695692	-	intergenic					GAGGTCGGGATTTTTATTCTCCCAGCTCCCTTCCTGCAGAATTAATAAAAACTGCCTGAG
LNCA_19_P00321221	2.33e-06	0.458375	lncRNA	XLOC_l2_011969	LNCA_19_P00323022	LNCA_19_P00323022	FALSE	lncRNA	NR_038955	NR_038955	Agilent_HUMAN_G3V2	-	LOC100506190	uncharacterized LOC100506190		chr9	132251319	132251378	+	intergenic					ATTACAATTCTTTTCTGCCGGGTCACACGCTGTCATCCACGTGTTACCTAAGAGAGCTTT
CUST_35302_PI429285431	8.01e-07	3.91121	lncRNA		CUST_35313_PI429285431	CUST_35313_PI429285431	FALSE	lncRNA	n342336|AK124353|mRNAlikelncRNA|Homosapiens|HumanlncRNA|JounralRNA|4828|NULL|-0.9734320|-0.2952568		NONCODERv3	-				chr1	185139239	185141686	+	intronic_sense	SWT1	+			CTAACATTTTAGCACCTTTCTGGCCTTTTTACTATGCTTGTTTAAGATGTTGAGACCATA
LNCA_21_P0007170	5.63e-08	0.390533	lncRNA	XLOC_009038	LNCA_21_P0010793	LNCA_21_P0010793	FALSE	lncRNA	NR_028322	NR_028322	Agilent_HUMAN_G3V2	-	LOC100132287	uncharacterized LOC100132287		chr1	325575	325634	+	intergenic					TCACAGTGGCCCATTTAGGCCCAACTCATGACTGTCAGGCCATTTCCAGGCCTAGTGCCT
CUST_21965_PI429285431	1.57e-07	0.450624	lncRNA		CUST_21965_PI429285431	CUST_21965_PI429285431	FALSE	lncRNA	lnc-FAM168A-2:1		lncipedia2.1	-				chr11	73019717	73021411	-	exonic_antisense	ARHGEF17	+	9828	Rho guanine nucleotide exchange factor (GEF) 17	TTAGTCTTTTTCAGACCTTCGCAAAGCGCACTGCCCCTTCTTAGGCCTTATACACAAAAG
CUST_36642_PI429285431	3.53e-05	0.476202	lncRNA		CUST_36642_PI429285431	CUST_36642_PI429285431	FALSE	lncRNA	n345136|NULL|lincRNA|Homosapiens|HumanlincRNA|ScriptureReconstructionLincRNAsByLuo[unpublished]|linc_luo_685|NULL|-1.3108600|-0.1095802		NONCODERv3	-				chr11	12295969	12296757	-	intergenic					CATGCCTCAGTGCTCTCCATTCCCCTTGATTTTCATTCAAACTATACAATTTCCTTTTTT
CUST_1242_PI429285431	5.16e-07	0.465385	lncRNA		CUST_12425_PI429285431	CUST_12425_PI429285431	FALSE	lncRNA	lnc-TLX1-1:2		lncipedia2.1	-				chr10	102953455	102954510	+	intergenic					ACTTCAAAGCCTTTCTGGAAGCAGTCTCTGCAATAACCAACCTGGGTTCTCTCCTAATGT
LNCA_21_P0009964	4.77e-05	0.478059	lncRNA	LOC100506053	LNCA_21_P0014020	LNCA_21_P0014020	FALSE	lncRNA	XM_003403492	XM_003403492	Agilent_HUMAN_G3V2	-	LOC100652894	uncharacterized protein LOC100652894		chr22	24530345	24530404	-	exonic_antisense	CABIN1	+	23523	calcineurin binding protein 1	ATCAACAAGGCAAAGTACTCACGTTGAAGAAATTGGTCTTGTTCCTCTCGCAGAAGAGCC
CUST_20808_PI429285431	0.0001026	2.68009	lncRNA		CUST_20808_PI429285431	CUST_20808_PI429285431	FALSE	lncRNA	lnc-TMEM144-1:2		lncipedia2.1	-				chr4	159120240	159120931	+	intergenic					GTTAAGAATGCACATTATACTGCAGTTCTTTGGGGAATGAAGCCACCCTTGACTGAGGAG
CUST_22771_PI429285431	1.21e-08	0.36112	lncRNA		CUST_22771_PI429285431	CUST_22771_PI429285431	FALSE	lncRNA	lnc-IL17B-3:1		lncipedia2.1	-				chr5	148659253	148660785	-	intronic_antisense	AFAP1L1	+	134265	actin filament associated protein 1-like 1	TACATTAGTGTTGTTTGCATCTTCATGGCCCTAAAGTTGGTTGGAGCTACCCAAGGGAGT
CUST_5416_PI429285431	4.01e-06	0.371538	lncRNA		CUST_5416_PI429285431	CUST_5416_PI429285431	FALSE	lncRNA	"transcript_id ""ENST00000576080.1"" | genecode_v17"		gencode_v17	-				chr16	4374668	4375007	-	intergenic					AACCAATGCAGTGCTGCACATCCAATCACTATTGAGTGCTTCTCCTTCGTCCGTAACGTT
CUST_10685_PI429285431	1.65e-06	2.29046	lncRNA		CUST_106_PI429285431	CUST_106_PI429285431	FALSE	lncRNA	"transcript_id ""ENST00000419160.3"" | genecode_v17"		gencode_v17	-				chr1	322672	323278	+	intergenic					ACTGTGAGTCATGGTGAATGGACATTCTCCTTACCCTTGATGTAAATTGACAGGGTTTTG
CUST_37006_PI429285431	3.25e-06	3.23064	lncRNA		CUST_37006_PI429285431	CUST_37006_PI429285431	FALSE	lncRNA	n345464|NULL|lincRNA|Homosapiens|HumanlincRNA|ScriptureReconstructionLincRNAsByLuo[unpublished]|linc_luo_1013|NULL|-1.2617700|-0.2868423		NONCODERv3	-				chr1	150537096	150540095	-	intergenic					GCAAGACAGTGTACCTTAAACAAAGACCAGGAATACTGTCATTTCCTGGACCCAGGAAAA
CUST_31895_PI429285431	1.66e-07	0.48315	lncRNA		CUST_31895_PI429285431	CUST_31895_PI429285431	FALSE	lncRNA	n338449|BC042991|mRNAlikelncRNA|Homosapiens|HumanlncRNA|JounralRNA|846|NULL|-0.9660720|-0.1657768		NONCODERv3	-				chr14	90955355	90957995	-	intergenic					TGCAGAATCACTCCTTTGTTGTTTTATGGGGGTCTTCCCTGGCATGGATGAAAATAAGCC
CUST_13028_PI429285431	4.92e-06	2.44073	lncRNA		CUST_13029_PI429285431	CUST_13029_PI429285431	FALSE	lncRNA	lnc-ARRDC3-1:10		lncipedia2.1	-				chr5	90615455	90617857	-	intergenic					CTATAAAGCAGGGCAGACAAGTTTTCAATGGTTACTGCCAATGTGTATACAGAAAGTTAG
CUST_20873_PI429285431	1.82e-05	3.45745	lncRNA		CUST_20873_PI429285431	CUST_20873_PI429285431	FALSE	lncRNA	lnc-CLEC4E-2:7		lncipedia2.1	-				chr12	8538284	8538555	-	intergenic					TCTGAGCAGCTCCTGTGTGCCAGCTGCTGGTCTACAAGATGGATGGGTCCTTGGAGATCA
CUST_6578_PI429285431	2.1e-09	4.41313	lncRNA		CUST_6578_PI429285431	CUST_6578_PI429285431	FALSE	lncRNA	"transcript_id ""ENST00000595160.1"" | genecode_v17"		gencode_v17	-				chr19	54290851	54291296	-	intergenic					AAGGCGGCGATCGCAAGTGGAAGCACTTACCCATCAGAAGAGGCTTTTAAGCAAGGAGGT
CUST_32891_PI429285431	3.5e-07	2.9143	lncRNA		CUST_32891_PI429285431	CUST_32891_PI429285431	FALSE	lncRNA	n339558|BX647619|mRNAlikelncRNA|Homosapiens|HumanlncRNA|JounralRNA|2000|NULL|-0.9904900|-0.2822413		NONCODERv3	-				chr20	3907957	3910308	-	intergenic					ATGCTGAACCTCAGGTTTCATAGACGTCTTTGTACACTAAAAATTCTGCAGCAGAATATT
CUST_28824_PI429285431	0.000524064	0.423342	lncRNA		CUST_28824_PI429285431	CUST_28824_PI429285431	FALSE	lncRNA	n326238|NULL|mRNAlikelncRNA|Homosapiens|vegalncRNA|GENCODE|OTTHUMT00000098641|http://vega.sanger.ac.uk/Homo_sapiens/Transcript/Summary?db=core;t=OTTHUMT00000098641|0.1480860|-0.1926145		NONCODERv3	-				chr1	212205859	212206334	+	intronic_antisense	INTS7	-	25896	integrator complex subunit 7	TGCCTATCTCTCCTCCCTGCTTCTTCTGTTACCTTAATTACCCATATATATATATTTTTT
LNCA_21_P0012526	5.41e-07	0.341156	lncRNA	XLOC_l2_010061	LNCA_33_P3314446	LNCA_33_P3314446	FALSE	lncRNA	NR_028506	NR_028506	Agilent_HUMAN_G3V2	-	NF1P2	neurofibromin 1 pseudogene 2		chr15	22133286	22136977	-	intergenic					ACATACCGGTCCAGCCTTAACCTTACCAGTTAAAAGTTTGAGGAATTTATGATGAGGTAA
CUST_17073_PI429285431	8.58e-06	0.459375	lncRNA		CUST_17073_PI429285431	CUST_17073_PI429285431	FALSE	lncRNA	lnc-ARSJ-1:2		lncipedia2.1	-				chr4	115285964	115286281	-	intergenic					TTTATGACTACCCTAAATTGGTTTGTGTTTGGATGGTATCTCTCCACCCTCTGACCCCTG
CUST_12311_PI429285431	3.21e-06	0.474309	lncRNA		CUST_12311_PI429285431	CUST_12311_PI429285431	FALSE	lncRNA	lnc-TLE3-1:1		lncipedia2.1	-				chr15	70316736	70317238	-	intergenic					AACTGAGATGCAGCTTATGAAATAGAGGCTGACAATGGCTCACCCACCTCCTTTGTAAGA
CUST_20213_PI429285431	0.000166722	0.47465	lncRNA		CUST_20213_PI429285431	CUST_20213_PI429285431	FALSE	lncRNA	lnc-MRPL11-1:3		lncipedia2.1	-				chr11	66247510	66248306	-	exonic_antisense	DPP3	+	10072	dipeptidyl-peptidase 3 (EC:3.4.14.4)	CAAAACCCTGCTTGGTTCACCCCCACCTCTGTTGAAGGAAAGCAACACTGTGATGGAGAG
LNCA_21_P0007902	1.16e-06	0.494485	lncRNA	XLOC_010252	LNCA_21_P0011263	LNCA_21_P0011263	FALSE	lncRNA			Agilent_HUMAN_G3V2	-	XLOC_l2_004371			chr14	35433234	35438410	-	intergenic					TATGATGTGCAGCTCACACCAGACAGCAACTTTAGGTAGGCACTTAGGGTTATCTTTCCA
CUST_2394_PI429285431	1.8e-06	0.261334	lncRNA		CUST_23974_PI429285431	CUST_23974_PI429285431	FALSE	lncRNA	lnc-FAM43A-4:1		lncipedia2.1	-				chr3	194310584	194311702	+	intronic_antisense	TMEM44	-	93109	transmembrane protein 44	ACAAATTGTGGCCTTGTTTTGGACAGAAATAAAGAGCCCAGTTTGTTAGTGATTTACTGA
LNCA_21_P0006741	1.62e-06	0.44191	lncRNA	XLOC_008762	LNCA_21_P0010342	LNCA_21_P0010342	FALSE	lncRNA			Agilent_HUMAN_G3V2	-	XLOC_014156			chr22	20188487	20188546	+	intergenic					CAATGGTTTAAGTTATTTTCTGTCAGCATCAACTTATTCCCCAGCCCATATCCGCAGGCC
LNCA_21_P0011263	5.2e-05	2.20142	lncRNA	XLOC_l2_004371	LNCA_32_P150142	LNCA_32_P150142	FALSE	lncRNA	NR_026929	NR_026929	Agilent_HUMAN_G3V2	-	DKFZp434L192	uncharacterized protein DKFZp434L192		chr7	56564630	56564689	+	intergenic					AGTCTCCCCAAAAGTGACCACATCACCAGGCTCAGTTCCAGGAAGGCTGAGAAGTGCCCA
CUST_18035_PI429285431	7.48e-06	0.479888	lncRNA		CUST_18035_PI429285431	CUST_18035_PI429285431	FALSE	lncRNA	lnc-BLID-1:19		lncipedia2.1	-				chr11	121934888	121935787	-	intergenic					AATTTTTATAAGATCAACTTTGCTTTCAGATAACCCTCCTTCCTCCACCTCACAAAAACT
CUST_31954_PI429285431	1.59e-07	2.22737	lncRNA		CUST_31954_PI429285431	CUST_31954_PI429285431	FALSE	lncRNA	n338511|AL080073|mRNAlikelncRNA|Homosapiens|HumanlncRNA|JounralRNA|908|NULL|-1.2905600|-0.4342792		NONCODERv3	-				chr1	211477891	211479803	+	intronic_sense	RCOR3	+	55758	REST corepressor 3	GGTCTTTTAATGCACAGTTTACTATCTACAAGTACTTACCTTAGCAGGCAATTGTTTTTG
CUST_32577_PI429285431	6.8e-07	0.398366	lncRNA		CUST_32577_PI429285431	CUST_32577_PI429285431	FALSE	lncRNA	n339195|BC033353|mRNAlikelncRNA|Homosapiens|HumanlncRNA|JounralRNA|1627|NULL|-0.3839150|-0.2401244		NONCODERv3	-				chr2	239928721	239931153	-	intergenic					GAAATGGAACTCTTTCTAGCACCGTGCATGGCTGACTGGAATAAAACTATACCTCCCAAA
LNCA_21_P0001561	0.000219811	0.452968	lncRNA	XLOC_000943	LNCA_21_P0003603	LNCA_21_P0003603	FALSE	lncRNA			Agilent_HUMAN_G3V2	-	XLOC_003514			chr4	38754521	38754580	+	intergenic					CTGGAAAAAGAATTCCCTATCTCCCAAGAACTCTCCCTTTCATTCTTGTAATTCCTTTTT
LNCA_21_P0010749	1.04e-06	2.49249	lncRNA	LOC100288069	LNCA_23_P116435	LNCA_23_P116435	FALSE	lncRNA	NR_028044	NR_028044	Agilent_HUMAN_G3V2	-	IGF2-AS	insulin-like growth factor 2 antisense (non-protein coding)		chr11	2169765	2169824	+	intronic_antisense	IGF2	-	3481	insulin-like growth factor 2 (somatomedin A)	TCTCCCGGCGTTTCTCCTCAGTCTCCTGTCCAATTTCTTGCTGGTGGTCAGCAGGCATAG
CUST_46241_PI429285431	0.000116533	0.284245	lncRNA		CUST_46241_PI429285431	CUST_46241_PI429285431	FALSE	lncRNA	"gi|224177471|ref|NR_026983.1| Homo sapiens basic transcription factor 3 pseudogene 11 (BTF3P11), non-coding RNA"		ncbi	-				Chr13	77502585	77503224	+	intergenic					TTAAGCTGAAGAAGCCTGGGAATAAAGTTTGAAACAAAGGTTAATAAAGCTCTTTGCCTA
CUST_16385_PI429285431	2.28e-06	2.34089	lncRNA		CUST_16385_PI429285431	CUST_16385_PI429285431	FALSE	lncRNA	lnc-SEPT7L-1:1		lncipedia2.1	-				chr10	38739326	38741191	-	intergenic					GGCCTAAATAGGCCATTGTGAGTCATGAGCTTGGTCTGTAGAGGCTGACTGGAGAAAGTT
CUST_47953_PI429285431	2.45e-09	2.42374	lncRNA		CUST_47953_PI429285431	CUST_47953_PI429285431	FALSE	lncRNA	"gi|410172539|ref|XR_171846.1| PREDICTED: Homo sapiens uncharacterized LOC100507663 (LOC100507663), misc_RNA"		ncbi	-													AATGCCCTAAGTGCTGTCTGTATTTATGTATGTAATAAGTTCATAACATGTTAAAAAATG
LNCA_21_P0000886	1.26e-06	0.483104	lncRNA	LOC100288122	LNCA_21_P0002616	LNCA_21_P0002616	FALSE	lncRNA			Agilent_HUMAN_G3V2	-	XLOC_001707			chr2	151492117	151492176	+	intergenic					AGGCTTCTCCCACAGAGCTTCTTGTACAAATTAAAACAGGGCAGTAGAAGGTTTTCAGGT
CUST_18232_PI429285431	4.52e-07	2.95054	lncRNA		CUST_18232_PI429285431	CUST_18232_PI429285431	FALSE	lncRNA	lnc-FAM72B-2:2		lncipedia2.1	-				chr1	120930521	120933520	+	intronic_antisense	FCGR1B	-	2210	"Fc fragment of IgG, high affinity Ib, receptor (CD64)"	AGCTGCAATTGAATTCCCCATGGCTGACTGTGGCGAAACATTTTAAAATAGGGCATAGAC
CUST_42308_PI429285431	0.00014918	2.58644	lncRNA		CUST_42308_PI429285431	CUST_42308_PI429285431	FALSE	lncRNA	ENST00000384176 ncrna:snoRNA chromosome:GRCh37:15:65577799:65577929:-1 gene:ENSG00000206903 gene_biotype:snoRNA transcript_biotype:snoRNA		ensembl.GRCh37.72	-				chr15	65577799	65577929	-	intronic_sense	PARP16	-	54956	"poly (ADP-ribose) polymerase family, member 16 (EC:2.4.2.30)"	TACCAGCAAAGCTGTCACCATTTAATTGGTATCAGATTCTGACTTGCACAAGTAACATTC
CUST_42766_PI429285431	3.02e-09	2.78653	lncRNA		CUST_42766_PI429285431	CUST_42766_PI429285431	FALSE	lncRNA	ENST00000363205 ncrna:snoRNA chromosome:GRCh37:8:130880836:130880962:-1 gene:ENSG00000200075 gene_biotype:snoRNA transcript_biotype:snoRNA		ensembl.GRCh37.72	-				chr8	130880836	130880962	-	intronic_sense	FAM49B	-	51571	"family with sequence similarity 49, member B"	AAGTTTTGCATAGGATACCGTAGTCACTCAGTAGTGCTGTTTTCCTGAGGAAATACAAGA
LNCA_33_P3269864	4.05e-08	0.475307	lncRNA	LOC284009
LNCA_19_P00315493	1.12e-05	2.39996	lncRNA	LOC145474	LNCA_19_P00315493	LNCA_19_P00315493	FALSE	lncRNA	NR_027046	NR_027046	Agilent_HUMAN_G3V2	-	LOC145474	uncharacterized LOC145474		chr14	71956255	71956314	+	intergenic					ATATATTCTTCAGTGTGATTTAGGTGAGTCAGGAATTTTTCCTCTGGAGACTGCCTAAAT
CUST_6398_PI429285431	6.14e-06	0.398291	lncRNA		CUST_6398_PI429285431	CUST_6398_PI429285431	FALSE	lncRNA	"transcript_id ""ENST00000600896.1"" | genecode_v17"		gencode_v17	-				chr19	23251275	23251784	-	intergenic					AGATGGCTCTCCTCGGCTGCAGAACCGCTAAGATCCAGTAGAGGATGCATAATCTCACCG
CUST_35005_PI429285431	0.00276724	0.461381	lncRNA		CUST_35009_PI429285431	CUST_35009_PI429285431	FALSE	lncRNA	n341942|BC033361|mRNAlikelncRNA|Homosapiens|HumanlncRNA|JounralRNA|4423|NULL|-1.1277600|-0.3418628		NONCODERv3	-				chr12	58488696	58490901	-	intergenic					TGAACAAGTTCCACCCACTGCCTGAGAGTCCTGCCCTGAATTTTAGACTTTGATCATAAA
CUST_16151_PI429285431	8.65e-06	0.387743	lncRNA		CUST_16151_PI429285431	CUST_16151_PI429285431	FALSE	lncRNA	lnc-IGFL1-1:1		lncipedia2.1	-				chr19	46707309	46708313	+	intergenic					AAGAGAGATACAGGGATGTTCTACAACCATAAATCTGGTCACTTCCATCCCCTGCTTAGG
CUST_47927_PI429285431	4.94e-07	3.1038	lncRNA		CUST_47927_PI429285431	CUST_47927_PI429285431	FALSE	lncRNA	"gi|410172217|ref|XR_171666.1| PREDICTED: Homo sapiens uncharacterized LOC101059921 (LOC101059921), misc_RNA"		ncbi	-													CAACTGACTTTGGAAAAAGGATTCCTCTCTAATTGGTGTTTGTAAGTGATCGAAATAAAC
LNCA_21_P0004585	0.000123749	0.480691	lncRNA	XLOC_005088	LNCA_21_P0007892	LNCA_21_P0007892	FALSE	lncRNA			Agilent_HUMAN_G3V2	-	TMEM116	transmembrane protein 116	GO:0003674(molecular_function)|GO:0005575(cellular_component)|GO:0008150(biological_process)|GO:0016020(membrane)|GO:0016021(integral to membrane)	chr12	112332643	112332702	-	intergenic					GAAAAAATTGAATAACAGATGACTATCCTCTCCCTCTGCTCTGCGAGCTGGAGTCTACCT
CUST_37589_PI429285431	0.000424813	2.89896	lncRNA		CUST_37589_PI429285431	CUST_37589_PI429285431	FALSE	lncRNA	n346066|NULL|lincRNA|Homosapiens|HumanlincRNA|ScriptureReconstructionLincRNAsByLuo[unpublished]|linc_luo_1616|NULL|-1.3031100|-0.1979903		NONCODERv3	-				chr3	131080673	131082398	+	intergenic					TCTCCTTCAGAGCTTTCATCTTTGGTTCGCTGTAGACTCTGGGACTATCAGAAGAGAACT
CUST_20366_PI429285431	1.08e-08	2.06983	lncRNA		CUST_20366_PI429285431	CUST_20366_PI429285431	FALSE	lncRNA	lnc-TIMM9-2:9		lncipedia2.1	-				chr14	58764673	58765276	-	exonic_antisense	ARID4A	+	5926	AT rich interactive domain 4A (RBP1-like)	GTGGTTACAAAGTATCCTTACAATTGAACCTACATTTGTTAATCCTGTTCAGTGTGTATG
CUST_29411_PI429285431	1.33e-06	0.48881	lncRNA		CUST_29411_PI429285431	CUST_29411_PI429285431	FALSE	lncRNA	n332776|AF041410|mRNAlikelncRNA|Homosapiens|NULL|H-invitationalv7.5|HIT000063659|http://h-invitational.jp/hinv/spsoup/transcript_view?hit_id=HIT000063659|-0.1231410|-0.2724836		NONCODERv3	-				chr19	45842440	45843008	+	intergenic					CAGTAGCGAGTATTTACTAAGTACTTTCTATTTGCGAGGCCCTGATAAAAGTACTGTCCT
LNCA_21_P0014285	7.18e-06	0.432527	lncRNA	LOC100506465
CUST_4002_PI429285431	3.06e-07	0.413891	lncRNA		CUST_40027_PI429285431	CUST_40027_PI429285431	FALSE	lncRNA_mRNA	n407201|NR_026665|lncRNA|Homosapiens||RefGeneNoncode|NR_026665||3.7703600|-0.3432788		NONCODERv3	gi|221316611|ref|NM_001779.2|				chr1	117057155	117058342	-	exonic_sense	CD58	-	965	CD58 molecule	CAAAGAACAAGCATTAGTTTTGGCTGTCATCAACTTATTATATGACTAGGTGCTTGCTTT
CUST_42289_PI429285431	3.35e-06	3.71566	lncRNA		CUST_42289_PI429285431	CUST_42289_PI429285431	FALSE	lncRNA	ENST00000516197 ncrna:snoRNA chromosome:GRCh37:4:1976363:1976487:1 gene:ENSG00000252006 gene_biotype:snoRNA transcript_biotype:snoRNA		ensembl.GRCh37.72	-				chr4	1976363	1976487	+	intronic_sense	WHSC1	+	7468	Wolf-Hirschhorn syndrome candidate 1 (EC:2.1.1.43)	GACTGGTTTGGGGGTGTCCTGTCTCAGTGGACACAGGACACCACGGTTTTCAGTACAACA
CUST_26737_PI429285431	9.27e-06	0.461809	lncRNA		CUST_26737_PI429285431	CUST_26737_PI429285431	FALSE	lncRNA	n6223|AJ251760|GNAS1-asRNA|Homosapiens|GNAS1-AS|NONCODEv2.0|n6223|NULL|1.5226800|-0.2730873		NONCODERv3	-				chr20	57416990	57419989	-	intronic_antisense	GNAS	+	2778	GNAS complex locus	TGTGTATTTCTTTACCATTGACTCTCTGAACAGCACCATTACAGCCCCGTTCCTTGGAAG
CUST_34203_PI429285431	1.04e-06	2.65732	lncRNA		CUST_34203_PI429285431	CUST_34203_PI429285431	FALSE	lncRNA	n341057|AK057093|mRNAlikelncRNA|Homosapiens|HumanlncRNA|JounralRNA|3523|NULL|-1.0125800|-0.1927159		NONCODERv3	-				chr11	67819099	67821227	+	exonic_antisense	CHKA	-	1119	choline kinase alpha (EC:2.7.1.32)	CCTGCCTGAGATTCAGGACACATCCAAGGGTGACAGCTTGAGGTTGGGTTTTTATTTTTT
CUST_20203_PI429285431	6.89e-07	0.372432	lncRNA		CUST_2020_PI429285431	CUST_2020_PI429285431	FALSE	lncRNA	"transcript_id ""ENST00000502419.1"" | genecode_v17"		gencode_v17	-				chr4	189081219	189081895	+	intergenic					GGCACTGAAGCTAATAATGTAACTTTTCTCCCTTCTTTCTTCTTTGGCATAGATTTAAAG
CUST_37245_PI429285431	1.61e-06	2.16068	lncRNA		CUST_37263_PI429285431	CUST_37263_PI429285431	FALSE	lncRNA	n345701|NULL|lincRNA|Homosapiens|HumanlincRNA|ScriptureReconstructionLincRNAsByLuo[unpublished]|linc_luo_1250|NULL|-1.2891500|-0.4690203		NONCODERv3	-				chr13	50601279	50601818	-	intergenic					GTAAGTAACTGGGGACTTACAGGAGAATTGAACAGTTGTTTCTGCTGACTCAGTAAAAAG
CUST_12003_PI429285431	8.22e-05	0.450662	lncRNA		CUST_12003_PI429285431	CUST_12003_PI429285431	FALSE	lncRNA	lnc-SHB-1:2		lncipedia2.1	-				chr9	38072038	38072671	-	intergenic					TCTAGGTATATTCAAAATAAACATCCTAGCCAGGTCAACTTCTGGGTCCTCTCTGCATGC
CUST_14452_PI429285431	1.92e-08	3.61017	lncRNA		CUST_14452_PI429285431	CUST_14452_PI429285431	FALSE	lncRNA	lnc-EGLN1-1:7		lncipedia2.1	-				chr1	231663868	231664283	-	bidirectional	TSNAX	+	7257	translin-associated factor X	GTAACTTGGCTAGAATATGGCAGTAACTACAAGGCATGTTCTGCTCTGGCACGAAGACAA
CUST_27973_PI429285431	2.68e-09	0.388804	lncRNA		CUST_27973_PI429285431	CUST_27973_PI429285431	FALSE	lncRNA	n325223|NULL|mRNAlikelncRNA|Homosapiens|vegalncRNA|GENCODE|OTTHUMT00000329514|http://vega.sanger.ac.uk/Homo_sapiens/Transcript/Summary?db=core;t=OTTHUMT00000329514|-0.9041690|-0.3401774		NONCODERv3	-				chr2	102950297	102950733	-	intronic_antisense	IL1RL1	+	9173	interleukin 1 receptor-like 1	TGAAACCAGACTTGCTGAACTTCAAAGTCAAGCTTTTCTCCCCCCAATGTCAACTAAAAA
CUST_41334_PI429285431	3.44e-07	0.32766	lncRNA		CUST_41334_PI429285431	CUST_41334_PI429285431	FALSE	lncRNA	ENST00000410659 ncrna:miRNA chromosome:GRCh37:2:66466632:66466786:-1 gene:ENSG00000222591 gene_biotype:miRNA transcript_biotype:miRNA		ensembl.GRCh37.72	-				chr2	66466632	66466786	-	intergenic					CACTGTTTTCTCTCTGCCTACTCTTAGATGCTTGGTTTAACCTTTGAGGCACCTCTTGAT
CUST_8113_PI429285431	2e-08	0.461968	lncRNA		CUST_8113_PI429285431	CUST_8113_PI429285431	FALSE	lncRNA	lnc-WDR54-1:1		lncipedia2.1	-				chr2	74613946	74614529	+	intronic_antisense	DCTN1	-	1639	"dynactin 1 (p150, glued homolog, Drosophila)"	GGAAAAGTTATTTCAAGCTTCCTTTACATTTTCAAGTCCTTACTCCCACCCAAGCCAACA
CUST_14981_PI429285431	0.000474068	0.48031	lncRNA		CUST_14984_PI429285431	CUST_14984_PI429285431	FALSE	lncRNA	lnc-CEP68-1:2		lncipedia2.1	-				chr2	65264537	65266324	+	intergenic					TTTAATAGGTCATCCATGTTTTTCTTCCCTCAGCACCTCATTTGTTTCCTTCCCAGTACT
LNCA_21_P0000682	5.49e-06	2.94854	lncRNA	LOC100527964	LNCA_21_P0002468	LNCA_21_P0002468	FALSE	lncRNA			Agilent_HUMAN_G3V2	-	XLOC_002186			chr2	84697284	84697343	-	intergenic					TAGTGCAGAAACCCTGACCCAATGGCTACCTTTGGGTAAGTGTTGGTGTCCTGTAACATA
CUST_30_PI429201921	1.1e-05	3.44243	lncRNA		CUST_30002_PI429285431	CUST_30002_PI429285431	FALSE	lncRNA_mRNA	n334388|S79616|mRNAlikelncRNA|Homosapiens|NULL|H-invitationalv7.5|HIT000216858|http://h-invitational.jp/hinv/spsoup/transcript_view?hit_id=HIT000216858|1.6507900|-0.1808494		NONCODERv3	"gi|221316611|ref|NM_001779.2|,gi|221316574|ref|NM_001144822.1|"				chr1	117064503	117064859	-	exonic_sense	CD58	-	965	CD58 molecule	TGCACTTATACCCATACCATTAGCAGTAATTACAACATGTATTGTGCTGTATATGAATGG
CUST_39392_PI429285431	4.71e-05	2.84771	lncRNA		CUST_393_PI429201921	CUST_393_PI429201921	FALSE	lncRNA	TC01004143.hg.1		Affy_HUMAN_HTA2.0	-				chr1	2499253	2508846	+	intergenic					TCAGAAACCATTTTCACTTTTCTGTCTCCTCCATGTCTGCACTGTTTGGGTTTGTACCCG
CUST_16357_PI429285431	5.53e-06	3.13558	lncRNA		CUST_16357_PI429285431	CUST_16357_PI429285431	FALSE	lncRNA	lnc-FANCI-2:7		lncipedia2.1	-				chr15	89941259	89944258	+	intergenic					CTACAATCACTTCAAATTGGCTGTGGGGCCAGTGGACTGGGAAGGAAAAAAGCAATAAGA
CUST_30078_PI429285431	5.43e-07	3.00178	lncRNA		CUST_30084_PI429285431	CUST_30084_PI429285431	FALSE	lncRNA	n334610|U83111|mRNAlikelncRNA|Homosapiens|NULL|H-invitationalv7.5|HIT000221810_03|http://h-invitational.jp/hinv/spsoup/transcript_view?hit_id=HIT000221810_03|-1.2663800|-1.0000000		NONCODERv3	-				chr4	190906026	190906317	-	intergenic					TCGCTGTGCGTCTGCTCCTCCTTCTCGCGCTTCTCCTGCCGCCCTAATCCTGCCTTGGCC
CUST_50659_PI429285431	1.59e-08	3.49731	lncRNA		CUST_50659_PI429285431	CUST_50659_PI429285431	FALSE	lncRNA	hg19_lincRNAsTranscripts_TCONS_l2_00003950 range=chr10:38742266-38764837 5'pad=0 3'pad=0 strand=+ repeatMasking=none		UCSC	-				chr10	38742266	38743128	+	intergenic					TAAAGAAGAATCTGAAGTGAAATGATATCAAGAGACCTATCAAGACCTGTATCCAGGAAA
CUST_32583_PI429285431	0.000117359	0.441177	lncRNA		CUST_32583_PI429285431	CUST_32583_PI429285431	FALSE	lncRNA	n339202|BC048130|mRNAlikelncRNA|Homosapiens|HumanlncRNA|JounralRNA|1634|NULL|-1.0359700|-0.2499881		NONCODERv3	-				chr16	47883224	47884565	-	intergenic					GCTTTCTGTCCTTCTCTCCTTTTAGATTGTAAGCTACCCAAAGTCCATCTCCATGGGTTT
CUST_20803_PI429285431	0.000107348	2.07704	lncRNA		CUST_20803_PI429285431	CUST_20803_PI429285431	FALSE	lncRNA	lnc-IGIP-2:1		lncipedia2.1	-				chr5	139579748	139582747	+	intronic_sense	CYSTM1	+			GTGGGTTTTTTCCATGTTACAATGCAAGAATGGAATCTGCCAGGCCTTCCTGCACATGTA
CUST_4239_PI429285431	4.92e-09	0.437488	lncRNA		CUST_4239_PI429285431	CUST_4239_PI429285431	FALSE	lncRNA	"transcript_id ""ENST00000550019.1"" | genecode_v17"		gencode_v17	-				chr12	47747537	47748076	+	intergenic					AATTCCAAATGGACACCTGTTCTCTCTCCTACCAGTGAGGAAAAGGAAACGAGATGTCCA
LNCA_21_P0010047	4.89e-07	0.375973	lncRNA	XLOC_013772	LNCA_21_P0014194	LNCA_21_P0014194	FALSE	lncRNA	XR_108790	XR_108790	Agilent_HUMAN_G3V2	-	LOC100507673	uncharacterized LOC100507673		chr7	151104024	151104083	-	intronic_sense	WDR86	-	349136	WD repeat domain 86	TTGTGTGGATCCCCAAAGAAAGCAAGGTGTTGCCAGTTCCTTTCTCCTGCAGGATTTTTT
LNCA_21_P0002117	9.15e-05	0.476272	lncRNA	XLOC_002358	LNCA_21_P0004585	LNCA_21_P0004585	FALSE	lncRNA			Agilent_HUMAN_G3V2	-	XLOC_005088			chr5	173215968	173216027	-	intergenic					TATTGATTTCCTGGCCTTCCACTTCCAAACCTTCCTTGGATGGCTAAACTCCTTCTGGAA
CUST_27825_PI429285431	4.63e-08	0.468833	lncRNA		CUST_27825_PI429285431	CUST_27825_PI429285431	FALSE	lncRNA	n325053|NULL|mRNAlikelncRNA|Homosapiens|vegalncRNA|GENCODE|OTTHUMT00000078198|http://vega.sanger.ac.uk/Homo_sapiens/Transcript/Summary?db=core;t=OTTHUMT00000078198|-1.1562100|-0.3098426		NONCODERv3	-				chr20	18716294	18718006	-	intronic_antisense	DTD1	+	92675	D-tyrosyl-tRNA deacylase 1 homolog (S. cerevisiae) (EC:6.1.1.21)	TCTTTGTCTTGAGTCTACAATTTACAAAAAGAGCACCTCCATCCTCAAAGGGCCCATGCA
CUST_46786_PI429285431	1.96e-07	2.07718	lncRNA		CUST_46786_PI429285431	CUST_46786_PI429285431	FALSE	lncRNA	"gi|299829221|ref|NR_033892.1| Homo sapiens TBC1 domain family, member 3 pseudogene 5 (TBC1D3P5), non-coding RNA"		ncbi	-				Chr17	25748031	25748113	+	intergenic					GCCTGCCTTTATACTTTACACTCATGGAAGGATAACCATCTTCATGTTGTAAAATAAATG
LNCA_21_P0014331	1.94e-07	0.459876	lncRNA	LOC100505942
LNCA_24_P665504	3.08e-07	2.46544	lncRNA	LOC729737
CUST_40906_PI429285431	1.83e-08	0.331794	lncRNA		CUST_40906_PI429285431	CUST_40906_PI429285431	FALSE	lncRNA	n410742|NR_038190_7|lncRNA|Homosapiens||RefGeneNoncode|NR_038190_7||-0.4390920|-0.3342021		NONCODERv3	-				chr6	3619425	3621097	-	intergenic					AGCCAAAGTCTAGAGTCTTTTGTTCCCTCTTCAAGTCCCTATGGCCTTTCCTTTTCCTAA
CUST_23158_PI429285431	2.07e-05	0.495789	lncRNA		CUST_23158_PI429285431	CUST_23158_PI429285431	FALSE	lncRNA	lnc-FSCN2-1:1		lncipedia2.1	-				chr17	79494083	79494443	+	intergenic					TTGCTTTTGGCTAGACTCCTGCCCTACGGGGACCCCCATGATGGCCACTCAGGAGATGGG
CUST_11561_PI429285431	1.09e-09	0.390346	lncRNA		CUST_11572_PI429285431	CUST_11572_PI429285431	FALSE	lncRNA	lnc-POTEF-1:1		lncipedia2.1	-				chr2	130691752	130692152	-	intergenic					GCTGTCCTCTCGCCTTCCTTCCTCAGCTTCGTGTGAAATAAAAGCTACTGTTTTTGGTCT
CUST_14864_PI429285431	5.29e-05	4.46964	lncRNA		CUST_14864_PI429285431	CUST_14864_PI429285431	FALSE	lncRNA	lnc-IRF2BPL-2:1		lncipedia2.1	-				chr14	77552710	77553179	-	intergenic					GATGCTGCATGATGTAAGTGGCTGGCTAAAATATCTGGCATCCTTGCAGTTTTAAGTTGC
CUST_26160_PI429285431	1.26e-06	3.16398	lncRNA		CUST_26160_PI429285431	CUST_26160_PI429285431	FALSE	lncRNA	lnc-MAGEB1-2:1		lncipedia2.1	-				chrX	30739699	30740260	+	intronic_sense	GK	+	2710	glycerol kinase (EC:2.7.1.30)	TAAGCCACAAGCTGTGATCAGCACTTTTACTAAAATGTAGTGATGCGGTTCTTAAATTTA
CUST_1442_PI429285431	7.33e-09	0.375323	lncRNA		CUST_1442_PI429285431	CUST_1442_PI429285431	FALSE	lncRNA	"transcript_id ""ENST00000490139.1"" | genecode_v17"		gencode_v17	-				chr3	112861197	112863698	-	intergenic					AGACTATTGGAAATCACAGGTGATCCTGGAACCGAGTGTCTCCCGAATGCCTTATTAGTA
CUST_24502_PI429285431	1.24e-07	3.15014	lncRNA		CUST_2450_PI429285431	CUST_2450_PI429285431	FALSE	lncRNA	"transcript_id ""ENST00000519603.1"" | genecode_v17"		gencode_v17	-				chr5	178804532	178805155	-	intergenic					GCCTCCTCCGCACGCTGCTCACCAGCCTGCTAAGTGGATGTGAATAAACAATCATGCAGG
CUST_32722_PI429285431	1.4e-05	0.499596	lncRNA		CUST_32722_PI429285431	CUST_32722_PI429285431	FALSE	lncRNA	n339351|BC036781|mRNAlikelncRNA|Homosapiens|HumanlncRNA|JounralRNA|1783|NULL|0.2002600|-0.0916397		NONCODERv3	-				chr16	90089146	90089262	-	intronic_antisense	GAS8	+	2622	growth arrest-specific 8	TGGCTTTGCCTTTCTTCCCTTTCTTTTTCGGTGCCTGGAAGAGAACAAGAGGACGCCAGC
CUST_50126_PI429285431	7.1e-06	0.345602	lncRNA		CUST_50126_PI429285431	CUST_50126_PI429285431	FALSE	lncRNA	hg19_lincRNAsTranscripts_TCONS_l2_00029481 range=chr9:98172789-98189080 5'pad=0 3'pad=0 strand=- repeatMasking=none		UCSC	-				chr9	98172789	98173601	-	intergenic					TGTCCCCCTCCAATGCTGCTTGAAATTTCATTCCATTTTCGTCCTGACTTGTTCAAAGTA
LNCA_21_P0010857	7.69e-07	2.48838	lncRNA	XLOC_l2_001853	LNCA_23_P398449	LNCA_23_P398449	FALSE	lncRNA_mRNA	NR_028291	NR_028291	Agilent_HUMAN_G3V2	"gi|618857462|ref|NM_001291703.1|,gi|618857460|ref|NM_001291702.1|"	VNN3	vanin 3	GO:0005575(cellular_component)|GO:0005886(plasma membrane)|GO:0006807(nitrogen compound metabolic process)|GO:0008150(biological_process)|GO:0017159(pantetheine hydrolase activity)|GO:0031225(anchored to membrane)	chr6	133055458	133055517	-	intergenic					ACATATCATTGTGACCCCAGAAGATGGAATCTATGGTTGGATCTTCACCAGGGAGAGCAT
CUST_38343_PI429285431	1.97e-07	0.423169	lncRNA		CUST_38343_PI429285431	CUST_38343_PI429285431	FALSE	lncRNA	n382075|NULL|lncRNA|Homosapiens||UCSCGeneNoncode|uc001vim.2||-1.0809900|-0.3239045		NONCODERv3	-				chr13	66982201	66983302	-	intronic_sense	PCDH9	-	5101	protocadherin 9	TGGAGACAATTCCTCAGTAATCATACCGAAGTTCCTGCTGCTTCTCTGCCCTTCAAAAGT
CUST_24672_PI429285431	7.64e-09	2.67369	lncRNA		CUST_24692_PI429285431	CUST_24692_PI429285431	FALSE	lncRNA	lnc-GTPBP1-2:1		lncipedia2.1	-				chr22	39144712	39145211	+	exonic_antisense	SUN2	-			CTGGGCAGGTCTTAGAGTGATGGGACAATTTTGACTGAATTTTACTGATGTTATTAAAAA
CUST_8636_PI429285431	2.53e-05	2.79167	lncRNA		CUST_8636_PI429285431	CUST_8636_PI429285431	FALSE	lncRNA	lnc-KLF14-1:1		lncipedia2.1	-				chr7	130597710	130599937	-	intergenic					GATGGAGAGTTTTGACAATTTTAAGTGCATGTTCTGTGTGTAAGAAAGAGTCATTACGTT
LNCA_21_P0012482	3.9e-07	0.354234	lncRNA	LOC100505902	LNCA_33_P3312807	LNCA_33_P3312807	FALSE	lncRNA	NR_023915	NR_023915	Agilent_HUMAN_G3V2	-	IPW	imprinted in Prader-Willi syndrome (non-protein coding)		chr15	25367496	25367555	+	intergenic					CCTTCCATCTCCCTTAATCAGGACCTTGGTATAATTTATCAGGTATTTTTTAAGGTTCTA
LNCA_23_P355776	1.7e-11	5.78744	lncRNA	LINC00266-1
CUST_20638_PI429285431	9.29e-07	0.47752	lncRNA		CUST_20638_PI429285431	CUST_20638_PI429285431	FALSE	lncRNA	lnc-MFAP4-1:1		lncipedia2.1	-				chr17	19315883	19316449	-	exonic_antisense	RNF112	+	7732	ring finger protein 112	TGTTCTAGAATAGGGCCAAAGCCACCCCCTCCTCTTGGGTCTGACTGATTAGGCCCAGTC
CUST_36269_PI429285431	1.7e-10	2.53014	lncRNA		CUST_36269_PI429285431	CUST_36269_PI429285431	FALSE	lncRNA	n344800|NULL|lincRNA|Homosapiens|HumanlincRNA|ScriptureReconstructionLincRNAsByLuo[unpublished]|linc_luo_349|NULL|-1.3734400|-0.3255858		NONCODERv3	-				chr15	52210580	52212104	+	intergenic					ATTCTACCCATATGGTGAACTCCAAGTCACAAAAGTAACAACAACAACAACAATTTCCCC
CUST_13907_PI429285431	1.68e-08	0.402091	lncRNA		CUST_13907_PI429285431	CUST_13907_PI429285431	FALSE	lncRNA	lnc-EMX2-5:7		lncipedia2.1	-				chr10	120007211	120007614	+	intergenic					ATACCTCCGTGTGCATAATGGTTGTACCTGCTCCAGGAAGGCGCTGGATCCTCCCAACTC
CUST_48680_PI429285431	1.34e-06	7.46453	lncRNA		CUST_48680_PI429285431	CUST_48680_PI429285431	FALSE	lncRNA	hg19_lincRNAsTranscripts_TCONS_l2_00013854 range=chr2:102578558-102603782 5'pad=0 3'pad=0 strand=+ repeatMasking=none		UCSC	-				chr2	102578558	102581557	+	intergenic					TTCAATGAAACAATTGCCTGGAAGCTGGAAGATAATATGGAAGCTAGGGATATAATAGAG
CUST_12186_PI429285431	4.82e-06	0.486253	lncRNA		CUST_12186_PI429285431	CUST_12186_PI429285431	FALSE	lncRNA	lnc-ADD3-1:1		lncipedia2.1	-				chr10	110778428	110778795	+	intergenic					TTAGAGTTTCCTACCCAGTATGTCCCAGTGCTCAAACTATTTTTTATTATCTTCAGAGTT
CUST_44773_PI429285431	3.23e-06	2.06051	lncRNA		CUST_44773_PI429285431	CUST_44773_PI429285431	FALSE	lncRNA	"gi|374429562|ref|NR_046241.1| Homo sapiens ribosomal protein S16 pseudogene 5 (RPS16P5), non-coding RNA"		ncbi	-				Chr6	53199258	53202257	-	intergenic					GGTTTGTTGATTTGGAGATTCAGGACCACCATCTGTAGGTGGAGAGAGATCAGATGGAAA
CUST_20741_PI429285431	5.19e-10	3.21548	lncRNA		CUST_20741_PI429285431	CUST_20741_PI429285431	FALSE	lncRNA	lnc-STX6-2:1		lncipedia2.1	-				chr1	180945254	180947677	-	exonic_sense	STX6	-	10228	syntaxin 6	ATCTGAGGAGTCAAGGGAGTTTTTGTTTTGCTTTTTAGCTGAAATAACAACTTTAGTGCT
CUST_13204_PI429285431	2.34e-09	2.91574	lncRNA		CUST_13204_PI429285431	CUST_13204_PI429285431	FALSE	lncRNA	lnc-OSTF1-1:1		lncipedia2.1	-				chr9	77794469	77794824	+	intergenic					TTCACCAATCCAGTGCTCACTTATCCATGTCAGCTCTTTAAGTCATGTCTGAGATCCCTG
LNCA_21_P0000607	2.35e-09	6.77771	lncRNA	FLJ39051	LNCA_21_P0002261	LNCA_21_P0002261	FALSE	lncRNA			Agilent_HUMAN_G3V2	-	XLOC_001595			chr2	102605400	102605459	+	intergenic					CACTTCAGCAATGAAGACTGGATTTTCTCTGAAATGAACAACAAAATAAAATCTCTCCTG
CUST_29846_PI429285431	3.12e-07	0.383252	lncRNA		CUST_29846_PI429285431	CUST_29846_PI429285431	FALSE	lncRNA	n333741|L06889|mRNAlikelncRNA|Homosapiens|NULL|H-invitationalv7.5|HIT000191751|http://h-invitational.jp/hinv/spsoup/transcript_view?hit_id=HIT000191751|1.6552100|-0.4095328		NONCODERv3	-				chr7	142008412	142008745	+	intergenic					TTAAATCTTCACATCAATTCCCTGGAGCTTGGTGACTCTGCTGTGTATTTCTGTGCCAGC
CUST_10439_PI429285431	2.44e-07	2.96243	lncRNA		CUST_10439_PI429285431	CUST_10439_PI429285431	FALSE	lncRNA	lnc-ARRDC3-1:6		lncipedia2.1	-				chr5	90612897	90615137	-	intergenic					CCAACAATATTTGAAACCCTTATCTGCGTGTACAAGTTTGCTACTGGTTTTGTTTTGCTC
CUST_4061_PI429285431	6.39e-07	0.317351	lncRNA		CUST_4061_PI429285431	CUST_4061_PI429285431	FALSE	lncRNA	"transcript_id ""ENST00000529088.1"" | genecode_v17"		gencode_v17	-				chr11	97093644	97094377	-	intergenic					CCTGCATGAAATATATTAGAAGCCTTTGCTCTGGTCTTTCATGGTACTTTTAAAGGATAT
CUST_11902_PI429285431	1.5e-07	0.426236	lncRNA		CUST_11944_PI429285431	CUST_11944_PI429285431	FALSE	lncRNA	lnc-CSTB-1:5		lncipedia2.1	-				chr21	45230112	45232817	-	intergenic					CAAAGAAACTTCAAAAACAAGAAAGCGTTATAATGCACCCCGTTCCCTTCCAAAGGCCTC
CUST_19425_PI429285431	9.37e-05	0.366245	lncRNA		CUST_19425_PI429285431	CUST_19425_PI429285431	FALSE	lncRNA	lnc-SH2D7-5:3		lncipedia2.1	-				chr15	78080723	78081090	+	intergenic					GCCTGCTCCATACCCCTCCTTACCACCCCAACCCACAGCGAGACACCTGGAGTGGAGGAC
LNCA_23_P202034	0.00886816	0.248237	lncRNA	GUCY2GP
CUST_18914_PI429285431	0.000818588	2.14267	lncRNA		CUST_18914_PI429285431	CUST_18914_PI429285431	FALSE	lncRNA	lnc-IER3-5:2		lncipedia2.1	-				chr6	30798292	30800343	-	intergenic					GGAATTAAGTTTGGTGAAGTTCAAAGAAGCTGATGTTACTCACAAGAGTAAATAGAGAGG
CUST_1686_PI429285431	0.0173814	0.472114	lncRNA		CUST_16877_PI429285431	CUST_16877_PI429285431	FALSE	lncRNA	lnc-RASL10A-1:1		lncipedia2.1	-				chr22	29715298	29716522	-	intergenic					TTTGACAGTCCCTAGATCCCATGTGTTCTAGAACCTTCTCTCCCAAAGCAGAACTTTTTT
CUST_41360_PI429285431	2.26e-10	0.475222	lncRNA		CUST_41360_PI429285431	CUST_41360_PI429285431	FALSE	lncRNA	ENST00000578066 ncrna:miRNA chromosome:GRCh37:6:5148467:5148556:-1 gene:ENSG00000265083 gene_biotype:miRNA transcript_biotype:miRNA		ensembl.GRCh37.72	-				chr6	5148467	5148556	-	intronic_sense	LYRM4	-	57128	LYR motif containing 4	TCGGTACCCACTGCTGAGGGTGGGGACCAAGTCTGCGTCATCCTCTCCTCAGTGCCTCAA
CUST_9235_PI429285431	0.000374233	0.433425	lncRNA		CUST_9235_PI429285431	CUST_9235_PI429285431	FALSE	lncRNA	lnc-CTCFL-1:1		lncipedia2.1	-				chr20	56133904	56135970	-	bidirectional	PCK1	+	5105	phosphoenolpyruvate carboxykinase 1 (soluble) (EC:4.1.1.32)	CTCTCTCCCCAGAAGTTTTGTGATTTTGTTTGTTCATGTATTTTTTCCCACAATAAGGAA
CUST_22967_PI429285431	4.92e-06	0.402194	lncRNA		CUST_22967_PI429285431	CUST_22967_PI429285431	FALSE	lncRNA	lnc-DEPTOR-1:1		lncipedia2.1	-				chr8	120885090	120886992	+	exonic_sense	DEPTOR	+			TAGGTTTTCCTTTTTGCTGACAAGTCTTCCTTCACTCCCCTGAGCCTCGGTGTTTTACAT
CUST_22817_PI429285431	3.22e-09	0.46085	lncRNA		CUST_22817_PI429285431	CUST_22817_PI429285431	FALSE	lncRNA	lnc-TRAPPC2L-1:3		lncipedia2.1	-				chr16	88949923	88950500	+	intronic_antisense	CBFA2T3	-	863	"core-binding factor, runt domain, alpha subunit 2; translocated to, 3"	GCCCCACTGTTTTCTGCATTTGGCCACTGCCCACGCTTCTGGGGCTGAGGTCTCCCTCTT
CUST_12445_PI429285431	4.92e-08	0.48645	lncRNA		CUST_12445_PI429285431	CUST_12445_PI429285431	FALSE	lncRNA	lnc-QSOX2-1:10		lncipedia2.1	-				chr9	139166729	139167029	-	intergenic					AATGTGGTGGCCAAGCCAGCCTCTGCAGGTGACGGTGTCTTCAAAACCCCACCCAGGCCT
CUST_34392_PI429285431	6.09e-05	0.48444	lncRNA		CUST_343_PI429201921	CUST_343_PI429201921	FALSE	lncRNA	TC01006249.hg.1		Affy_HUMAN_HTA2.0	-				chr1	246679340	246687589	-	intergenic					TTTGACTCTGGTCCTGTCAGAACCCCTGAGTGAGACTCCCCGGATCTGTTCTCATGCCTG
LNCA_21_P0005611	1.17e-06	0.469501	lncRNA	XLOC_006625	LNCA_21_P0009216	LNCA_21_P0009216	FALSE	lncRNA			Agilent_HUMAN_G3V2	-	XLOC_012099			chr17	8086455	8086514	+	intergenic					TGTAGTCAGACTAGGCAACAATTATAAAATTCCCCGTCCGTTTTTCACCTAATGGTTTAG
CUST_25020_PI429285431	8.46e-07	3.17043	lncRNA		CUST_25020_PI429285431	CUST_25020_PI429285431	FALSE	lncRNA	lnc-SLC45A4-2:2		lncipedia2.1	-				chr8	142138166	142138648	-	bidirectional	DENND3	+	22898	DENN/MADD domain containing 3	CTCTCAGGGACACTGTGAAGACCAAACGAGAAAATAGAAACAAACATAATTTATAAACCA
LNCA_33_P3411328	8.02e-09	2.87579	lncRNA	LOC730227
CUST_11502_PI429285431	1.68e-09	0.455721	lncRNA		CUST_11527_PI429285431	CUST_11527_PI429285431	FALSE	lncRNA	lnc-SLC4A1AP-1:8		lncipedia2.1	-				chr2	27980249	27980579	+	intergenic					CCATCTCCCAGGAATTTGGATGCCTAGAACACAACAATTCTTTTAATCTTCTAAGTTAAA
CUST_24209_PI429285431	4.86e-07	0.353165	lncRNA		CUST_24221_PI429285431	CUST_24221_PI429285431	FALSE	lncRNA_mRNA	lnc-C10orf131-1:1		lncipedia2.1	"ENST00000539125,ENST00000371203,ENST00000543964,ENST00000371207"				chr10	97633189	97633775	+	exonic_sense	ENTPD1	+	953	ectonucleoside triphosphate diphosphohydrolase 1 (EC:3.6.1.5)	CTTCTGTCACTCTACTAGGGATGAAACAGCTAATCATGTTCAATAGTTACATTTAGATTG
CUST_49453_PI429285431	0.00218067	0.458802	lncRNA		CUST_49474_PI429285431	CUST_49474_PI429285431	FALSE	lncRNA	hg19_lincRNAsTranscripts_TCONS_l2_00024548 range=chr6:144662-148170 5'pad=0 3'pad=0 strand=- repeatMasking=none		UCSC	-				chr6	144662	145067	-	intergenic					AACTTGAAGATCCGTGAGGTGCCCAGAAGATCATGCAGTCATCAGTCCCACGGAGCAGCC
CUST_35416_PI429285431	9.88e-05	0.30121	lncRNA		CUST_35417_PI429285431	CUST_35417_PI429285431	FALSE	lncRNA	n342479|AK123550|mRNAlikelncRNA|Homosapiens|HumanlncRNA|JounralRNA|4973|NULL|-1.0089200|-0.1743431		NONCODERv3	-				chr2	241619860	241621604	+	exonic_antisense	AQP12B	-	653437	aquaporin 12B	TGAAAACAACGTGAAACACACAAAAGTTAAGTGTGAGCCCGTGCACTGTGACAGGTGTCA
CUST_1664_PI429285431	2.19e-08	0.449747	lncRNA		CUST_1664_PI429285431	CUST_1664_PI429285431	FALSE	lncRNA	"transcript_id ""ENST00000413586.1"" | genecode_v17"		gencode_v17	-				chr3	195563205	195563778	-	intergenic					TTCCATTTTAAATTAATACACCGGCCTTCTGGTTTGTACATCGGTTGTCCTCCCGTGGGT
CUST_1752_PI429285431	0.00329064	0.343846	lncRNA		CUST_17520_PI429285431	CUST_17520_PI429285431	FALSE	lncRNA	lnc-EIF2B5-2:3		lncipedia2.1	-				chr3	184456423	184457339	+	intergenic					GGTCTCTCAACTGAACTCAACCCTTCCTTGATTGATTGACAAGCATGTTATCTCTCATAA
CUST_2164_PI429285431	2.21e-05	0.469141	lncRNA		CUST_2164_PI429285431	CUST_2164_PI429285431	FALSE	lncRNA	"transcript_id ""ENST00000504349.1"" | genecode_v17"		gencode_v17	-				chr5	55609732	55610958	-	intergenic					CTGCCTTTGATTCTTTCTAATTGTCAGGAAACTTGCACTCATAATCCCTCCTGCCTCTGG
CUST_39206_PI429285431	2.85e-09	2.3546	lncRNA		CUST_39206_PI429285431	CUST_39206_PI429285431	FALSE	lncRNA	n385992|NULL|lncRNA|Homosapiens||UCSCGeneNoncode|uc009xrm.1||-0.6174950|-0.4460178		NONCODERv3	-				chr10	75547342	75547997	+	intronic_sense	ZSWIM8	+			AACCTTGAGTGGTAACTTTATCTTAGTCCAGGTGATTCCAGTTGCAGCAGTAGCTAGGTG
CUST_50335_PI429285431	1.26e-10	4.94523	lncRNA		CUST_50335_PI429285431	CUST_50335_PI429285431	FALSE	lncRNA	hg19_lincRNAsTranscripts_TCONS_l2_00029080 range=chr9:132264726-132275305 5'pad=0 3'pad=0 strand=+ repeatMasking=none		UCSC	-				chr9	132270726	132273725	+	intergenic					CTTTGATTCACAGTCTCATTTAATTCTCACCATTTACAGACAAGAATTCAGCTAAGATCC
CUST_14059_PI429285431	3.48e-07	0.47547	lncRNA		CUST_14059_PI429285431	CUST_14059_PI429285431	FALSE	lncRNA	lnc-NOM1-3:1		lncipedia2.1	-				chr7	156776728	156777238	+	intergenic					TTCTCTGTATTGAAAACCAAATTGTCACGGACCACTCCCATTCTCACGCAGCATTTAGGG
CUST_42996_PI429285431	1.65e-06	0.355885	lncRNA		CUST_42996_PI429285431	CUST_42996_PI429285431	FALSE	lncRNA	ENST00000391069 ncrna:snoRNA chromosome:GRCh37:14:77932627:77932779:1 gene:ENSG00000212371 gene_biotype:snoRNA transcript_biotype:snoRNA		ensembl.GRCh37.72	-				chr14	77932627	77932779	+	intronic_sense	AHSA1	+	10598	"AHA1, activator of heat shock 90kDa protein ATPase homolog 1 (yeast)"	TACTCTGTAGCACAGAAGAATTCCTGGCTTCTTTGTGTTGCACAGCTGACTTGTGCCATT
CUST_8053_PI429285431	5.04e-07	0.471157	lncRNA		CUST_8098_PI429285431	CUST_8098_PI429285431	FALSE	lncRNA	lnc-CPM-2:1		lncipedia2.1	-				chr12	69080714	69082629	-	exonic_antisense	NUP107	+	57122	nucleoporin 107kDa	TTAGAGAAAACAGCAAAACAGTGCTCTCCCAAGGGCCCTAATAAATCACTTTACGCCCAC
CUST_35188_PI429285431	8.81e-10	2.74587	lncRNA		CUST_35216_PI429285431	CUST_35216_PI429285431	FALSE	lncRNA_mRNA	n342202|CR623081|mRNAlikelncRNA|Homosapiens|HumanlncRNA|JounralRNA|4692|NULL|1.3981100|-0.5631097		NONCODERv3	ENST00000361453				chr1	565038	566029	+	intergenic					CCTATATCTAACAACGTAAAAATAAAATGACAGTTTGAACACACAAAACCCACCCCATTC
CUST_32023_PI429285431	2.93e-08	0.249486	lncRNA		CUST_32023_PI429285431	CUST_32023_PI429285431	FALSE	lncRNA	n338588|AF091526|mRNAlikelncRNA|Homosapiens|HumanlncRNA|JounralRNA|994|NULL|-1.1063900|-0.3107274		NONCODERv3	-				chr13	20768550	20770142	+	intergenic					ATTTCTTAATATTTCAAGTGACTGCTTGCCAACTGCCTGATGGAATGGCACCGTGAATTC
CUST_13384_PI429285431	7.28e-07	0.4835	lncRNA		CUST_13384_PI429285431	CUST_13384_PI429285431	FALSE	lncRNA	lnc-UQCRFS1-9:14		lncipedia2.1	-				chr19	28284440	28285919	-	intergenic					AAATTTAATTGATTTCCAAGGGTGTCCATCGCGCTTCCTTCACTGCCTTGATCATGTCGG
CUST_14920_PI429285431	5.69e-08	0.445615	lncRNA		CUST_14961_PI429285431	CUST_14961_PI429285431	FALSE	lncRNA	lnc-ZNF673-2:1		lncipedia2.1	-				chrX	45993665	45993945	+	intergenic					AAATGTTCGGCATTTTCCCAACTACATCCACCTCCTTGGCACATTAAAATGAGTGTTGTA
CUST_10466_PI429285431	0.000201354	0.498009	lncRNA		CUST_10466_PI429285431	CUST_10466_PI429285431	FALSE	lncRNA	lnc-KCNJ4-1:2		lncipedia2.1	-				chr22	38815793	38816441	-	intergenic					CAGCTCTCTGCCAGCCTCCCCGTGGGACATGTTATAAACATCAGAGTTGGATGGGCCTTG
CUST_36609_PI429285431	4.78e-06	2.19719	lncRNA		CUST_36609_PI429285431	CUST_36609_PI429285431	FALSE	lncRNA	n345105|NULL|lincRNA|Homosapiens|HumanlincRNA|ScriptureReconstructionLincRNAsByLuo[unpublished]|linc_luo_654|NULL|-1.4962500|-0.3575254		NONCODERv3	-				chr10	1095955	1097143	-	intergenic					TGTGTGAAGCCAGACATGAAAGAGATCTGTCAACACATAAAACAAAATCAAAGTCTGTTT
LNCA_21_P0009371	4.94e-06	0.481291	lncRNA	XLOC_012594	LNCA_21_P0013066	LNCA_21_P0013066	FALSE	lncRNA_mRNA			Agilent_HUMAN_G3V2	gi|542133089|ref|NM_001282492.1|	XLOC_l2_012911			chr6	24797619	24797678	-	intergenic					CAGAGGTGCTGTATTTCCTAATTGGTTTTCATAGGAATTAGTTTCTCTAAATCCAGTTAC
CUST_29457_PI429285431	3.53e-07	0.495132	lncRNA		CUST_29457_PI429285431	CUST_29457_PI429285431	FALSE	lncRNA	n332861|AF081275|mRNAlikelncRNA|Homosapiens|NULL|H-invitationalv7.5|HIT000066468_02|http://h-invitational.jp/hinv/spsoup/transcript_view?hit_id=HIT000066468_02|-0.8340920|-0.3326048		NONCODERv3	-				chr6	2670919	2671187	-	intronic_sense	MYLK4	-	340156	"myosin light chain kinase family, member 4 (EC:2.7.11.1)"	CTTGGCCTGCTCTACGAGCCCAAAGAATACCACCTCCCATACACCCTGACACATGCGGAC
CUST_50326_PI429285431	4.31e-07	2.75811	lncRNA		CUST_50326_PI429285431	CUST_50326_PI429285431	FALSE	lncRNA	hg19_lincRNAsTranscripts_TCONS_l2_00029050 range=chr9:132044730-132048048 5'pad=0 3'pad=0 strand=+ repeatMasking=none		UCSC	-				chr9	132044730	132045360	+	intergenic					CAGATTCTCTCCAAACCTTTGTGAATGAATGAAGGATGACGTCACTAGAATCCATCCCTG
CUST_37748_PI429285431	3.52e-06	0.471617	lncRNA		CUST_37748_PI429285431	CUST_37748_PI429285431	FALSE	lncRNA	n346252|NULL|lincRNA|Homosapiens|HumanlincRNA|ScriptureReconstructionLincRNAsByLuo[unpublished]|linc_luo_1802|NULL|-1.2766900|-0.2398519		NONCODERv3	-				chr1	234844614	234847542	-	intergenic					ACTTACTGTGGCTTATTTTGTTCCCTCTGCCTGAAAGAGGTCTCTTCACCTGTCAAACTC
LNCA_19_P00315936	4.68e-06	0.494092	lncRNA	XLOC_l2_010239	LNCA_19_P00316286	LNCA_19_P00316286	FALSE	lncRNA	NR_038889	NR_038889	Agilent_HUMAN_G3V2	-	LOC401320	uncharacterized LOC401320		chr7	30589559	30589618	-	intergenic					TTGACTGGGGAGAATCTGGAGAGGATTTAATTAATTTGGCAAAAGGATTAGCAATTGAAT
CUST_10260_PI429285431	6.22e-06	0.446627	lncRNA		CUST_10260_PI429285431	CUST_10260_PI429285431	FALSE	lncRNA	lnc-HPCAL1-1:7		lncipedia2.1	-				chr2	10595549	10598548	+	intergenic					TGGCTACTGTATTTGACCCCTGAAACAGTTAATTTTTCTTGACATCCCTTCCTTGGTATA
CUST_30684_PI429285431	9.97e-10	0.470953	lncRNA		CUST_30691_PI429285431	CUST_30691_PI429285431	FALSE	lncRNA	n336183|X92788|mRNAlikelncRNA|Homosapiens|NULL|H-invitationalv7.5|HIT000324590|http://h-invitational.jp/hinv/spsoup/transcript_view?hit_id=HIT000324590|1.2303700|-1.0000000		NONCODERv3	-				chr14	22337289	22337614	+	intergenic					ATTGCTGTTACATTGAACAAGACAGCCAAACATTTCTCCCTGCACATCACAGAGACCCAA
CUST_12171_PI429285431	1.39e-11	0.480981	lncRNA		CUST_12171_PI429285431	CUST_12171_PI429285431	FALSE	lncRNA	lnc-C9orf170-1:2		lncipedia2.1	-				chr9	89565782	89567157	+	intergenic					ATCAACTCCATCTGTCACAAAAATTAAGGCTAAATCTCCTCTCCAGAAGCAGAGGGAGCC
CUST_31177_PI429285431	4.48e-10	0.437144	lncRNA		CUST_31177_PI429285431	CUST_31177_PI429285431	FALSE	lncRNA	n337606|Y19231|mRNAlikelncRNA|Homosapiens|NULL|H-invitationalv7.5|HIT000408393|http://h-invitational.jp/hinv/spsoup/transcript_view?hit_id=HIT000408393|-1.0186200|-0.2617883		NONCODERv3	-				chr11	94113929	94114137	-	exonic_sense	GPR83	-	10888	G protein-coupled receptor 83	TGCTTCTTGGGATGAAGCCTTTCCACACTAATATCTCCTTTCTGTTACCTCTCTCCCCCT
CUST_47909_PI429285431	0.000900129	2.89036	lncRNA		CUST_47909_PI429285431	CUST_47909_PI429285431	FALSE	lncRNA	"gi|410171966|ref|XR_171509.1| PREDICTED: Homo sapiens putative POM121-like protein 1-like (LOC101060375), misc_RNA"		ncbi	-													ATATGACTCAAGCATTCTGGCTCCGTTAACTATTACTGCTGTTACTCCCAAGTAAATTCC
CUST_41072_PI429285431	3.73e-05	0.408376	lncRNA		CUST_41072_PI429285431	CUST_41072_PI429285431	FALSE	lncRNA	ENST00000583939 ncrna:miRNA chromosome:GRCh37:HSCHR6_MHC_DBB:30574247:30574323:-1 gene:ENSG00000264822 gene_biotype:miRNA transcript_biotype:miRNA		ensembl.GRCh37.72	-				chrHSCHR6_MHC_DBB	30574247	30574323	-	intergenic					TTGTTCTCTCTCCCCTACCACCTATCTCTTCCCTGCCTTGCTGCAGGCAAAGAGAGGGTG
CUST_12040_PI429285431	2.4e-07	0.498511	lncRNA		CUST_12040_PI429285431	CUST_12040_PI429285431	FALSE	lncRNA	lnc-NUF2-2:1		lncipedia2.1	-				chr1	163394794	163395381	+	intergenic					AACTCTTCTGGATTTCTGTTGCGACTGATTACCATATAACGTCTCCTTTCCCCATAAGAT
CUST_23495_PI429285431	3.03e-07	0.423544	lncRNA		CUST_23495_PI429285431	CUST_23495_PI429285431	FALSE	lncRNA	lnc-TPSG1-1:1		lncipedia2.1	-				chr16	1257017	1257354	-	exonic_antisense	CACNA1H	+	8912	"calcium channel, voltage-dependent, T type, alpha 1H subunit"	TTTGGGTGGCAACTGGAACCTGGGACACCTGCCTCATTCAGCCTCTCTGGACTGTGAAAG
CUST_32528_PI429285431	8.28e-08	0.497016	lncRNA		CUST_32528_PI429285431	CUST_32528_PI429285431	FALSE	lncRNA	n339136|BC035740|mRNAlikelncRNA|Homosapiens|HumanlncRNA|JounralRNA|1566|NULL|-0.7019470|-0.1793282		NONCODERv3	-				chr2	217469493	217470202	+	intergenic					CTCATCCTGCATCCCCTACCTACTTGGATGAATATTAATATTTACAATAACAGAGAAAAG
LNCA_33_P3340224	6.39e-08	0.450234	lncRNA	LOC100128081
CUST_33277_PI429285431	6.11e-10	2.26388	lncRNA		CUST_33288_PI429285431	CUST_33288_PI429285431	FALSE	lncRNA	n339999|AK130834|mRNAlikelncRNA|Homosapiens|HumanlncRNA|JounralRNA|2452|NULL|-1.0235700|-0.3435078		NONCODERv3	-				chr10	26823286	26824471	+	intronic_sense	APBB1IP	+	54518	"amyloid beta (A4) precursor protein-binding, family B, member 1 interacting protein"	GGAGGATGCAAAATCCAGTTTGTTTTGCATTTATGGAACTAAATGAGAGGATGTTGAGAG
LNCA_21_P0011595	0.00151515	0.344385	lncRNA	XLOC_l2_006101	LNCA_33_P3232204	LNCA_33_P3232204	FALSE	lncRNA	XR_110259	XR_110259	Agilent_HUMAN_G3V2	-	LOC100128343	uncharacterized LOC100128343		chr14	105891919	105891978	+	intronic_sense	MTA1	+	9112	metastasis associated 1	AGCATTTAATATTCTCCAAATGTCTTTCCTCGTGTGCTACCTGGGCTCACTGCTTTCTGG
CUST_25666_PI429285431	1.73e-06	0.450323	lncRNA		CUST_25666_PI429285431	CUST_25666_PI429285431	FALSE	lncRNA	lnc-SH3BP4-4:1		lncipedia2.1	-				chr2	236415597	236416260	+	intronic_sense	AGAP1	+	116987	"ArfGAP with GTPase domain, ankyrin repeat and PH domain 1"	TCCAGATTCCAGAAATTTCTATGGAACATTTCCTGAACCATCCTCCTGGTTTCTTCCCTT
LNCA_21_P0007034	5.54e-10	0.416292	lncRNA	XLOC_008993	LNCA_21_P0010662	LNCA_21_P0010662	FALSE	lncRNA	NR_037845	NR_037845	Agilent_HUMAN_G3V2	-	LOC100506023	uncharacterized LOC100506023		chr1	173431574	173445810	-	bidirectional	PRDX6	+	9588	peroxiredoxin 6 (EC:1.11.1.7 1.11.1.15)	TTATTGCAGCAAAAATTCCCGTACCAATGTCAGTGCTAGGATGGAGTTTCACTGTGTCAC
CUST_22058_PI429285431	8.39e-05	2.311	lncRNA		CUST_22058_PI429285431	CUST_22058_PI429285431	FALSE	lncRNA	lnc-C2orf42-3:20		lncipedia2.1	-				chr2	70313256	70313819	-	bidirectional	PCBP1	+	5093	poly(rC) binding protein 1	GAATTTTCCACACTCCTTGACAGAGGTGCTTAACCCTTATCCATCAGCATTCTCAGACAG
CUST_46168_PI429285431	0.001534	0.49587	lncRNA		CUST_46168_PI429285431	CUST_46168_PI429285431	FALSE	lncRNA	"gi|217035108|ref|NR_024563.1| Homo sapiens uncharacterized LOC100130238 (LOC100130238), non-coding RNA"		ncbi	-				NW_003315937.1	52430	53324	+						AGCTTTCAGCCTGCACCCCCGTCTGGTCCCTCAGAATGACTGAGGTTTCCACTCTTTTTC
CUST_51459_PI429285431	3.95e-05	0.478406	lncRNA		CUST_51459_PI429285431	CUST_51459_PI429285431	FALSE	lncRNA	hg19_lincRNAsTranscripts_TCONS_l2_00010119 range=chr16:33121293-33123475 5'pad=0 3'pad=0 strand=- repeatMasking=none		UCSC	-				chr16	33121293	33121984	-	intergenic					CAGATTCCTCGACTAACCTGTGGTACATATTCATTCCTTCCCTGTCCTTCTTTTAAATGT
CUST_31256_PI429285431	1.14e-06	0.465923	lncRNA		CUST_31256_PI429285431	CUST_31256_PI429285431	FALSE	lncRNA	n337712|BC031952|mRNAlikelncRNA|Homosapiens|HumanlncRNA|JounralRNA|94|NULL|-1.0261700|-0.2584004		NONCODERv3	-				chr15	41199008	41199609	+	intergenic					GCTGGTCGTGAGCAGGGCACCATCCTAGGTCCTTCTTTATACTCATTTTCCTTCTCCAGC
CUST_17287_PI429285431	1.64e-07	0.471308	lncRNA		CUST_17287_PI429285431	CUST_17287_PI429285431	FALSE	lncRNA	lnc-RP11-43D2.2.1-10:2		lncipedia2.1	-				chr5	124315897	124318180	+	intergenic					ATAGGTGCCAGAAATTGTCTATTTCTCCCCTTCAAAACTTGTCCAAACCTTTGCCCCTGT
CUST_2532_PI429285431	1.01e-08	0.378004	lncRNA		CUST_2532_PI429285431	CUST_2532_PI429285431	FALSE	lncRNA	"transcript_id ""ENST00000562471.1"" | genecode_v17"		gencode_v17	-				chr6	42059976	42061997	-	intergenic					GAACCCAGTCACTTTGCTGTTTTTCTGCCCACAAGTTTCTCTAATAAATCTTATTCTATG
CUST_18256_PI429285431	7.86e-07	2.98873	lncRNA		CUST_18256_PI429285431	CUST_18256_PI429285431	FALSE	lncRNA	lnc-RP11-195B21.3.1-2:1		lncipedia2.1	-				chr9	68415089	68416313	+	intergenic					TGAAACTCTGGGGTTGACAGGAGCTCATCTAACAGGCTGGAGGTGAGTGCAGACGAGAGC
CUST_18235_PI429285431	4.48e-07	0.354089	lncRNA		CUST_18235_PI429285431	CUST_18235_PI429285431	FALSE	lncRNA	lnc-GTF2F2-2:11		lncipedia2.1	-				chr13	45952665	45953227	+	intergenic					CTTCCTAAAATAGAGCTCTCAAAACCTGGCTGTTTTCCTTCAGAGCACTGGCCTCCAATT
LNCA_21_P0011051	2.33e-08	0.424159	lncRNA	XLOC_l2_003053	LNCA_24_P583225	LNCA_24_P583225	FALSE	lncRNA_mRNA	NR_026999	NR_026999	Agilent_HUMAN_G3V2	ENST00000423687	LINC00265	long intergenic non-protein coding RNA 265		chr7	39821393	39821452	+	intergenic					GCAGTAAAGATGATTCTGAAGAATGGCATGGGATGGATCCTTTCGAATGCACTTGAGCAG
CUST_37265_PI429285431	0.000213891	0.315614	lncRNA		CUST_37279_PI429285431	CUST_37279_PI429285431	FALSE	lncRNA	n345720|NULL|lincRNA|Homosapiens|HumanlincRNA|ScriptureReconstructionLincRNAsByLuo[unpublished]|linc_luo_1269|NULL|-1.3417600|-0.1307775		NONCODERv3	-				chr10	102729267	102730330	-	intergenic					AACGCATAATTTAGTACTCCTCCACCCCTATGTATATTGCGGTTCTAAAGGTGGGAGACG
LNCA_33_P3283974	3.25e-07	0.446088	lncRNA	LOC399829
CUST_3094_PI429285431	1.66e-10	0.377279	lncRNA		CUST_30958_PI429285431	CUST_30958_PI429285431	FALSE	lncRNA_mRNA	n337079|DQ229109|mRNAlikelncRNA|Homosapiens|NULL|H-invitationalv7.5|HIT000342509|http://h-invitational.jp/hinv/spsoup/transcript_view?hit_id=HIT000342509|0.9596040|-0.2438701		NONCODERv3	"ENST00000273145,ENST00000422265,ENST00000442925"				chr3	42906337	42906571	+	exonic_sense	ACKR2	+			TACAGTGGCATCTTTTTCATTAGCTGCATGAGCCTGGACAAGTACCTGGAGATCGTTCAT
CUST_41308_PI429285431	1.68e-05	2.61399	lncRNA		CUST_41308_PI429285431	CUST_41308_PI429285431	FALSE	lncRNA	ENST00000579869 ncrna:miRNA chromosome:GRCh37:2:240008039:240008138:-1 gene:ENSG00000265416 gene_biotype:miRNA transcript_biotype:miRNA		ensembl.GRCh37.72	-				chr2	240008039	240008138	-	intronic_sense	HDAC4	-	9759	histone deacetylase 4 (EC:3.5.1.98)	AGATAGTCAGATCCGCGTGTTAGAGCAGATTCTCCTTCATGTACAGGGAGGAGACTGTAC
CUST_48149_PI429285431	1.43e-07	4.85918	lncRNA		CUST_48149_PI429285431	CUST_48149_PI429285431	FALSE	lncRNA	"gi|410169909|ref|XR_172429.1| PREDICTED: Homo sapiens uncharacterized LOC283575 (LOC283575), misc_RNA"		ncbi	-													ACCAACCACCAGAACACCATGGAGCCAATAGCATCAATGCAAGTGAAGTATATTTATCTG
LNCA_33_P3257866	4.33e-07	0.413184	lncRNA	PYY2
CUST_24235_PI429285431	6.5e-07	0.397882	lncRNA		CUST_24247_PI429285431	CUST_24247_PI429285431	FALSE	lncRNA	lnc-PAPPA-AS1-2:1		lncipedia2.1	-				chr9	118969998	118970666	-	intronic_antisense	PAPPA	+	5069	"pregnancy-associated plasma protein A, pappalysin 1 (EC:3.4.24.79)"	TGGTTTCCTGCTCTTCCCCTCTTAGAATAATAAAGGGTCTCCCCATGTATGAAAGACAAA
CUST_6129_PI429285431	1.59e-05	0.411711	lncRNA		CUST_6129_PI429285431	CUST_6129_PI429285431	FALSE	lncRNA	"transcript_id ""ENST00000584560.1"" | genecode_v17"		gencode_v17	-				chr18	24402777	24403416	-	intergenic					TCCTCCTCTGCTAAGAGTTACTGCTTTTGTGCCTCCCCAAAAAGATATAATAAAAATAAG
CUST_26581_PI429285431	4.75e-07	0.448236	lncRNA		CUST_26581_PI429285431	CUST_26581_PI429285431	FALSE	lncRNA	lnc-SLC39A11-1:14		lncipedia2.1	-				chr17	70441154	70441714	-	intergenic					TAAAGGTGCCTTAGCAAGATGAGTTATCTGGTATTTTTCCCTCTCCACCCTGGTCTTCTC
CUST_18935_PI429285431	2.13e-06	2.20037	lncRNA		CUST_18935_PI429285431	CUST_18935_PI429285431	FALSE	lncRNA	lnc-BET1L-1:4		lncipedia2.1	-				chr11	131120	132289	-	intergenic					AACTTCTGTCTACTGTCGGACTCTACAGGTCAGCCTCTGCCTCACAGTGGACCCTCCAGA
CUST_13499_PI429285431	1.37e-06	0.495414	lncRNA		CUST_13499_PI429285431	CUST_13499_PI429285431	FALSE	lncRNA	lnc-COL5A1-1:1		lncipedia2.1	-				chr9	137521194	137521792	+	intergenic					TTGAGCTTTGGGTCTAAATTCGTGCCTCATGGCTGCCTCGGCTGATGCCGACGTGGGTTA
CUST_34536_PI429285431	0.000444147	0.430735	lncRNA		CUST_34536_PI429285431	CUST_34536_PI429285431	FALSE	lncRNA	n341415|BX647732|mRNAlikelncRNA|Homosapiens|HumanlncRNA|JounralRNA|3885|NULL|-0.5537880|-0.3082556		NONCODERv3	-				chr8	10716594	10716960	-	intergenic					CCTCCATGCACCATGATTTCAATGATTGTTTCAGTGTCATTTTAAATGTTTTCTTGTGAC
CUST_19619_PI429285431	5.84e-08	0.474416	lncRNA		CUST_19619_PI429285431	CUST_19619_PI429285431	FALSE	lncRNA	lnc-PANK4-1:1		lncipedia2.1	-				chr1	2425822	2426335	-	exonic_antisense	PLCH2	+	9651	"phospholipase C, eta 2 (EC:3.1.4.11)"	AGGAGGCTCCCAGGTTGTCCAGGTCCACATGGCTCTCAGACATGCTCGTCTCTCTCCACC
CUST_19511_PI429285431	6.45e-07	2.29322	lncRNA		CUST_19511_PI429285431	CUST_19511_PI429285431	FALSE	lncRNA	lnc-MDH1B-2:1		lncipedia2.1	-				chr2	207986227	207986881	-	intronic_sense	KLF7	-	8609	Kruppel-like factor 7 (ubiquitous)	TGGATGAGAATCAGAAGTATTTATTTGGAATTGGTGTGAATTGGAGCACATGGGGAACTG
CUST_51736_PI429285431	5.7e-06	0.467058	lncRNA		CUST_51736_PI429285431	CUST_51736_PI429285431	FALSE	lncRNA	hg19_lincRNAsTranscripts_TCONS_l2_00012045 range=chr18:29281969-29306687 5'pad=0 3'pad=0 strand=- repeatMasking=none		UCSC	-				chr18	29284969	29285031	-	intergenic					CCATGTAGTTAAAATGATTTTTTCCCTGAGAGACTCCTTCCCTATTTCTCTTATGTAAGT
CUST_19565_PI429285431	3.93e-07	2.18665	lncRNA		CUST_19565_PI429285431	CUST_19565_PI429285431	FALSE	lncRNA	lnc-IDS-1:11		lncipedia2.1	-				chrX	148614417	148615322	-	intergenic					TTTGTTCTCAAGACCTTTTTCTGTTAGCATTGGGCCTGCTTCAAGATGACAGTAGCCACC
LNCA_33_P3414107	2.32e-07	3.28988	lncRNA	LOC729040
CUST_36119_PI429285431	7.05e-09	0.499553	lncRNA		CUST_36119_PI429285431	CUST_36119_PI429285431	FALSE	lncRNA	n344694|NULL|lincRNA|Homosapiens|HumanlincRNA|ScriptureReconstructionLincRNAsByLuo[unpublished]|linc_luo_243|NULL|-1.4179000|-0.3558505		NONCODERv3	-				chr6	114730052	114732834	-	intergenic					AGTCACTCACACTAAGTCTCTGGCATGCTTCTTTAAGATTTATATTCAGGTATAGGATAG
CUST_5054_PI429285431	1.37e-06	0.414058	lncRNA		CUST_50545_PI429285431	CUST_50545_PI429285431	FALSE	lncRNA_mRNA	hg19_lincRNAsTranscripts_TCONS_l2_00030412 range=chrX:154578072-154579221 5'pad=0 3'pad=0 strand=+ repeatMasking=none		UCSC	gi|296317247|ref|NM_018196.3|				chrX	154578072	154578532	+	intergenic					TCTAGTAAGGGAGACTTGTTGGAGAGGCGGGACTCTGAGTTATCTAATGTCAGACATCTA
CUST_25123_PI429285431	0.000934987	0.48447	lncRNA		CUST_25123_PI429285431	CUST_25123_PI429285431	FALSE	lncRNA	lnc-KRT80-2:1		lncipedia2.1	-				chr12	52497943	52498454	-	intergenic					CCTCTCCCTTTTAGATTCATCCTAATATTGGCATAGGAATGCCTCTTTAAAGAACTACAA
LNCA_33_P3248008	2.68e-06	0.456248	lncRNA	LOC100652807
LNCA_19_P00804740	1.06e-07	0.383418	lncRNA	FLJ39653	LNCA_21_P0000812	LNCA_21_P0000812	FALSE	lncRNA	NR_038458	NR_038458	Agilent_HUMAN_G3V2	-	LOC400604	uncharacterized LOC400604		chr17	48945609	48945668	+	bidirectional	TOB1	-	10140	"transducer of ERBB2, 1"	CCCTTCCTCTGCATTGAAATGTCATCAAAGCGTCAAATATAAATGATTTGTTCAGTTTTC
CUST_3980_PI429285431	1.32e-05	3.5099	lncRNA		CUST_39808_PI429285431	CUST_39808_PI429285431	FALSE	lncRNA	n406218|NR_003673_4|lncRNA|Homosapiens||RefGeneNoncode|NR_003673_4||-0.6468530|-0.2809098		NONCODERv3	-				chr6	3023010	3023661	-	intergenic					AGTAGGGTTACGTGAACACGGCACAGTGGTACAATGCCATCAGACTAAATTTTTTAAAAG
CUST_32922_PI429285431	6.96e-08	3.9201	lncRNA		CUST_32922_PI429285431	CUST_32922_PI429285431	FALSE	lncRNA	n339595|AK055580|mRNAlikelncRNA|Homosapiens|HumanlncRNA|JounralRNA|2039|NULL|-1.1559000|-0.3521976		NONCODERv3	-				chr20	20389470	20390911	-	intronic_sense	RALGAPA2	-	57186	"Ral GTPase activating protein, alpha subunit 2 (catalytic)"	CCATCGTATCTACCTTGTATCTATTCCATCCATTACTTGTATTGATAACACCTGACATAT
CUST_1895_PI429285431	0.000150783	0.478746	lncRNA		CUST_1895_PI429285431	CUST_1895_PI429285431	FALSE	lncRNA	"transcript_id ""ENST00000514526.1"" | genecode_v17"		gencode_v17	-				chr4	135988388	135989076	+	intergenic					CTGCACCACCCCACCCTACCTTTATCTGTAAAATAATTGCTATATTTTTATGATGCCATT
CUST_23332_PI429285431	0.00753398	2.31688	lncRNA		CUST_23332_PI429285431	CUST_23332_PI429285431	FALSE	lncRNA	lnc-KDM5A-3:1		lncipedia2.1	-				chr12	695414	695786	-	intronic_sense	NINJ2	-	4815	ninjurin 2	TGAAGGAGTCTTCTTGTCTGTCTGGAGCCAGCTGAGATGGCCCTGAGATCCACAGAGCCT
CUST_5466_PI429285431	3.53e-10	0.486633	lncRNA		CUST_5466_PI429285431	CUST_5466_PI429285431	FALSE	lncRNA	"transcript_id ""ENST00000563962.1"" | genecode_v17"		gencode_v17	-				chr16	25097654	25098419	-	intergenic					TCTGAACAGTATTTCTGAGAAGGGGATGAAGATCGTCTCCCAAGTAAATATGTTGAGTTT
CUST_3165_PI429285431	3.03e-07	0.47879	lncRNA		CUST_31659_PI429285431	CUST_31659_PI429285431	FALSE	lncRNA_mRNA	n338183|AL050064|mRNAlikelncRNA|Homosapiens|HumanlncRNA|JounralRNA|574|NULL|-0.8431260|-0.4757503		NONCODERv3	gi|754167989|ref|NM_018364.4|				chr1	114304453	114307452	-	exonic_sense	RSBN1	-	54665	round spermatid basic protein 1	GACTATTTGCGTTGTGTGGCCTTAGTTTGTTTATTGACATTAACGAGTGTTTTAAAAAGG
LNCA_21_P0003266	1.54e-05	0.429658	lncRNA	XLOC_002948	LNCA_21_P0006125	LNCA_21_P0006125	FALSE	lncRNA			Agilent_HUMAN_G3V2	-	XLOC_007279			chr9	7961166	7961225	+	intergenic					ATGGAAAAGATTAGGAGACAGAGGCCTCTGTCTCATTTCTACTTCCTCCTGCTGACTTTG
LNCA_21_P0009548	1.12e-08	0.354103	lncRNA	XLOC_012822	LNCA_21_P0013456	LNCA_21_P0013456	FALSE	lncRNA			Agilent_HUMAN_G3V2	-	XLOC_l2_014048						+						TTCCAGATGTTCCTGTGGACCCCAGTCCAGGAAACAGAGATGGAAAGGCCAGGAAGAGAC
CUST_6882_PI429285431	1.42e-11	0.322009	lncRNA		CUST_6882_PI429285431	CUST_6882_PI429285431	FALSE	lncRNA	"transcript_id ""ENST00000596595.1"" | genecode_v17"		gencode_v17	-				chr21	43442192	43445060	+	intergenic					TCTGTTTTGACTGTATGGGCTTCTTCCTTTCATTTGTTCATTTAGCAAACATGTATTGCC
CUST_30661_PI429285431	1.09e-05	0.445472	lncRNA		CUST_30665_PI429285431	CUST_30665_PI429285431	FALSE	lncRNA_mRNA	n336109|X90753|mRNAlikelncRNA|Homosapiens|NULL|H-invitationalv7.5|HIT000324414|http://h-invitational.jp/hinv/spsoup/transcript_view?hit_id=HIT000324414|0.9822840|-0.1848652		NONCODERv3	"ENST00000391724,ENST00000391723,ENST00000359272,ENST00000353758,ENST00000345937,ENST00000391725,ENST00000355524,ENST00000391726"				chr19	55396828	55397065	+	exonic_sense	FCAR	+	2204	"Fc fragment of IgA, receptor for"	TCTCTTGGCCATACTGGTTGAAAATTGGCACAGCCATACGGCACTGAACAAGGAAGCCTC
CUST_49596_PI429285431	1.1e-07	2.10524	lncRNA		CUST_49598_PI429285431	CUST_49598_PI429285431	FALSE	lncRNA	hg19_lincRNAsTranscripts_TCONS_l2_00025009 range=chr6:160131791-160134936 5'pad=0 3'pad=0 strand=- repeatMasking=none		UCSC	-				chr6	160131791	160134645	-	intergenic					TATGGAGGTCAGAGCAGCTGAGTGGTGGTTATGAGGTGGTTATGGTGATCAGAGCAATGT
CUST_44557_PI429285431	5.14e-05	3.91661	lncRNA		CUST_4455_PI429285431	CUST_4455_PI429285431	FALSE	lncRNA	"transcript_id ""ENST00000545293.1"" | genecode_v17"		gencode_v17	-				chr12	123198838	123199588	+	exonic_antisense	HCAR3	-			AGTGTCTGTGTCTCTTTCTTACTTTGCAGTGTGGAGTAGTTTTCTACCAGGACAAAGTTA
LNCA_33_P3741059	3.8e-10	2.93018	lncRNA	LOC100506459
CUST_41545_PI429285431	1.7e-07	0.352967	lncRNA		CUST_41545_PI429285431	CUST_41545_PI429285431	FALSE	lncRNA	ENST00000577717 ncrna:miRNA chromosome:GRCh37:2:75317939:75318041:1 gene:ENSG00000263909 gene_biotype:miRNA transcript_biotype:miRNA		ensembl.GRCh37.72	-				chr2	75317939	75318041	+	intronic_antisense	TACR1	-	6869	tachykinin receptor 1	GTAACTTGTGCTTATAACTCAGGACACTTCTGAACTTGGACCATACAGGTCTCCCTGCTT
LNCA_21_P0011143	5.2e-08	2.36454	lncRNA	XLOC_l2_003732	LNCA_24_P818010	LNCA_24_P818010	FALSE	lncRNA	NR_028326	NR_028326	Agilent_HUMAN_G3V2	-	LOC100133161	uncharacterized LOC100133161		chr11	127075	127134	-	intergenic					ATGTAAATGTTTTGGTAGGTAATTTATTTGGAGTGAGTTTCTGCGTCAAGCCCGAGTTTT
CUST_6883_PI429285431	8.65e-07	0.453452	lncRNA		CUST_6883_PI429285431	CUST_6883_PI429285431	FALSE	lncRNA	"transcript_id ""ENST00000420273.1"" | genecode_v17"		gencode_v17	-				chr21	44201184	44201971	-	intergenic					CTTGCTGTCCCAAATTCTTTGGCTAAACCACCAGATTTTAAATATCTGCTAGCAAAATAT
CUST_6516_PI429285431	1.13e-06	3.61479	lncRNA		CUST_6516_PI429285431	CUST_6516_PI429285431	FALSE	lncRNA	"transcript_id ""ENST00000599274.1"" | genecode_v17"		gencode_v17	-				chr19	39832413	39832585	-	bidirectional	SAMD4B	+	55095	sterile alpha motif domain containing 4B	AATGCACAGAAAGCGCTAAGGATCAAGGAGGCTGTCAATAAACGGGAGTTGTTGCTGTGA
CUST_50185_PI429285431	9.8e-09	0.331333	lncRNA		CUST_50185_PI429285431	CUST_50185_PI429285431	FALSE	lncRNA	hg19_lincRNAsTranscripts_TCONS_l2_00028699 range=chr9:35406774-35471959 5'pad=0 3'pad=0 strand=+ repeatMasking=none		UCSC	-				chr9	35406774	35408835	+	intergenic					TTATTGAGAGAAACCATCAAAGGGTAGTCAGAGTTTGATCAGTGTCTCCCAGGCCCAATC
CUST_18347_PI429285431	2.18e-08	3.81539	lncRNA		CUST_18347_PI429285431	CUST_18347_PI429285431	FALSE	lncRNA	lnc-MYO10-1:1		lncipedia2.1	-				chr5	17216508	17218888	-	exonic_antisense	BASP1	+	10409	"brain abundant, membrane attached signal protein 1"	AAGGCTGGTGTTAAGATCCCTGAGTCCACGTCATATCATAATGCATGATTATTTTATTGA
CUST_23150_PI429285431	0.000143222	0.486072	lncRNA		CUST_23150_PI429285431	CUST_23150_PI429285431	FALSE	lncRNA	lnc-KANSL3-1:1		lncipedia2.1	-				chr2	97197964	97198403	-	intergenic					AGATCATGATGCCCATCCCCCCAGCACAATTAGAAATAAAAACAACCCGGGACAGTTAAA
LNCA_21_P0004255	6.98e-05	0.406222	lncRNA	PART1	LNCA_21_P0007230	LNCA_21_P0007230	FALSE	lncRNA			Agilent_HUMAN_G3V2	-	XLOC_009195			chr11	69680412	69681838	+	intergenic					TCCCTTTGGCTGCACCCAGGAGATGTGACTTCGAACTAAGTCTCCCCAGGCTCAATGTCC
LNCA_32_P191895	4.23e-06	2.18209	lncRNA	LOC100129960
CUST_9221_PI429285431	4.99e-08	0.459703	lncRNA		CUST_9221_PI429285431	CUST_9221_PI429285431	FALSE	lncRNA	lnc-RPS24-3:5		lncipedia2.1	-				chr10	80112849	80113531	+	intergenic					CCCCGCACCCTCACCTCTTACTCTTATTAAGTTTAAAGTGCAAAAATGATGCAATTAAAA
CUST_41655_PI429285431	1.7e-07	2.23763	lncRNA		CUST_41655_PI429285431	CUST_41655_PI429285431	FALSE	lncRNA	ENST00000583125 ncrna:miRNA chromosome:GRCh37:11:46134673:46134769:-1 gene:ENSG00000263539 gene_biotype:miRNA transcript_biotype:miRNA		ensembl.GRCh37.72	-				chr11	46134673	46134769	-	intronic_sense	PHF21A	-	51317	PHD finger protein 21A	TTTTGCTTAACTTCAGATTAGAGCACTGCATGCTGGGACCTGTAGTTGATTTAAACAGTA
CUST_17831_PI429285431	0.000312915	0.436186	lncRNA		CUST_17831_PI429285431	CUST_17831_PI429285431	FALSE	lncRNA	lnc-GINS2-3:1		lncipedia2.1	-				chr16	85434472	85435150	-	intergenic					TGCCTCCTCTCACACACACAGATGCGCAAGGTCAAAGCTAGGTCTCCATTATGACCCCTT
CUST_16364_PI429285431	0.00237568	0.426346	lncRNA		CUST_16364_PI429285431	CUST_16364_PI429285431	FALSE	lncRNA	lnc-OTUD4-1:1		lncipedia2.1	-				chr4	146124644	146125365	-	intergenic					AGTCTCCCCCTGTGAAGGCTTGGGGCTGGTTGGGCAGTAAGCCTCACAGTAATCCTTAGT
LNCA_33_P3395581	1.59e-06	0.400531	lncRNA	TRIM53P
CUST_48691_PI429285431	7.18e-06	0.49815	lncRNA		CUST_48691_PI429285431	CUST_48691_PI429285431	FALSE	lncRNA	hg19_lincRNAsTranscripts_TCONS_l2_00013880 range=chr2:107107337-107124389 5'pad=0 3'pad=0 strand=+ repeatMasking=none		UCSC	-				chr2	107107337	107108912	+	intergenic					AGAAAATTTGTACATCCTCCTTTTGCACCTGAGATCCTCATTTGCCCGACATTGTAGGTG
CUST_393_PI429201921	4.95e-08	0.469233	lncRNA		CUST_39327_PI429285431	CUST_39327_PI429285431	FALSE	lncRNA	n386382|NULL|lncRNA|Homosapiens||UCSCGeneNoncode|uc010ixi.1||1.2656400|-0.2157308		NONCODERv3	-				chr5	68902925	68903997	+	intergenic					CCTCATTTCCTGCCTTATTTTATCTTTAGATTGAGTCTTTATCCACTCCTCGGATTCAGG
CUST_35799_PI429285431	0.000634245	0.45224	lncRNA		CUST_35802_PI429285431	CUST_35802_PI429285431	FALSE	lncRNA	n344479|NULL|lincRNA|Homosapiens|HumanlincRNA|ScriptureReconstructionLincRNAsByLuo[unpublished]|linc_luo_27|NULL|-1.2827600|-0.1744060		NONCODERv3	-				chr9	132094675	132097657	+	intergenic					GTGTTTAAGGCATTTCCAAAGCTCTGTTATTAAAAACACGATGCAATGAGTTTCTTTCAG
CUST_14905_PI429285431	2.45e-05	0.497488	lncRNA		CUST_14920_PI429285431	CUST_14920_PI429285431	FALSE	lncRNA	lnc-FUT8-2:14		lncipedia2.1	-				chr14	66594473	66595659	+	intergenic					TGTCTTTTGAAAGCCATATGCGATCTGTCTGCCCTGAAGTGACTACTTCATCTCCAACCA
CUST_9046_PI429285431	1.95e-08	0.494914	lncRNA		CUST_9046_PI429285431	CUST_9046_PI429285431	FALSE	lncRNA	lnc-NDST2-2:1		lncipedia2.1	-				chr10	75547343	75549614	-	exonic_antisense	ZSWIM8	+			TCTCTAAGGCAAAGGAGTGACGAAAGATTTACTTTCTGTCCACAGGATCTCCCTGTCACA
CUST_38392_PI429285431	1.74e-07	0.466987	lncRNA		CUST_38392_PI429285431	CUST_38392_PI429285431	FALSE	lncRNA	n382309|NULL|lncRNA|Homosapiens||UCSCGeneNoncode|uc001yuj.1||2.1025100|-0.0929029		NONCODERv3	-				chr15	22472918	22473269	-	intergenic					ATCAGTAGACAAGTCCAAGAACCAGTTCTCCCTGAAGCTGAGCTCTGTGACCGCCGCGGA
CUST_23653_PI429285431	6.85e-06	2.62182	lncRNA		CUST_23653_PI429285431	CUST_23653_PI429285431	FALSE	lncRNA	lnc-CTU2-6:1		lncipedia2.1	-				chr16	88753199	88754196	+	bidirectional	SNAI3	-	333929	snail homolog 3 (Drosophila)	AATTCCCAGGGGGTCAGACATGGTTATGGGAAGTTTAATAAAACCGGTGAATCACGTGAA
CUST_29228_PI429285431	5.89e-08	3.39427	lncRNA		CUST_2922_PI429285431	CUST_2922_PI429285431	FALSE	lncRNA	"transcript_id ""ENST00000454957.1"" | genecode_v17"		gencode_v17	-				chr7	124791380	124791979	-	intergenic					TACATGCCCTTCCTTGTGGTAAATGTGCAAGTCACGGCACAATAATTGAGGAAATAAATG
CUST_38181_PI429285431	8.72e-05	0.420365	lncRNA		CUST_38181_PI429285431	CUST_38181_PI429285431	FALSE	lncRNA	n381441|NULL|lncRNA|Homosapiens||UCSCGeneNoncode|uc001jca.3||1.1260000|-0.2826674		NONCODERv3	-				chr10	45645841	45646477	+	intergenic					ATTTCCTGCTTCTCCCAGGATAGTGCCTGTGATTCGATAGATACAATGTATGGGTTTTTT
LNCA_33_P3228751	3.11e-05	0.416417	lncRNA	LOC388152
CUST_4261_PI429285431	2.1e-07	0.494035	lncRNA		CUST_4261_PI429285431	CUST_4261_PI429285431	FALSE	lncRNA	"transcript_id ""ENST00000562996.1"" | genecode_v17"		gencode_v17	-				chr12	52242007	52242433	+	intergenic					ACGCAGGTTCTGGAACTTGCCAAGGTTCCAGGGGTTGAGCCCACTCCATCCTGTCCAAAG
CUST_23834_PI429285431	3.66e-08	2.99612	lncRNA		CUST_23834_PI429285431	CUST_23834_PI429285431	FALSE	lncRNA	lnc-KANK4-1:1		lncipedia2.1	-				chr1	62584553	62584981	-	intronic_antisense	INADL	+	10207	InaD-like (Drosophila)	GATCTACCTACCTACATTTTTGGTGCAAACTATTACTTTGGGGACATCTTTCTTTTTTCC
LNCA_32_P223189	5.46e-07	2.36002	lncRNA	SUMO1P3
CUST_49760_PI429285431	2.16e-08	4.26327	lncRNA		CUST_49761_PI429285431	CUST_49761_PI429285431	FALSE	lncRNA	hg19_lincRNAsTranscripts_TCONS_l2_00025850 range=chr7:45836952-45863174 5'pad=0 3'pad=0 strand=+ repeatMasking=none		UCSC	-				chr7	45836952	45839951	+	intergenic					CAGAAGGAGTCATGCTAACAGAACATTTTATTTTCTATTTTCCCAGAGCTGTAAAACATG
CUST_460_PI429285431	8.46e-10	0.449436	lncRNA		CUST_46001_PI429285431	CUST_46001_PI429285431	FALSE	lncRNA_mRNA	"gi|386869525|ref|NR_048547.1| Homo sapiens microsomal glutathione S-transferase 1 (MGST1), transcript variant 9, non-coding RNA"		ncbi	"ENST00000396207,ENST00000396209,ENST00000396210,ENST00000010404"				Chr12	16500712	16501613	+	intergenic					GTAACATTCACACAACACCTCACTTTTGAATCTATAAAAGAATTGCACGTATGAGAAACC
CUST_44582_PI429285431	5.86e-07	2.05032	lncRNA		CUST_44582_PI429285431	CUST_44582_PI429285431	FALSE	lncRNA	"gi|302699227|ref|NR_036530.1| Homo sapiens uncharacterized LOC100289230 (LOC100289230), non-coding RNA"		ncbi	-				Chr5	98264838	98266713	+	intergenic					CTGTCGTATTGTGCCATCAAACATGCTATTCGAAAAAAGATCTTGCCCAATTTGTAATAA
CUST_9183_PI429285431	1.53e-06	0.434299	lncRNA		CUST_9183_PI429285431	CUST_9183_PI429285431	FALSE	lncRNA	lnc-VAPB-1:7		lncipedia2.1	-				chr20	57148632	57149279	+	intergenic					AAGTGTACTGGCTCCTGTCCTGGATCAACTCAGAAAATGAAACACATCGGATTCTGTCCA
CUST_33428_PI429285431	6.42e-06	2.02032	lncRNA		CUST_33456_PI429285431	CUST_33456_PI429285431	FALSE	lncRNA	n340190|AL358312|mRNAlikelncRNA|Homosapiens|HumanlncRNA|JounralRNA|2651|NULL|-1.2502800|-0.3416345		NONCODERv3	-				chr4	102218140	102219134	-	intronic_sense	PPP3CA	-	5530	"protein phosphatase 3 (formerly 2B), catalytic subunit, alpha isoform (EC:3.1.3.16)"	CCCAGACAACTTGTCACGTAGCAGTCTCAATCAAAATTCATTAAAAAGAAAAGACGATTA
CUST_45442_PI429285431	5.95e-08	2.85584	lncRNA		CUST_45442_PI429285431	CUST_45442_PI429285431	FALSE	lncRNA	"gi|337299691|ref|NR_038955.1| Homo sapiens uncharacterized LOC100506190 (LOC100506190), non-coding RNA"		ncbi	-				Chr9	132250939	132253061	+	intergenic					ATGCAGGCCATCGATGGAAATGTCAGACAGTGCGAGTCCACGCCTGAACACTTCTGGGGT
LNCA_23_P123164	0.00602642	0.418742	lncRNA	OR6W1P
LNCA_19_P00802587	9.91e-05	0.480584	lncRNA	XLOC_l2_003666	LNCA_21_P0000623	LNCA_21_P0000623	FALSE	lncRNA	NR_034026	NR_034026	Agilent_HUMAN_G3V2	-	LINC00421	long intergenic non-protein coding RNA 421		chr13	19920795	19920854	+	intergenic					GGAAAGGGAACAATGAAACTTACCCATTCTCCCACTGCTCACATTTCCTTCTGGTTTTTT
CUST_4908_PI429285431	0.00386953	2.38508	lncRNA		CUST_49102_PI429285431	CUST_49102_PI429285431	FALSE	lncRNA	hg19_lincRNAsTranscripts_TCONS_l2_00020484 range=chr4:37101734-37112616 5'pad=0 3'pad=0 strand=+ repeatMasking=none		UCSC	-				chr4	37101734	37102194	+	intergenic					TCAGTATGACAGCTTCAGCTACCTACAGTCCACTTGCCAGCATAAGTCCCCACCTGCTGA
CUST_6519_PI429285431	5.59e-05	0.402373	lncRNA		CUST_6519_PI429285431	CUST_6519_PI429285431	FALSE	lncRNA	"transcript_id ""ENST00000599801.1"" | genecode_v17"		gencode_v17	-				chr19	41960443	41961153	-	intergenic					TAAAAAAGTAGAAAACACATTGATGCAGCATGTTCACCCCAACCTCCCTGCCTAAAGGCT
CUST_41873_PI429285431	2.24e-05	0.497215	lncRNA		CUST_41873_PI429285431	CUST_41873_PI429285431	FALSE	lncRNA	ENST00000408396 ncrna:miRNA chromosome:GRCh37:12:120151439:120151529:-1 gene:ENSG00000221323 gene_biotype:miRNA transcript_biotype:miRNA		ensembl.GRCh37.72	-				chr12	120151439	120151529	-	exonic_sense	CIT	-	11113	"citron (rho-interacting, serine/threonine kinase 21) (EC:2.7.11.1)"	GGGTCAGCTGAGCATGCCCTCAGGTTGCTCACTGTTCTTCCCTAGAATGTCAGGTGATGT
LNCA_33_P3328251	1.17e-06	3.94276	lncRNA	LOC100288018
CUST_35500_PI429285431	1.04e-06	0.495149	lncRNA		CUST_35535_PI429285431	CUST_35535_PI429285431	FALSE	lncRNA	n342658|BC050295|mRNAlikelncRNA|Homosapiens|HumanlncRNA|JounralRNA|5160|NULL|-1.1675100|-0.3562597		NONCODERv3	-				chr5	65267658	65268270	+	intronic_sense	ERBB2IP	+	55914	erbb2 interacting protein	GTCCTTACACTCATTGAGAACCATTGATGTTACGCAAATGCTATTAAACTTTGCATCTAA
LNCA_19_P00319147	1.35e-07	0.434944	lncRNA	IPW	LNCA_19_P00321356	LNCA_19_P00321356	FALSE	lncRNA			Agilent_HUMAN_G3V2	-	XLOC_l2_007834			chr2	242908343	242908402	+	intergenic					TTCATTTTGAGAGCTGCTCGCTGCCTGTTGTGGTTTCAGTTGACGGCCCACCGCTGTGTG
CUST_39591_PI429285431	1.28e-06	0.468789	lncRNA		CUST_39591_PI429285431	CUST_39591_PI429285431	FALSE	lncRNA	n387593|NULL|lncRNA|Homosapiens||UCSCGeneNoncode|uc011jdy.1||-0.9938060|-0.2694768		NONCODERv3	-				chr6	1225316	1227831	+	intergenic					GCACTTCTGCCCTTCTTAATGCCTGGAGTTAATTCCATCCTCAGATTTCATTTGAACTCA
CUST_7572_PI429285431	8.17e-05	0.442441	lncRNA		CUST_7572_PI429285431	CUST_7572_PI429285431	FALSE	lncRNA	lnc-JAM3-3:7		lncipedia2.1	-				chr11	133909657	133910367	+	intergenic					TGAGGCTGCACTTTCTCCCCGTTTCCCCTCAGGAAAAGACGCACCAGCAGCCTAGAATTC
LNCA_21_P0001600	5.61e-05	0.480988	lncRNA	XLOC_001124	LNCA_21_P0003620	LNCA_21_P0003620	FALSE	lncRNA			Agilent_HUMAN_G3V2	-	XLOC_003569			chr4	73435617	73435676	+	intergenic					AGTACACAGGCCTCAGCGACTCTTCCTCACACCCAGATTAAGTTATCAAATGATTTCTGC
CUST_5228_PI429285431	1.56e-08	0.377074	lncRNA		CUST_5228_PI429285431	CUST_5228_PI429285431	FALSE	lncRNA	"transcript_id ""ENST00000559752.1"" | genecode_v17"		gencode_v17	-				chr15	70796246	70796484	-	intergenic					GTGGATACCCGCCATGGCTTGTCTTCCCCGCCCACAGATAAATGCAACCTTTCTCTTCTA
CUST_10264_PI429285431	8.58e-08	0.475961	lncRNA		CUST_10264_PI429285431	CUST_10264_PI429285431	FALSE	lncRNA	lnc-FAM65C-2:1		lncipedia2.1	-				chr20	49010816	49011964	-	intergenic					TACTTCATTGCAATCCCTTCTTAGCAGAGAGGCTGACCCTGAATTCCCTCCTGAAATAGT
LNCA_33_P3311621	4.58e-07	0.263565	lncRNA	LOC338739
CUST_35813_PI429285431	0.000112743	0.369166	lncRNA		CUST_35830_PI429285431	CUST_35830_PI429285431	FALSE	lncRNA	n344503|NULL|lincRNA|Homosapiens|HumanlincRNA|ScriptureReconstructionLincRNAsByLuo[unpublished]|linc_luo_51|NULL|-1.2547000|-0.2238021		NONCODERv3	-				chr14	77425899	77428898	+	intergenic					TTTGCCAGTAATCCTCTCCCTAGAGGCTGAGGAAGACCACTTCTTCAAGCCCTATTTAAT
CUST_8340_PI429285431	1.96e-07	0.432601	lncRNA		CUST_8340_PI429285431	CUST_8340_PI429285431	FALSE	lncRNA	lnc-HAS1-1:1		lncipedia2.1	-				chr19	52198887	52199848	-	intergenic					AATTCCTACAAATATCCAGAACTCAGGATCCATCATTGCCTTCACTCCCTGAAACAGGGG
CUST_25096_PI429285431	7.21e-06	0.462766	lncRNA		CUST_25096_PI429285431	CUST_25096_PI429285431	FALSE	lncRNA	lnc-INPPL1-1:1		lncipedia2.1	-				chr11	72013656	72014233	+	intronic_antisense	CLPB	-	81570	ClpB caseinolytic peptidase B homolog (E. coli)	GCAAGTCTGTGTGATGCCCGTGTCCCTTTGATTTACTTTTCTTCAAAATGAATATATTTT
CUST_16927_PI429285431	2.79e-07	0.353035	lncRNA		CUST_16927_PI429285431	CUST_16927_PI429285431	FALSE	lncRNA	lnc-PIK3CG-2:3		lncipedia2.1	-				chr7	106417988	106418483	+	intergenic					TAAGTTATCGAGATGGACTTTTTCTCCCCTGCAGCATGCCAGAAACTATACAATCCACCC
CUST_7985_PI429285431	5.57e-10	2.09128	lncRNA		CUST_7985_PI429285431	CUST_7985_PI429285431	FALSE	lncRNA	lnc-KIAA1919-3:8		lncipedia2.1	-				chr6	111897565	111898048	+	intronic_antisense	TRAF3IP2	-	10758	TRAF3 interacting protein 2	TCTGTGGTATTGTGCTAACCGGTGGTGGGACTAAAACTGTCTCTATAATGTTTTATTTCT
CUST_5700_PI429285431	8.21e-10	2.16065	lncRNA		CUST_5700_PI429285431	CUST_5700_PI429285431	FALSE	lncRNA	"transcript_id ""ENST00000571595.1"" | genecode_v17"		gencode_v17	-				chr17	1615545	1616311	-	intergenic					ATAAGCAGCCTCAAGGACCAAGAACCATCTGCGAAAGGACACACACAGGAAATTCATAAA
CUST_17422_PI429285431	1.29e-05	2.46351	lncRNA		CUST_17422_PI429285431	CUST_17422_PI429285431	FALSE	lncRNA	lnc-APBB1IP-1:1		lncipedia2.1	-				chr10	26882863	26884975	+	intergenic					CCACAAGAGGCACGAAGCATCAATGTTCAGATGCCGCAAATGAATAAAATAAATGAATAA
CUST_48038_PI429285431	1.4e-07	3.28465	lncRNA		CUST_48038_PI429285431	CUST_48038_PI429285431	FALSE	lncRNA	"gi|410170317|ref|XR_159072.2| PREDICTED: Homo sapiens uncharacterized LOC100134822 (LOC100134822), misc_RNA"		ncbi	-													ATGAAATCAGTCATTATATGTTAGTGCTGCTCTGACATAGGGACGTGTTATTGAGAAGCA
CUST_19340_PI429285431	2.35e-10	6.31701	lncRNA		CUST_19374_PI429285431	CUST_19374_PI429285431	FALSE	lncRNA	lnc-AL358813.2-2:2		lncipedia2.1	-				chr1	149640790	149642891	+	intergenic					ATAACCCACAATTCTCATAGCTATTCTCAACTTAGAGAGGGCTGCTTTCTAGACACACCC
CUST_25913_PI429285431	2.26e-06	0.427231	lncRNA		CUST_25913_PI429285431	CUST_25913_PI429285431	FALSE	lncRNA	lnc-ATP6V1C1-1:1		lncipedia2.1	-				chr8	103905770	103906302	+	intergenic					ATTGTATTATAACCCCCTCCCAAACACTTAGTGCATCCTCCCACTCATGTAATTTGTTTA
CUST_51279_PI429285431	1.12e-06	2.38474	lncRNA		CUST_51279_PI429285431	CUST_51279_PI429285431	FALSE	lncRNA	hg19_lincRNAsTranscripts_TCONS_l2_00008519 range=chr15:30763608-30778338 5'pad=0 3'pad=0 strand=+ repeatMasking=none		UCSC	-				chr15	30763608	30765876	+	intergenic					AGTACTAAATGGGATCAGAATGAGCTCCTTTTGGAAGGAAACCTTTAATAGACTGGGAAA
LNCA_21_P0009130	0.000521555	0.464603	lncRNA	XLOC_011984	LNCA_21_P0012712	LNCA_21_P0012712	FALSE	lncRNA			Agilent_HUMAN_G3V2	-	XLOC_l2_010586			chr4	12249618	12249677	+	intergenic					GCATCTCCCTTTATCATCATCCTATTTTAAAGAGTAACACTGACTCGCAAACAATTTAGT
LNCA_21_P0005109	2.04e-07	0.434863	lncRNA	XLOC_005180	LNCA_21_P0008459	LNCA_21_P0008459	FALSE	lncRNA			Agilent_HUMAN_G3V2	-	XLOC_011068			chr14	73925721	73925780	-	intergenic					TGGAAACACTTCTTAAACACAACCTCTAATGTTGGTGTTTTGTAAGTACTACCCCTATGA
CUST_14648_PI429285431	3.27e-05	0.430095	lncRNA		CUST_14648_PI429285431	CUST_14648_PI429285431	FALSE	lncRNA	lnc-NPFFR2-2:1		lncipedia2.1	-				chr4	73435617	73435922	+	intergenic					AGTACACAGGCCTCAGCGACTCTTCCTCACACCCAGATTAAGTTATCAAATGATTTCTGC
CUST_34052_PI429285431	2.84e-06	2.45946	lncRNA		CUST_34052_PI429285431	CUST_34052_PI429285431	FALSE	lncRNA	n340870|AK125617|mRNAlikelncRNA|Homosapiens|HumanlncRNA|JounralRNA|3335|NULL|2.2915500|-0.2019946		NONCODERv3	-				chr17	74526667	74527039	+	intronic_antisense	CYGB	-	114757	cytoglobin	GCAGTTGGCTGTCTGGGATACTACCTACCTTCTTTTGTGTTCTTATTAATAAAATTAAAG
CUST_38070_PI429285431	0.000181433	0.420533	lncRNA		CUST_38070_PI429285431	CUST_38070_PI429285431	FALSE	lncRNA	n381041|NULL|lncRNA|Homosapiens||UCSCGeneNoncode|uc001ajc.3||1.3029800|-0.1472968		NONCODERv3	-				chr1	2281852	2284099	-	intronic_sense	MORN1	-	79906	MORN repeat containing 1	AAACAAACCCTCCAGAAACCTGCCTTTCACTGGTACAAATAAATCGACAAAGAGGGCAAA
CUST_40848_PI429285431	7.35e-05	0.461641	lncRNA		CUST_40848_PI429285431	CUST_40848_PI429285431	FALSE	lncRNA	n410620|NR_037861_5|lncRNA|Homosapiens||RefGeneNoncode|NR_037861_5||0.0806579|-0.2329433		NONCODERv3	-				chr6	3464619	3467343	+	intergenic					AAATGTTTTTAGGTCATCTGTCTTTGAGGTGGGCTGTTCACCTCCTTGTTCCCTTGTGGA
LNCA_33_P3318267	1.8e-07	0.445005	lncRNA	LOC100131193
[truncated: 2,304 more rows]
