# Supplementary material for: Construction and Comprehensive Analysis of Dysregulated Long Noncoding RNA-Associated Competing Endogenous RNA Network in Moyamoya Disease
Source: Comput Math Methods Med. 2020 Jun 13;2020:2018214. doi: 10.1155/2020/2018214 (PMC7306867; doi:10.1155/2020/2018214)
Supplement: Supplementary Materials — Table S1: DEmRNA list in excel file. Table S2: DElncRNA list in excel file. Table S3: increased miRNA list in excel file. Table S4: decreased miRNA list in excel file. Table S5: drugs in excel file. Figure S1: DElncRNA and DemiRNA in tiff format. [file 2018214.f1.zip › Table S5-Drug.xlsx]

## Sheet: Drugs
Rank	Score	Type	ID	Name	Description
17	96.31	cp	BRD-K30296925	flavokavain-b	Antineoplastic
19	95.82	cp	BRD-K68103045	CGS-20625	Benzodiazepine receptor agonist
26	94.43	cp	BRD-K40227168	vinburnine	Adrenergic receptor antagonist
32	92.91	cp	BRD-K25504083	cytochalasin-d	Actin polymerization inhibitor
35	92.71	cp	BRD-K64606589	apicidin	HDAC inhibitor
37	91.79	cp	BRD-A28105619	cucurbitacin-i	JAK inhibitor
42	90.66	cp	BRD-U73238814	QL-XI-92	DDR1 inhibitor
48	89.8	cp	BRD-K57011718	UK-356618	Metalloproteinase inhibitor
53	88.87	cp	BRD-K92413528	thiazolidinecarboxylic-acid	Reducing agent
56	87.99	cp	BRD-A81772229	simvastatin	HMGCR inhibitor
60	87.65	cp	BRD-K76907295	VU-0418947-2	HIF modulator
64	87.24	cp	BRD-K72034655	peucedanin	Apoptosis stimulant
66	86.82	cp	BRD-K92991072	PAC-1	Caspase activator
67	86.24	cp	BRD-K98548675	parthenolide	NFkB pathway inhibitor
68	86.21	cp	BRD-K30677119	PP-30	RAF inhibitor
73	85.2	cp	BRD-A57457122	VU-0400071-3	Glutamate receptor modulator
75	84.67	cp	BRD-K61829047	7b-cis	Exportin antagonist
78	84.48	cp	BRD-A15079084	phorbol-12-myristate-13-acetate	PKC activator
85	83.44	cp	BRD-K44432556	VU-0418946-1	HIF modulator
86	83.35	cp	BRD-K01567962	pyrazolanthrone	JNK inhibitor
87	83.3	cp	BRD-K69840642	ISOX	HDAC inhibitor
88	82.95	cp	BRD-K71512533	SNS-314	Aurora kinase inhibitor
93	82.5	cp	BRD-K50168500	canertinib	EGFR inhibitor
96	82.27	cp	BRD-K67868012	PI-103	MTOR inhibitor
97	82.25	cp	BRD-A43882281	pinacidil	ATP channel activator
98	82.19	cp	BRD-K00337317	NU-7441	DNA dependent protein kinase inhibitor
100	82.06	cp	BRD-K52911425	GDC-0941	PI3K inhibitor
101	81.7	cp	BRD-K67439147	SIB-1893	Glutamate receptor antagonist
104	81.46	cp	BRD-K28168037	fenretinide	Apoptosis stimulant
105	81.3	cp	BRD-K36395411	SB-206553	Serotonin receptor antagonist
107	81.03	cp	BRD-K21672174	RO-28-1675	Glucokinase activator
108	80.88	cp	BRD-K94441233	mevastatin	HMGCR inhibitor
109	80.6	cp	BRD-K56334280	amonafide	Topoisomerase inhibitor
111	80.44	cp	BRD-K37691127	hinokitiol	Tyrosinase inhibitor
112	80.25	cp	BRD-K82577285	dipropyl-dopamine	Dopamine receptor agonist
114	80.16	cp	BRD-K78485176	olmesartan	Angiotensin receptor antagonist
122	79.38	cp	BRD-K49294207	BIBU-1361	EGFR inhibitor
124	78.93	cp	BRD-A09539288	homatropine	Acetylcholine receptor antagonist
126	78.68	cp	BRD-K70914287	BIBX-1382	EGFR inhibitor
127	78.51	cp	BRD-A62025033	temsirolimus	MTOR inhibitor
131	77.99	cp	BRD-K13049116	BMS-754807	IGF-1 inhibitor
133	77.91	cp	BRD-K52751261	TAK-715	p38 MAPK inhibitor
135	77.4	cp	BRD-K28360340	TW-37	BCL inhibitor
136	77.34	cp	BRD-K41895714	AS-605240	PI3K inhibitor
137	77.08	cp	BRD-K95885906	quercetagetin	PIM inhibitor
139	76.73	cp	BRD-K08287586	butylparaben	DNA synthesis inhibitor
142	75.99	cp	BRD-K85606544	neratinib	EGFR inhibitor
143	75.57	cp	BRD-A85860691	chaetocin	Histone lysine methyltransferase inhibitor
146	75.38	cp	BRD-K09638361	SA-63133	-666
147	75.17	cp	BRD-K27305650	LY-294002	MTOR inhibitor
151	74.61	cp	BRD-K69932463	AZD-8055	MTOR inhibitor
153	74.54	cp	BRD-K20285085	fostamatinib	SYK inhibitor
155	74.41	cp	BRD-K61737877	VEGF-receptor-2-kinase-inhibitor-IV	VEGFR inhibitor
163	73.54	cp	BRD-K08502430	angiogenesis-inhibitor	Angiogenesis inhibitor
167	73	cp	BRD-K97056771	HY-11007	BCR-ABL kinase inhibitor
170	72.62	cp	BRD-K33572481	taurodeoxycholic-acid	Bile acid
174	72.34	cp	BRD-K99818283	PIK-90	PI3K inhibitor
178	71.87	cp	BRD-K82216340	medroxyprogesterone	progesterone receptor agonist
181	71.71	cp	BRD-K47983010	BX-795	IKK inhibitor
185	71.22	cp	BRD-K36198571	WAY-170523	Metalloproteinase inhibitor
188	70.87	cp	BRD-K41337261	ZM-306416	ABL inhibitor
189	70.8	cp	BRD-A95696820	acadesine	AMPK activator
190	70.71	cp	BRD-K43068349	AMG-9810	TRPV antagonist
191	70.58	cp	BRD-K63430059	methoxsalen	DNA synthesis inhibitor
201	69.26	cp	BRD-K73293050	WZ-3146	EGFR inhibitor
204	68.89	cp	BRD-K55420858	mirin	MRE11A exonuclease inhibitor
207	68.14	cp	BRD-K59331372	SB-366791	TRPV antagonist
209	67.74	cp	BRD-K73395020	SA-1478088	-666
210	67.63	cp	BRD-K05977823	tenovins	SIRT inhibitor
218	67.15	cp	BRD-K74761218	WT-171	HDAC inhibitor
220	67.02	cp	BRD-A34205397	suloctidil	Adrenergic receptor antagonist
226	66.71	cp	BRD-A45498368	WYE-125132	MTOR inhibitor
228	66.58	cp	BRD-K99498722	NPI-2358	Tubulin inhibitor
230	66.24	cp	BRD-K52080565	rilmenidine	Imidazoline receptor agonist
231	65.98	cp	BRD-A52650764	ingenol	PKC activator
237	65.42	cp	BRD-K97399794	quercetin	Polar auxin transport inhibitor
241	64.91	cp	BRD-K17743697	KB-R7943	Sodium/calcium exchange inhibitor
242	64.59	cp	BRD-K99964838	bosutinib	ABL inhibitor
245	63.75	cp	BRD-K76064317	tyrphostin-AG-1296	FLT3 inhibitor
246	63.39	cp	BRD-K35573744	erbstatin-analog	EGFR inhibitor
250	62.93	cp	BRD-K29733039	deforolimus	MTOR inhibitor
252	62.82	cp	BRD-K79124250	ioxaglic-acid	Radiopaque medium
260	62.33	cp	BRD-A96882008	L-732138	Tachykinin antagonist
264	62.06	cp	BRD-K16508793	diazepam	Benzodiazepine receptor agonist
266	61.43	cp	BRD-K61323504	SB-225002	CC chemokine receptor antagonist
275	60.66	cp	BRD-A16934955	nalbuphine	Opioid receptor agonist
280	60.19	cp	BRD-K77008974	WYE-354	MTOR inhibitor
281	60.14	cp	BRD-K21806131	tegaserod	Serotonin receptor partial agonist
285	59.97	cp	BRD-A74980173	gatifloxacin	Bacterial DNA gyrase inhibitor
294	58.2	cp	BRD-K25905511	buddleoflavonoloside	Acetylcholinesterase inhibitor
295	58.03	cp	BRD-A09062839	amylocaine	Local anesthetic
298	57.91	cp	BRD-K07888107	depudecin	HDAC inhibitor
299	57.89	cp	BRD-K83023055	GR-135531	Melatonin receptor agonist
305	57.35	cp	BRD-A43849199	karakoline	Phytotoxin
307	57.03	cp	BRD-U88459701	atorvastatin	HMGCR inhibitor
309	56.95	cp	BRD-K28912512	nicotinamide	Protein synthesis stimulant
311	56.64	cp	BRD-K78692225	leflunomide	Dihydroorotate dehydrogenase inhibitor
312	56.56	cp	BRD-K46056750	AZD-7762	CHK inhibitor
313	56.54	cp	BRD-K93658967	aloisine	CDK inhibitor
315	56.3	cp	BRD-A41301928	bongkrek-acid	Mitochondrial ADP, ATP translocase inhibitor
320	55.8	cp	BRD-K07881437	danusertib	Aurora kinase inhibitor
321	55.78	cp	BRD-K17378184	prestwick-559	Dopamine receptor agonist
325	55.34	cp	BRD-A32161980	carbetocin	Oxytocin receptor agonist
326	55.19	cp	BRD-K90543092	levonorgestrel	Estrogen receptor agonist
333	54.67	cp	BRD-K46469693	SCH-442416	Adenosine receptor antagonist
334	54.53	cp	BRD-K69328504	L-690488	Inositol monophosphatase inhibitor
335	54.52	cp	BRD-K05653692	DL-PDMP	Glucosyltransferase inhibitor
341	54.01	cp	BRD-K07265709	razoxane	Chelating agent
343	53.89	cp	BRD-K15842202	eudesmic-acid	-666
344	53.79	cp	BRD-K64890080	BI-2536	PLK inhibitor
347	53.68	cp	BRD-A11605036	thiocolchicoside	GABA receptor antagonist
348	53.66	cp	BRD-K65814004	diphenyleneiodonium	Nitric oxide synthase inhibitor
353	52.91	cp	BRD-K28761384	zuclopenthixol	Dopamine receptor antagonist
354	52.88	cp	BRD-K19295594	gossypol	BCL inhibitor
362	52.33	cp	BRD-K72783841	tyrphostin-AG-555	EGFR inhibitor
363	52.27	cp	BRD-K78278890	NM-PP1	Mutant kinase inhibitor
365	52.08	cp	BRD-K41731458	triclosan	Enoyl-[acyl-carrier-protein] reductase [NADH] inhibitor
366	51.89	cp	BRD-A37052580	physostigmine	Acetylcholinesterase inhibitor
367	51.89	cp	BRD-K98493452	honokiol	AKT inhibitor
371	51.55	cp	BRD-K76304753	phenazopyridine	Local anesthetic
372	51.53	cp	BRD-A71765365	mepireserpate	Catecholamine depleting sympatholytic
377	51.38	cp	BRD-K44779798	miglitol	Glucosidase inhibitor
382	51.08	cp	BRD-K42573370	avrainvillamide-analog-2	nucleophosmin inhibitor
383	50.96	cp	BRD-A83326220	brazilin	Nitric oxide production inhibitor
385	50.9	cp	BRD-K66296774	fluvastatin	HMGCR inhibitor
386	50.89	cp	BRD-K40742111	baeomycesic-acid	Lipoxygenase inhibitor
388	50.88	cp	BRD-K76840893	RS-17053	Adrenergic receptor antagonist
390	50.77	cp	BRD-K00673382	famotidine	Histamine receptor antagonist
394	50.42	cp	BRD-K12502280	TG-101348	FLT3 inhibitor
401	50.05	cp	BRD-A32349859	methyl-angolensate	Apoptosis inhibitor
402	50	cp	BRD-K84709232	caffeic-acid	Lipoxygenase inhibitor
405	49.83	cp	BRD-K68065987	MK-2206	AKT inhibitor
407	49.57	cp	BRD-U25771771	WZ-4-145	EGFR inhibitor
420	48.64	cp	BRD-K47869605	podophyllotoxin	Microtubule inhibitor
423	48.5	cp	BRD-K33583600	isoliquiritigenin	Guanylate cyclase activator
426	48.16	cp	BRD-K29530284	amlexanox	Histamine receptor modulator
427	47.95	cp	BRD-K79131256	albendazole	Anthelmintic
428	47.93	cp	BRD-K05658747	raltegravir	HIV integrase inhibitor
431	47.69	cp	BRD-K14920963	erythrosine	Coloring agent
436	47.52	cp	BRD-K60184833	tyrphostin-46	Tyrosine kinase inhibitor
442	46.93	cp	BRD-K61314889	IWR-1-ENDO	PARP inhibitor
445	46.7	cp	BRD-K42679050	Y-27152	Potassium channel activator
451	46.35	cp	BRD-K37206356	rhamnetin	HDAC inhibitor
453	46.2	cp	BRD-A07875874	cilnidipine	Calcium channel blocker
458	45.64	cp	BRD-K67566344	KU-0063794	MTOR inhibitor
460	45.54	cp	BRD-K25741894	skimmianine	Acetylcholinesterase inhibitor
463	45.34	cp	BRD-K68488863	ENMD-2076	FLT3 inhibitor
466	45.04	cp	BRD-K63641886	cefuroxime	Bacterial cell wall synthesis inhibitor
471	44.75	cp	BRD-K19554809	MK-212	Serotonin receptor agonist
472	44.69	cp	BRD-K56450366	NSC-94258	Antineoplastic
474	44.63	cp	BRD-K51290057	SA-792709	Retinoid receptor agonist
485	43.68	cp	BRD-K04466929	Merck60	HDAC inhibitor
491	43.37	cp	BRD-K06926592	tretinoin	Retinoid receptor agonist
492	43.35	cp	BRD-K50660797	epicatechin	Bacterial DNA gyrase inhibitor
497	43.27	cp	BRD-K06712146	YM-90709	IL5 inhibitor
508	42.43	cp	BRD-K68174511	torin-2	MTOR inhibitor
509	42.42	cp	BRD-K67844266	MLN-4924	Nedd activating enzyme inhibitor
513	42.19	cp	BRD-K58299615	RO-90-7501	Beta amyloid inhibitor
514	42.09	cp	BRD-K34581968	BMS-536924	IGF-1 inhibitor
526	41.18	cp	BRD-K41160163	fenobam	Glutamate receptor antagonist
531	40.84	cp	BRD-K80325895	eicosadienoic-acid	-666
536	40.56	cp	BRD-K34508425	KUC103898N	-666
544	39.88	cp	BRD-K02953697	naringin	Cytochrome P450 inhibitor
550	39.43	cp	BRD-K48932581	cetraxate	Mucus protecting agent
552	39.16	cp	BRD-K70281171	U-99194	Dopamine receptor antagonist
556	38.94	cp	BRD-K36009368	NNC-63-0532	Opioid receptor agonist
558	38.9	cp	BRD-K57546357	prunetin	Breast cancer resistance protein inhibitor
560	38.89	cp	BRD-K00312224	PPT	Estrogen receptor agonist
570	38.29	cp	BRD-K24656285	farnesol	FXR agonist
572	38.18	cp	BRD-K29178788	dictamnine	Furoquinoline alkaloid
575	37.85	cp	BRD-K78633253	EXO-1	ARF inhibitor
577	37.81	cp	BRD-A70407468	PSB-36	Adenosine receptor antagonist
581	37.65	cp	BRD-K17294426	clebopride	Dopamine receptor antagonist
584	37.4	cp	BRD-A70731303	avrainvillamide-analog-5	nucleophosmin inhibitor
585	37.27	cp	BRD-K99291625	SB-203580	p38 MAPK inhibitor
590	37.02	cp	BRD-K97365803	PI-828	PI3K inhibitor
597	36.36	cp	BRD-K52522949	NCH-51	HDAC inhibitor
598	36.35	cp	BRD-K26997899	SA-792574	Microtubule inhibitor
599	36.26	cp	BRD-K18059238	gamma-linolenic-acid	Cyclooxygenase inhibitor
602	36.13	cp	BRD-K82688027	RG-13022	PDGFR receptor inhibitor
603	36.13	cp	BRD-A65076780	dihydroergocristine	Adrenergic receptor antagonist
604	35.97	cp	BRD-K10176267	L-701252	Glutamate receptor antagonist
606	35.84	cp	BRD-K94841585	emodic-acid	Laxative
607	35.75	cp	BRD-K06878038	deferiprone	Chelating agent
608	35.66	cp	BRD-A51393488	noscapine	Bradykinin receptor antagonist
610	35.57	cp	BRD-K63068307	ZSTK-474	PI3K inhibitor
611	35.54	cp	BRD-K16336526	capsaicin	TRPV agonist
612	35.42	cp	BRD-K88551539	CAY-10585	HIF modulator
617	35.16	cp	BRD-K01253243	SB-590885	RAF inhibitor
618	35.14	cp	BRD-K71266197	PSB-06126	NTPDase inhibitor
623	34.82	cp	BRD-K05104363	PD-184352	MEK inhibitor
626	34.74	cp	BRD-A07780951	orciprenaline	Adrenergic receptor agonist
633	34.21	cp	BRD-K68392338	ZK-93426	Benzodiazepine receptor antagonist
636	34.16	cp	BRD-K72676686	fluvoxamine	Selective serotonin reuptake inhibitor (SSRI)
638	33.95	cp	BRD-K78084463	W-12	Calmodulin antagonist
640	33.92	cp	BRD-K11911061	GR-127935	Serotonin receptor antagonist
642	33.83	cp	BRD-K20197062	SA-94315	Caspase inhibitor
647	33.48	cp	BRD-K51816706	oxindole-I	VEGFR inhibitor
649	33.43	cp	BRD-K84141129	VU-0400193-3	Glutamate receptor modulator
650	33.42	cp	BRD-K78122587	NNC-55-0396	T-type calcium channel blocker
657	33.14	cp	BRD-A59215453	lobelanidine	Acetylcholine receptor antagonist
661	33.03	cp	BRD-K83837640	JNJ-26854165	HDAC inhibitor
663	32.88	cp	BRD-K20755323	SA-792728	Sphingosine kinase inhibitor
664	32.64	cp	BRD-K77987382	mebendazole	Tubulin inhibitor
665	32.62	cp	BRD-M07438658	lapatinib	EGFR inhibitor
667	32.6	cp	BRD-U08759356	EI-346-erlotinib-analog	EGFR inhibitor
668	32.55	cp	BRD-K19894101	MST-312	Telomerase inhibitor
670	32.52	cp	BRD-K00603606	ticlopidine	Purinergic receptor antagonist
672	32.43	cp	BRD-K50836978	purvalanol-a	CDK inhibitor
673	32.42	cp	BRD-K53857191	risperidone	Dopamine receptor antagonist
678	32.27	cp	BRD-K94649603	taxifolin	Opioid receptor antagonist
679	32.26	cp	BRD-A15297126	fluocinonide	Glucocorticoid receptor agonist
684	31.84	cp	BRD-K81376179	TCS-359	FLT3 inhibitor
690	31.65	cp	BRD-A97739905	ketoprofen	Cyclooxygenase inhibitor
692	31.62	cp	BRD-A22707317	SB-205384	GABA receptor modulator
694	31.47	cp	BRD-K12219985	glipizide	Sulfonylurea
695	31.37	cp	BRD-K97354755	SU-6656	SRC inhibitor
699	31.24	cp	BRD-K11905747	spectinomycin	Bacterial 30S ribosomal subunit inhibitor
700	31.23	cp	BRD-A50675702	fipronil	GABA gated chloride channel blocker
702	31.14	cp	BRD-K48427617	U-0124	MEK inhibitor
708	30.69	cp	BRD-A19248578	latrunculin-b	Actin polymerization inhibitor
709	30.69	cp	BRD-A11678676	wortmannin	PI3K inhibitor
712	30.62	cp	BRD-A83892713	rifampicin	RNA polymerase inhibitor
716	30.45	cp	BRD-K11663430	pyroxamide	HDAC inhibitor
717	30.45	cp	BRD-K41445866	alfaxalone	Chloride channel agonist
720	30.4	cp	BRD-K64044582	linoleamide	ACAT inhibitor
721	30.39	cp	BRD-K49519144	LY-2140023	Glutamate receptor agonist
722	30.38	cp	BRD-A01787639	naftopidil	Adrenergic receptor antagonist
724	30.35	cp	BRD-K47598052	PP-1	SRC inhibitor
725	30.35	cp	BRD-K09186807	KIN001-244	Phosphoinositide dependent kinase inhibitor
726	30.3	cp	BRD-A77050075	heraclenol	Vitamin K antagonist
728	30.22	cp	BRD-K17497770	butein	EGFR inhibitor
730	30.2	cp	BRD-K49945136	GR-113808	Serotonin receptor antagonist
732	30.17	cp	BRD-A50737080	CGK-733	ATR kinase inhibitor
735	30.06	cp	BRD-K65503129	HSP90-inhibitor	HSP inhibitor
736	30.06	cp	BRD-K21680192	mitoxantrone	Topoisomerase inhibitor
737	30.03	cp	BRD-A36267905	buphenine	Adrenergic receptor agonist
739	29.95	cp	BRD-A35623999	CGP-37157	L-type calcium channel blocker
746	29.57	cp	BRD-K74733595	APHA-compound-8	HDAC inhibitor
748	29.41	cp	BRD-K10065684	dantron	Laxative
749	29.37	cp	BRD-K43405658	tyrphostin-AG-527	Protein tyrosine kinase inhibitor
752	29.16	cp	BRD-K46742498	alosetron	Serotonin receptor antagonist
753	29.15	cp	BRD-K82731415	olomoucine	CDK inhibitor
756	29.09	cp	BRD-K84996949	sinensetin	Cyclooxygenase inhibitor
758	29.04	cp	BRD-K02130563	panobinostat	HDAC inhibitor
761	28.89	cp	BRD-K33882852	ZK-93423	Benzodiazepine receptor agonist
763	28.84	cp	BRD-K40892394	AR-C133057XX	Nitric oxide synthase inhibitor
764	28.84	cp	BRD-A83855350	naltrexone	Opioid receptor antagonist
767	28.79	cp	BRD-A99571536	dubinidine	Anti-epileptic
771	28.71	cp	BRD-A69960130	bromocriptine	Dopamine receptor agonist
775	28.54	cp	BRD-A87848830	bimatoprost	Prostanoid receptor agonist
778	28.4	cp	BRD-K72420232	WZ-4002	EGFR inhibitor
780	28.28	cp	BRD-K81418486	vorinostat	HDAC inhibitor
786	28.2	cp	BRD-K12102668	nialamide	Monoamine oxidase inhibitor
787	28.17	cp	BRD-K43290182	Ro-04-6790	Serotonin receptor antagonist
791	28.09	cp	BRD-K20714604	RS-56812	Serotonin receptor partial agonist
792	28.03	cp	BRD-K52850071	JAK3-Inhibitor-II	JAK inhibitor
794	27.97	cp	BRD-K95992530	Cyclo-[Arg-Gly-Asp-D-Phe-Val]	integrin antagonist
795	27.95	cp	BRD-K88868628	iodoacetic-acid	Cysteine peptidase inhibitor
798	27.85	cp	BRD-K91263825	nortriptyline	Tricyclic antidepressant
799	27.84	cp	BRD-K55677650	CO-101244	Ionotropic glutamate receptor antagonist
801	27.81	cp	BRD-A33168282	sotalol	Adrenergic receptor antagonist
802	27.8	cp	BRD-A19736161	ondansetron	Serotonin receptor antagonist
812	27.34	cp	BRD-K66019333	oxantel	Anthelmintic
814	27.19	cp	BRD-A48720949	testosterone	androgen receptor agonist
816	27.1	cp	BRD-K22385716	LY-303511	Casein kinase inhibitor
817	27.1	cp	BRD-K55191674	benzylpenicillin	Penicillin binding protein inhibitor
821	27.05	cp	BRD-K17140735	SCH-79797	Proteasome inhibitor
823	27	cp	BRD-A21858158	praziquantel	Anthelmintic
825	26.92	cp	BRD-K02965346	SU-11274	Hepatocyte growth factor receptor inhibitor
826	26.91	cp	BRD-M86331534	pyrvinium-pamoate	AKT inhibitor
827	26.86	cp	BRD-A54927599	KF-38789	P-selectin inhibitor
832	26.72	cp	BRD-K11801786	trimidox	Ribonucleotide reductase inhibitor
837	26.6	cp	BRD-K29950728	clomifene	Estrogen receptor antagonist
840	26.56	cp	BRD-K14618467	IKK-16	IKK inhibitor
844	26.46	cp	BRD-K11558771	droxinostat	HDAC inhibitor
845	26.45	cp	BRD-A56012032	thiorphan	Membrane metalloendopeptidase inhibitor
846	26.44	cp	BRD-K82941592	rosuvastatin	HMGCR inhibitor
850	26.1	cp	BRD-A24122750	saclofen	GABA receptor antagonist
851	26.1	cp	BRD-K57080016	selumetinib	MEK inhibitor
855	25.88	cp	BRD-K95676198	JAK3-inhibitor-V	JAK inhibitor
856	25.88	cp	BRD-K06335600	tizanidine	Adrenergic receptor agonist
859	25.84	cp	BRD-K29555132	arachidonamide	Cannabinoid receptor agonist
860	25.83	cp	BRD-K32292990	CGP-53353	EGFR inhibitor
861	25.82	cp	BRD-A78295502	hydroquinine	Antiarrhythmic
862	25.78	cp	BRD-K76908866	CP-724714	EGFR inhibitor
867	25.65	cp	BRD-K30097969	pitavastatin	HMGCR inhibitor
868	25.64	cp	BRD-K95851186	CGP-13501	GABA receptor modulator
873	25.14	cp	BRD-K26664453	cytochalasin-b	Microtubule inhibitor
874	25.07	cp	BRD-K10870738	CDC	Lipoxygenase inhibitor
875	25.02	cp	BRD-A10969569	ambelline	Plant alkaloid
880	24.93	cp	BRD-K94887716	TFMPP	Serotonin receptor agonist
883	24.84	cp	BRD-K04877770	FTase-inhibitor-B581	Farnesyltransferase inhibitor
885	24.78	cp	BRD-K51476772	ST-638	Tyrosine kinase inhibitor
889	24.64	cp	BRD-K19284129	salvinorin-a	Opioid receptor agonist
892	24.43	cp	BRD-A36217750	sulfinpyrazone	Uricosuric blocker
893	24.37	cp	BRD-K09499853	KU-0060648	DNA dependent protein kinase inhibitor
898	24.24	cp	BRD-A23072235	pheniramine	Histamine receptor antagonist
901	24.11	cp	BRD-K42452249	EO-1428	p38 MAPK inhibitor
912	23.77	cp	BRD-K58772419	AZD-6482	PI3K inhibitor
913	23.75	cp	BRD-K80725632	lavendustin-c	EGFR inhibitor
915	23.71	cp	BRD-K15519488	CS-110266	Dopamine receptor agonist
922	23.49	cp	BRD-K18895904	olanzapine	Dopamine receptor antagonist
924	23.41	cp	BRD-U44700465	HG-5-88-01	Protein kinase inhibitor
925	23.39	cp	BRD-K66412701	pazufloxacin	Topoisomerase inhibitor
930	23.32	cp	BRD-A94543220	bifonazole	Sterol demethylase inhibitor
933	23.27	cp	BRD-A98299281	velnacrine	cholinesterase inhibitor
938	23.13	cp	BRD-K28120222	parthenolide	NFkB pathway inhibitor
948	22.97	cp	BRD-K20152659	gamma-homolinolenic-acid	Cholesterol inhibitor
951	22.83	cp	BRD-A99411506	esculin	Antioxidant
954	22.78	cp	BRD-K77677632	SB-200646	Serotonin receptor antagonist
955	22.7	cp	BRD-K79366068	PSB-069	NTPDase inhibitor
956	22.66	cp	BRD-K32398298	alprazolam	Benzodiazepine receptor agonist
959	22.62	cp	BRD-K24201553	SB-269970	Serotonin receptor antagonist
962	22.55	cp	BRD-K19540840	saracatinib	SRC inhibitor
964	22.47	cp	BRD-K92428232	GSK-461364	PLK inhibitor
966	22.45	cp	BRD-K27721098	clopidogrel	Purinergic receptor antagonist
971	22.38	cp	BRD-A27489425	rolitetracycline	Bacterial 30S ribosomal subunit inhibitor
975	22.1	cp	BRD-K51018020	VAMA-37	DNA dependent protein kinase inhibitor
981	21.86	cp	BRD-K24240364	GYKI-52466	Glutamate receptor antagonist
985	21.74	cp	BRD-K79602928	metformin	Insulin sensitizer
993	21.52	cp	BRD-K27141178	SB-203186	Serotonin receptor antagonist
995	21.39	cp	BRD-K53913732	SB-408124	Orexin receptor antagonist
999	21.24	cp	BRD-A73741725	exemestane	Aromatase inhibitor
1003	21.15	cp	BRD-K72541103	JAK3-inhibitor-I	JAK inhibitor
1004	21.15	cp	BRD-K38251852	paxilline	Potassium channel blocker
1007	20.84	cp	BRD-K17110974	aristolochic-acid	Phospholipase inhibitor
1008	20.76	cp	BRD-K59753975	vindesine	Tubulin inhibitor
1009	20.63	cp	BRD-K79425933	benperidol	Dopamine receptor antagonist
1010	20.62	cp	BRD-K64052750	gefitinib	EGFR inhibitor
1011	20.57	cp	BRD-K67013324	luzindole	Melatonin receptor antagonist
1014	20.54	cp	BRD-K82561139	ricinine	Casein kinase inhibitor
1016	20.43	cp	BRD-K59522102	piperine	Monoamine oxidase inhibitor
1018	20.31	cp	BRD-K72903603	zidovudine	Reverse transcriptase inhibitor
1023	20.18	cp	BRD-K05434375	HA-1004	Calcium channel blocker
1029	19.92	cp	BRD-A97730597	hexylcaine	Sodium channel blocker
1035	19.78	cp	BRD-K83988098	alvespimycin	HSP inhibitor
1037	19.68	cp	BRD-K29905972	axitinib	PDGFR receptor inhibitor
1038	19.65	cp	BRD-A84134924	pancuronium	Acetylcholine receptor antagonist
1042	19.6	cp	BRD-K26818574	BIX-01294	Histone lysine methyltransferase inhibitor
1051	19.4	cp	BRD-K08219523	5-nonyloxytryptamine	Serotonin receptor agonist
1056	19.29	cp	BRD-K05528470	L-745870	Dopamine receptor antagonist
1060	19.18	cp	BRD-A92585442	RU-28318	Cytochrome P450 inhibitor
1068	19	cp	BRD-K63516691	T-0156	Phosphodiesterase inhibitor
1070	18.99	cp	BRD-A30205217	ethotoin	Hydantoin antiepileptic
1071	18.98	cp	BRD-K17674993	diflorasone	Corticosteroid agonist
1072	18.97	cp	BRD-A43331270	niguldipine	Calcium channel blocker
1074	18.96	cp	BRD-K05926469	lenalidomide	Antineoplastic
1075	18.96	cp	BRD-A93000692	ciglitazone	PPAR receptor agonist
1079	18.82	cp	BRD-A43940795	tetrahydropalmatine	Serotonin release inhibitor
1081	18.71	cp	BRD-K00532621	midazolam	Benzodiazepine receptor agonist
1083	18.65	cp	BRD-A56020723	CA-074-Me	Cathepsin inhibitor
1084	18.62	cp	BRD-A84327315	calcitriol	Vitamin D receptor agonist
1086	18.49	cp	BRD-K00206590	P-1075	ATP channel activator
1087	18.48	cp	BRD-K70327191	benzoxiquine	Anti-infective
1092	18.46	cp	BRD-A65280694	molindone	Dopamine receptor antagonist
1093	18.44	cp	BRD-K82562631	tolmetin	Cyclooxygenase inhibitor
1094	18.41	cp	BRD-K35483542	alitretinoin	Retinoid receptor agonist
1095	18.41	cp	BRD-K98521173	desoxycortone	Mineralocorticoid receptor agonist
1096	18.41	cp	BRD-K76133116	benzydamine	Membrane integrity inhibitor
1098	18.39	cp	BRD-K64341947	CFM-1571	Guanylate cyclase activator
1101	18.33	cp	BRD-K22503835	scriptaid	HDAC inhibitor
1102	18.26	cp	BRD-A13188892	doxazosin	Adrenergic receptor antagonist
1109	18.04	cp	BRD-K17349619	HLI-373	MDM inhibitor
1114	17.98	cp	BRD-A73368467	fexofenadine	Histamine receptor antagonist
1116	17.96	cp	BRD-K82746043	navitoclax	BCL inhibitor
1119	17.85	cp	BRD-K54256913	MK-1775	WEE1 kinase inhibitor
1120	17.82	cp	BRD-A12560204	nitrendipine	Calcium channel blocker
1122	17.79	cp	BRD-A51410489	yohimbine	Adrenergic receptor antagonist
1123	17.79	cp	BRD-A43150328	penicillic-acid	other antibiotic
1124	17.72	cp	BRD-K69650333	idarubicin	Topoisomerase inhibitor
1126	17.71	cp	BRD-K89162000	tandutinib	FLT3 inhibitor
1130	17.61	cp	BRD-K33226500	indinavir	HIV protease inhibitor
1131	17.59	cp	BRD-A15914070	4-hydroxy-2-nonenal	Cytotoxic lipid peroxidation product
1133	17.55	cp	BRD-K01555864	dibenzoylmethane	Antineoplastic
1138	17.42	cp	BRD-A34255068	rolipram	Phosphodiesterase inhibitor
1140	17.4	cp	BRD-A55946879	BW-B70C	Lipoxygenase inhibitor
1144	17.29	cp	BRD-K85030058	benactyzine	Acetylcholine receptor antagonist
1146	17.15	cp	BRD-K03642198	AY-9944	Hedgehog pathway modulator
1149	17.09	cp	BRD-A65767837	hydrocortisone	Glucocorticoid receptor agonist
1151	17.04	cp	BRD-K09485525	GANT-61	GLI antagonist
1153	16.99	cp	BRD-K02123250	JNJ-38877605	Tyrosine kinase inhibitor
1154	16.97	cp	BRD-K16485616	mocetinostat	HDAC inhibitor
1155	16.96	cp	BRD-K59773493	benzohydroxamic-acid	Antifungal
1157	16.91	cp	BRD-K19111024	clofibric-acid	PPAR receptor agonist
1163	16.76	cp	BRD-A41692738	TGX-221	PI3K inhibitor
1164	16.75	cp	BRD-K85871428	SC-68376	p38 MAPK inhibitor
1165	16.74	cp	BRD-K45861246	azaperone	Dopamine receptor antagonist
1166	16.69	cp	BRD-K04976539	aminogenistein	SRC inhibitor
1167	16.68	cp	BRD-K12994359	valdecoxib	Cyclooxygenase inhibitor
1173	16.52	cp	BRD-K18779551	bifemelane	Acetylcholine release stimulant
1175	16.41	cp	BRD-K73109821	diazoxide	Potassium channel activator
1176	16.4	cp	BRD-K31054881	BMY-7378	Adrenergic receptor antagonist
1178	16.38	cp	BRD-A56987319	SQ-22536	Adenylyl cyclase inhibitor
1181	16.32	cp	BRD-K87919739	tyrphostin-AG-825	Receptor tyrosine protein kinase inhibitor
1186	16.24	cp	BRD-K94830329	ataluren	CFTR channel agonist
1187	16.23	cp	BRD-K98490050	amsacrine	Topoisomerase inhibitor
1189	16.2	cp	BRD-K62792802	LY-83583	Guanylyl cyclase inhibitor
1191	16.17	cp	BRD-K46556543	canrenoic-acid	Mineralocorticoid receptor antagonist
1195	15.97	cp	BRD-A79314293	cephalosporanic-acid	Bacterial cell wall synthesis inhibitor
1197	15.93	cp	BRD-K87510569	RS-504393	CC chemokine receptor antagonist
1199	15.92	cp	BRD-A44448661	pentobarbital	Barbiturate antiepileptic
1200	15.91	cp	BRD-A58157837	butabindide	Tripeptidyl peptidase inhibitor
1202	15.84	cp	BRD-K11717138	benzbromarone	Chloride channel blocker
1203	15.8	cp	BRD-K36740062	GSK-1070916	Aurora kinase inhibitor
1204	15.78	cp	BRD-K56957086	dacinostat	HDAC inhibitor
1205	15.74	cp	BRD-A27554692	altrenogest	Progestogen hormone
1208	15.66	cp	BRD-A25569250	KI-16425	Lysophosphatidic acid receptor antagonist
1213	15.57	cp	BRD-A80638690	floxuridine	DNA synthesis inhibitor
1221	15.43	cp	BRD-K64157027	ZD-2079	Adrenergic receptor agonist
1222	15.4	cp	BRD-A72988804	tiaprofenic-acid	Cyclooxygenase inhibitor
1233	15.12	cp	BRD-K39120595	bithionol	Autotaxin inhibitor
1237	15.08	cp	BRD-K54771420	glycocholic-acid	Cholesterol inhibitor
1239	15.06	cp	BRD-K32836707	CAY-10577	Casein kinase inhibitor
1243	14.94	cp	BRD-K64517075	heliomycin	ATP synthase inhibitor
1248	14.8	cp	BRD-K88625236	nonoxynol-9	Membrane integrity inhibitor
1251	14.68	cp	BRD-K37814297	acepromazine	Dopamine receptor antagonist
1252	14.68	cp	BRD-K12184916	dactolisib	MTOR inhibitor
1254	14.64	cp	BRD-K33312228	halometasone	Glucocorticoid receptor agonist
1255	14.61	cp	BRD-K47693913	evoxine	Furoquinoline alkaloid
1256	14.59	cp	BRD-A41722204	sulmazole	Adenosine receptor antagonist
1257	14.57	cp	BRD-A68888262	azelastine	Histamine receptor antagonist
1262	14.51	cp	BRD-K95739795	tetrabenazine	Vesicular monoamine transporter inhibitor
1264	14.48	cp	BRD-A62525898	prednisone	Glucocorticoid receptor agonist
1269	14.38	cp	BRD-K39111395	BCL2-inhibitor	BCL inhibitor
1274	14.26	cp	BRD-A66563878	medetomidine	Adrenergic receptor agonist
1282	14.17	cp	BRD-K09635134	l-erythro-MAPP	negative control for D-erythro-MAPP
1284	14.04	cp	BRD-K45479396	BP-554	Serotonin receptor agonist
1288	13.91	cp	BRD-K11373525	ZD-7155	Angiotensin receptor antagonist
1289	13.9	cp	BRD-K09416995	lovastatin	HMGCR inhibitor
1292	13.66	cp	BRD-K31633810	DAU-5884	Acetylcholine receptor antagonist
1297	13.58	cp	BRD-K42748308	XE-991	Potassium channel blocker
1298	13.57	cp	BRD-A18497530	5-iodotubercidin	Adenosine kinase inhibitor
1303	13.48	cp	BRD-K60690191	MPEP	Glutamate receptor antagonist
1305	13.47	cp	BRD-A72596465	GW-6471	PPAR receptor antagonist
1308	13.41	cp	BRD-A65013509	oxybutynin	Acetylcholine receptor antagonist
1310	13.37	cp	BRD-A93659613	GR-89696	Opioid receptor agonist
1311	13.36	cp	BRD-K53263234	CITCO	CAR agonist
1312	13.34	cp	BRD-K19462402	buflomedil	Adrenergic receptor antagonist
1318	13.23	cp	BRD-A80641450	FR-139317	Endothelin receptor antagonist
1321	13.14	cp	BRD-K43887077	dopamine	Dopamine receptor agonist
1322	13.13	cp	BRD-K31912990	CGP-71683	Neuropeptide receptor antagonist
1325	12.96	cp	BRD-K95785537	PP-2	SRC inhibitor
1328	12.91	cp	BRD-A62434282	goserelin	Gonadotropin releasing factor hormone receptor agonist
1331	12.86	cp	BRD-K12513978	fenbufen	Cyclooxygenase inhibitor
1332	12.83	cp	BRD-K15616905	CCCP	Mitochondrial oxidative phosphorylation uncoupler
1335	12.76	cp	BRD-K70487031	flupentixol	Dopamine receptor antagonist
1337	12.6	cp	BRD-K22631935	neurodazine	Neurogenesis of non-pluripotent C2C12 myoblast inducer
1344	12.44	cp	BRD-K69837166	trap-101	Nociceptin/orphanin FQ (NOP) receptor antagonist
1345	12.42	cp	BRD-K06750613	GSK-1059615	PI3K inhibitor
1348	12.38	cp	BRD-A00993607	alprenolol	Adrenergic receptor antagonist
1350	12.35	cp	BRD-K24526313	levcromakalim	Potassium channel activator
1352	12.26	cp	BRD-K79090631	CGP-60474	CDK inhibitor
1353	12.25	cp	BRD-K69032158	diprotin-a	Dipeptidyl peptidase inhibitor
1360	12.1	cp	BRD-A58955223	sulforaphane	Antineoplastic
1362	12.03	cp	BRD-A07824748	flavanone	11-beta-HSD1 inhibitor
1364	11.98	cp	BRD-K37792168	denbufylline	Phosphodiesterase inhibitor
1365	11.97	cp	BRD-K77771411	moxonidine	Imidazoline receptor agonist
1367	11.94	cp	BRD-K62810658	PD-98059	MEK inhibitor
1368	11.91	cp	BRD-A08003242	rhodomyrtoxin-b	sodium fluorescein uptake inhibitor
1370	11.9	cp	BRD-K40578143	GR-79236	Adenosine receptor agonist
1373	11.84	cp	BRD-K39621635	artemether	Antimalarial
1374	11.83	cp	BRD-K14888893	minoxidil	KATP activator
1376	11.8	cp	BRD-K80348542	cephaeline	Protein synthesis inhibitor
1379	11.72	cp	BRD-K78431006	crizotinib	ALK inhibitor
1387	11.62	cp	BRD-K60460488	nelfinavir	HIV protease inhibitor
1397	11.47	cp	BRD-K98157055	SIB-1757	Glutamate receptor antagonist
1398	11.46	cp	BRD-A16478930	amcinonide	Glucocorticoid receptor agonist
1402	11.39	cp	BRD-K15601958	SEW-2871	Lysophospholipid receptor agonist
1407	11.36	cp	BRD-K61951118	FG-7142	GABA benzodiazepine site receptor inverse agonist
1408	11.32	cp	BRD-K28806945	L-750667	Dopamine receptor antagonist
1411	11.21	cp	BRD-K74236984	UNC-0321	Histone lysine methyltransferase inhibitor
1413	11.19	cp	BRD-K41410256	balsalazide	Cyclooxygenase inhibitor
1416	11.12	cp	BRD-K51671335	sulpiride	Dopamine receptor antagonist
1417	11.12	cp	BRD-A10715913	sulpiride	Dopamine receptor antagonist
1421	11.07	cp	BRD-A19195498	trimipramine	Norepinephrine reuptake inhibitor
1423	10.95	cp	BRD-K14807180	SB-221284	Serotonin receptor antagonist
1428	10.91	cp	BRD-A09094913	strychnine	Acetylcholine receptor antagonist
1429	10.89	cp	BRD-K82823804	SA-792987	PKC inhibitor
1430	10.88	cp	BRD-K65146499	nabumetone	Cyclooxygenase inhibitor
1432	10.85	cp	BRD-K46441700	GR-55562	Serotonin receptor antagonist
1434	10.84	cp	BRD-K56429665	calcipotriol	Vitamin D receptor agonist
1444	10.65	cp	BRD-K34014345	naproxol	Anti-inflammatory
1448	10.56	cp	BRD-K54095730	CMPD-1	p38 MAPK inhibitor
1450	10.48	cp	BRD-K17953061	staurosporine	PKC inhibitor
1451	10.47	cp	BRD-A84702196	penicillin	Bacterial cell wall synthesis inhibitor
1454	10.42	cp	BRD-K96037667	norethindrone	Progesterone receptor agonist
1456	10.39	cp	BRD-A85587465	bemesetron	Serotonin receptor antagonist
1457	10.38	cp	BRD-K11129031	gemfibrozil	Lipoprotein lipase activator
1458	10.36	cp	BRD-A11702965	chromomycin-a3	DNA binding agent
1461	10.32	cp	BRD-A72441487	stiripentol	GABA uptake inhibitor
1462	10.32	cp	BRD-K32330832	VER-155008	HSP inhibitor
1464	10.26	cp	BRD-K33211335	dextromethorphan	Glutamate receptor antagonist
1466	10.25	cp	BRD-K38615104	A-443644	AKT inhibitor
1467	10.23	cp	BRD-K13646352	midostaurin	FLT3 inhibitor
1469	10.21	cp	BRD-A09467419	mebeverine	Acetylcholine receptor antagonist
1474	10.15	cp	BRD-A36707673	hydroxycholesterol	LXR agonist
1481	10.07	cp	BRD-K22010301	JLK-6	Gamma secretase inhibitor
1482	10.04	cp	BRD-A41555725	chlortetracycline	Protein synthesis inhibitor
1484	9.95	cp	BRD-K73290745	ICI-199441	Opioid receptor agonist
1485	9.94	cp	BRD-K34154330	tracazolate	GABA receptor modulator
1487	9.93	cp	BRD-K76587808	fraxetin	Antioxidant
1488	9.9	cp	BRD-M40783228	mesna	Antioxidant
1489	9.9	cp	BRD-A47494775	dipivefrine	Adrenergic receptor agonist
1490	9.89	cp	BRD-K95435023	PHA-665752	c-Met inhibitor
1495	9.84	cp	BRD-K88679075	methandriol	Androgenic steroid
1500	9.73	cp	BRD-K91145395	prostratin	PKC activator
1502	9.71	cp	BRD-A70268693	PG-9	Acetylcholine receptor agonist
1505	9.69	cp	BRD-A19053259	pseudopelletierine	Anthelmintic
1506	9.69	cp	BRD-K99029477	prometon	Photosynthesis inhibitor
1507	9.68	cp	BRD-K77286328	reversine	Aurora kinase inhibitor
1508	9.66	cp	BRD-K85090592	pilocarpine	Acetylcholine receptor agonist
1511	9.6	cp	BRD-K69195780	NAN-190	Serotonin receptor agonist
1512	9.6	cp	BRD-K51313569	palbociclib	CDK inhibitor
1514	9.58	cp	BRD-K63343048	orlistat	Lipase inhibitor
1515	9.58	cp	BRD-K65285700	BRD-K65285700	Cannabinoid receptor agonist
1517	9.55	cp	BRD-K71003802	hippeastrine	Plant alkaloid
1518	9.53	cp	BRD-A96107863	nisoldipine	Calcium channel blocker
1522	9.5	cp	BRD-K21853356	RG-14620	EGFR inhibitor
1523	9.49	cp	BRD-A53077924	tianeptine	Selective serotonin reuptake enhancer (SSRE)
1524	9.47	cp	BRD-K86204871	terconazole	Sterol demethylase inhibitor
1527	9.4	cp	BRD-A42423104	benproperine	Antitussive
1531	9.33	cp	BRD-K84895041	BMY-45778	IP1 prostacyclin receptor agonist
1535	9.31	cp	BRD-K67847053	guanabenz	Adrenergic receptor agonist
1538	9.28	cp	BRD-K32526544	DCEBIO	Potassium channel activator
1539	9.25	cp	BRD-K60038276	irbesartan	Angiotensin receptor antagonist
1541	9.23	cp	BRD-K32830106	guanfacine	Adrenergic receptor agonist
1542	9.2	cp	BRD-M00539986	formoterol	Adrenergic receptor agonist
1544	9.17	cp	BRD-K25311561	KU-55933	ATM kinase inhibitor
1545	9.16	cp	BRD-A15435692	BMY-14802	Sigma receptor antagonist
1547	9.15	cp	BRD-K22031190	diflunisal	Prostanoid receptor antagonist
1551	9.09	cp	BRD-A35033682	eriodictyol	Cytochrome P450 inhibitor
1553	9.09	cp	BRD-K55044200	amoxicillin	Penicillin binding protein inhibitor
1555	9.06	cp	BRD-K96402602	farnesylthiotriazole	PPMTase inhibitor
1557	9.01	cp	BRD-K07403598	CAY-10470	NFkB pathway inhibitor
1558	8.95	cp	BRD-K81225797	SCH-58261	Adenosine receptor antagonist
1560	8.94	cp	BRD-A00758722	noretynodrel	Progestogen hormone
1561	8.91	cp	BRD-K18194590	mephentermine	Adrenergic receptor agonist
1562	8.89	cp	BRD-A42553870	L-152804	Neuropeptide receptor antagonist
1564	8.84	cp	BRD-K83637872	SANT-1	Smoothened receptor antagonist
1567	8.77	cp	BRD-K18523449	mestanolone	Androgenic steroid
1569	8.73	cp	BRD-K23369905	oxiconazole	Bacterial cell wall synthesis inhibitor
1570	8.72	cp	BRD-K50891186	GR-103691	Dopamine receptor antagonist
1572	8.68	cp	BRD-K68246049	TTNPB	Retinoid receptor agonist
1574	8.67	cp	BRD-A37837077	cyclazosin	Adrenergic receptor antagonist
1579	8.61	cp	BRD-A15131297	benazepril	ACE inhibitor
1580	8.59	cp	BRD-A98283014	calmidazolium	Calcium channel blocker
1589	8.52	cp	BRD-K81847782	scandenin	Plant compound with antimicrobial activity
1592	8.5	cp	BRD-K79877282	PF-543	Sphingosine kinase inhibitor
1593	8.5	cp	BRD-K42142750	retrorsine	Antimitotic
1594	8.49	cp	BRD-A88254928	salbutamol	Adrenergic receptor agonist
1595	8.47	cp	BRD-A68589262	troxipide	Glucosamine synthetase stimulant
1596	8.47	cp	BRD-K40992116	parachlorophenol	Anti-infective
1599	8.42	cp	BRD-A93206962	L-755507	Adrenergic receptor agonist
1601	8.37	cp	BRD-K48300629	zonisamide	Sodium channel blocker
1602	8.34	cp	BRD-K27665173	D-64406	PDGFR receptor inhibitor
1607	8.25	cp	BRD-K15086322	JNJ-10191584	Histamine receptor antagonist
1609	8.21	cp	BRD-K89375097	pirenzepine	Acetylcholine receptor antagonist
1612	8.18	cp	BRD-K88304388	dextrorphan	Glutamate receptor antagonist
1613	8.17	cp	BRD-A58564983	selamectin	Nematocide
1617	8.06	cp	BRD-K06543683	bisindolylmaleimide-ix	CDK inhibitor
1619	8.06	cp	BRD-K93880783	stavudine	DNA directed DNA polymerase inhibitor
1620	8.04	cp	BRD-K96471533	nitazoxanide	Pyruvate ferredoxin oxidoreductase inhibitor
1621	8.03	cp	BRD-K29582115	ziprasidone	Dopamine receptor antagonist
1623	7.96	cp	BRD-K94144010	cotinine	Nicotine metabolite
1624	7.96	cp	BRD-K50422030	clomethiazole	GABA receptor antagonist
1625	7.95	cp	BRD-K30563334	rifabutin	Protein synthesis inhibitor
1631	7.88	cp	BRD-K70358946	aripiprazole	Serotonin receptor agonist
1634	7.79	cp	BRD-K00662280	CL-218872	GABA receptor agonist
1638	7.74	cp	BRD-K31611373	fluprostenol	Prostanoid receptor agonist
1644	7.7	cp	BRD-K38449220	seneciphylline	Cytochrome P450 inhibitor
1645	7.69	cp	BRD-K92870997	pterostilbene	Cyclooxygenase inhibitor
1646	7.69	cp	BRD-K97752965	nicorandil	Nitric oxide donor
1647	7.65	cp	BRD-K26674531	GR-235	Estrogen receptor agonist
1649	7.61	cp	BRD-K41567364	SB-334867	Orexin receptor antagonist
1650	7.59	cp	BRD-K32318651	acyclovir	DNA polymerase inhibitor
1651	7.56	cp	BRD-K30867024	SB-216641	Serotonin receptor antagonist
1656	7.52	cp	BRD-A45543382	metrizamide	Radiopaque medium
1657	7.51	cp	BRD-K93460210	lamotrigine	Serotonin receptor antagonist
1659	7.5	cp	BRD-A78322124	dobutamine	Adrenergic receptor agonist
1660	7.48	cp	BRD-K67352070	TC-2559	Acetylcholine receptor agonist
1662	7.47	cp	BRD-A70649075	sulconazole	Sterol demethylase inhibitor
1666	7.39	cp	BRD-K11636097	JNJ-7706621	CDK inhibitor
1668	7.38	cp	BRD-K83144676	olmesartan	Angiotensin antagonist
1670	7.36	cp	BRD-K91290917	amodiaquine	Histamine receptor agonist
1674	7.33	cp	BRD-K79684402	RO-10-5824	Dopamine receptor agonist
1680	7.22	cp	BRD-K93918653	quizartinib	FLT3 inhibitor
1681	7.19	cp	BRD-K30649484	mafenide	Carbonic anhydrase inhibitor
1684	7.16	cp	BRD-K13642330	cosmosiin	Cytochrome P450 inhibitor
1687	7.13	cp	BRD-A51182606	chloramphenicol	Protein synthesis inhibitor
1693	7.07	cp	BRD-A60245366	AS-601245	JNK inhibitor
1695	7.06	cp	BRD-K20995441	U-54494A	Opioid receptor agonist
1698	7.01	cp	BRD-K57930253	nitrazepam	Benzodiazepine receptor agonist
1701	7	cp	BRD-A47513740	calyculin	Protein phosphatase inhibitor
1702	6.99	cp	BRD-K74305673	IKK-2-inhibitor-V	IKK inhibitor
1704	6.98	cp	BRD-K40175214	torin-1	MTOR inhibitor
1708	6.94	cp	BRD-A50311610	meclozine	CAR agonist
1710	6.9	cp	BRD-K83972459	JWE-035	Aurora kinase inhibitor
1727	6.68	cp	BRD-K19796430	erismodegib	Smoothened receptor antagonist
1732	6.65	cp	BRD-A66199457	asiaticoside	Antineoplastic
1739	6.56	cp	BRD-K94919853	10H-phenothiazin-10-yl)(p-tolyl)methanone	Butyrylcholinesterase inhibitor
1740	6.55	cp	BRD-A74771556	nikkomycin	Chitin inhibitor
1743	6.52	cp	BRD-K62736196	guanabenz	-666
1745	6.51	cp	BRD-A95869247	indapamide	Thiazide diuretic
1746	6.5	cp	BRD-A39052811	mosapride	Serotonin receptor agonist
1748	6.49	cp	BRD-K24681473	YM-155	Survivin inhibitor
1751	6.44	cp	BRD-A09722536	cyclophosphamide	DNA alkylating agent
1752	6.43	cp	BRD-K36864847	BD-1047	Adrenergic receptor antagonist
1753	6.41	cp	BRD-K68341547	W-9	Calmodulin antagonist
1757	6.34	cp	BRD-K93433262	alfacalcidol	Vitamin D receptor agonist
1760	6.31	cp	BRD-K62363391	dapsone	Bacterial antifolate
1764	6.27	cp	BRD-K28296557	AKT-inhibitor-IV	AKT inhibitor
1767	6.24	cp	BRD-K15108141	gemcitabine	Ribonucleotide reductase inhibitor
1770	6.21	cp	BRD-K55301415	abiraterone	17,20 lyase inhibitor
1771	6.2	cp	BRD-K95763993	trapidil	PDGFR receptor inhibitor
1778	6.15	cp	BRD-K11927976	ER-27319	Mediator release inhibitor
1780	6.13	cp	BRD-K87049188	fusaric-acid	Dopamine beta hydroxylase inhibitor
1784	6.09	cp	BRD-A37347161	BRL-52537	Opioid receptor agonist
1785	6.08	cp	BRD-K43236057	piceid	ICAM1 inhibitor
1788	6.06	cp	BRD-A62809825	thapsigargin	ATPase inhibitor
1793	5.99	cp	BRD-K32755366	reserpic-acid	Norepinephrine transporter inhibitor
1794	5.99	cp	BRD-K83010055	VU-0415374-1	Glutamate receptor modulator
1795	5.98	cp	BRD-A41145729	methoprene-acid	Retinoid receptor agonist
1796	5.97	cp	BRD-K28137194	loreclezole	GABA receptor agonist
1797	5.95	cp	BRD-K25310650	ormetoprim	Bacterial antifolate
1799	5.93	cp	BRD-K02590140	O-2050	Cannabinoid receptor antagonist
1805	5.88	cp	BRD-K05181084	NGB-2904	Dopamine receptor antagonist
1806	5.88	cp	BRD-K13544237	r(-)-propylnorapomorphine	Dopamine receptor agonist
1807	5.81	cp	BRD-K48029790	OBAA	Phospholipase inhibitor
1809	5.8	cp	BRD-K54411430	robustic-acid	cAMP inhibitor
1812	5.77	cp	BRD-K05804044	AZ-628	RAF inhibitor
1821	5.71	cp	BRD-A46393198	tetramisole	Immunostimulant
1824	5.67	cp	BRD-K54704028	BAY-36-7620	Glutamate receptor antagonist
1834	5.51	cp	BRD-K15600710	obatoclax	BCL inhibitor
1841	5.43	cp	BRD-K48935217	epothilone	Microtubule inhibitor
1844	5.41	cp	BRD-K75641298	metoclopramide	Dopamine receptor antagonist
1847	5.39	cp	BRD-K30743633	TCPOBOP	CAR agonist
1852	5.38	cp	BRD-K26801045	pipamperone	Dopamine receptor antagonist
1857	5.29	cp	BRD-K02950022	BMS-299897	Gamma secretase inhibitor
1859	5.28	cp	BRD-K75532464	FTI-276	Farnesyltransferase inhibitor
1860	5.25	cp	BRD-K39391626	ethylestrenol	Progesterone receptor agonist
1865	5.23	cp	BRD-K76775527	nimesulide	Cyclooxygenase inhibitor
1868	5.16	cp	BRD-K08554278	bisbenzimide	DNA binding agent
1871	5.15	cp	BRD-K92760278	riboflavin	Vitamin B
1873	5.12	cp	BRD-K36737713	AG-957	Protein tyrosine kinase inhibitor
1874	5.11	cp	BRD-U82589721	HG-5-113-01	Protein kinase inhibitor
1877	5.07	cp	BRD-K15402119	huperzine-a	Acetylcholinesterase inhibitor
1878	5.07	cp	BRD-K68190965	GR-46611	Serotonin receptor agonist
1883	5.05	cp	BRD-A34208323	VU-0404997-2	Glutamate receptor modulator
1884	5.04	cp	BRD-K49328571	dasatinib	BCR-ABL kinase inhibitor
1886	5	cp	BRD-K07220430	cinnarizine	Calcium channel blocker
1888	4.97	cp	BRD-K07212038	selinidin	Mast cell stabilizer
1895	4.91	cp	BRD-A92161634	scopoline	Acetylcholine receptor antagonist
1896	4.89	cp	BRD-K67783091	haloperidol	Dopamine receptor antagonist
1897	4.88	cp	BRD-K37561857	zardaverine	Phosphodiesterase inhibitor
1898	4.87	cp	BRD-K62858456	lomerizine	Calcium channel blocker
1904	4.83	cp	BRD-A25067867	benzatropine	Acetylcholine receptor antagonist
1910	4.75	cp	BRD-A20239487	atenolol	Adrenergic receptor antagonist
1915	4.69	cp	BRD-A03216249	mepivacaine	Potassium channel blocker
1918	4.66	cp	BRD-A81866333	CGS-21680	Adenosine receptor agonist
1923	4.59	cp	BRD-K50214219	CS-1657	PARP inhibitor
1925	4.56	cp	BRD-K27450477	EHNA	Adenosine deaminase inhibitor
1926	4.56	cp	BRD-K13571841	pepstatin	Aspartic protease inhibitor
1927	4.55	cp	BRD-K09132007	D-4476	TGF beta receptor inhibitor
1935	4.51	cp	BRD-A69512159	carbidopa	Aromatic L-amino acid decarboxylase inhibitor
1936	4.5	cp	BRD-A06352418	terfenadine	Histamine receptor antagonist
1938	4.47	cp	BRD-K18619710	digoxigenin	Steroid
1940	4.47	cp	BRD-A30435184	metergoline	Dopamine receptor agonist
1946	4.4	cp	BRD-K19533706	tranilast	Angiogenesis inhibitor
1949	4.37	cp	BRD-K34415467	trimethobenzamide	Histamine receptor antagonist
1953	4.32	cp	BRD-K06792661	narciclasine	Coflilin signaling pathway activator
1962	4.23	cp	BRD-U86922168	QL-XII-47	BTK inhibitor
1963	4.22	cp	BRD-A83237092	fulvestrant	Estrogen receptor antagonist
1965	4.22	cp	BRD-K49810818	sorafenib	FLT3 inhibitor
1971	4.2	cp	BRD-K44067360	flufenamic-acid	Chloride channel blocker
1974	4.17	cp	BRD-K49481516	galantamine	Acetylcholinesterase inhibitor
1975	4.16	cp	BRD-A01593789	chlormadinone	5-alpha reductase inhibitor
1978	4.12	cp	BRD-K67017579	cilostazol	Phosphodiesterase inhibitor
1984	4.08	cp	BRD-K13926615	vardenafil	Phosphodiesterase inhibitor
1985	4.08	cp	BRD-K04111260	raclopride	Dopamine receptor antagonist
1996	4.02	cp	BRD-K04548931	pidorubicine	Topoisomerase inhibitor
2000	4	cp	BRD-K40965114	cyanopindolol	Adrenergic receptor antagonist
2003	3.95	cp	BRD-K09537769	NU-7026	DNA dependent protein kinase inhibitor
2010	3.91	cp	BRD-K44084986	Y-27632	Rho associated kinase inhibitor
2011	3.9	cp	BRD-A41519720	ezetimibe	Niemann-Pick C1-like 1 protein antagonist
2015	3.88	cp	BRD-A22684332	procaterol	Adrenergic receptor agonist
2016	3.88	cp	BRD-K57718010	pentylenetetrazol	GABA receptor antagonist
2022	3.84	cp	BRD-K33204703	AG-370	PDGFR receptor inhibitor
2023	3.83	cp	BRD-A37492983	iocetamic-acid	Radiopaque medium
2027	3.81	cp	BRD-K45401373	betulinic-acid	Apoptosis stimulant
2029	3.78	cp	BRD-A72703248	SKF-96365	Calcium channel blocker
2033	3.74	cp	BRD-A13807286	HA-14-1	BCL inhibitor
2034	3.74	cp	BRD-A00520476	otenzepad	Acetylcholine receptor antagonist
2038	3.71	cp	BRD-A52660433	tetrindole	Monoamine oxidase inhibitor
2040	3.7	cp	BRD-K51941867	LM-1685	Cyclooxygenase inhibitor
2047	3.66	cp	BRD-K77695569	tiabendazole	Angiogenesis inhibitor
2048	3.66	cp	BRD-K47679368	bromfenac	Cyclooxygenase inhibitor
2052	3.63	cp	BRD-A04668240	CGP-52432	GABA receptor antagonist
2053	3.62	cp	BRD-K35128472	2-aminopurine	Serine/threonine kinase inhibitor
2057	3.6	cp	BRD-K56064827	EI-273	PKC inhibitor
2058	3.59	cp	BRD-A59808129	guggulsterone	Cholesterol inhibitor
2059	3.59	cp	BRD-A92630576	trimebutine	Opioid receptor agonist
2065	3.56	cp	BRD-A57382968	piroxicam	Cyclooxygenase inhibitor
2069	3.52	cp	BRD-A41833852	naloxone	Opioid receptor antagonist
2071	3.49	cp	BRD-K70401845	erlotinib	EGFR inhibitor
2075	3.45	cp	BRD-K44497846	enalapril	ACE inhibitor
2080	3.42	cp	BRD-K52735702	cefdinir	Bacterial cell wall synthesis inhibitor
2081	3.42	cp	BRD-A63546914	RO-04-5595	Glutamate receptor antagonist
2082	3.42	cp	BRD-K53220666	trimetozine	Sedative
2087	3.39	cp	BRD-K40255344	tyrphostin-A9	Protein tyrosine kinase inhibitor
2089	3.38	cp	BRD-K93618743	ipriflavone	Bone resorption inhibitor
2091	3.35	cp	BRD-K86958018	olvanil	TRPV agonist
2094	3.31	cp	BRD-K11163873	phenanthridone	PARP inhibitor
2095	3.31	cp	BRD-K52989797	clomipramine	Serotonin transporter inhibitor (SERT)
2101	3.28	cp	BRD-K28667793	pyrazinamide	Fatty acid synthase inhibitor
2102	3.28	cp	BRD-K18574842	nafcillin	Bacterial cell wall synthesis inhibitor
2109	3.24	cp	BRD-K96799727	pifithrin-mu	HSP inhibitor
2113	3.21	cp	BRD-K85985071	ellipticine	Topoisomerase inhibitor
2114	3.21	cp	BRD-A78877355	nefopam	Cyclooxygenase inhibitor
2119	3.17	cp	BRD-K59256312	gabexate	Serine protease inhibitor
2125	3.14	cp	BRD-K25079130	avrainvillamide-analog-4	nucleophosmin inhibitor
2126	3.14	cp	BRD-K89014967	AS-703026	MEK inhibitor
2127	3.14	cp	BRD-K47323024	methapyrilene	Histamine receptor antagonist
2132	3.1	cp	BRD-K84566043	fenpiverinium	Acetylcholine receptor antagonist
2133	3.1	cp	BRD-A35519318	benidipine	Calcium channel blocker
2134	3.1	cp	BRD-K94294671	OSI-027	MTOR inhibitor
2135	3.1	cp	BRD-K91699951	benzonatate	Local anesthetic
2136	3.09	cp	BRD-K59574735	ubenimex	Leukotriene inhibitor
2139	3.07	cp	BRD-M30523314	vinorelbine	Tubulin inhibitor
2140	3.07	cp	BRD-K54094468	remoxipride	Dopamine receptor antagonist
2142	3.03	cp	BRD-K90733503	cefalexin	Bacterial cell wall synthesis inhibitor
2143	3.03	cp	BRD-K65910366	KUC103904N	-666
2144	3.03	cp	BRD-A27887842	prednisolone	Glucocorticoid receptor agonist
2145	3.03	cp	BRD-A17535965	gelsemine	Acetylcholine receptor antagonist
2148	3.03	cp	BRD-K50387473	XMD-892	MAP kinase inhibitor
2153	3	cp	BRD-K14965640	ibuprofen	Cyclooxygenase inhibitor
2158	2.96	cp	BRD-K21283037	riluzole	Glutamate inhibitor
2159	2.96	cp	BRD-K26241953	piceatannol	SYK inhibitor
2166	2.92	cp	BRD-M72442222	vicriviroc	CC chemokine receptor antagonist
2167	2.92	cp	BRD-K13514097	everolimus	MTOR inhibitor
2168	2.92	cp	BRD-A61856038	tremulacin	Lipoxygenase inhibitor
2169	2.92	cp	BRD-K78599730	manumycin-a	Farnesyltransferase inhibitor
2172	2.92	cp	BRD-K79254416	decitabine	DNA methyltransferase inhibitor
2179	2.89	cp	BRD-K32247306	primidone	GABA receptor antagonist
2180	2.89	cp	BRD-A64479082	quinidine	Sodium channel blocker
2181	2.88	cp	BRD-K52397688	amperozide	Dopamine receptor antagonist
2185	2.85	cp	BRD-K43764301	dexketoprofen	Cyclooxygenase inhibitor
2186	2.85	cp	BRD-K17743125	belinostat	HDAC inhibitor
2192	2.82	cp	BRD-K45068323	W-13	Calmodulin antagonist
2198	2.78	cp	BRD-K51967704	BIIB021	HSP inhibitor
2199	2.77	cp	BRD-A91452556	estradiol-cypionate	Estrogen receptor agonist
2204	2.75	cp	BRD-K53123955	niridazole	Phosphofructokinase inhibitor
2215	2.68	cp	BRD-K14765469	vesamicol	Acetylcholinesterase inhibitor
2218	2.68	cp	BRD-A09925278	etilefrine	Adrenergic receptor agonist
2220	2.67	cp	BRD-K23922020	arecaidine	Acetylcholine receptor agonist
2221	2.67	cp	BRD-A42571354	cetirizine	Histamine receptor antagonist
2226	2.64	cp	BRD-A81402010	KU-C103443N	CDC inhibitor
2228	2.63	cp	BRD-K67100011	pivmecillinam	Bacterial cell wall synthesis inhibitor
2230	2.61	cp	BRD-K36627727	tamibarotene	Retinoid receptor agonist
2231	2.61	cp	BRD-A99449986	MT-21	Caspase activator
2242	2.54	cp	BRD-K07762753	aminopurvalanol-a	Tyrosine kinase inhibitor
2245	2.5	cp	BRD-A84389633	tropanyl-3,5-dimethylbenzoate	Serotonin receptor antagonist
2246	2.5	cp	BRD-A62057054	MDL-11939	Serotonin receptor antagonist
2254	2.47	cp	BRD-K95921201	reserpine	Vesicular monoamine transporter inhibitor
2261	2.45	cp	BRD-A39230911	chlorphensin	Muscle relaxant
2262	2.44	cp	BRD-M41783010	acamprosate	Glutamate receptor antagonist
2263	2.43	cp	BRD-A48570745	ivermectin	GABA receptor agonist
2264	2.43	cp	BRD-K09497549	kawain	Calcium channel modulator
2265	2.43	cp	BRD-K30020243	aliskiren	Antihypertensive
2266	2.43	cp	BRD-K66788707	fludarabine	DNA synthesis inhibitor
2271	2.4	cp	BRD-K56745457	azauridine	Antiviral
2272	2.4	cp	BRD-A49765801	fludroxycortide	Glucocorticoid receptor agonist
2276	2.36	cp	BRD-A14208071	oxyphenonium	Cholinergic receptor antagonist
2277	2.36	cp	BRD-K37516142	idebenone	Calcium channel modulator
2278	2.36	cp	BRD-K01902415	pirinixic-acid	PPAR receptor agonist
2279	2.36	cp	BRD-K03319035	maprotiline	Norepinephrine reuptake inhibitor
2280	2.36	cp	BRD-A65440446	cimaterol	Adrenergic receptor agonist
2281	2.36	cp	BRD-K50140147	NVP-TAE684	ALK inhibitor
2282	2.34	cp	BRD-K94832621	Y-134	Estrogen receptor antagonist
2283	2.33	cp	BRD-K28029915	dolasetron	Serotonin receptor antagonist
2284	2.33	cp	BRD-K41707108	ceramide	Phosphoenolpyruvate carboxylase activator
2286	2.33	cp	BRD-K00627859	tubastatin-a	HDAC inhibitor
2287	2.33	cp	BRD-K45117373	Y-26763	Potassium channel activator
2291	2.29	cp	BRD-K10860596	granisetron	Serotonin receptor antagonist
2292	2.29	cp	BRD-K60623809	SU-11652	Tyrosine kinase inhibitor
2294	2.29	cp	BRD-K93280214	gabazine	GABA receptor antagonist
2299	2.26	cp	BRD-A72711497	lasalocid	Bacterial permeability inducer
2302	2.24	cp	BRD-K82846253	repaglinide	Insulin secretagogue
2305	2.22	cp	BRD-K98684188	GSK-0660	PPAR receptor antagonist
2308	2.21	cp	BRD-K06221026	DUP-697	Cyclooxygenase inhibitor
2314	2.19	cp	BRD-K17306061	aprepitant	Tachykinin antagonist
2317	2.18	cp	BRD-K70577657	H-9	PKA inhibitor
2318	2.18	cp	BRD-A84389091	L-655708	GABA receptor inverse agonist
2322	2.18	cp	BRD-K56001384	antimycin-a	ATP synthase inhibitor
2332	2.15	cp	BRD-K14681867	somatostatin	Somatostatin receptor agonist
2333	2.15	cp	BRD-K12867552	THM-I-94	HDAC inhibitor
2342	2.11	cp	BRD-A15034104	bergenin	Interleukin inhibitor
2344	2.08	cp	BRD-K18678457	ZD-7288	HCN channel blocker
2345	2.08	cp	BRD-A28422058	L-689560	Glutamate receptor antagonist
2356	2.04	cp	BRD-K96271548	coumaric-acid	Antioxidant
2357	2.04	cp	BRD-K08556791	ethoprop	Acetylcholinesterase inhibitor
2360	2.03	cp	BRD-K14880289	GW-501516	PPAR receptor agonist
2362	2.01	cp	BRD-K11853856	PJ-34	PARP inhibitor
2367	1.98	cp	BRD-K26521938	dinoprostone	Prostanoid receptor agonist
2369	1.97	cp	BRD-K47539947	tetradecylthioacetic-acid	Lipid peroxidase inhibitor
2374	1.94	cp	BRD-K59962020	CHEMBL-374350	NFkB pathway inhibitor
2375	1.94	cp	BRD-A32836748	leu-enkephalin	Opioid receptor agonist
2377	1.93	cp	BRD-K80315159	DPPE	Histamine receptor antagonist
2379	1.91	cp	BRD-A22256192	terazosin	Adrenergic receptor antagonist
2383	1.9	cp	BRD-K70490179	rimcazole	Sigma receptor antagonist
2384	1.9	cp	BRD-K07507905	BRL-37344	Adrenergic receptor agonist
2395	1.87	cp	BRD-A05352148	ipratropium	Acetylcholine receptor antagonist
2396	1.87	cp	BRD-K05396879	15-delta-prostaglandin-j2	PPAR receptor agonist
2398	1.86	cp	BRD-K06388322	pramipexole	Dopamine receptor agonist
2404	1.85	cp	BRD-K15935639	z-leu3-VS	Proteasome inhibitor
2406	1.84	cp	BRD-K76274772	MAPP-D-erythro	Ceramidase inhibitor
2410	1.83	cp	BRD-K61217870	n-(3-acetamidophenyl)-3-chlorobenzamide	Glutamate receptor antagonist
2411	1.83	cp	BRD-A77722753	hydralazine	Vasodilator
2412	1.83	cp	BRD-K56558538	ambroxol	Sodium channel blocker
2413	1.83	cp	BRD-K65417056	meprylcaine	Local anesthetic
2414	1.83	cp	BRD-K06080977	eicosatetraynoic-acid	Cyclooxygenase inhibitor
2415	1.82	cp	BRD-A94669766	naringenin	Aromatase inhibitor
2423	1.76	cp	BRD-A29901043	KIN001-127	ITK inhibitor
2427	1.73	cp	BRD-A04327189	synephrine	Adrenergic receptor agonist
2428	1.73	cp	BRD-A41250306	cyclopenthiazide	Thiazide diuretic
2429	1.73	cp	BRD-A78942461	ICI-118551	Adrenergic receptor antagonist
2440	1.7	cp	BRD-A18202423	CPCCOEt	Glutamate receptor antagonist
2441	1.7	cp	BRD-K32828673	chelidonine	Tubulin inhibitor
2443	1.69	cp	BRD-K04414442	SB-222200	Tachykinin antagonist
2444	1.69	cp	BRD-K25906698	immepip	Histamine receptor agonist
2445	1.69	cp	BRD-K47150025	KI-8751	VEGFR inhibitor
2446	1.69	cp	BRD-K59369769	tozasertib	Aurora kinase inhibitor
2453	1.66	cp	BRD-A49046702	SKF-89976A	GABA uptake inhibitor
2454	1.66	cp	BRD-K43860855	iobenguane	Antineoplastic
2455	1.66	cp	BRD-A76093993	cromakalim	Potassium channel activator
2456	1.66	cp	BRD-A02713983	dihydrodeoxygedunin	Growth factor receptor activator
2458	1.66	cp	BRD-K16478699	PLX-4720	RAF inhibitor
2466	1.62	cp	BRD-K85242180	beta-CCP	Indoleamine 2,3-dioxygenase inhibitor
2475	1.59	cp	BRD-K31238592	devazepide	CCK receptor antagonist
2476	1.59	cp	BRD-A22844106	tenoxicam	Cyclooxygenase inhibitor
2481	1.55	cp	BRD-A67748489	K3644	Kinesin-like spindle protein inhibitor
2482	1.55	cp	BRD-A30437061	camptothecin	Topoisomerase inhibitor
2483	1.55	cp	BRD-K96263742	GW-7647	PPAR receptor agonist
2484	1.55	cp	BRD-A36066264	estradiol-benzoate	Estrogen receptor agonist
2487	1.55	cp	BRD-K22662435	ganciclovir	DNA polymerase inhibitor
2498	1.48	cp	BRD-K29359156	ebselen	H+/K+-ATPase inhibitor
2499	1.48	cp	BRD-K06467078	corynanthine	Adrenergic receptor antagonist
2500	1.48	cp	BRD-A14966924	alaproclate	Serotonin receptor antagonist
2504	1.48	cp	BRD-K79145749	dibenzepin	Norepinephrine reuptake inhibitor
2507	1.46	cp	BRD-K73991644	isoquercetin	Aldose reductase inhibitor
2508	1.45	cp	BRD-K22878149	SB-205607	Delta 1 opioid receptor agonist
2513	1.43	cp	BRD-K29582677	flunarizine	Calcium channel blocker
2514	1.42	cp	BRD-K51575138	TPCA-1	IKK inhibitor
2515	1.41	cp	BRD-K30189597	SYK-inhibitor	SYK inhibitor
2516	1.41	cp	BRD-K10843433	phenylbutazone	Cyclooxygenase inhibitor
2517	1.41	cp	BRD-K54142781	cirazoline	Adrenergic receptor agonist
2518	1.41	cp	BRD-K44849676	capsazepine	TRPV agonist
2519	1.41	cp	BRD-K75958195	pizotifen	Serotonin receptor antagonist
2525	1.37	cp	BRD-A02990301	lofexidine	Adrenergic receptor agonist
2526	1.37	cp	BRD-K00959089	thenoyltrifluoroacetone	Chelating agent
2527	1.37	cp	BRD-K87990216	piretanide	Glucocorticoid receptor agonist
2530	1.37	cp	BRD-K52313696	tacedinaline	HDAC inhibitor
2531	1.37	cp	BRD-K63979671	etifenin	Compound used in hepatobiliary scans of the liver
2532	1.36	cp	BRD-K40758068	efavirenz	HIV protease inhibitor
2534	1.34	cp	BRD-K31792052	pifithrin	Interleukin receptor antagonist
2544	1.3	cp	BRD-K32744045	disulfiram	Aldehyde dehydrogenase inhibitor
2548	1.3	cp	BRD-K81128206	edrophonium	Acetylcholinesterase inhibitor
2550	1.28	cp	BRD-K26117720	gingerol	Nitric oxide synthase inhibitor
2551	1.27	cp	BRD-A76279427	myriocin	Serine palmitoyltransferase inhibitor
2553	1.27	cp	BRD-K71289571	zafirlukast	Leukotriene receptor antagonist
2561	1.23	cp	BRD-K01493881	apigenin	Casein kinase inhibitor
2562	1.23	cp	BRD-K32412559	morphothebaine	Adrenergic receptor antagonist
2563	1.23	cp	BRD-K52721684	PCO-400	Potassium channel activator
2564	1.23	cp	BRD-A14798026	mestranol	Estrogen receptor agonist
2565	1.23	cp	BRD-K36258877	AZ-10417808	Caspase inhibitor
2566	1.23	cp	BRD-K70330367	amantadine	Glutamate receptor antagonist
2567	1.23	cp	BRD-A68039575	liquiritigenin	Aromatase inhibitor
2569	1.2	cp	BRD-A82590476	SDZ-NKT-343	Tachykinin antagonist
2570	1.2	cp	BRD-K21667562	AM-404	Cyclooxygenase inhibitor
2573	1.2	cp	BRD-A44008656	doxylamine	Histamine receptor antagonist
2574	1.2	cp	BRD-K76723084	isotretinoin	Retinoid receptor agonist
2575	1.2	cp	BRD-K92000912	AM-251	Cannabinoid receptor antagonist
2583	1.16	cp	BRD-K80970344	pyrrolidine-dithiocarbamate	NFkB pathway inhibitor
2584	1.16	cp	BRD-K40656405	L-165041	PPAR receptor agonist
2585	1.16	cp	BRD-K04185004	oxybuprocaine	Local anesthetic
2591	1.16	cp	BRD-K81272440	dantrolene	Calcium channel blocker
2592	1.16	cp	BRD-A19500257	geldanamycin	HSP inhibitor
2593	1.14	cp	BRD-K78838262	austricine	Hypolipidemic
2594	1.13	cp	BRD-A29289453	PCA-4248	Platelet activating factor receptor antagonist
2595	1.13	cp	BRD-A50928468	norgestrel	Progesterone receptor agonist
2596	1.13	cp	BRD-K68336408	tyrphostin-AG-1478	EGFR inhibitor
2597	1.13	cp	BRD-K03557653	sappanone-a	Tyrosinase inhibitor
2598	1.13	cp	BRD-K02581333	protein-tyrosine-phosphatase-inhibitor-IV	Tyrosine phosphatase inhibitor
2604	1.12	cp	BRD-A39172021	ampiroxicam	Cyclooxygenase inhibitor
2608	1.09	cp	BRD-A68631409	evodiamine	ATPase inhibitor
2614	1.06	cp	BRD-K53665955	MK-5108	Aurora kinase inhibitor
2616	1.06	cp	BRD-K36153907	KU-C103885	Cystic fibrosis transmembrane conductance regulator inhibitor
2617	1.06	cp	BRD-K80451230	zamifenacin	Acetylcholine receptor antagonist
2618	1.05	cp	BRD-K22227508	targinine	Nitric oxide synthase inhibitor
2620	1.04	cp	BRD-A25775766	securinine	GABA receptor antagonist
2622	1.02	cp	BRD-K81876028	CP-93129	Serotonin receptor agonist
2623	1.02	cp	BRD-K53523901	arctigenin	MEK inhibitor
2624	1.02	cp	BRD-K54233340	dorsomorphin	AMPK inhibitor
2630	0.99	cp	BRD-K67578145	GDC-0879	RAF inhibitor
2631	0.99	cp	BRD-A75935363	atracurium	Acetylcholine receptor antagonist
2632	0.99	cp	BRD-K80396088	gliquidone	Sulfonylurea
2634	0.95	cp	BRD-K62996583	lidoflazine	Calcium channel blocker
2635	0.95	cp	BRD-K24675965	LY-288513	CCK receptor antagonist
2637	0.95	cp	BRD-A75552914	isoxicam	Cyclooxygenase inhibitor
2638	0.93	cp	BRD-K30240666	clemastine	Histamine receptor antagonist
2643	0.92	cp	BRD-K99696746	fatostatin	SREBP inhibitor
2644	0.92	cp	BRD-K40919711	BAPTA-AM	Potassium channel blocker
2645	0.92	cp	BRD-K48722258	dilazep	Adenosine reuptake inhibitor
2649	0.92	cp	BRD-A31521121	methocarbamol	Muscle relaxant
2653	0.88	cp	BRD-K20287671	SU-4312	PDGFR receptor inhibitor
2654	0.88	cp	BRD-A40639672	ketorolac	Cyclooxygenase inhibitor
2655	0.88	cp	BRD-K33308633	INCA-6	Calcineurin inhibitor
2656	0.88	cp	BRD-K02404261	caffeine	Adenosine receptor antagonist
2659	0.88	cp	BRD-K49865102	PD-0325901	MEK inhibitor
2664	0.85	cp	BRD-K81169441	cerivastatin	HMGCR inhibitor
2665	0.85	cp	BRD-K94689771	pinocembrin	CYP1B1 inhibitor
2666	0.85	cp	BRD-K26429091	J-104129	Acetylcholine receptor antagonist
2667	0.85	cp	BRD-K04887706	AKT-inhibitor-1-2	AKT inhibitor
2668	0.85	cp	BRD-A31159102	fluoxetine	Selective serotonin reuptake inhibitor (SSRI)
2669	0.85	cp	BRD-A84481105	thioridazine	Dopamine receptor antagonist
2674	0.81	cp	BRD-K03600606	catechin	Beta secretase inhibitor
2675	0.81	cp	BRD-K17008822	BD-1008	Sigma receptor antagonist
2676	0.81	cp	BRD-A05186015	bupropion	Dopamine uptake inhibitor
2679	0.81	cp	BRD-A18043272	phensuximide	Succinimide antiepileptic
2681	0.8	cp	BRD-K66353228	zoxazolamine	Myorelaxant
2688	0.78	cp	BRD-K28849549	mesalazine	Cyclooxygenase inhibitor
2689	0.78	cp	BRD-K46142322	RS-67333	Serotonin receptor partial agonist
2690	0.78	cp	BRD-K93480852	KN-93	Calcium-calmodulin dependent protein kinase inhibitor
2691	0.78	cp	BRD-K34776109	glimepiride	Insulin secretagogue
2692	0.78	cp	BRD-K08890269	CO-102862	Sodium channel blocker
2693	0.77	cp	BRD-K29458283	chlorambucil	DNA inhibitor
2696	0.74	cp	BRD-K68873215	phosphodiesterase-V-inhibitor-II	Phosphodiesterase inhibitor
2700	0.74	cp	BRD-A09056319	alfuzosin	Adrenergic receptor antagonist
2701	0.74	cp	BRD-K32821942	azathioprine	Dehydrogenase inhibitor
2704	0.7	cp	BRD-K68407802	KIN001-055	EGFR inhibitor
2708	0.68	cp	BRD-A48261811	argatroban	Thrombin inhibitor
2711	0.67	cp	BRD-A41941932	vitexin	Antioxidant
2712	0.67	cp	BRD-A63667919	methylergometrine	Dopamine receptor antagonist
2713	0.67	cp	BRD-K60298136	ITE	Aryl hydrocarbon receptor agonist
2714	0.67	cp	BRD-K83302049	protopine	Histamine receptor antagonist
2715	0.67	cp	BRD-K51677086	erythromycin	NFkB pathway inhibitor
2716	0.67	cp	BRD-K42500029	CGP-57380	MAP kinase inhibitor
2717	0.67	cp	BRD-K47631482	bromhexine	Mucolytic agent
2718	0.67	cp	BRD-K36616567	doxepin	Histamine receptor antagonist
2721	0.64	cp	BRD-K14282469	LY-165163	Serotonin receptor antagonist
2722	0.63	cp	BRD-K82147103	lofepramine	Norepinephrine reuptake inhibitor
2723	0.63	cp	BRD-K90976994	dehydrocholic-acid	Bile acid
2724	0.63	cp	BRD-A28856712	tetryzoline	Adrenergic receptor agonist
2726	0.63	cp	BRD-K53737926	amitriptyline	Norepinephrine inhibitor
2732	0.6	cp	BRD-K68202742	trichostatin-a	HDAC inhibitor
2733	0.6	cp	BRD-K40902647	vincamine	Adrenergic receptor antagonist
2734	0.6	cp	BRD-K63792901	arecaidine	Acetylcholine receptor agonist
2735	0.6	cp	BRD-A55913614	primaquine	Antimalarial
2736	0.6	cp	BRD-K14993104	bemegride	Chemoreceptor agonist
2737	0.6	cp	BRD-A29734509	disopyramide	Sodium channel blocker
2742	0.56	cp	BRD-K92301463	16,16-dimethylprostaglandin-e2	Prostanoid receptor agonist
2743	0.56	cp	BRD-K34533029	tyrphostin-AG-494	EGFR inhibitor
2748	0.55	cp	BRD-K63675182	triflupromazine	Dopamine receptor antagonist
2751	0.53	cp	BRD-A45889380	mepacrine	Cytokine production inhibitor
2756	0.49	cp	BRD-K96778649	tyrphostin-47	EGFR inhibitor
2757	0.49	cp	BRD-K64994968	progesterone	Progesterone receptor agonist
2758	0.49	cp	BRD-K90789829	nefazodone	Adrenergic inhibitor
2759	0.49	cp	BRD-K45033733	famciclovir	DNA polymerase inhibitor
2760	0.49	cp	BRD-A64092382	mexiletine	Sodium channel blocker
2761	0.47	cp	BRD-K50324045	avrainvillamide-analog-6	nucleophosmin inhibitor
2764	0.46	cp	BRD-K08619574	thioproperazine	Dopamine receptor antagonist
2765	0.46	cp	BRD-K16664969	GTP-14564	FLT3 inhibitor
2766	0.46	cp	BRD-A26032986	zaldaride	Calmodulin antagonist
2767	0.46	cp	BRD-K80431395	triciribine	AKT inhibitor
2770	0.46	cp	BRD-K47207162	zimelidine	Serotonin reuptake inhibitor
2775	0.42	cp	BRD-A35511923	L-803087	Somatostatin receptor agonist
2776	0.42	cp	BRD-K01095011	finasteride	5-alpha reductase inhibitor
2777	0.42	cp	BRD-K69600043	thiethylperazine	Dopamine receptor antagonist
2778	0.42	cp	BRD-K63945320	dihydrosamidin	Phospholipase inhibitor
2779	0.42	cp	BRD-A82238138	budesonide	Glucocorticoid receptor agonist
2780	0.42	cp	BRD-K14221570	benzopurpurin-4b	HIV entry inhibitor
2782	0.41	cp	BRD-K60060639	methyllidocaine	antiarrhythmic medication
2784	0.4	cp	BRD-K81855038	roxatidine	Histamine receptor antagonist
2785	0.39	cp	BRD-A41450521	tosufloxacin	Bacterial DNA gyrase inhibitor
2786	0.39	cp	BRD-K15567136	papaverine	Phosphodiesterase inhibitor
2787	0.39	cp	BRD-A91866971	SQ-29548	Thromboxane receptor antagonist
2788	0.39	cp	BRD-A51714012	venlafaxine	Adrenergic inhibitor
2791	0.38	cp	BRD-K47936004	piribedil	Dopamine receptor agonist
2794	0.36	cp	BRD-A35989968	megestrol	Progesterone receptor agonist
2795	0.35	cp	BRD-A41451487	PK-11195	Benzodiazepine receptor antagonist
2796	0.35	cp	BRD-K40887525	ritanserin	Serotonin receptor antagonist
2797	0.35	cp	BRD-K73196317	urapidil	Adrenergic receptor antagonist
2800	0.32	cp	BRD-A16444946	acarbose	Glucosidase inhibitor
2801	0.32	cp	BRD-A80017228	bendroflumethiazide	Sodium/potassium/chloride transporter inhibitor
2803	0.32	cp	BRD-K77908580	entinostat	HDAC inhibitor
2804	0.32	cp	BRD-K90027355	spironolactone	Mineralocorticoid receptor antagonist
2805	0.3	cp	BRD-K62965247	tipifarnib-P2	farnesyltransferase inhibitor
2807	0.28	cp	BRD-K68437527	EMF-bca1-60	caspase inhibitor
2808	0.28	cp	BRD-K90574421	ipsapirone	Serotonin receptor agonist
2809	0.28	cp	BRD-A16694057	bisphenol-a	PPAR receptor antagonist
2810	0.28	cp	BRD-K07303502	arachidonyl-trifluoro-methane	Cytosolic phospholipase inhibitor
2811	0.28	cp	BRD-K01292756	pimozide	Dopamine receptor antagonist
2813	0.25	cp	BRD-A26334849	propafenone	Antiarrhythmic
2814	0.25	cp	BRD-K10705233	GW-405833	Cannabinoid receptor agonist
2815	0.25	cp	BRD-K09631521	thiotepa	Cytochrome P450 inhibitor
2816	0.25	cp	BRD-A72758037	asiatic-acid	Apoptosis stimulant
2817	0.25	cp	BRD-K35559145	levomepromazine	Dopamine receptor antagonist
2818	0.25	cp	BRD-K68132782	terbinafine	Fungal squalene epoxidase inhibitor
2822	0.21	cp	BRD-K82795137	loratadine	Histamine receptor antagonist
2823	0.21	cp	BRD-K71534238	GW-9508	Free fatty acid receptor agonist
2824	0.21	cp	BRD-K45296539	ZD-7114	Adrenergic receptor agonist
2825	0.21	cp	BRD-K46317332	proadifen	Nitric oxide synthase inhibitor
2826	0.21	cp	BRD-K94512704	spiramide	Dopamine receptor antagonist
2827	0.21	cp	BRD-K37991163	paroxetine	Selective serotonin reuptake inhibitor (SSRI)
2828	0.21	cp	BRD-K86509404	iso-olomoucine	CDK inhibitor
2830	0.18	cp	BRD-K15025317	BAY-11-7821	NFkB pathway inhibitor
2831	0.18	cp	BRD-K10974103	diloxanide	Protein synthesis inhibitor
2832	0.14	cp	BRD-A92670106	tocainide	Sodium channel blocker
2836	0.11	cp	BRD-K43797669	genistein	Tyrosine kinase inhibitor
2837	0.11	cp	BRD-A64125466	dehydrocholic-acid	choleretic agent
2838	0.11	cp	BRD-A29485665	bicalutamide	Androgen receptor antagonist
2840	0.07	cp	BRD-K20742498	RS-39604	Serotonin receptor antagonist
2841	0.07	cp	BRD-A35588707	teniposide	Topoisomerase inhibitor
2845	0.04	cp	BRD-K63630713	etacrynic-acid	Sodium/potassium/chloride transporter inhibitor
2846	0.04	cp	BRD-K37289225	clozapine	Dopamine receptor antagonist
2847	0.04	cp	BRD-K89732114	trifluoperazine	Dopamine receptor antagonist
2851	0.03	cp	BRD-K25224017	pirenperone	Serotonin receptor antagonist
2852	0.03	cp	BRD-K28936863	ketotifen	Histamine receptor agonist
2868	0	cp	BRD-K39569857	avrainvillamide-analog-3	nucleophosmin inhibitor
3258	0	cp	BRD-K54416256	methimazole	Antithyroid
3259	0	cp	BRD-K94070024	depomedrol	Glucocorticoid receptor agonist
3260	0	cp	BRD-K90864987	cobalt(II)-chloride	HSP inducer
3261	0	cp	BRD-K67977190	eprosartan	Angiotensin receptor antagonist
3262	0	cp	BRD-K50384076	7,4'-dihydroxyflavone	Opioid receptor antagonist
3263	0	cp	BRD-A87125127	3-matida	Glutamate receptor antagonist
3264	0	cp	BRD-A62890442	3-methyl-GABA	GABA aminotransferase activator
3265	0	cp	BRD-A29731977	17-hydroxyprogesterone-caproate	progesterone receptor agonist
3266	0	cp	BRD-A20589515	dihydroxyphenylglycine	Glutamate receptor agonist
3267	0	cp	BRD-A09495397	bicuculline	GABA receptor antagonist
3268	0	cp	BRD-K07736136	VX-702	p38 MAPK inhibitor
3269	0	cp	BRD-M16762496	PIK-75	DNA protein kinase inhibitor
3270	0	cp	BRD-K86930074	cediranib	KIT inhibitor
3271	0	cp	BRD-K99749624	linifanib	PDGFR receptor inhibitor
3272	0	cp	BRD-K36529613	PU-H71	HSP inhibitor
3273	0	cp	BRD-K64800655	PHA-793887	CDK inhibitor
3274	0	cp	BRD-K13566078	BMS-345541	IKK inhibitor
3275	0	cp	BRD-K99545815	PF-562271	Focal adhesion kinase inhibitor
3276	0	cp	BRD-K67506692	tyrphostin-AG-126	ERK1 and ERK2 phosphorylation inhibitor
3277	0	cp	BRD-K32710582	EI-247	IGF-1 inhibitor
3278	0	cp	BRD-K32610195	androstenedione	Cytochrome P450 inhibitor
3279	0	cp	BRD-K41170226	deoxycholic-acid	G protein-coupled receptor agonist
3280	0	cp	BRD-K73982490	BI-78D3	JNK inhibitor
3281	0	cp	BRD-K39944607	ochratoxin-a	Phenylalanyl tRNA synthetase inhibitor
3282	0	cp	BRD-A80960055	celastrol	Anti-inflammatory
3283	0	cp	BRD-A52193669	withaferin-a	IKK inhibitor
3284	0	cp	BRD-U51951544	ZG-10	JNK inhibitor
3285	0	cp	BRD-K24859147	KIN001-242	Protein kinase inhibitor
3286	0	cp	BRD-K19220233	JNK-9L	JNK inhibitor
3287	0	cp	BRD-K10467831	tibolone	Androgen receptor agonist
3288	0	cp	BRD-K50938786	ropivacaine	Sodium channel blocker
3289	0	cp	BRD-K59570838	homoveratrylamine	Dopamine analog
3290	0	cp	BRD-K30697463	desoximetasone	Glucocorticoid receptor agonist
3291	0	cp	BRD-K31471398	dihydrexidine	Dopamine receptor agonist
3292	0	cp	BRD-K52172416	anastrozole	Aromatase inhibitor
3293	0	cp	BRD-A59985574	topotecan	Topoisomerase inhibitor
3294	0	cp	BRD-K66175015	afatinib	EGFR inhibitor
3295	0	cp	BRD-K47761761	PD-168077	Dopamine receptor agonist
3296	0	cp	BRD-K13390322	AT-7519	CDK inhibitor
3297	0	cp	BRD-K49372556	mofezolac	Cyclooxygenase inhibitor
3298	0	cp	BRD-K54987996	CAY-10578	Casein kinase inhibitor
3299	0	cp	BRD-K87573634	propylpyrazole	Estrogen receptor agonist
3300	0	cp	BRD-U68942961	JW-7-24-1	LCK Inhibitor
3301	0	cp	BRD-U37049823	HG-6-64-01	RAF inhibitor
3302	0	cp	BRD-K64835161	BRD-K64835161	-666
3303	0	cp	BRD-K48115423	2-(4-methoxybenzylthio)-6-methylpyrimidin-4-ol	Matrix metalloprotease inhibitor
3304	0	cp	BRD-A71009679	KUC103420N	-666
3305	0	cp	BRD-A10070317	propranolol	Adrenergic receptor antagonist
3306	0	cp	BRD-A71657825	2-(biphenyl-4-ylsulfonamido)pentanedioic-acid	Matrix metalloprotease inhibitor
3307	0	cp	BRD-K04853698	LDN-193189	Serine/threonine kinase inhibitor
3308	0	cp	BRD-A79465854	auranofin	NFkB pathway inhibitor
3309	0	cp	BRD-K78659596	MLN-2238	Proteasome inhibitor
3310	0	cp	BRD-K74402642	NSC-632839	Ubiquitin specific protease inhibitor
3311	0	cp	BRD-K83289131	CAY-10618	NAMPT inhibitor
3312	0	cp	BRD-K17705806	JTC-801	Opioid receptor antagonist
3313	0	cp	BRD-A18579359	wiskostatin	Neural Wiskott-Aldrich syndrome protein inhibitor
3314	0	cp	BRD-A80502530	cinobufagin	ATPase inhibitor
3315	0	cp	BRD-K63606607	bufalin	ATPase inhibitor
3316	0	cp	BRD-K12260308	xanthoxyline	Antifungal
3317	0	cp	BRD-A96897502	U-74389F	Lipid peroxidase inhibitor
3318	0	cp	BRD-K18787491	U-0126	MEK inhibitor
3319	0	cp	BRD-K17415526	tyrphostin-AG-835	Protein tyrosine kinase inhibitor
3320	0	cp	BRD-K94176593	TWS-119	Glycogen synthase kinase inhibitor
3321	0	cp	BRD-A33833419	TER-14687	Inhibitor of translocation of PKCq in T cells
3322	0	cp	BRD-K51805276	temefos	Cholinesterase inhibitor
3323	0	cp	BRD-K25186396	tangeritin	Cell cycle inhibitor
3324	0	cp	BRD-K84595254	strophanthidin	ATPase inhibitor
3325	0	cp	BRD-K62609077	scoulerine	Adrenergic receptor antagonist
3326	0	cp	BRD-K72895815	SSR-69071	Leukocyte elastase inhibitor
3327	0	cp	BRD-K91243525	SR-142948	Neurotensin receptor antagonist
3328	0	cp	BRD-K25875056	SC-9	Protein tyrosine kinase activator
3329	0	cp	BRD-A49370193	RO-60-0175	Serotonin receptor agonist
3330	0	cp	BRD-A28970875	puromycin	Protein synthesis inhibitor
3331	0	cp	BRD-K04010869	prostaglandin-a1	HSP inducer
3332	0	cp	BRD-A95096829	PNU-96415E	Dopamine receptor antagonist
3333	0	cp	BRD-K43978949	PIT	Purinergic receptor antagonist
3334	0	cp	BRD-A75478957	PD-166793	Metalloproteinase inhibitor
3335	0	cp	BRD-A89337244	PD-102807	Acetylcholine receptor antagonist
3336	0	cp	BRD-A39522003	OMDM-2	FAAH inhibitor
3337	0	cp	BRD-K13169950	NSC-3852	HDAC inhibitor
3338	0	cp	BRD-A47633927	NPC-15199	ICAM1 antagonist
3339	0	cp	BRD-K10042277	desmethylclozapine	Acetylcholine receptor agonist
3340	0	cp	BRD-K60640630	mometasone	Glucocorticoid receptor agonist
3341	0	cp	BRD-K87696786	LY-456236	Glutamate receptor antagonist
3342	0	cp	BRD-K60230970	MG-132	Proteasome inhibitor
3343	0	cp	BRD-K09764130	mead-ethanolamide	Cannabinoid receptor agonist
3344	0	cp	BRD-K78637815	LY-320135	Cannabinoid receptor antagonist
3345	0	cp	BRD-K70241288	L-692585	Growth hormone releasing peptide ligand agonist
3346	0	cp	BRD-K17796732	JWH-015	Cannabinoid receptor agonist
3347	0	cp	BRD-K63150726	JTE-907	Cannabinoid receptor inverse agonist
3348	0	cp	BRD-A03359064	ICI-89406	Adrenergic receptor antagonist
3349	0	cp	BRD-K15196155	IBC-293	Hydroxycarboxylic acid receptor agonist
3350	0	cp	BRD-K50135270	GBR-12935	Dopamine uptake inhibitor
3351	0	cp	BRD-K63913457	eicosatrienoic-acid	Vasodilator
3352	0	cp	BRD-K92093830	doxorubicin	Topoisomerase inhibitor
3353	0	cp	BRD-K73391359	quinisocaine	Local anesthetic
3354	0	cp	BRD-K71499074	diclofenamide	Carbonic anhydrase inhibitor
3355	0	cp	BRD-K39965020	doconexent	PPAR receptor agonist
3356	0	cp	BRD-K31699485	DMEOB	glutamate receptor modulator
3357	0	cp	BRD-K89274813	DMP-543	Acetylcholine release stimulant
3358	0	cp	BRD-K26573499	DMAB-anabaseine	Adrenergic receptor agonist
3359	0	cp	BRD-K12906962	dichlorobenzamil	Sodium/calcium exchange inhibitor
3360	0	cp	BRD-A73909368	dactinomycin	RNA polymerase inhibitor
3361	0	cp	BRD-K37848908	ceforanide	Penicillin binding protein inhibitor
3362	0	cp	BRD-K59851896	calycanthine	GABA release inhibitor
3363	0	cp	BRD-A71459254	cymarin	ATPase inhibitor
3364	0	cp	BRD-A03816571	CP-55940	Cannabinoid receptor agonist
3365	0	cp	BRD-K91370081	anisomycin	DNA synthesis inhibitor
3366	0	cp	BRD-K51751936	alfadolone	GABA receptor agonist
3367	0	cp	BRD-K89930444	AG-592	Tyrosine kinase inhibitor
3368	0	cp	BRD-A39268308	epibatidine	Acetylcholine receptor agonist
3369	0	cp	BRD-K56403959	ZK-756326	CC chemokine receptor ligand
3370	0	cp	BRD-K41868777	W-5	Calmodulin antagonist
3371	0	cp	BRD-A92439610	triamcinolone	Glucocorticoid receptor agonist
3372	0	cp	BRD-A42831637	tetrahydrocannabinol-7-oic-acid	Anti-inflammatory
3373	0	cp	BRD-K50495309	SRC-kinase-inhibitor-I	SRC inhibitor
3374	0	cp	BRD-A72483914	spiroxatrine	Serotonin receptor antagonist
3375	0	cp	BRD-K52512893	SC-19220	Prostanoid receptor antagonist
3376	0	cp	BRD-K51541829	RO-25-6981	Ionotropic glutamate receptor antagonist
3377	0	cp	BRD-K83063356	RS-102895	CCR antagonist
3378	0	cp	BRD-K54665485	R-59022	Diacylglycerol kinase inhibitor
3379	0	cp	BRD-A34806832	proscillaridin	ATPase inhibitor
3380	0	cp	BRD-K49027941	PSB-1115	Adenosine receptor antagonist
3381	0	cp	BRD-K19227686	phenolphthalein	Indicator dye
3382	0	cp	BRD-A93477898	PETCM	Caspase activator
3383	0	cp	BRD-A45333398	periplocymarin	Apoptosis stimulant
3384	0	cp	BRD-K48735772	PD-158780	EGFR inhibitor
3385	0	cp	BRD-K21936341	oxotremorine	Acetylcholine receptor agonist
3386	0	cp	BRD-A68930007	ouabain	ATPase inhibitor
3387	0	cp	BRD-K79092138	nitrofural	Bacterial DNA inhibitor
3388	0	cp	BRD-K31542390	mycophenolic-acid	Dehydrogenase inhibitor
3389	0	cp	BRD-A33711280	metixene	Acetylcholine receptor antagonist
3390	0	cp	BRD-A85472596	L-670596	Prostanoid receptor antagonist
3391	0	cp	BRD-K57222227	indometacin	Cyclooxygenase inhibitor
3392	0	cp	BRD-A90515964	guaifenesin	Expectorant
3393	0	cp	BRD-A38749782	fludrocortisone	Glucocorticoid receptor agonist
3394	0	cp	BRD-K64755930	etazolate	Phosphodiesterase inhibitor
3395	0	cp	BRD-K47192521	icosapent	Platelet aggregation inhibitor
3396	0	cp	BRD-K50464341	berbamine	Calmodulin antagonist
3397	0	cp	BRD-K18518344	digitoxigenin	ATPase inhibitor
3398	0	cp	BRD-A94756469	digoxin	ATPase inhibitor
3399	0	cp	BRD-A93236127	digitoxin	ATPase inhibitor
3400	0	cp	BRD-K43389675	daunorubicin	RNA synthesis inhibitor
3401	0	cp	BRD-A62184259	cycloheximide	Protein synthesis inhibitor
3402	0	cp	BRD-A54487287	cortisone	Glucocorticoid receptor agonist
3403	0	cp	BRD-A65671304	candesartan	Angiotensin receptor antagonist
3404	0	cp	BRD-K43468059	byssochlamic-acid	Mycotoxin
3405	0	cp	BRD-A55484088	BNTX	Opioid receptor antagonist
3406	0	cp	BRD-K39987650	bisacodyl	Laxative
3407	0	cp	BRD-A65145453	ATPA	Glutamate receptor agonist
3408	0	cp	BRD-K20482099	rutin	Antioxidant
4843	0	cp	BRD-K49669041	BX-912	Pyruvate dehydrogenase kinase inhibitor
4844	0	cp	BRD-K87909389	alvocidib	CDK inhibitor
4845	0	cp	BRD-A07765530	epinephrine	carbonic anhydrase activator
4846	0	cp	BRD-K67080878	milrinone	Phosphodiesterase inhibitor
4847	0	cp	BRD-K07237224	moclobemide	Monoamine oxidase inhibitor
4848	0	cp	BRD-K61250553	loperamide	Opioid receptor agonist
4849	0	cp	BRD-A13946108	sulindac	Cyclooxygenase inhibitor
4850	0	cp	BRD-A75479906	rimantadine	Antiviral
4851	0	cp	BRD-K70976396	cefoxitin	Bacterial cell wall synthesis inhibitor
4852	0	cp	BRD-K78373679	RO-3306	CDK inhibitor
4853	0	cp	BRD-A51382177	fosinopril	ACE inhibitor
4854	0	cp	BRD-K67102207	phenylbutyrate	HDAC inhibitor
4855	0	cp	BRD-K11433652	aspirin	Cyclooxygenase inhibitor
4856	0	cp	BRD-K35458079	edaravone	Nootropic agent
4857	0	cp	BRD-K53790871	triamcinolone	Glucocorticoid receptor agonist
4858	0	cp	BRD-K40645748	mefloquine	Adenosine receptor antagonist
4859	0	cp	BRD-K57886322	fluocinonide	Glucocorticoid receptor agonist
4860	0	cp	BRD-K98763141	niflumic-acid	Cyclooxygenase inhibitor
4861	0	cp	BRD-K71926323	marbofloxacin	Bacterial DNA gyrase inhibitor
4862	0	cp	BRD-A25576662	streptozotocin	DNA alkylating agent
4863	0	cp	BRD-M64432851	sunitinib	FLT3 inhibitor
4864	0	cp	BRD-K72703948	ZM-447439	Aurora kinase inhibitor
4865	0	cp	BRD-A02333338	cyclopamine	Smoothened receptor antagonist
4866	0	cp	BRD-K35687265	ON-01910	PLK inhibitor
4867	0	cp	BRD-K10573841	tunicamycin	GLCNAC phosphotransferase inhibitor
4868	0	cp	BRD-K39823328	VU-0366037-2	Glutamate receptor modulator
4869	0	cp	BRD-K37456065	VU-0365114-2	M5 modulator
4870	0	cp	BRD-A13122391	triptolide	RNA polymerase inhibitor
4871	0	cp	BRD-K94325918	kinetin-riboside	Apoptosis stimulant
4872	0	cp	BRD-A18763547	BAX-channel-blocker	Cytochrome C release inhibitor
4873	0	cp	BRD-K55748775	SCH-28080	ATPase inhibitor
4874	0	cp	BRD-K86600316	RS-79948	Adrenergic receptor antagonist
4875	0	cp	BRD-A59303141	quinethazone	Thiazide diuretic
4876	0	cp	BRD-K21548250	moracizine	Sodium channel blocker
4877	0	cp	BRD-K13211965	L-741742	Dopamine receptor antagonist
4878	0	cp	BRD-A13133631	fluorometholone	Glucocorticoid receptor agonist
4884	-0.02	cp	BRD-K32501161	vanoxerine	Dopamine uptake inhibitor
4885	-0.02	cp	BRD-K55127134	fluphenazine	Dopamine receptor antagonist
4886	-0.02	cp	BRD-A97437073	rosiglitazone	Insulin sensitizer
4890	-0.03	cp	BRD-A34817987	itraconazole	Cytochrome P450 inhibitor
4891	-0.03	cp	BRD-K88789588	letrozole	Aromatase inhibitor
4892	-0.04	cp	BRD-K30480208	torasemide	Electrolyte reabsorption inhibitor
4894	-0.05	cp	BRD-A04706586	bucladesine	Adenosine receptor agonist
4897	-0.07	cp	BRD-K63165456	norcyclobenzaprine	Adrenergic receptor agonist
4898	-0.07	cp	BRD-K28307902	flutamide	Androgen receptor antagonist
4903	-0.1	cp	BRD-K62959606	sphingosine	Ceramidase inhibitor
4904	-0.11	cp	BRD-K68867920	quetiapine	Dopamine receptor antagonist
4905	-0.11	cp	BRD-A17655518	ibuprofen	Cyclooxygenase inhibitor
4906	-0.13	cp	BRD-K71035033	masitinib	KIT inhibitor
4909	-0.14	cp	BRD-K53972329	ruxolitinib	JAK inhibitor
4910	-0.14	cp	BRD-K15715913	fluperlapine	Serotonin receptor antagonist
4911	-0.14	cp	BRD-K81839095	estrone	Estrogen receptor agonist
4912	-0.14	cp	BRD-K57304726	PRE-084	Sigma receptor agonist
4913	-0.14	cp	BRD-A70514680	articaine	Local anesthetic
4915	-0.14	cp	BRD-K66615216	moxifloxacin	Bacterial DNA gyrase inhibitor
4916	-0.14	cp	BRD-K87226815	cycloserine	Bacterial cell wall synthesis inhibitor
4917	-0.14	cp	BRD-K82135108	elesclomol	Oxidative stress inducer
4920	-0.18	cp	BRD-K10670311	sulfasalazine	Antirheumatic
4921	-0.18	cp	BRD-K88429204	pyrimethamine	Dihydrofolate reductase inhibitor
4922	-0.18	cp	BRD-K18816859	L-694247	Serotonin receptor agonist
4923	-0.18	cp	BRD-K24132293	piperlongumine	Glutathione transferase inhibitor
4927	-0.21	cp	BRD-K19352500	prochlorperazine	Dopamine receptor antagonist
4928	-0.21	cp	BRD-K14693417	cinchonine	P-glycoprotein inhibitor
4929	-0.21	cp	BRD-K28183345	proguanil	Dihydrofolate reductase inhibitor
4932	-0.25	cp	BRD-A89434049	sarmentogenin	ATPase inhibitor
4933	-0.25	cp	BRD-K37865504	LY-2183240	FAAH inhibitor
4934	-0.28	cp	BRD-K15916496	clotrimazole	Cytochrome P450 inhibitor
4935	-0.28	cp	BRD-K90524085	MY-5445	Phosphodiesterase inhibitor
4936	-0.28	cp	BRD-K41713976	E-4031	Potassium channel blocker
4939	-0.28	cp	BRD-K63550407	erythromycin	NFkB pathway inhibitor
4940	-0.28	cp	BRD-K20655524	mefexamide	Psychoactive drug
4942	-0.3	cp	BRD-K50311478	tosyl-phenylalanyl-chloromethyl-ketone	Chymotrypsin inhibitor
4948	-0.32	cp	BRD-K09963420	saquinavir	HIV protease inhibitor
4949	-0.32	cp	BRD-A44780397	mifepristone	Glucocorticoid receptor antagonist
4950	-0.32	cp	BRD-K33459542	ditolylguanidine	Sigma receptor agonist
4951	-0.32	cp	BRD-K40624912	ZM-39923	JAK inhibitor
4953	-0.32	cp	BRD-K03816923	rottlerin	MAP kinase inhibitor
4955	-0.35	cp	BRD-K52930707	rescinnamine	ACE inhibitor
4956	-0.35	cp	BRD-A31575449	CGP-20712	Adrenergic receptor antagonist
4957	-0.35	cp	BRD-K70778732	trazodone	Adrenergic receptor antagonist
4958	-0.35	cp	BRD-A54490543	pirlindole	Monoamine oxidase inhibitor
4959	-0.35	cp	BRD-K96319534	phentermine	Dopamine uptake inhibitor
4960	-0.35	cp	BRD-A74667430	etodolac	Cyclooxygenase inhibitor
4961	-0.35	cp	BRD-A39390670	rabeprazole	ATPase inhibitor
4962	-0.35	cp	BRD-K49111258	prazosin	Adrenergic receptor antagonist
4963	-0.35	cp	BRD-K80738081	resveratrol	Cytochrome P450 inhibitor
4969	-0.39	cp	BRD-K67537649	PQ-401	IGF-1 inhibitor
4970	-0.39	cp	BRD-K95202259	ML-3163	p38 MAPK inhibitor
4971	-0.39	cp	BRD-A34751532	homosalate	HSP inducer
4972	-0.39	cp	BRD-K72222507	quinapril	ACE inhibitor
4973	-0.39	cp	BRD-K59332007	linopirdine	Potassium channel blocker
4976	-0.42	cp	BRD-K56700933	phenethyl-isothiocyanate	Antineoplastic
4977	-0.42	cp	BRD-K87048468	RS-102221	Serotonin receptor antagonist
4978	-0.42	cp	BRD-K03670461	tyrphostin-AG-82	EGFR inhibitor
4980	-0.42	cp	BRD-A42759514	ornidazole	Antiprotozoal
4984	-0.46	cp	BRD-A50684349	fenoldopam	Dopamine receptor agonist
4985	-0.46	cp	BRD-K64514229	toltrazuril	Antiprotozoal
4986	-0.46	cp	BRD-K74212935	ergocryptine	Dopamine agonist
4987	-0.46	cp	BRD-K40901640	cinanserin	Serotonin receptor antagonist
4990	-0.46	cp	BRD-K56343971	vemurafenib	RAF inhibitor
4993	-0.49	cp	BRD-K19605405	ZM-241385	Adenosine receptor antagonist
4994	-0.49	cp	BRD-A11813248	AM-92016	Potassium channel blocker
4995	-0.49	cp	BRD-K21733600	rofecoxib	Cyclooxygenase inhibitor
4996	-0.49	cp	BRD-K02637541	celecoxib	Cyclooxygenase inhibitor
5001	-0.53	cp	BRD-K60219430	serdemetan	MDM inhibitor
5002	-0.53	cp	BRD-K81209512	AG-494	EGFR inhibitor
5003	-0.53	cp	BRD-K12357156	AG-490	EGFR inhibitor
5004	-0.53	cp	BRD-A61793559	metolazone	Carbonic anhydrase inhibitor
5007	-0.53	cp	BRD-K60762818	desipramine	Tricyclic antidepressant
5008	-0.53	cp	BRD-K89997465	chlorpromazine	Dopamine receptor antagonist
5009	-0.53	cp	BRD-A80213327	NSC-23766	Ras GTPase inhibitor
5011	-0.55	cp	BRD-K33818169	GW-3965	LXR agonist
5015	-0.56	cp	BRD-K73397362	purmorphamine	Smoothened receptor agonist
5016	-0.56	cp	BRD-K57569181	pentoxifylline	Phosphodiesterase inhibitor
5017	-0.56	cp	BRD-K71860425	CDK2-5-inhibitor	CDK inhibitor
5020	-0.56	cp	BRD-K22193694	dioxybenzone	Topical sunscreen agent
5025	-0.6	cp	BRD-K36638830	anabasine	Acetylcholine receptor agonist
5026	-0.6	cp	BRD-A83431637	resmethrin	Cytochrome P450 inhibitor
5027	-0.6	cp	BRD-A10903566	imiloxan	Adrenergic receptor antagonist
5030	-0.6	cp	BRD-K97810537	beclometasone	Glucocorticoid receptor agonist
5031	-0.6	cp	BRD-K15563106	phloretin	Sodium/glucose cotransporter inhibitor
5034	-0.61	cp	BRD-K10995081	perphenazine	Dopamine receptor antagonist
5035	-0.63	cp	BRD-K11540476	EMF-BCA1-64	Caspase inhibitor
5036	-0.63	cp	BRD-K20141153	atomoxetine	Norepinephrine transporter inhibitor
5037	-0.63	cp	BRD-K18316707	O-1918	Cannabinoid receptor antagonist
5038	-0.63	cp	BRD-A32949107	MRS-1845	Calcium channel blocker
5039	-0.63	cp	BRD-K63151507	MNITMT	Lymphocyte inhibitor
5040	-0.63	cp	BRD-K34170797	fexaramine	FXR agonist
5041	-0.63	cp	BRD-K41564320	purvalanol-b	Tyrosine kinase inhibitor
5042	-0.63	cp	BRD-K62929068	6-benzylaminopurine	Purinergic receptor activator
5046	-0.63	cp	BRD-A77291778	cyclopentolate	Acetylcholine receptor antagonist
5047	-0.63	cp	BRD-K63828191	raloxifene	Estrogen receptor antagonist
5048	-0.63	cp	BRD-K38436528	imipramine	Norepinephrine reuptake inhibitor
5057	-0.67	cp	BRD-A62021152	WAY-161503	Serotonin receptor agonist
5058	-0.67	cp	BRD-K08109516	L-701324	Glutamate receptor antagonist
5060	-0.69	cp	BRD-K06159959	CCMQ	Inhibitor of the binding of homoquinolinic acid to non-NMDA sensitive sites
5061	-0.69	cp	BRD-K49049886	CGS-15943	Adenosine receptor antagonist
5065	-0.7	cp	BRD-K51302260	KU-C103871	GSP agonist
5066	-0.7	cp	BRD-A00100033	nifurtimox	DNA inhibitor
5067	-0.7	cp	BRD-A11135865	nor-binaltorphimine	Opioid receptor antagonist
5068	-0.7	cp	BRD-K96119599	leucodin	Melanin inhibitor
5074	-0.74	cp	BRD-K50866992	tropisetron	Serotonin receptor antagonist
5075	-0.74	cp	BRD-K06014311	DH-97	Melatonin receptor antagonist
5077	-0.74	cp	BRD-A83937277	mephenytoin	Hydantoin antiepileptic
5078	-0.74	cp	BRD-K77925998	quipazine	Serotonin receptor agonist
5084	-0.78	cp	BRD-K89125793	tinidazole	Antiprotozoal
5085	-0.78	cp	BRD-K06753942	nobiletin	MEK inhibitor
5086	-0.78	cp	BRD-A19661776	mianserin	Serotonin receptor antagonist
5087	-0.78	cp	BRD-K33860217	CP-94253	Serotonin receptor agonist
5089	-0.78	cp	BRD-K98530306	clonidine	Adrenergic receptor agonist
5093	-0.81	cp	BRD-K76698671	HNHA	HDAC inhibitor
5094	-0.81	cp	BRD-A29426959	carbinoxamine	Histamine receptor antagonist
5095	-0.81	cp	BRD-K93080877	Ala-Ala-Phe-CMK	Tripeptidyl peptidase inhibitor
5096	-0.81	cp	BRD-K09778810	FGIN-1-27	Inositol monophosphatase inhibitor
5102	-0.85	cp	BRD-A15530910	carpindolol	Adrenergic receptor antagonist
5103	-0.85	cp	BRD-K00486786	RO-08-2750	NGF binding inhibitor
5104	-0.85	cp	BRD-K17868609	BRL-54443	Serotonin receptor agonist
5105	-0.85	cp	BRD-K23335153	AMN-082	Glutamate receptor modulator
5109	-0.88	cp	BRD-K99616396	motesanib	KIT inhibitor
5110	-0.88	cp	BRD-A45499626	UBP-302	Glutamate receptor antagonist
5111	-0.88	cp	BRD-K32696739	noreleagnine	Monoamine oxidase inhibitor
5112	-0.88	cp	BRD-A78377521	monastrol	Kinesin-like spindle protein inhibitor
5113	-0.88	cp	BRD-A97479839	piperidolate	Acetylcholine receptor antagonist
5114	-0.88	cp	BRD-A93424738	dexamethasone	Glucocorticoid receptor agonist
5117	-0.88	cp	BRD-K92049597	triamterene	Sodium channel blocker
5120	-0.92	cp	BRD-K36324071	NF-449	Purinergic receptor antagonist
5121	-0.92	cp	BRD-K60174629	z-prolyl-prolinal	Prolyl endopeptidase inhibitor
5122	-0.92	cp	BRD-K96720755	relcovaptan	Vasopressin receptor antagonist
5123	-0.92	cp	BRD-A84174393	meloxicam	Cyclooxygenase inhibitor
5124	-0.92	cp	BRD-K59753853	MDL-29951	Glutamate receptor antagonist
5128	-0.95	cp	BRD-K70883034	nimetazepam	GABA receptor agonist
5129	-0.95	cp	BRD-K39462424	dexchlorpheniramine	Histamine receptor antagonist
5130	-0.95	cp	BRD-K47278471	diphenhydramine	Histamine receptor antagonist
5131	-0.95	cp	BRD-K52394958	GR-159897	Tachykinin antagonist
5132	-0.95	cp	BRD-K54759182	dosulepin	Norepinephrine reuptake inhibitor
5133	-0.95	cp	BRD-K46137903	prednicarbate	Phospholipase activator
5134	-0.95	cp	BRD-A48237631	mitomycin-c	DNA alkylating agent
5135	-0.95	cp	BRD-A54880345	etomidate	GABA receptor modulator
5144	-0.98	cp	BRD-K97863768	prothionamide	Mycobacterium tuberculosis enoyl-[acyl-carrier-protein] reductase [NADH] (inhA) inhibitor
5145	-0.99	cp	BRD-K14329163	BAY-K8644	Calcium channel activator
5146	-0.99	cp	BRD-K96862998	pirfenidone	TGF beta receptor inhibitor
5150	-1.02	cp	BRD-K81528515	nilotinib	ABL inhibitor
5151	-1.02	cp	BRD-K73319509	PF-04217903	c-Met inhibitor
5152	-1.02	cp	BRD-K96809896	SKF-86002	p38 MAPK inhibitor
5153	-1.02	cp	BRD-A75402480	desoxycorticosterone	Mineralocorticoid receptor agonist
5163	-1.06	cp	BRD-K63504947	semaxanib	VEGFR inhibitor
5164	-1.06	cp	BRD-A25143711	hydrocortisone	Glucocorticoid receptor agonist
5166	-1.09	cp	BRD-K81709173	halcinonide	Glucocorticoid receptor agonist
5167	-1.09	cp	BRD-K81521265	dicyclohexylurea	Epoxide hydolase inhibitor
5168	-1.09	cp	BRD-K18036262	L-168049	Glucagon receptor antagonist
5169	-1.09	cp	BRD-K50398167	meclofenamic-acid	Cyclooxygenase inhibitor
5170	-1.09	cp	BRD-A63998256	helveticoside	ATPase inhibitor
5172	-1.1	cp	BRD-A17428743	BW-723C86	Serotonin receptor agonist
5179	-1.13	cp	BRD-K13261168	LY-16350	Dopamine receptor agonist
5180	-1.13	cp	BRD-A60294240	tribenoside	Anti-inflammatory
5181	-1.13	cp	BRD-A06352508	SB-218078	CHK inhibitor
5189	-1.16	cp	BRD-K83597974	pargyline	Monoamine oxidase inhibitor
5192	-1.16	cp	BRD-A33447119	oxfendazole	Anthelmintic
5193	-1.16	cp	BRD-K36927236	glibenclamide	Sulfonylurea
5197	-1.19	cp	BRD-A31007383	SDZ-WAG-994	Adenosine receptor agonist
5201	-1.2	cp	BRD-K43880410	pregnenolone	glutamate receptor modulator
5202	-1.2	cp	BRD-K13800121	parecoxib	Cyclooxygenase inhibitor
5203	-1.2	cp	BRD-K49456190	prima-1-met	thioredoxin inhibitor
5205	-1.2	cp	BRD-K74501079	azithromycin	Bacterial 50S ribosomal subunit inhibitor
5207	-1.23	cp	BRD-K10466330	AVA	Nucleophosmin inhibitor
5208	-1.23	cp	BRD-K75615183	talipexole	Adrenergic receptor agonist
5209	-1.23	cp	BRD-K77947974	fluspirilene	Dopamine receptor antagonist
5211	-1.23	cp	BRD-A47598013	citalopram	Serotonin reuptake inhibitor
5212	-1.23	cp	BRD-K06593056	LE-135	Retinoid receptor agonist
5220	-1.27	cp	BRD-A64228451	terreic-acid	BTK inhibitor
5221	-1.27	cp	BRD-K34437622	BRD-K34437622	Thymidylate synthase inhibitor
5222	-1.27	cp	BRD-K09397065	SR-57227A	Serotonin receptor agonist
5223	-1.28	cp	BRD-A35912562	pregnenolone	Glutamate receptor modulator
5226	-1.29	cp	BRD-A75769826	SDM25N	Opioid receptor antagonist
5232	-1.3	cp	BRD-A67799922	phenoxybenzamine	Adrenergic receptor antagonist
5234	-1.32	cp	BRD-A47829399	artesunate	DNA synthesis inhibitor
5238	-1.33	cp	BRD-K75478907	GS-39783	GABA receptor modulator
5242	-1.34	cp	BRD-K67277431	picotamide	Thromboxane receptor antagonist
5243	-1.34	cp	BRD-K71430621	clobenpropit	Histamine receptor antagonist
5249	-1.34	cp	BRD-K32164935	tolazamide	ATP channel blocker
5250	-1.35	cp	BRD-A63043573	cabergoline	Dopamine receptor agonist
5251	-1.37	cp	BRD-A39415247	norethisterone	Progesterone receptor agonist
5252	-1.37	cp	BRD-K28667196	fillalbin	Increases arterial blood pressure
5256	-1.39	cp	BRD-K02607075	tubocurarine	Acetylcholine receptor antagonist
5260	-1.4	cp	BRD-K54330070	SB-202190	p38 MAPK inhibitor
5261	-1.41	cp	BRD-A49160188	donepezil	Acetylcholinesterase inhibitor
5263	-1.42	cp	BRD-K63923597	barasertib	Aurora kinase inhibitor
5264	-1.42	cp	BRD-A42167015	carteolol	Adrenergic receptor antagonist
5267	-1.43	cp	BRD-K96740444	itopride	Dopamine receptor antagonist
5273	-1.44	cp	BRD-K03384561	roquinimex	Angiogenesis inhibitor
5278	-1.45	cp	BRD-K19309090	SR-95639A	Acetylcholine receptor agonist
5281	-1.46	cp	BRD-A08187463	racecadotril	Enkephalinase inhibitor
5287	-1.48	cp	BRD-K23566484	nilutamide	Androgen receptor antagonist
5288	-1.48	cp	BRD-A30655177	LFM-A13	BTK inhibitor
5289	-1.48	cp	BRD-K88849294	lobaric-acid	Tyrosine phosphatase inhibitor
5298	-1.51	cp	BRD-K04210847	tamoxifen	Estrogen receptor antagonist
5299	-1.52	cp	BRD-K31627533	rimexolone	Glucocorticoid receptor agonist
5300	-1.52	cp	BRD-K66782112	BRD-K66782112	Histamine receptor antagonist
5305	-1.53	cp	BRD-K68143200	SA-792541	CDC inhibitor
5316	-1.59	cp	BRD-K45158365	valsartan	Angiotensin receptor antagonist
5318	-1.6	cp	BRD-K60511616	pravastatin	HMGCR inhibitor
5321	-1.62	cp	BRD-A48257147	PHCCC	Glutamate receptor agonist
5325	-1.64	cp	BRD-K62206109	VUF-5681	Histamine receptor antagonist
5326	-1.64	cp	BRD-K77793136	hydroxyfasudil	Rho associated kinase inhibitor
5327	-1.66	cp	BRD-K03109492	NSC-663284	CDC inhibitor
5331	-1.66	cp	BRD-A01320529	salmeterol	Adrenergic receptor agonist
5338	-1.68	cp	BRD-A10523515	GSK-429286A	Rho associated kinase inhibitor
5340	-1.69	cp	BRD-K73999723	telmisartan	Angiotensin receptor antagonist
5341	-1.69	cp	BRD-A14395271	mesoridazine	Dopamine receptor antagonist
5343	-1.69	cp	BRD-A16700644	isoxsuprine	Adrenergic receptor agonist
5349	-1.73	cp	BRD-K75295174	alisertib	Aurora kinase inhibitor
5350	-1.73	cp	BRD-A59174698	ritodrine	Adrenergic receptor agonist
5351	-1.73	cp	BRD-K15409150	penfluridol	T-type calcium channel blocker
5353	-1.73	cp	BRD-K38197229	bumetanide	Solute carrier family member inhibitor
5357	-1.75	cp	BRD-A71262238	nafadotride	Dopamine receptor antagonist
5359	-1.76	cp	BRD-K12932420	YM-976	Phosphodiesterase inhibitor
5360	-1.76	cp	BRD-K34608650	BRD-K34608650	Cannabinoid receptor agonist
5361	-1.76	cp	BRD-K06854232	AM-580	Retinoid receptor agonist
5369	-1.76	cp	BRD-K75089421	procainamide	Sodium channel blocker
5377	-1.8	cp	BRD-A74500471	ethambutol	Bacterial cell wall synthesis inhibitor
5378	-1.8	cp	BRD-A02176148	tubaic-acid	Mitochondrial complex I inhibitor
5379	-1.8	cp	BRD-A86044036	flurbiprofen	Cyclooxygenase inhibitor
5391	-1.83	cp	BRD-K06426971	ryuvidine	Histone lysine methyltransferase inhibitor
5392	-1.83	cp	BRD-K64670467	JNJ-16259685	Glutamate receptor antagonist
5393	-1.83	cp	BRD-K88560311	rucaparib	PARP inhibitor
5406	-1.85	cp	BRD-A38030642	cyclosporin-a	Calcineurin inhibitor
5409	-1.87	cp	BRD-K05151076	ZK-164015	Estrogen receptor antagonist
5410	-1.87	cp	BRD-K43330982	JTE-013	Lysophospholipid receptor antagonist
5411	-1.87	cp	BRD-K93332168	isocarboxazid	Monoamine oxidase inhibitor
5418	-1.89	cp	BRD-K93034159	cladribine	Adenosine deaminase inhibitor
5420	-1.9	cp	BRD-A87387433	cefpodoxime	Bacterial cell wall synthesis inhibitor
5427	-1.9	cp	BRD-K68191783	ALW-II-38-3	Ephrin inhibitor
5432	-1.94	cp	BRD-K13664374	dichloroacetic-acid	Pyruvate dehydrogenase kinase inhibitor
5439	-1.97	cp	BRD-K67174588	toremifene	Estrogen receptor antagonist
5440	-1.97	cp	BRD-K79930101	GW-583340	EGFR inhibitor
5442	-1.97	cp	BRD-K67637637	olopatadine	Histamine receptor antagonist
5443	-1.99	cp	BRD-K43736954	cortisone	Glucocorticoid receptor agonist
5445	-2	cp	BRD-K85503079	perospirone	Dopamine receptor antagonist
5449	-2.01	cp	BRD-K70881766	solanine	Acetylcholinesterase inhibitor
5450	-2.01	cp	BRD-A65615053	zacopride	Serotonin receptor antagonist
5451	-2.01	cp	BRD-A36074203	remacemide	Glutamate receptor antagonist
5458	-2.04	cp	BRD-K27351809	nomegestrol	Progesterone receptor agonist
5459	-2.04	cp	BRD-A38913120	BH3I-1	BCL inhibitor
5462	-2.04	cp	BRD-A09533288	verapamil	Calcium channel blocker
5467	-2.08	cp	BRD-K59456551	methotrexate	Dihydrofolate reductase inhibitor
5468	-2.08	cp	BRD-A99177642	deltaline	Acetylcholine receptor antagonist
5477	-2.08	cp	BRD-K20920669	cromoglicic-acid	Immunosuppressant
5478	-2.09	cp	BRD-K08417745	SID-26681509	Cathepsin inhibitor
5479	-2.1	cp	BRD-K14821540	FCCP	Mitochondrial oxidative phosphorylation uncoupler
5483	-2.11	cp	BRD-K89626439	sirolimus	MTOR inhibitor
5484	-2.11	cp	BRD-A20131130	2',5'-dideoxyadenosine	Adenylyl cyclase inhibitor
5485	-2.11	cp	BRD-K65639003	icariin	Phosphodiesterase inhibitor
5486	-2.11	cp	BRD-K99946902	hexylresorcinol	Local anesthetic
5497	-2.15	cp	BRD-K91733562	secoisolariciresinol	Antioxidant
5498	-2.15	cp	BRD-K29668683	BD-1063	Sigma receptor antagonist
5499	-2.15	cp	BRD-K35960502	niclosamide	DNA replication inhibitor
5503	-2.17	cp	BRD-A37817666	picrotoxin	GABA receptor antagonist
5504	-2.17	cp	BRD-A29082194	gitoxigenin	ATPase inhibitor
5506	-2.18	cp	BRD-A73605923	mocimycin	Protein synthesis inhibitor
5510	-2.18	cp	BRD-K05977355	fluconazole	Sterol demethylase inhibitor
5511	-2.2	cp	BRD-K72816382	cinalukast	Leukotriene receptor antagonist
5516	-2.22	cp	BRD-A81177136	KN-62	Calcium-calmodulin dependent protein kinase inhibitor
5517	-2.22	cp	BRD-A89672324	CGP-55845	GABA receptor antagonist
5518	-2.22	cp	BRD-A99833829	bethanechol	Acetylcholine receptor agonist
5525	-2.26	cp	BRD-K15592317	CP466722	ATM kinase inhibitor
5527	-2.27	cp	BRD-K51318897	fenbendazole	Tubulin inhibitor
5529	-2.29	cp	BRD-K68332390	ponalrestat	Aldose reductase inhibitor
5538	-2.32	cp	BRD-K04412738	tramadol	Norepinephrine reuptake inhibitor
5539	-2.32	cp	BRD-K06147391	telenzepine	Acetylcholine receptor antagonist
5544	-2.33	cp	BRD-K27871032	lysergol	Ergoline alkaloid
5545	-2.33	cp	BRD-K80639402	SB-258585	Serotonin receptor antagonist
5553	-2.36	cp	BRD-K97330509	SRC-kinase-inhibitor-II	SRC inhibitor
5562	-2.4	cp	BRD-K23383398	T-0901317	LXR agonist
5563	-2.4	cp	BRD-K81209159	herniarin	Acetylcholinesterase inhibitor
5564	-2.4	cp	BRD-K97764662	PD-173074	FGFR inhibitor
5567	-2.42	cp	BRD-K09635314	M-3M3FBS	phospholipase activator
5568	-2.43	cp	BRD-K63874012	thioperamide	Histamine receptor antagonist
5569	-2.43	cp	BRD-A29437505	RWJ-21757	TLR agonist
5570	-2.43	cp	BRD-A88282067	delcorine	Antiarrhythmic
5571	-2.43	cp	BRD-K89055274	alverine	Muscle relaxant
5572	-2.44	cp	BRD-A30590053	MR-16728	Acetylcholine release enhancer
5581	-2.47	cp	BRD-K71731651	PNU-120596	Acetylcholine receptor agonist
5582	-2.47	cp	BRD-K01648091	LE-300	Dopamine receptor antagonist
5583	-2.47	cp	BRD-K97158071	droperidol	Dopamine receptor antagonist
5596	-2.55	cp	BRD-A65597028	RX-821002	Adrenergic receptor antagonist
5600	-2.57	cp	BRD-K91900765	VX-745	p38 MAPK inhibitor
5601	-2.57	cp	BRD-K59469039	AG-879	Angiogenesis inhibitor
5604	-2.59	cp	BRD-K66766661	17-beta-estradiol	Estrogen receptor agonist
5605	-2.61	cp	BRD-K77133231	PD-169316	p38 MAPK inhibitor
5616	-2.64	cp	BRD-A56359832	zileuton	Leukotriene inhibitor
5617	-2.64	cp	BRD-K23623876	decafluorobutane	Contrast agent
5618	-2.64	cp	BRD-K65786282	CGP-7930	GABA receptor modulator
5621	-2.64	cp	BRD-A02367930	ethinyl-estradiol	DNA directed DNA polymerase stimulant
5629	-2.67	cp	BRD-K88611939	aniracetam	Glutamate receptor agonist
5630	-2.68	cp	BRD-K54314721	zolmitriptan	Serotonin receptor agonist
5631	-2.68	cp	BRD-K62289640	lylamine	Cannabinoid receptor agonist
5632	-2.68	cp	BRD-K99107520	felbamate	Glutamate receptor antagonist
5639	-2.71	cp	BRD-K62374253	rufloxacin	Bacterial DNA gyrase inhibitor
5640	-2.71	cp	BRD-A64297288	amlodipine	Calcium channel blocker
5641	-2.71	cp	BRD-K45435259	SCH-23390	Dopamine receptor antagonist
5642	-2.71	cp	BRD-K93258693	GW-9662	PPAR receptor antagonist
5644	-2.71	cp	BRD-A81233518	glycopyrrolate	Acetylcholine receptor antagonist
5647	-2.73	cp	BRD-K66093087	FGIN-1-43	Benzodiazepine receptor agonist
5649	-2.75	cp	BRD-A95696066	nisoxetine	Norepinephrine reuptake inhibitor
5655	-2.78	cp	BRD-A36471396	biperiden	Acetylcholine receptor antagonist
5672	-2.85	cp	BRD-A26095496	clobetasol	Glucocorticoid receptor agonist
5674	-2.86	cp	BRD-K08547377	irinotecan	Topoisomerase inhibitor
5679	-2.87	cp	BRD-A68723818	brompheniramine	Histamine receptor antagonist
5680	-2.88	cp	BRD-K99922388	DPO-1	Potassium channel blocker
5681	-2.89	cp	BRD-K62012036	acitretin	Retinoid receptor agonist
5684	-2.89	cp	BRD-K97061094	azacyclonol	Histamine receptor antagonist
5685	-2.91	cp	BRD-K99447003	enalaprilat	ACE inhibitor
5687	-2.92	cp	BRD-K09549677	mibefradil	T-type calcium channel blocker
5688	-2.92	cp	BRD-K27737647	H-89	PKA inhibitor
5691	-2.93	cp	BRD-K71103788	duloxetine	Serotonin reuptake inhibitor
5693	-2.94	cp	BRD-K12516989	zaprinast	Phosphodiesterase inhibitor
5694	-2.94	cp	BRD-K60274257	dephostatin	Tyrosine phosphatase inhibitor
5696	-2.95	cp	BRD-A08709697	heliotrine	Pyrrolizidine alkaloid
5700	-2.98	cp	BRD-K16621777	enobosarm	Androgen receptor modulator
5705	-3.03	cp	BRD-K44353683	nateglinide	Insulin secretagogue
5706	-3.03	cp	BRD-A33084410	5'-guanidinonaltrindole	Opioid receptor antagonist
5713	-3.07	cp	BRD-K76568384	PHTPP	Estrogen receptor antagonist
5717	-3.09	cp	BRD-A10977446	carvedilol	Adrenergic receptor antagonist
5720	-3.1	cp	BRD-K84639753	safinamide	Dopamine uptake inhibitor
5721	-3.1	cp	BRD-A06726973	dibutyrylcyclic-gmp	cGMP analog
5722	-3.1	cp	BRD-K04546108	JAK3-inhibitor-VI	JAK inhibitor
5726	-3.14	cp	BRD-A11007541	BCI-hydrochloride	Protein phosphatase inhibitor
5727	-3.14	cp	BRD-A22380646	pantoprazole	ATPase inhibitor
5729	-3.14	cp	BRD-K68507560	dicycloverine	Acetylcholine receptor antagonist
5730	-3.14	cp	BRD-K50859149	sulfafurazole	Bacterial antifolate
5731	-3.14	cp	BRD-A66435872	HTMT	Histamine receptor agonist
5732	-3.14	cp	BRD-K35723520	darinaparsin	Apoptosis stimulant
5733	-3.14	cp	BRD-K71799949	carbamazepine	Carboxamide antiepileptic
5740	-3.17	cp	BRD-K54316499	tolterodine	Acetylcholine receptor antagonist
5745	-3.19	cp	BRD-K42098891	protriptyline	Tricyclic antidepressant
5748	-3.21	cp	BRD-A74904029	EI-231	Casein kinase inhibitor
5749	-3.21	cp	BRD-K29653726	topiramate	Carbonic anhydrase inhibitor
5751	-3.23	cp	BRD-K72029282	probucol	Atherogenesis inhibitor
5760	-3.28	cp	BRD-A14574269	UB-165	Acetylcholine receptor agonist
5761	-3.28	cp	BRD-A81795050	U-18666A	Oxidosqualene cyclase inhibitor
5762	-3.28	cp	BRD-K94920105	DR-2313	PARP inhibitor
5769	-3.31	cp	BRD-A17411484	carprofen	Cyclooxygenase inhibitor
5770	-3.31	cp	BRD-A04308630	genipin	Choleretic agent
5771	-3.31	cp	BRD-K48168960	propylthiouracil	Thyroid peroxidase inhibitor
5772	-3.31	cp	BRD-K46211610	tolazoline	Adrenergic receptor antagonist
5773	-3.32	cp	BRD-K61691971	avrainvillamide-analog-1	nucleophosmin inhibitor
5777	-3.32	cp	BRD-K74763371	bosentan	Endothelin receptor antagonist
5782	-3.35	cp	BRD-A06784547	MRS-1334	Adenosine receptor antagonist
5784	-3.35	cp	BRD-K53414658	tivozanib	VEGFR inhibitor
5788	-3.38	cp	BRD-K04430056	7-nitroindazole	nitric oxide synthase inhibitor
5789	-3.38	cp	BRD-K17561142	amiodarone	Potassium channel blocker
5794	-3.4	cp	BRD-A98431941	ephedrine	Adrenergic receptor agonist
5796	-3.42	cp	BRD-K47639036	flavoxate	Acetylcholine receptor antagonist
5800	-3.45	cp	BRD-K73589401	corticosterone	mineralocorticoid receptor agonist
5808	-3.5	cp	BRD-K68997413	PF-3845	FAAH inhibitor
5816	-3.52	cp	BRD-K54472332	elvitegravir	HIV integrase inhibitor
5817	-3.52	cp	BRD-K15164005	apoptosis-activator-II	Carboxylesterase inhibitor
5819	-3.53	cp	BRD-K77175907	calcifediol	Vitamin D receptor agonist
5828	-3.58	cp	BRD-K85015012	NNC-05-2090	GAT inhibitor
5831	-3.62	cp	BRD-A43082555	loxoprofen	Cyclooxygenase inhibitor
5834	-3.63	cp	BRD-K18742343	H-8	PKA inhibitor
5835	-3.63	cp	BRD-K84266862	BRL-50481	Phosphodiesterase inhibitor
5836	-3.63	cp	BRD-M45964048	verteporfin	Photosensitizing agent
5843	-3.66	cp	BRD-K97799481	theophylline	Adenosine receptor antagonist
5844	-3.66	cp	BRD-K44442813	pidotimod	Interferon receptor agonist
5848	-3.67	cp	BRD-K90382497	GW-843682X	PLK inhibitor
5853	-3.71	cp	BRD-A04756508	norgestimate	Progesterone receptor agonist
5854	-3.71	cp	BRD-K50417881	eticlopride	Dopamine receptor antagonist
5855	-3.72	cp	BRD-K19360254	ergocornine	Dopamine receptor agonist
5858	-3.74	cp	BRD-A51829654	BRL-15572	Serotonin receptor antagonist
5865	-3.76	cp	BRD-K40782193	QX-222	Sodium channel blocker
5867	-3.77	cp	BRD-K79437791	acetyl-farnesyl-cysteine	Inhibitor of methylation of endogenous isoprenylated proteins
5874	-3.83	cp	BRD-A23637604	oxymetholone	Androgen receptor agonist
5875	-3.83	cp	BRD-A61392169	eliprodil	Glutamate receptor antagonist
5879	-3.84	cp	BRD-A95939040	sertaconazole	Sterol demethylase inhibitor
5884	-3.88	cp	BRD-K74514084	pazopanib	KIT inhibitor
5885	-3.88	cp	BRD-K46018455	bezafibrate	PPAR receptor agonist
5886	-3.88	cp	BRD-K13725475	rhodomyrtoxin	Cytotoxic agent
5892	-3.91	cp	BRD-U66370498	androstanol	CAR antagonist
5893	-3.91	cp	BRD-U33728988	QL-X-138	MTOR inhibitor
5894	-3.91	cp	BRD-A49358627	ciprofibrate	PPAR receptor agonist
5902	-3.98	cp	BRD-A01317026	7,8-dihydro-L-biopterin	Dihydroneopterin aldolase inhibitor
5903	-4	cp	BRD-K81729199	AQ-RA741	Acetylcholine receptor antagonist
5909	-4.01	cp	BRD-K89152108	liothyronine	Thyroid hormone stimulant
5914	-4.05	cp	BRD-K41996876	tyrphostin-1	EGFR inhibitor
5923	-4.09	cp	BRD-A09828896	SKF-81297	Dopamine receptor agonist
5924	-4.09	cp	BRD-A79237180	ascorbic-acid	Antioxidant
5925	-4.1	cp	BRD-K46424862	hymecromone	Monoamine oxidase inhibitor
5927	-4.12	cp	BRD-K08115555	tyrphostin-AG-1288	TNF production inhibitor
5929	-4.12	cp	BRD-A16754160	ampicillin	Bacterial cell wall synthesis inhibitor
5937	-4.16	cp	BRD-K59037100	oxybenzone	Lipase inhibitor
5938	-4.16	cp	BRD-K03842655	penitrem-a	Potassium channel blocker
5942	-4.18	cp	BRD-K08806317	timolol	Adrenergic receptor antagonist
5943	-4.19	cp	BRD-K48367671	febuxostat	Xanthine oxidase inhibitor
5944	-4.19	cp	BRD-K62353524	DY-131	Estrogen receptor agonist
5945	-4.19	cp	BRD-K84663978	trequinsin	Phosphodiesterase inhibitor
5952	-4.22	cp	BRD-A22713669	BVT-948	Tyrosine phosphatase inhibitor
5954	-4.23	cp	BRD-A07395371	esmolol	Adrenergic receptor antagonist
5955	-4.23	cp	BRD-K48869804	icilin	TRPV agonist
5958	-4.25	cp	BRD-A26711594	nicardipine	Calcium channel blocker
5960	-4.26	cp	BRD-K77390737	xanthohumol	ATPase inhibitor
5961	-4.26	cp	BRD-A91008255	bepridil	Calcium channel blocker
5963	-4.27	cp	BRD-K10136726	tosyllysyl-chloromethyl-ketone	Chymotrypsin inhibitor
5968	-4.3	cp	BRD-K40619305	larixinic-acid	Compound that interacts with metal centers
5969	-4.3	cp	BRD-K92428153	mycophenolate-mofetil	Dehydrogenase inhibitor
5970	-4.3	cp	BRD-K68756823	FR-180204	-666
5972	-4.33	cp	BRD-K52020312	metronidazole	DNA inhibitor
5973	-4.33	cp	BRD-K53878242	MMPX	Phosphodiesterase inhibitor
5974	-4.33	cp	BRD-K95899059	LY-344864	Serotonin receptor agonist
5980	-4.36	cp	BRD-K99595596	salsolinol	Monoamine oxidase inhibitor
5985	-4.4	cp	BRD-K08273968	griseofulvin	Tubulin inhibitor
5986	-4.42	cp	BRD-K92446736	zatebradine	HCN channel blocker
5990	-4.42	cp	BRD-K37194137	III606050	Cytochrome P450 inhibitor
5991	-4.44	cp	BRD-A06390036	hydroquinidine	Antiarrhythmic
5993	-4.44	cp	BRD-K71823332	epothilone-a	Microtubule stabilizing agent
5998	-4.52	cp	BRD-K67831364	ZM-323881	VEGFR inhibitor
6000	-4.52	cp	BRD-K59184148	SB-216763	Glycogen synthase kinase inhibitor
6001	-4.53	cp	BRD-K60770992	pergolide	Dopamine receptor agonist
6004	-4.57	cp	BRD-A64977602	mirtazapine	Adrenergic receptor antagonist
6006	-4.58	cp	BRD-K17075857	chloroxine	Opioid receptor antagonist
6010	-4.66	cp	BRD-K96084870	DMBI	PDGFR receptor inhibitor
6013	-4.67	cp	BRD-K08589866	linsitinib	IGF-1 inhibitor
6018	-4.71	cp	BRD-K85383046	IAA-94	Chloride channel blocker
6022	-4.72	cp	BRD-A18620900	estriol	Estrogen receptor agonist
6024	-4.76	cp	BRD-A26384407	chlortalidone	Carbonic anhydrase inhibitor
6025	-4.76	cp	BRD-A53952395	prilocaine	Local anesthetic
6028	-4.78	cp	BRD-A94413429	NTNCB	Neuropeptide receptor antagonist
6029	-4.79	cp	BRD-K59597909	phenothiazine	Dopamine receptor antagonist
6031	-4.79	cp	BRD-A09472452	flecainide	Sodium channel blocker
6040	-4.85	cp	BRD-K92731339	perindopril	ACE inhibitor
6041	-4.86	cp	BRD-A69917777	aminopentamide	Acetylcholine receptor antagonist
6043	-4.87	cp	BRD-K44876623	zolpidem	Benzodiazepine receptor agonist
6044	-4.87	cp	BRD-K35377380	I-OMe-AG-538	IGF-1 inhibitor
6046	-4.88	cp	BRD-K12244279	MEK1-2-inhibitor	MEK inhibitor
6048	-4.9	cp	BRD-K82865713	prostaglandin-b2	cAMP inhibitor
6055	-4.93	cp	BRD-K79353516	indolophenanthridine	CALY activator
6057	-5	cp	BRD-A25234499	aminoglutethimide	Glucocorticoid receptor antagonist
6058	-5	cp	BRD-A87606379	nadolol	Adrenergic receptor antagonist
6059	-5.04	cp	BRD-K61480498	epoxycholesterol	LXR agonist
6064	-5.07	cp	BRD-K59273480	propentofylline	Adenosine reuptake inhibitor
6073	-5.14	cp	BRD-K35941380	methysergide	Serotonin receptor antagonist
6074	-5.14	cp	BRD-K74133369	oligomycin-a	ATP synthase inhibitor
6076	-5.16	cp	BRD-K30990140	FR-122047	Cyclooxygenase inhibitor
6079	-5.22	cp	BRD-K05737787	isoeugenol	Nitric oxide production inhibitor
6081	-5.23	cp	BRD-A16332958	modafinil	Adrenergic receptor agonist
6082	-5.25	cp	BRD-K31283835	tofacitinib	JAK inhibitor
6084	-5.31	cp	BRD-A25004090	erastin	Ion channel antagonist
6085	-5.32	cp	BRD-A01826957	xanthinol	Vasodilator
6087	-5.34	cp	BRD-K39670393	amthamine	Histamine receptor agonist
6088	-5.36	cp	BRD-A56245458	reichstein	Androgen receptor antagonist
6089	-5.36	cp	BRD-K46937689	phenazone	Cyclooxygenase inhibitor
6094	-5.39	cp	BRD-K83794624	pirarubicin	Topoisomerase inhibitor
6096	-5.43	cp	BRD-K95609758	BMS-191011	Potassium channel activator
6099	-5.5	cp	BRD-K84085265	CG-930	JNK inhibitor
6102	-5.54	cp	BRD-A68929948	DAPT-GSI-IX	Gamma secretase inhibitor
6106	-5.55	cp	BRD-A67605442	tetrahydrobiopterin	Nitric oxide stimulant
6110	-5.57	cp	BRD-K87142802	veliparib	PARP inhibitor
6111	-5.57	cp	BRD-K39915878	loxapine	Dopamine receptor antagonist
6114	-5.6	cp	BRD-A66927094	nemonapride	Dopamine receptor antagonist
6115	-5.6	cp	BRD-K89348303	ramipril	ACE inhibitor
6117	-5.62	cp	BRD-A52588987	SKF-83566	Dopamine receptor antagonist
6118	-5.63	cp	BRD-K53979406	ALX-5407	Glycine transporter inhibitor
6129	-5.72	cp	BRD-A16311756	profenamine	Butyrylcholinesterase inhibitor
6132	-5.76	cp	BRD-K08998509	fananserin	Dopamine receptor antagonist
6136	-5.83	cp	BRD-K51066026	aminoindazole	Ionophore
6140	-5.85	cp	BRD-K09859624	methantheline	Acetylcholine receptor antagonist
6141	-5.86	cp	BRD-K91904471	SD-169	p38 MAPK inhibitor
6146	-5.88	cp	BRD-K69688083	mestinon	Cholinesterase inhibitor
6149	-5.89	cp	BRD-K81473089	tacrine	Acetylcholinesterase inhibitor
6151	-5.9	cp	BRD-K33106058	cytarabine	Ribonucleotide reductase inhibitor
6152	-5.9	cp	BRD-K57631554	aminolevulinic-acid	Oxidizing agent
6155	-5.94	cp	BRD-K43796186	benzyl-quinazolin-4-yl-amine	EGFR inhibitor
6156	-5.96	cp	BRD-K16406336	methylene-blue	Guanylyl cyclase inhibitor
6158	-5.99	cp	BRD-U94846492	quinine	Hemozoin biocrystallization inhibitor
6161	-6.05	cp	BRD-K91336023	mesulergine	Dopamine receptor agonist
6162	-6.06	cp	BRD-A55756846	H-7	PKA inhibitor
6166	-6.1	cp	BRD-K64881305	ispinesib	Kinesin-like spindle protein inhibitor
6170	-6.12	cp	BRD-A67862938	naftidrofuryl	Adrenergic receptor antagonist
6172	-6.14	cp	BRD-A64933752	CV-1808	Adenosine receptor agonist
6173	-6.15	cp	BRD-A46186775	hydrocortisone	Glucocorticoid receptor agonist
6177	-6.18	cp	BRD-K86301799	dipyridamole	Phosphodiesterase inhibitor
6179	-6.19	cp	BRD-A44133049	azasetron	Serotonin receptor antagonist
6183	-6.24	cp	BRD-A29260609	acebutolol	Adrenergic receptor antagonist
6186	-6.27	cp	BRD-K08973992	linoleic-acid	Oxidative stress inducer
6190	-6.31	cp	BRD-A02481876	importazole	Importin-beta transport receptor inhibitor
6192	-6.32	cp	BRD-K94379058	BML-190	Cannabinoid receptor inverse agonist
6198	-6.38	cp	BRD-K13356952	methazolamide	Carbonic anhydrase inhibitor
6199	-6.38	cp	BRD-K12002134	megestrol	progesterone receptor agonist
6200	-6.39	cp	BRD-K06208435	YS-035	Calcium channel blocker
6202	-6.4	cp	BRD-A61470182	n-formylmethionylalanine	macrophage activator
6203	-6.41	cp	BRD-K43149758	myricetin	Androgen receptor agonist
6204	-6.42	cp	BRD-K08924299	palonosetron	Serotonin receptor antagonist
6205	-6.42	cp	BRD-K08132273	tyrphostin	EGFR inhibitor
6210	-6.51	cp	BRD-K14550461	doxercalciferol	Vitamin D receptor agonist
6211	-6.51	cp	BRD-K12120659	GR-144053	Integrin antagonist
6213	-6.52	cp	BRD-K49668410	clarithromycin	Bacterial 50S ribosomal subunit inhibitor
6214	-6.52	cp	BRD-K64451768	GANT-58	GLI antagonist
6215	-6.52	cp	BRD-K01624546	docosatrienoic-acid	LTB4 inhibitor
6216	-6.52	cp	BRD-A50764878	MDL-73005EF	Serotonin receptor antagonist
6227	-6.62	cp	BRD-A87719232	naproxen	Cyclooxygenase inhibitor
6237	-6.71	cp	BRD-K23192422	lestaurtinib	FLT3 inhibitor
6239	-6.77	cp	BRD-A19633847	perhexiline	Carnitine palmitoyltransferase inhibitor
6241	-6.8	cp	BRD-K84175871	pseudoephedrine	Adrenergic receptor agonist
6243	-6.83	cp	BRD-A43930669	L-368899	Oxytocin receptor antagonist
6247	-6.84	cp	BRD-K72093121	vidarabine	Antiviral
6250	-6.87	cp	BRD-A73859745	glycodeoxycholic-acid	Apoptosis stimulant
6252	-6.88	cp	BRD-K52662033	lidocaine	Histamine receptor agonist
6260	-6.96	cp	BRD-K47659338	EMD-386088	Serotonin receptor agonist
6263	-6.98	cp	BRD-K95309561	dienestrol	Estrogen receptor agonist
6265	-7	cp	BRD-A79981887	midodrine	Adrenergic receptor agonist
6266	-7.02	cp	BRD-K22828899	TUL-XXI039	Serine/threonine kinase inhibitor
6268	-7.02	cp	BRD-A88774919	doxycycline	Bacterial 30S ribosomal subunit inhibitor
6269	-7.04	cp	BRD-K81783531	VX-222	HCV inhibitor
6274	-7.07	cp	BRD-A65550283	ginsenoside	Steroid hormone receptor agonist
6275	-7.08	cp	BRD-K32311154	nifekalant	Potassium channel blocker
6285	-7.2	cp	BRD-A79903587	tegafur	Thymidylate synthase inhibitor
6289	-7.25	cp	BRD-K34820100	tebuthiuron	Photosynthesis inhibitor
6293	-7.3	cp	BRD-K14536225	piceid	Glucosidase inhibitor
6299	-7.35	cp	BRD-K08252256	diclofenac	Cyclooxygenase inhibitor
6300	-7.36	cp	BRD-K73838513	cinacalcet	Calcium channel activator
6301	-7.39	cp	BRD-K92015269	GBR-12783	Dopamine uptake inhibitor
6306	-7.44	cp	BRD-A54845972	dihydroergotamine	Serotonin receptor agonist
6308	-7.51	cp	BRD-A39646320	HC-toxin	HDAC inhibitor
6309	-7.51	cp	BRD-K99174507	cardiogenol-c	Cardiomyogenesis inducer
6311	-7.54	cp	BRD-A67438293	treprostinil	Prostacyclin analog
6312	-7.55	cp	BRD-A23359898	sibutramine	Serotonin reuptake inhibitor
6315	-7.56	cp	BRD-K94270326	ecopipam	Dopamine receptor antagonist
6317	-7.58	cp	BRD-K67261995	adipiodone	Contrast agent
6318	-7.58	cp	BRD-K35531059	molsidomine	Guanylyl cyclase activator
6324	-7.63	cp	BRD-K57179821	crotamiton	Antipruritic
6325	-7.64	cp	BRD-A13084692	troglitazone	Insulin sensitizer
6331	-7.68	cp	BRD-K07691486	roscovitine	CDK inhibitor
6337	-7.78	cp	BRD-K92817986	BJM-CSC-19	MEK inhibitor
6338	-7.79	cp	BRD-K45988865	tetramethylsilane	Internal standard for NMR spectroscopy
6339	-7.79	cp	BRD-K59058766	chlorprothixene	Dopamine receptor antagonist
6343	-7.82	cp	BRD-K82381502	acetylcholine	Acetylcholine receptor agonist
6345	-7.85	cp	BRD-K03981224	ethisterone	Progestogen hormone
6346	-7.85	cp	BRD-K18909381	CGS-12066B	Serotonin receptor agonist
6348	-7.88	cp	BRD-K88677950	PD-198306	MAP kinase inhibitor
6349	-7.88	cp	BRD-A80793822	pemoline	Dopamine receptor agonist
6353	-7.92	cp	BRD-K28863208	PNU-282987	Cholinergic receptor agonist
6354	-7.93	cp	BRD-A54236247	racephedrine	Adrenergic receptor agonist
6355	-7.96	cp	BRD-K82091397	SB-239063	p38 MAPK inhibitor
6359	-7.99	cp	BRD-K92492521	LY-255283	Leukotriene receptor antagonist
6360	-7.99	cp	BRD-K68558722	deracoxib	Cyclooxygenase inhibitor
6372	-8.14	cp	BRD-A09161221	nomilin	HSP inhibitor
6373	-8.14	cp	BRD-K61177364	NBI-27914	CRF receptor antagonist
6375	-8.16	cp	BRD-A17065207	brefeldin-a	Protein synthesis inhibitor
6381	-8.26	cp	BRD-A79672927	tropicamide	Acetylcholine receptor antagonist
6382	-8.27	cp	BRD-A30815329	felodipine	Calcium channel blocker
6383	-8.28	cp	BRD-A24817035	laudanosine	Central nervous system agent
6386	-8.3	cp	BRD-K87991767	umbelliferone	Cyclooxygenase inhibitor
6388	-8.32	cp	BRD-K68264559	brimonidine	Adrenergic receptor agonist
6391	-8.38	cp	BRD-K51662849	ilomastat	Matrix metalloprotease inhibitor
6393	-8.39	cp	BRD-K37798499	etoposide	Topoisomerase inhibitor
6394	-8.41	cp	BRD-A49225603	alimemazine	Histamine receptor agonist
6396	-8.47	cp	BRD-K73589491	nizatidine	Histamine receptor antagonist
6398	-8.49	cp	BRD-A42346008	metanephrine	Epinephrine metabolite
6406	-8.54	cp	BRD-A07440155	labetalol	Adrenergic receptor antagonist
6407	-8.55	cp	BRD-K95901403	XL-147	PI3K inhibitor
6408	-8.56	cp	BRD-A36630025	SN-38	Topoisomerase inhibitor
6411	-8.59	cp	BRD-K07117950	imperatorin	CDK inhibitor
6412	-8.6	cp	BRD-A01643550	prednisolone	Glucocorticoid receptor agonist
6413	-8.6	cp	BRD-K52075715	oxibendazole	Tubulin inhibitor
6417	-8.68	cp	BRD-K47717570	NBQX	Glutamate receptor antagonist
6422	-8.71	cp	BRD-K59637651	NSC-119889	Protein synthesis inhibitor
6424	-8.74	cp	BRD-K68402494	ML-9	Myosin light chain kinase inhibitor
6426	-8.76	cp	BRD-A24429032	HEAT	Adrenergic receptor antagonist
6428	-8.77	cp	BRD-K29173907	isoflupredone	Glucocorticoid receptor agonist
6431	-8.84	cp	BRD-A92177080	betamethasone	Glucocorticoid receptor agonist
6433	-8.85	cp	BRD-K28346421	rifapentine	RNA polymerase inhibitor
6441	-9.05	cp	BRD-K27710560	splitomycin	SIRT inhibitor
6442	-9.05	cp	BRD-K73978287	hydrocortisone	Glucocorticoid receptor agonist
6443	-9.07	cp	BRD-K46212057	voriconazole	Cytochrome P450 inhibitor
6445	-9.08	cp	BRD-K22009844	phenprobamate	Muscle relaxant
6446	-9.08	cp	BRD-K11399644	phenformin	AMPK activator
6452	-9.16	cp	BRD-K50018155	RS-67506	Serotonin receptor partial agonist
6455	-9.2	cp	BRD-K46862739	metyrapone	Cytochrome P450 inhibitor
6456	-9.22	cp	BRD-K62200014	anagrelide	Phosphodiesterase inhibitor
6459	-9.26	cp	BRD-K61269089	daphnetin	Protein kinase inhibitor
6463	-9.3	cp	BRD-K67298865	SB-431542	TGF beta receptor inhibitor
6466	-9.31	cp	BRD-K55344148	BU-224	Imidazoline receptor ligand
6467	-9.31	cp	BRD-K86434416	selegiline	Monoamine oxidase inhibitor
6468	-9.33	cp	BRD-K54708045	nTZDpa	PPAR receptor agonist
6469	-9.34	cp	BRD-K23583188	lavendustin-a	EGFR inhibitor
6471	-9.37	cp	BRD-K46766488	S-14506	Serotonin receptor agonist
6473	-9.42	cp	BRD-K26548821	quinpirole	Dopamine receptor agonist
6474	-9.42	cp	BRD-K93645900	tadalafil	Phosphodiesterase inhibitor
6477	-9.46	cp	BRD-K29313308	HDAC3-selective	HDAC inhibitor
6479	-9.54	cp	BRD-K46384212	o-3M3FBS	phospholipase activator
6481	-9.54	cp	BRD-K21520694	sulfacetamide	PABA antagonist
6484	-9.6	cp	BRD-A04553218	chlorphenamine	Histamine receptor antagonist
6486	-9.63	cp	BRD-K75699339	rizatriptan	Serotonin receptor agonist
6489	-9.71	cp	BRD-K76617868	fasudil	Rho associated kinase inhibitor
6495	-9.75	cp	BRD-A15415227	GW-1929	PPAR receptor agonist
6497	-9.77	cp	BRD-K93176058	AC-55649	Retinoid receptor agonist
6499	-9.83	cp	BRD-K37720887	SB-525334	TGF beta receptor inhibitor
6500	-9.85	cp	BRD-A83695761	chromanol	Potassium channel blocker
6501	-9.86	cp	BRD-A96456596	FPL-55712	Leukotriene receptor antagonist
6503	-9.88	cp	BRD-K95237249	probenecid	Uricosuric blocker
6505	-9.91	cp	BRD-A77299732	salubrinal	Eukaryotic translation initiation factor inhibitor
6510	-10	cp	BRD-K21350491	phenamil	TRPV antagonist
6516	-10.05	cp	BRD-A55815733	phylloquinone	Vitamin K
6519	-10.1	cp	BRD-K38305202	domperidone	Dopamine receptor antagonist
6520	-10.11	cp	BRD-A01295252	trans-7-hydroxy-pipat	Dopamine receptor ligand
6521	-10.12	cp	BRD-K02526760	QS-11	ARFGAP inhibitor
6522	-10.12	cp	BRD-K14200658	syrosingopine	Vesicular monoamine transporter inhibitor
6523	-10.13	cp	BRD-K86595100	chlordiazepoxide	Benzodiazepine receptor agonist
6524	-10.13	cp	BRD-K10098805	rhapontin	Apoptosis stimulant
6527	-10.23	cp	BRD-A77349281	RK-682	Tyrosine phosphatase inhibitor
6529	-10.27	cp	BRD-K70505054	ranitidine	Histamine receptor antagonist
6530	-10.28	cp	BRD-A70449690	forskolin	Adenylyl cyclase activator
6531	-10.31	cp	BRD-K23204545	busulfan	DNA inhibitor
6533	-10.36	cp	BRD-K09471561	levofloxacin	Bacterial DNA gyrase inhibitor
6536	-10.39	cp	BRD-K61993165	niacin	NAD precursor with lipid lowering effects
6540	-10.47	cp	BRD-A98702003	carbenoxolone	11-beta-HSD1 inhibitor
6541	-10.48	cp	BRD-K93325701	damnacanthal	SRC inhibitor
6542	-10.48	cp	BRD-A26097136	bulleyaconitine-a	Non-opiod analgesic
6543	-10.48	cp	BRD-A31204924	mitotane	Antineoplastic
6544	-10.49	cp	BRD-K06980535	promazine	Dopamine receptor antagonist
6546	-10.54	cp	BRD-K04993501	cefixime	Bacterial cell wall synthesis inhibitor
6549	-10.58	cp	BRD-A10420615	cyclopiazonic-acid	ATPase inhibitor
6553	-10.62	cp	BRD-K88759641	EMD-66684	Angiotensin receptor antagonist
6554	-10.62	cp	BRD-A75368507	demeclocycline	Bacterial 30S ribosomal subunit inhibitor
6555	-10.63	cp	BRD-A55416093	colforsin	Adenylyl cyclase activator
6558	-10.65	cp	BRD-A52326238	isogedunin	HSP inhibitor
6559	-10.66	cp	BRD-A11990600	lorazepam	Benzodiazepine receptor agonist
6560	-10.66	cp	BRD-K01192156	tyrphostin-AG-112	Protein tyrosine kinase inhibitor
6568	-10.77	cp	BRD-K15588452	R-96544	Serotonin receptor antagonist
6570	-10.81	cp	BRD-A31800922	procyclidine	Acetylcholine receptor antagonist
6571	-10.82	cp	BRD-A79803969	memantine	Glutamate receptor antagonist
6572	-10.84	cp	BRD-K01436366	XMD-1150	Leucine rich repeat kinase inhibitor
6573	-10.86	cp	BRD-A43671941	oxprenolol	Adrenergic receptor antagonist
6574	-10.87	cp	BRD-K95402279	geranylgeraniol	Farnesyltransferase inhibitor
6575	-10.87	cp	BRD-K74765201	tomelukast	Leukotriene receptor antagonist
6576	-10.89	cp	BRD-A08877921	cephalotaxine	Protein synthesis inhibitor
6580	-10.92	cp	BRD-K47328134	lysylphenylalanyl-tyrosine	Heparin activation inhibitor
6583	-11.02	cp	BRD-K10016611	pyridine-2-aldoxime	Acetylcholinesterase inhibitor
6586	-11.06	cp	BRD-K48722833	iloperidone	Dopamine receptor antagonist
6588	-11.08	cp	BRD-K38903228	hesperidin	Flavanone glycoside
6591	-11.12	cp	BRD-K88871508	lisuride	Dopamine receptor agonist
6592	-11.12	cp	BRD-K59419204	AM-281	Cannabinoid receptor antagonist
6593	-11.13	cp	BRD-K77171813	proxyfan	Histamine receptor modulator
6594	-11.14	cp	BRD-K39733634	L-161982	Prostanoid receptor antagonist
6595	-11.16	cp	BRD-K86887724	dofetilide	Potassium channel blocker
6599	-11.36	cp	BRD-K50325075	UCL-2077	Slow after hyperpolarization channel blocker
6607	-11.49	cp	BRD-A96799240	4-hydroxyretinoic-acid	Retinoid receptor binder
6608	-11.51	cp	BRD-A20697603	thiostrepton	FOXM1 inhibitor
6609	-11.51	cp	BRD-K72726508	arcyriaflavin-a	CDK inhibitor
6615	-11.59	cp	BRD-K85119730	tolbutamide	ATP channel blocker
6619	-11.67	cp	BRD-K05906022	limonin	HIV protease inhibitor
6622	-11.77	cp	BRD-K10961822	latanoprost	Prostanoid receptor agonist
6623	-11.78	cp	BRD-K70301876	escitalopram	Selective serotonin reuptake inhibitor (SSRI)
6631	-11.94	cp	BRD-K90333595	phentolamine	Adrenergic receptor antagonist
6632	-11.94	cp	BRD-K31987754	oleylethanolamide	Cannabinoid receptor agonist
6635	-11.99	cp	BRD-A48809242	IB-MECA	Adenosine receptor agonist
6637	-12.03	cp	BRD-A90311807	cilastatin	Dehydropeptidase inhibitor
6640	-12.05	cp	BRD-A44090213	indoprofen	Cyclooxygenase inhibitor
6643	-12.17	cp	BRD-K76674262	homoharringtonine	Protein synthesis inhibitor
6644	-12.18	cp	BRD-A77118605	BML-ST330	Phospholipase inhibitor
6657	-12.39	cp	BRD-A55594068	vinblastine	Microtubule inhibitor
6660	-12.45	cp	BRD-K94080537	diethyltoluamide	DEET activator of fly antenna ionotropic receptor IR40a
6664	-12.63	cp	BRD-A98378129	talniflumate	Cyclooxygenase inhibitor
6667	-12.68	cp	BRD-A12016240	LY-278584	Serotonin receptor antagonist
6669	-12.72	cp	BRD-K02407574	parbendazole	Tubulin inhibitor
6672	-12.76	cp	BRD-K15791587	L-733060	Tachykinin antagonist
6674	-12.78	cp	BRD-K38003476	clocortolone	Glucocorticoid receptor agonist
6676	-12.79	cp	BRD-K70557564	zosuquidar	P-glycoprotein inhibitor
6677	-12.81	cp	BRD-A71203467	l-stepholidine	Dopamine receptor antagonist
6679	-12.93	cp	BRD-K38323065	phenacetin	Cyclooxygenase inhibitor
6681	-12.95	cp	BRD-K27184429	levocetirizine	Histamine receptor antagonist
6682	-12.96	cp	BRD-A90799790	isradipine	Calcium channel blocker
6683	-12.97	cp	BRD-K74913225	brinzolamide	Carbonic anhydrase inhibitor
6685	-13.03	cp	BRD-K25394294	oxaprozin	Cyclooxygenase inhibitor
6690	-13.11	cp	BRD-K31553034	zibotentan	Endothelin receptor antagonist
6691	-13.12	cp	BRD-A24191444	ifenprodil	Adrenergic receptor antagonist
6692	-13.12	cp	BRD-A95445494	maackiain	Sodium/glucose cotransporter inhibitor
6694	-13.13	cp	BRD-A73581086	ergometrine	Adrenergic receptor agonist
6695	-13.14	cp	BRD-A20968261	WAY-213613	Glutamate inhibitor
6698	-13.17	cp	BRD-K56115039	BU-226	Imidazoline receptor ligand
6699	-13.18	cp	BRD-K97309399	thiothixene	Dopamine receptor antagonist
6700	-13.21	cp	BRD-K24576554	AT-9283	JAK inhibitor
6704	-13.28	cp	BRD-A28746609	paclitaxel	Tubulin inhibitor
6706	-13.32	cp	BRD-K16277217	piperacetazine	Dopamine receptor antagonist
6707	-13.32	cp	BRD-K67445247	flurofamide	Urease inhibitor
6708	-13.34	cp	BRD-K83636919	entacapone	Catechol O methyltransferase inhibitor
6711	-13.39	cp	BRD-K39746403	erythromycin	NFkB pathway inhibitor
6713	-13.43	cp	BRD-K76534306	enrofloxacin	Bacterial DNA gyrase inhibitor
6715	-13.46	cp	BRD-K89402695	L-655240	Thromboxane receptor antagonist
6726	-13.64	cp	BRD-K28578425	cilostamide	Phosphodiesterase inhibitor
6727	-13.64	cp	BRD-K93461745	buspirone	Serotonin receptor agonist
6729	-13.69	cp	BRD-K82823076	RO-15-4513	GABA benzodiazepine site receptor inverse agonist
6730	-13.73	cp	BRD-K64245000	GW-4064	FXR agonist
6731	-13.74	cp	BRD-K40530731	hyoscyamine	Acetylcholine receptor antagonist
6734	-13.77	cp	BRD-K49657628	tyrphostin-AG-18	EGFR inhibitor
6737	-13.85	cp	BRD-K92723993	imatinib	BCR-ABL kinase inhibitor
6741	-13.95	cp	BRD-K27499107	carbacyclin	IP receptor activator
6744	-13.97	cp	BRD-A01346607	flumetasone	Glucocorticoid receptor agonist
6745	-13.98	cp	BRD-A96485169	EBPC	Aldose reductase inhibitor
6749	-14.03	cp	BRD-A21723284	naltriben	Opioid receptor antagonist
6753	-14.11	cp	BRD-A17453586	MDL-72832	Serotonin receptor agonist
6762	-14.47	cp	BRD-K32645441	dipropyl-5ct	Serotonin receptor agonist
6763	-14.5	cp	BRD-A94709349	metaxalone	Muscle relaxant
6765	-14.51	cp	BRD-A45140972	meclocycline	Bacterial 30S ribosomal subunit inhibitor
6766	-14.52	cp	BRD-K67680372	CI-966	GAT inhibitor
6770	-14.61	cp	BRD-K05395900	nicotine	Acetylcholine receptor agonist
6771	-14.63	cp	BRD-K82109576	vincristine	Tubulin inhibitor
6772	-14.63	cp	BRD-A49906757	scopolamine	Acetylcholine receptor antagonist
6777	-14.66	cp	BRD-A70083328	secnidazole	Acetylcholinesterase inhibitor
6778	-14.68	cp	BRD-K06198550	isorotenone	Mitochondrial complex I inhibitor
6784	-14.73	cp	BRD-A80928489	1-monopalmitin	P-glycoprotein inhibitor
6789	-14.8	cp	BRD-K12762134	XAV-939	Tankyrase inhibitor
6790	-14.81	cp	BRD-K97118047	4,5,6,7-tetrabromobenzotriazole	Casein kinase inhibitor
6792	-14.82	cp	BRD-K77641333	naphazoline	Adrenergic receptor agonist
6796	-14.91	cp	BRD-A04352665	maraviroc	CC chemokine receptor antagonist
6797	-14.93	cp	BRD-K48692744	NU-1025	PARP inhibitor
6799	-14.99	cp	BRD-K92678294	irilin-a	Isoflavone
6800	-15.02	cp	BRD-K66956375	oleoylethanolamide	Cannabinoid receptor agonist
6805	-15.04	cp	BRD-K54790157	trioxsalen	DNA synthesis inhibitor
6807	-15.06	cp	BRD-K49519092	immethridine	Histamine receptor agonist
6812	-15.1	cp	BRD-A03623303	metoprolol	Adrenergic receptor antagonist
6815	-15.13	cp	BRD-A78360835	cercosporin	Photoactivated toxin
6818	-15.14	cp	BRD-K55591206	epigallocatechin	Nitric oxide synthase inhibitor
6819	-15.16	cp	BRD-K52459643	prostaglandin-e1	Prostanoid receptor agonist
6820	-15.22	cp	BRD-K80527266	triacsin-c	Adrenergic receptor antagonist
6821	-15.27	cp	BRD-K82357231	desloratadine	Histamine receptor antagonist
6822	-15.27	cp	BRD-A01145011	zebularine	DNA methyltransferase inhibitor
6827	-15.36	cp	BRD-K32536677	AGK-2	SIRT inhibitor
6836	-15.59	cp	BRD-K96144918	mead-acid	KPL-1 tumor suppressor
6837	-15.61	cp	BRD-K02275692	cefotiam	Bacterial cell wall synthesis inhibitor
6839	-15.61	cp	BRD-K33453211	levocabastine	Histamine receptor antagonist
6840	-15.63	cp	BRD-K07888196	tyrphostin-AG-538	IGF-1 inhibitor
6847	-15.77	cp	BRD-A52172093	VU-0413807-2	Calcium channel blocker
6848	-15.8	cp	BRD-A84189516	baccatin-III	Paclitaxel precursor
6852	-15.91	cp	BRD-A39255369	DCPIB	Chloride channel blocker
6853	-15.93	cp	BRD-K84987553	MDM2-inhibitor	MDM inhibitor
6859	-16.16	cp	BRD-K40213712	SAL-1	Adenosine receptor antagonist
6861	-16.17	cp	BRD-A71157293	fursultiamine	Vitamin B
6865	-16.2	cp	BRD-K76205745	losartan	Angiotensin receptor antagonist
6867	-16.28	cp	BRD-K60923938	veratridine	Sodium channel activator
6872	-16.32	cp	BRD-K55991774	BAS-09104376	HIV integrase inhibitor
6878	-16.44	cp	BRD-K64857848	XMD-885	Leucine rich repeat kinase inhibitor
6879	-16.44	cp	BRD-K04196797	oxcarbazepine	Sodium channel blocker
6882	-16.52	cp	BRD-K08996725	zolantidine	Histamine receptor antagonist
6883	-16.52	cp	BRD-K93188295	ARC-239	Adrenergic receptor antagonist
6894	-16.91	cp	BRD-K13927029	retinol	Retinoid receptor ligand
6895	-16.93	cp	BRD-A41995253	brucine	Glycine receptor antagonist
6898	-16.96	cp	BRD-A93255169	thalidomide	TNF production inhibitor
6899	-16.99	cp	BRD-K50388907	fenofibrate	PPAR receptor agonist
6903	-17.08	cp	BRD-K16195444	oxymetazoline	Adrenergic receptor agonist
6905	-17.18	cp	BRD-K28453807	nitrocaramiphen	Cholinergic receptor antagonist
6910	-17.34	cp	BRD-K60160658	tiagabine	GABA uptake inhibitor
6917	-17.49	cp	BRD-A23683907	NAS-181	Serotonin receptor antagonist
6918	-17.52	cp	BRD-K26373640	IKK-2-inhibitor	IKK inhibitor
6920	-17.52	cp	BRD-K03406345	azacitidine	DNA methyltransferase inhibitor
6927	-17.64	cp	BRD-K04710043	hexamethylenebisacetamide	AKT inhibitor
6930	-17.69	cp	BRD-K45330754	diethylstilbestrol	Estrogen receptor agonist
6931	-17.72	cp	BRD-K76810206	nicergoline	Adrenergic receptor antagonist
6932	-17.75	cp	BRD-K08703257	3-amino-benzamide	PARP inhibitor
6933	-17.8	cp	BRD-K56301217	ABT-737	BCL inhibitor
6936	-17.95	cp	BRD-K82036761	sertraline	Serotonin receptor antagonist
6945	-18.21	cp	BRD-K41903098	diphenoxylate	Opioid receptor agonist
6948	-18.23	cp	BRD-A82656074	naltrindole	Opioid receptor antagonist
6951	-18.31	cp	BRD-A53131506	epitestosterone	Inactive testosterone analog
6957	-18.38	cp	BRD-K53561341	KIN001-220	Aurora kinase inhibitor
6958	-18.51	cp	BRD-A60070924	alpha-estradiol	Estrogen receptor agonist
6961	-18.61	cp	BRD-A02189320	met-leu-phe	-666
6963	-18.66	cp	BRD-K15933101	ropinirole	Dopamine receptor agonist
6964	-18.67	cp	BRD-K32906660	bis-tyrphostin	EGFR inhibitor
6969	-18.78	cp	BRD-K89839824	raltitrexed	Thymidylate synthase inhibitor
6970	-18.78	cp	BRD-K00317371	RITA	MDM inhibitor
6972	-18.79	cp	BRD-K82255054	propofol	GABA receptor agonist
6973	-18.82	cp	BRD-K44899736	RO-16-6941	Monoamine oxidase inhibitor
6974	-18.89	cp	BRD-A49172652	lansoprazole	ATPase inhibitor
6975	-18.89	cp	BRD-K56047318	RHC-80267	Triacylglycerol lipase inhibitor
6978	-18.91	cp	BRD-K83963101	MLN-8054	Aurora kinase inhibitor
6979	-18.95	cp	BRD-A63836183	PD-123319	Angiotensin receptor antagonist
6981	-18.96	cp	BRD-K43245338	MDL-28170	Calpain inhibitor
6982	-18.99	cp	BRD-K36377456	marmesin	Angiogenesis inhibitor
[truncated: 430 more rows]
[truncated: 1 more columns]

## Sheet: Top10
-88.5	cp	BRD-K86727142	embelin	HCV inhibitor
-88.74	cp	BRD-K11630072	carmofur	Thymidylate synthase inhibitor
-90.86	cp	BRD-A61858259	CAY-10415	Insulin sensitizer
-91.54	cp	BRD-K04923131	GSK-3-inhibitor-IX	Glycogen synthase kinase inhibitor
-91.85	cp	BRD-K53959060	indirubin	CDK inhibitor
-93.79	cp	BRD-K50720187	flupirtine	Glutamate receptor antagonist
-93.87	cp	BRD-A14985772	ascorbyl-palmitate	antioxidant
-94.57	cp	BRD-K28143534	cyproheptadine	Histamine receptor antagonist
-95.78	cp	BRD-K79404599	enzastaurin	PKC inhibitor
-97.25	cp	BRD-K89687904	PKCbeta-inhibitor	PKC inhibitor
